# Supplementary material for: Parallel functional testing identifies enhancers active in early postnatal mouse brain
Source: eLife journal article supplement (doi:10.7554/elife.69479), 2021-10-04
Supplement: supp [file elife-69479-supp-v1.zip]

Archive with 24 entries (24 files):
- elife_poa_e69479_Transparent_Reporting_File.pdf
- elife_poa_e69479_Figure_1_figure_supplement_1.pdf
- elife_poa_e69479_Figure_1_figure_supplement_2.pdf
- elife_poa_e69479_Figure_1_figure_supplement_3.pdf
- elife_poa_e69479_Figure_1_figure_supplement_4.pdf
- elife_poa_e69479_Figure_2_figure_supplement_1.pdf
- elife_poa_e69479_Figure_2_figure_supplement_2.pdf
- elife_poa_e69479_Figure_2_figure_supplement_3.pdf
- elife_poa_e69479_Figure_2_figure_supplement_4.pdf
- elife_poa_e69479_Figure_2_figure_supplement_5.pdf
- elife_poa_e69479_Figure_3_figure_supplement_1.pdf
- elife_poa_e69479_Figure_3_figure_supplement_2.pdf
- elife_poa_e69479_Figure_4_figure_supplement_1.pdf
- elife_poa_e69479_Figure_4_figure_supplement_2.pdf
- elife_poa_e69479_Figure_4_figure_supplement_3.pdf
- elife_poa_e69479_Supplementary_file_1.csv
- elife_poa_e69479_Supplementary_file_2.csv
- elife_poa_e69479_Supplementary_file_3.csv
- elife_poa_e69479_Supplementary_file_4.csv
- elife_poa_e69479_Supplementary_file_5.csv
- elife_poa_e69479_Supplementary_file_6.csv
- elife_poa_e69479_Supplementary_file_7.csv
- elife_poa_e69479_Supplementary_file_8.xlsx
- elife_poa_e69479_Supplementary_file_9.csv
