# Supplementary material for: Parallel functional testing identifies enhancers active in early postnatal mouse brain
Source: eLife journal article supplement (doi:10.7554/elife.69479), 2021-10-04
Supplement: supp [file elife-69479-supp-v1.zip]

Figure 2–figure supplement 2

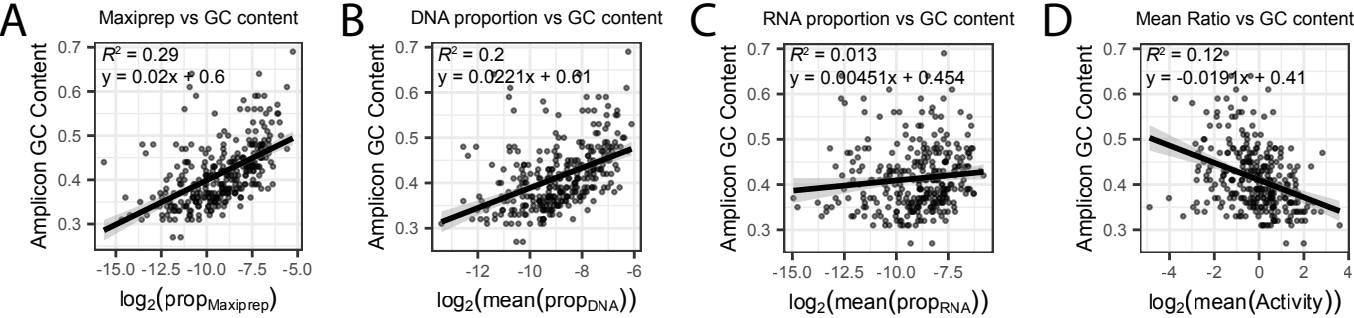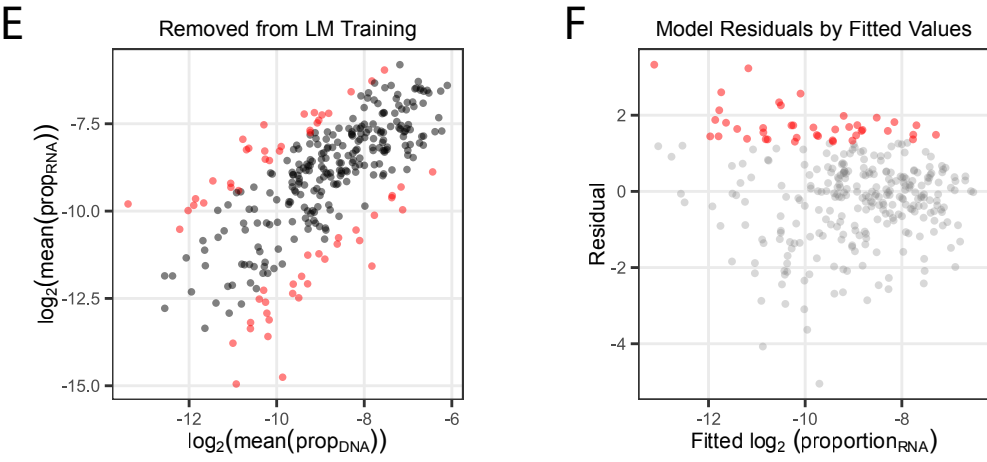

G Linear Model Parameters (without GC as a coefficient)

Call:  
lm(formula = log2(RNA\_prop\_mean) ~ log2(DNA\_prop\_mean), data = data.for.lm)

Residuals:

| Min      | 1Q       | Median  | 3Q      | Max     |
|----------|----------|---------|---------|---------|
| -1.89246 | -0.54850 | 0.06002 | 0.61099 | 1.62332 |

Coefficients:

|                     | Estimate | Std. Error | t value | Pr(> t ) |     |
|---------------------|----------|------------|---------|----------|-----|
| (Intercept)         | -0.78093 | 0.33900    | -2.304  | 0.0221   | *   |
| log2(DNA_prop_mean) | 0.92453  | 0.03837    | 24.094  | <2e-16   | *** |

Signif. codes: 0 '\*\*\*' 0.001 '\*\*' 0.01 '\*' 0.05 '.' 0.1 ' ' 1

Residual standard error: 0.8307 on 246 degrees of freedom  
Multiple R-squared: 0.7024, Adjusted R-squared: 0.7012  
F-statistic: 580.5 on 1 and 246 DF, p-value: <2.2e-16

H Linear Model Parameters (with GC as a coefficient)

Call:  
lm(formula = log2(RNA\_prop\_mean) ~ log2(DNA\_prop\_mean) + GC, data = data.for.lm)

Residuals:

| Min      | 1Q       | Median   | 3Q      | Max     |
|----------|----------|----------|---------|---------|
| -1.88097 | -0.48373 | -0.00093 | 0.51671 | 1.81914 |

Coefficients:

|                     | Estimate | Std. Error | t value | Pr(> t ) |     |
|---------------------|----------|------------|---------|----------|-----|
| (Intercept)         | 1.93109  | 0.56097    | 3.442   | 0.000678 | *** |
| log2(DNA_prop_mean) | 1.0486   | 0.03944    | 25.838  | <2e-16   | *** |
| GC                  | -4.6829  | 0.77173    | -5.869  | 1.42e-08 | *** |

Signif. codes: 0 '\*\*\*' 0.001 '\*\*' 0.01 '\*' 0.05 '.' 0.1 ' ' 1

Residual standard error: 0.7794 on 245 degrees of freedom  
Multiple R-squared: 0.7391, Adjusted R-squared: 0.7369  
F-statistic: 346.9 on 2 and 245 DF, p-value: <2.2e-16
