# Supplementary material for: Parallel functional testing identifies enhancers active in early postnatal mouse brain
Source: eLife journal article supplement (doi:10.7554/elife.69479), 2021-10-04

# Figure 2—figure supplement 1

## A Correlations between DNA replicates

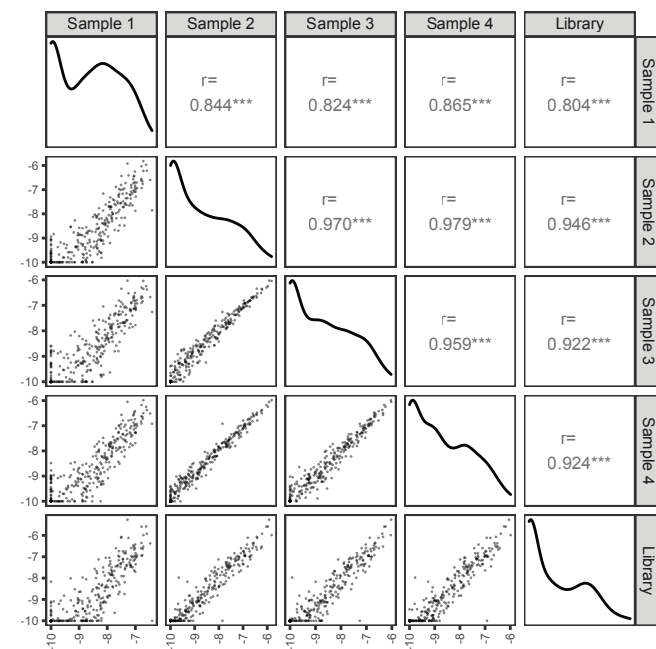

## B Correlations between RNA replicates

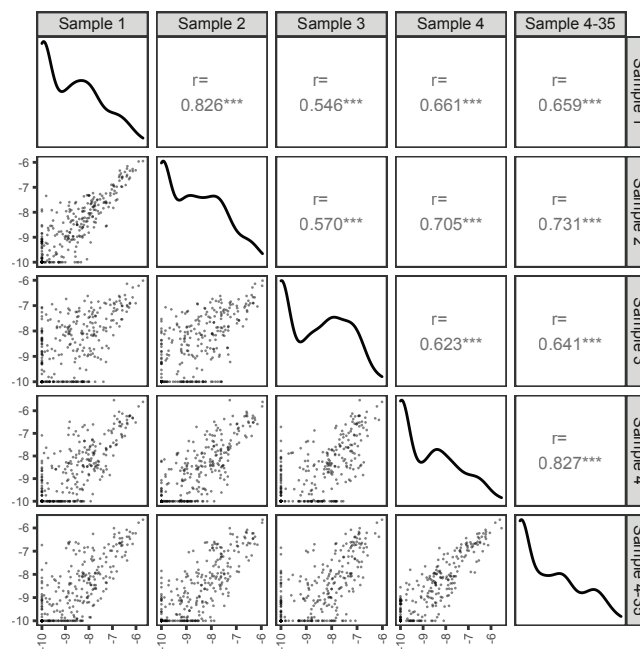

Supplement: supp [file elife-69479-supp-v1.zip › elife_poa_e69479_Figure_2_figure_supplement_1.pdf]
