# Supplementary material for: Parallel functional testing identifies enhancers active in early postnatal mouse brain
Source: eLife journal article supplement (doi:10.7554/elife.69479), 2021-10-04

Figure 4–figure supplement 3

A Amplicon #2 (No significant enhancer activity in MPRA)

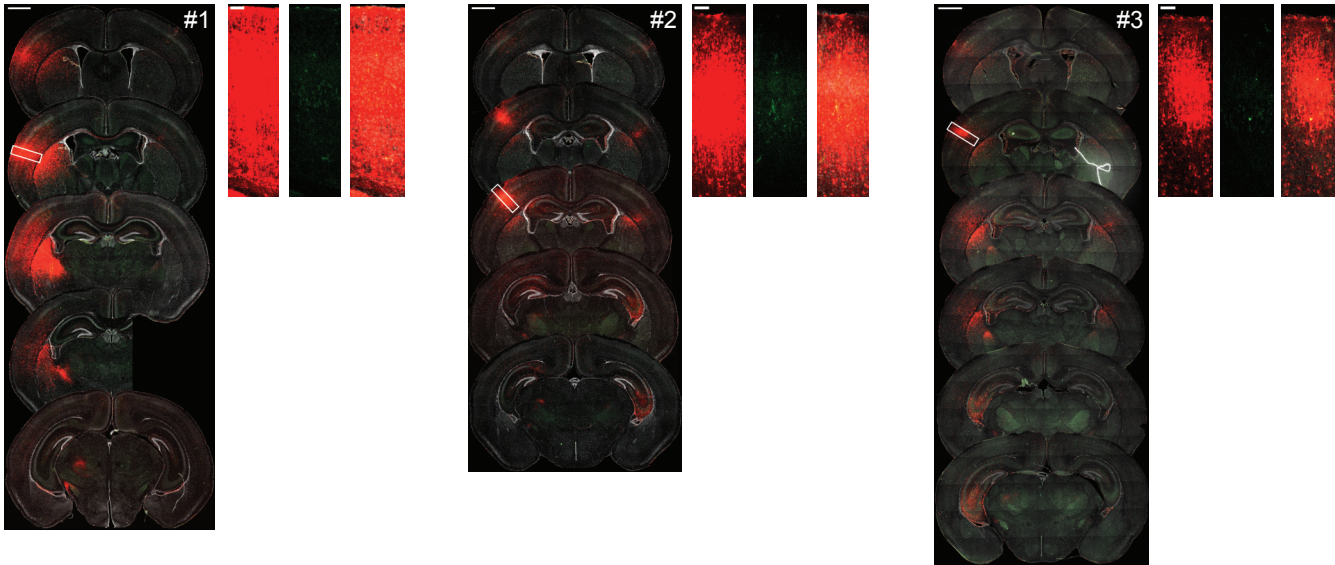

B Amplicon #3 (Positive enhancer activity in MPRA)

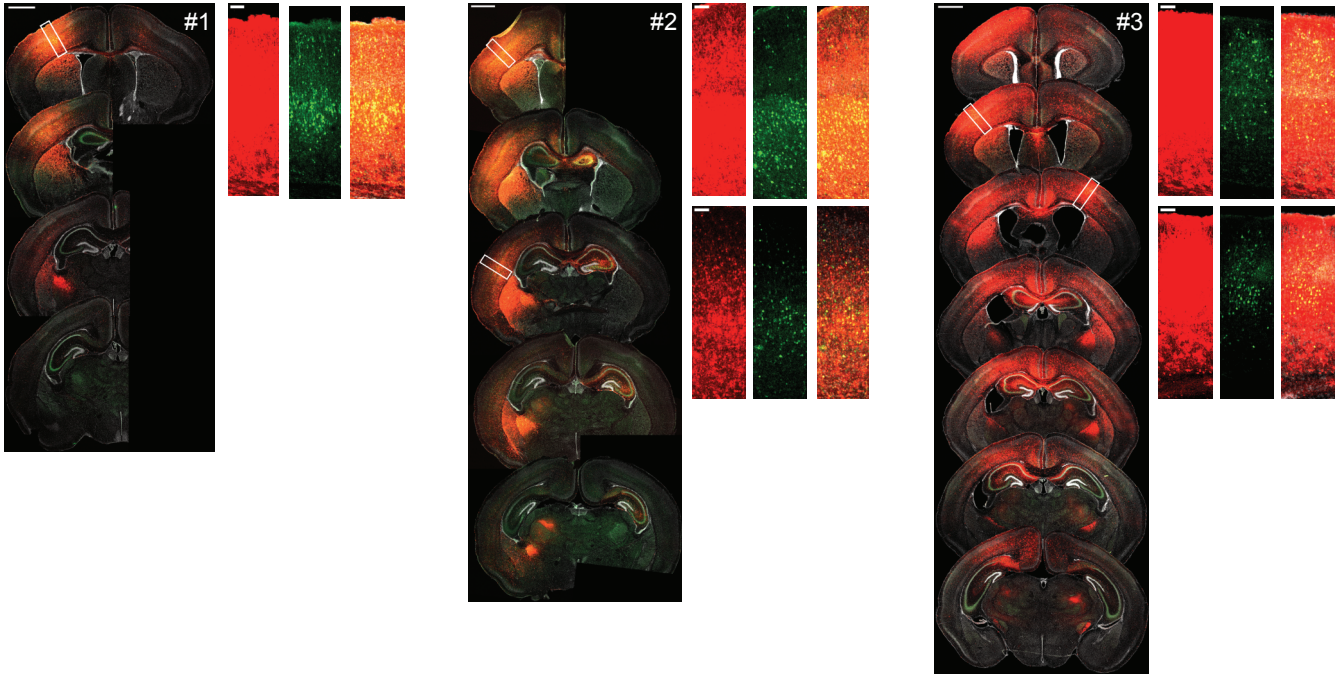

C Amplicon #6 (Positive enhancer activity in MPRA)

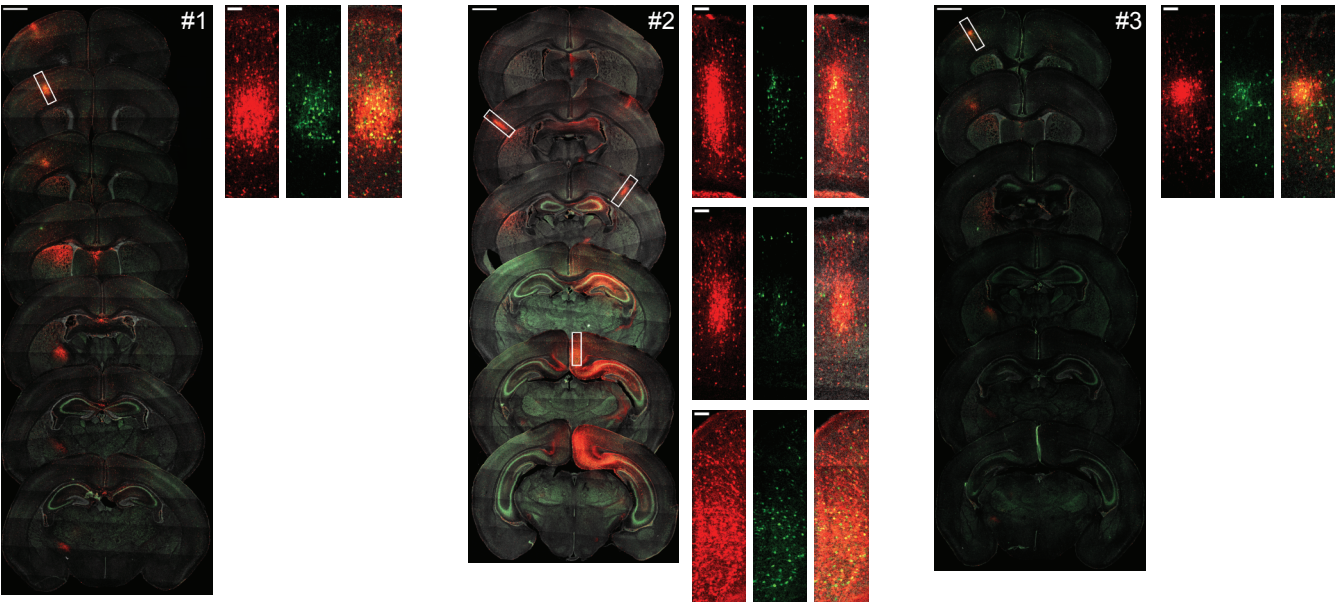

Supplement: supp [file elife-69479-supp-v1.zip › elife_poa_e69479_Figure_4_figure_supplement_3.pdf]
