# Supplementary material for: Parallel functional testing identifies enhancers active in early postnatal mouse brain
Source: eLife journal article supplement (doi:10.7554/elife.69479), 2021-10-04
Supplement: supp [file elife-69479-supp-v1.zip › elife_poa_e69479_Supplementary_file_3.csv]

Chr	Start_GRCh38	End_GRCh38	Amp_name	Maxi_counts	L1_DNA_count	L2_DNA_count	L3_DNA_count	L4_DNA_count	L1_RNA_count	L2_RNA_count	L3_RNA_count	L4_RNA_count	L4_RNA_count_35	Cloned_successfully
12	2221756	2222671	1_CACNA1C	717	1981	1193	1662	2327	42	8978	43	4	37	TRUE
12	2259007	2259927	10_CACNA1C	7542	17461	6058	11225	5406	16133	10677	16020	223	430	TRUE
2	166103938	166104812	100_SCN1A	33563	36341	21702	26774	16499	40793	64333	53532	24897	33306	TRUE
2	166108137	166109012	101_SCN1A	24892	36149	15376	17365	12573	481	1166	54092	1106	775	TRUE
2	166111466	166112355	102_SCN1A	34427	47610	19710	38153	19728	9858	26481	56571	21078	16364	TRUE
2	166112828	166113742	103_SCN1A	21089	53297	15108	15414	13420	26368	30385	92098	16026	19921	TRUE
2	166116291	166117190	104_SCN1A	1287	3	618	116	627	8	238	18452	8	2332	TRUE
2	166121820	166122705	105_SCN1A	5764	4477	5378	6290	5875	195	403	722	296	4728	TRUE
2	166124622	166125521	106_SCN1A	114643	77755	58171	78103	56276	13220	7511	32445	11407	10166	TRUE
2	166130634	166131533	107_SCN1A	3412	6473	3063	4735	1009	65	35	18	35	8	TRUE
2	166133080	166133979	108_SCN1A	14873	21203	13317	14324	11862	51026	78797	29839	28577	24171	TRUE
2	166134644	166135572	109_SCN1A	17068	23209	11949	13633	16163	349	8404	181	4284	5660	TRUE
12	2264510	2265429	11_CACNA1C	162115	113672	106012	125465	96002	129767	168528	100385	121187	79091	TRUE
2	166136064	166136985	110_SCN1A	33573	28282	19339	33543	15842	425	642	30041	5626	6714	TRUE
2	166138716	166139621	111_SCN1A	169870	72503	77234	100167	62216	94050	134473	76065	71342	35509	TRUE
2	166141792	166142721	112_SCN1A	29076	52731	16582	26928	14546	802	27684	31525	459	8161	TRUE
2	166142876	166143784	113_SCN1A	50471	57291	31735	42612	26251	38708	45166	54128	28533	16819	TRUE
2	166143876	166144775	114_SCN1A	22083	12496	11644	18806	16930	8175	29938	46999	8083	810	TRUE
2	166151801	166152715	115_SCN1A	10631	34930	8407	9172	9436	19910	10629	74558	5486	22488	TRUE
3	168143186	168144057	116_Epilepsy	7210	1548	4423	14904	4702	47728	100273	30005	34737	17357	TRUE
4	175086606	175087522	117_Epilepsy	78910	117035	38940	59141	41297	76667	83143	123213	64620	73394	TRUE
1	186900475	186901398	118_Epilepsy	33111	50197	16642	19564	13195	18338	20626	103204	22050	19828	TRUE
1	200857177	200858093	119_Epilepsy	8818	10185	5464	8915	12280	222	1548	122	1697	580	TRUE
12	2274374	2275292	12_CACNA1C	144139	88954	73763	96276	65072	56206	67138	34735	51332	67780	TRUE
1	239806532	239807447	120_Epilepsy	10610	31741	9080	14988	8663	25529	28887	410	15488	17076	TRUE
2	148300372	148301287	121_NCASD	8834	12943	6036	12763	6426	26739	30175	55353	26518	36087	TRUE
2	148302908	148303799	122_NCASD	1339	900	1312	1335	543	6548	13046	44618	932	6837	TRUE
2	148303776	148304690	123_NCASD	10620	16793	6439	9402	6005	764	10186	4565	3432	3847	TRUE
2	148305264	148306163	124_NCASD	28857	49734	18924	24949	18390	68842	62240	26331	22103	16069	TRUE
2	148305742	148306665	125_NCASD	17190	24526	11803	13270	12939	34255	44444	13260	12730	10870	TRUE
2	165401032	165401951	126_NCASD	47638	45010	23085	32557	21512	46545	42156	28791	15654	16393	TRUE
2	165401931	165402845	127_NCASD	23845	32160	14923	20660	17539	86540	72652	35671	72377	81204	TRUE
2	165406035	165406957	128_NCASD	21777	14680	14993	19071	19518	38322	9990	255	1643	693	TRUE
2	165410000	165410919	129_NCASD	8353	17751	7140	8172	7832	6722	21244	44238	6089	2906	TRUE
12	2277429	2278308	13_CACNA1C	102036	81462	70876	98002	61957	2466	27724	23967	23203	26885	TRUE
2	165419865	165420767	130_NCASD	22560	45415	16180	24178	21254	26300	22079	59454	6661	8241	TRUE
2	165424320	165425236	131_NCASD	30966	18554	15753	28656	16470	99609	135127	76630	49717	42022	TRUE
2	165428471	165429380	132_NCASD	3925	19632	4299	6163	5314	22929	17943	169	885	269	TRUE
2	165431334	165432248	133_NCASD	0	0	0	0	0	0	0	0	0	0	FALSE
2	165440105	165440974	134_NCASD	17581	43933	14071	21467	16059	107094	87141	99588	46224	56285	TRUE
2	165447625	165448520	135_NCASD	31774	28543	20496	22375	20150	30491	31979	33414	8208	2800	TRUE
2	165449846	165450745	136_NCASD	14103	34279	9535	9527	7916	37210	41934	20547	11984	14951	TRUE
2	165451390	165452307	137_NCASD	4129	7225	3581	6606	4291	18799	62396	780	11227	6602	TRUE
2	165452469	165453372	138_NCASD	38232	89483	25511	47011	28595	48069	60760	82201	29885	29418	TRUE
2	165452943	165453854	139_NCASD	56153	90139	31893	57984	34242	53364	83067	90278	53907	56204	TRUE
12	2285151	2286076	14_CACNA1C	169651	134835	93487	122779	75246	40320	70316	44953	37190	44334	TRUE
2	165453455	165454371	140_NCASD	30973	37766	16956	31380	16533	30902	60200	73302	63845	67859	TRUE
2	165462264	165463156	141_NCASD	42344	55201	25875	38757	31417	16219	66353	34930	24450	12931	TRUE
2	165462814	165463728	142_NCASD	22117	34035	13691	21919	16393	14740	38081	16272	12124	6480	TRUE
2	165465346	165466230	143_NCASD	26399	36031	20426	27972	18012	109952	127587	70445	47245	36078	TRUE
2	165466767	165467638	144_NCASD	3493	297	3269	3387	2745	13625	26788	145	9920	209	TRUE
2	165467987	165468886	145_NCASD	16131	32592	11596	15127	7803	369	348	140	205	4287	TRUE
2	165469324	165470238	146_NCASD	9583	20181	10211	17470	10230	14193	16412	272	8304	7019	TRUE
2	165469882	165470782	147_NCASD	9125	23913	9781	16429	10719	30308	32165	3083	10568	7709	TRUE
2	165470370	165471250	148_NCASD	4408	12324	5065	7570	6503	31468	29457	15869	7020	9231	TRUE
2	165471186	165472085	149_NCASD	7405	16749	6297	6656	7440	64043	76891	127746	25189	41217	TRUE
12	2292625	2293505	15_CACNA1C	129178	111685	85830	115966	72846	125974	128282	78575	64525	77481	TRUE
2	165471950	165472839	150_NCASD	5934	15800	6047	8836	7156	34059	44785	74648	18885	17266	TRUE
2	165472560	165473449	151_NCASD	11887	22293	10225	18492	12757	28606	39143	60330	38594	25173	TRUE
2	165473601	165474530	152_NCASD	3862	4034	3222	6348	3711	7265	7093	11426	4341	4384	TRUE
2	165474322	165475247	153_NCASD	17363	17348	13758	27458	15822	29969	29568	45856	19187	18868	TRUE
2	165475227	165476130	154_NCASD	15872	10790	8517	11830	8384	17483	24129	17603	35653	28346	TRUE
2	165476076	165476990	155_NCASD	128438	78723	63136	86359	66016	124499	184065	121588	82125	83346	TRUE
2	165478540	165479439	156_NCASD	18949	28633	12821	19896	15337	36419	52041	106704	35716	27844	TRUE
2	165497057	165497971	157_NCASD	36219	47688	23883	32744	32580	39464	51805	57226	12123	21334	TRUE
2	165497741	165498641	158_NCASD	46273	47752	30916	52434	34686	51984	80180	108021	30651	52269	TRUE
2	165498823	165499722	159_NCASD	22071	26774	13762	21342	14429	51945	60908	124838	24366	24015	TRUE
12	2298363	2299275	16_CACNA1C	78158	53014	63820	98581	47860	54298	72595	95689	46604	72688	TRUE
2	165499832	165500713	160_NCASD	9586	13077	9675	16497	9122	6407	9276	281	2137	3552	TRUE
2	165500720	165501601	161_NCASD	4801	7138	4936	11911	4159	39885	64097	52581	20329	31281	TRUE
2	165507640	165508555	162_NCASD	0	0	0	0	0	0	0	0	0	0	FALSE
2	165513155	165514071	163_NCASD	47933	56786	26785	40770	27224	44603	48396	19734	36634	32512	TRUE
5	14016330	14017201	164_NCASD	50193	50931	31303	34374	28896	42720	53959	89784	43092	31291	TRUE
5	14016792	14017710	165_NCASD	30490	31613	19349	21323	17679	26536	32618	52693	26555	18804	TRUE
5	14019625	14020543	166_NCASD	17429	50758	10094	14554	13408	49830	57906	84356	43316	25537	TRUE
5	14022861	14023775	167_NCASD	86385	42935	34971	58499	37651	108883	107248	127474	53348	80834	TRUE
5	14025314	14026230	168_NCASD	69866	55081	27540	45488	29495	18171	19339	46620	22076	27377	TRUE
5	14026781	14027695	169_NCASD	0	0	0	0	0	0	0	0	0	0	FALSE
12	2310594	2311510	17_CACNA1C	4980	2366	6313	9507	5705	137	22	36	11413	17	TRUE
5	14029911	14030804	170_NCASD	49146	66763	35571	37839	37588	80856	82070	79662	41069	55295	TRUE
5	14033922	14034811	171_NCASD	27846	17844	11097	15428	9612	4260	27528	12287	13246	14365	TRUE
5	14034700	14035599	172_NCASD	169955	105300	67386	89199	49673	26771	75135	63309	77947	81986	TRUE
5	14035617	14036531	173_NCASD	20420	37835	12405	20448	13678	539	26452	46166	8474	13656	TRUE
5	14036567	14037467	174_NCASD	31356	45623	13561	23201	12326	21641	18319	30084	3281	9079	TRUE
5	14041327	14042241	175_NCASD	343606	152621	145251	170786	112721	147373	169407	96771	112054	125092	TRUE
5	14046284	14047183	176_NCASD	134951	121975	74431	107042	66811	27470	63839	52994	40777	25376	TRUE
16	6859349	6860270	177_NCASD	166159	140239	83941	113502	81059	148715	210659	207754	100043	101692	TRUE
16	6859837	6860706	178_NCASD	198314	168674	94320	127260	93679	120511	199387	144109	92566	96880	TRUE
16	6861015	6861929	179_NCASD	23367	19703	10201	17530	10280	28991	49681	552	12156	10625	TRUE
12	2408551	2409465	18_CACNA1C	82334	113631	67120	92735	66924	58780	66889	71845	44423	21893	TRUE
16	6861685	6862599	180_NCASD	80549	44974	32064	42547	32186	30381	50238	947	31948	12632	TRUE
16	6862849	6863777	181_NCASD	12000	32416	5524	7854	8544	213	179	74	140	27	TRUE
16	6869566	6870483	182_NCASD	89275	91136	48204	65032	45293	118002	166621	148817	128031	114342	TRUE
16	6877487	6878404	183_NCASD	46060	45505	26599	48474	26855	20873	81951	95319	38331	31099	TRUE
16	6883119	6884019	184_NCASD	85242	90555	46765	63054	44103	52036	86348	51166	24685	18364	TRUE
16	6883651	6884520	185_NCASD	133203	116270	75764	106680	69163	80150	105640	24496	42000	31080	TRUE
16	6888140	6889039	186_NCASD	24143	50707	16544	27611	23108	17864	32817	33185	7288	4006	TRUE
16	6891330	6892229	187_NCASD	119156	85648	63187	84684	52915	91155	106716	116644	44778	41067	TRUE
16	6892833	6893759	188_NCASD	91100	109235	45442	56419	38881	24771	64609	137262	27240	72447	TRUE
16	6894419	6895298	189_NCASD	20480	8691	11676	21298	13772	36635	37951	28448	50864	66662	TRUE
12	2409650	2410571	19_CACNA1C	237091	98827	107155	140631	77147	101379	104462	122896	183076	131370	TRUE
16	6897295	6898211	190_NCASD	92043	81129	48622	62564	36567	42528	33553	29844	52266	64055	TRUE
16	6900578	6901499	191_NCASD	185490	111111	95962	124831	88788	158221	157148	108627	111392	101598	TRUE
16	6901392	6902311	192_NCASD	116092	103430	61176	91902	62779	80211	42470	120756	34039	47611	TRUE
16	6903440	6904328	193_NCASD	120366	95859	55992	67442	53066	192170	201220	121971	92430	112714	TRUE
16	6904419	6905336	194_NCASD	7144	23239	5088	3353	7766	151	7788	52	1173	57	TRUE
16	6905494	6906365	195_NCASD	125842	118092	58408	89490	55150	99436	70834	50950	33568	29160	TRUE
16	6911877	6912792	196_NCASD	6248	447	6641	11486	7572	21386	36773	339	109	235	TRUE
16	6913386	6914308	197_NCASD	96379	61273	44357	60980	39585	128805	160543	113467	61806	97572	TRUE
16	6914693	6915592	198_NCASD	13217	5829	11402	21032	15179	176	11516	206	126	90	TRUE
16	6917414	6918331	199_NCASD	0	0	0	0	0	0	0	0	2	0	FALSE
12	2223111	2224014	2_CACNA1C	53102	47742	41889	68823	43074	10734	43772	45392	11147	37894	TRUE
12	2411045	2411965	20_CACNA1C	176085	112618	103953	131207	91351	119244	150810	64810	83110	83453	TRUE
16	6918330	6919259	200_NCASD	0	0	0	0	0	0	0	0	0	0	FALSE
16	6926494	6927408	201_NCASD	0	0	0	0	0	0	0	0	0	0	FALSE
16	6927690	6928610	202_NCASD	124620	61557	49962	70241	37749	128981	165907	78702	58658	55470	TRUE
16	6928763	6929682	203_NCASD	41791	40171	21463	33303	22928	28915	29119	615	21386	7572	TRUE
16	6935389	6936294	204_NCASD	94730	75057	50748	66715	47013	46773	80320	148812	73275	74329	TRUE
16	6936071	6936944	205_NCASD	31312	29496	19527	30348	18086	36500	32672	98546	38742	31427	TRUE
16	6945774	6946669	206_NCASD	52067	79066	40011	56731	36919	15582	43048	78395	4329	1247	TRUE
16	6946946	6947869	207_NCASD	0	0	0	0	0	0	0	0	0	0	FALSE
16	6948990	6949919	208_NCASD	47450	55290	29601	52186	27943	40247	41452	4260	80634	34961	TRUE
16	6957534	6958451	209_NCASD	2082	4338	2149	2587	1772	40	24604	73	20	88	TRUE
12	2412100	2413011	21_CACNA1C	68478	87810	43178	63655	37393	46096	52998	1775	23968	25567	TRUE
16	6958250	6959130	210_NCASD	1265	12329	1365	641	1981	63	5932	19	38	20	TRUE
16	6965563	6966488	211_NCASD	1376	895	403	1491	3792	24	17170	84	16	110	TRUE
16	6967599	6968527	212_NCASD	36327	62592	15489	16336	21446	27491	27505	39283	691	15173	TRUE
16	6969312	6970228	213_NCASD	38185	77041	22032	29167	24726	149283	176728	115385	91273	50002	TRUE
16	6970961	6971877	214_NCASD	19225	13340	11483	20491	11549	298	248	10509	1344	121	TRUE
16	6971577	6972466	215_NCASD	40937	29327	23834	43931	21004	575	648	27483	2846	314	TRUE
16	6972969	6973868	216_NCASD	6846	13115	2396	2724	3013	15105	17047	173	2952	233	TRUE
16	6974636	6975516	217_NCASD	2175	160	2139	6847	2405	27	8961	316	16	28	TRUE
16	6977258	6978178	218_NCASD	0	0	0	0	0	0	0	0	0	0	FALSE
16	6977703	6978617	219_NCASD	0	0	0	0	0	0	0	0	0	0	FALSE
12	2413760	2414661	22_CACNA1C	100470	117880	71947	94833	62730	95202	118369	90898	66973	66963	TRUE
16	6982102	6982983	220_NCASD	44624	26340	29576	49688	24433	27222	82911	1604	10812	24351	TRUE
16	6983017	6983897	221_NCASD	7037	362	8938	13160	11361	480	576	105	3664	206	TRUE
16	6993389	6994318	222_NCASD	15008	4636	9676	14079	11012	290	855	115	9862	15294	TRUE
16	7006599	7007513	223_NCASD	201041	135975	97088	129203	86714	81542	43144	38016	21965	25621	TRUE
16	7009204	7010099	224_NCASD	10354	18221	7204	19351	10770	16874	49872	798	1555	431	TRUE
16	7009772	7010651	225_NCASD	16199	47584	12161	30329	14294	7064	28764	697	2295	230	TRUE
16	7012729	7013648	226_NCASD	71960	64607	33566	42038	28907	56196	74669	57285	26319	51001	TRUE
16	7013683	7014608	227_NCASD	21457	21667	14643	26721	11551	10875	9336	17649	3596	850	TRUE
16	7016370	7017288	228_NCASD	99990	102095	62132	89501	55622	99906	131069	97746	75939	76385	TRUE
16	7016879	7017793	229_NCASD	97861	104282	55249	86321	53677	128819	126994	113585	87613	87460	TRUE
5	3276493	3277404	23_Epilepsy	113698	112351	69998	92873	60206	79944	84442	62054	24262	25897	TRUE
16	7025447	7026348	230_NCASD	21804	33670	18591	34733	11837	17395	509	205	6715	10830	TRUE
16	7026909	7027834	231_NCASD	33996	52636	21178	33024	21015	24694	32420	55807	19627	16643	TRUE
16	7027924	7028820	232_NCASD	47626	59619	18626	39443	15803	50963	27154	33079	5175	9131	TRUE
21	40644521	40645436	233_NCASD	1414	25170	2152	4506	1260	166	135	14	104	6	TRUE
21	40647507	40648422	234_NCASD	12473	19279	8480	9395	5987	11056	17527	57776	18791	12522	TRUE
21	40652006	40652934	235_NCASD	1566	4695	1272	1849	1327	46	13097	53	2157	70	TRUE
21	40654069	40654987	236_NCASD	75439	60874	43703	72563	40764	75007	81746	62828	35150	61387	TRUE
21	40656128	40657000	237_NCASD	97829	76143	48223	60999	46072	53865	55218	70574	54876	49374	TRUE
21	40657163	40658084	238_NCASD	11931	9523	8826	9722	8877	12504	1728	118	110	82	TRUE
1	111934987	111935886	239_NCASD	0	0	0	0	0	0	0	0	0	0	FALSE
16	4053419	4054333	24_Epilepsy	0	0	0	0	0	0	0	0	0	0	FALSE
3	116029870	116030785	240_NCASD	0	0	0	0	0	0	0	0	0	0	FALSE
3	85836293	85837192	241_NCASD	11898	32297	7934	11516	5972	22725	47001	51514	20035	20136	TRUE
5	88502206	88503123	242_NCASD	19272	45964	13153	31031	16070	12921	24871	18946	36239	17656	TRUE
5	109690976	109691868	243_NCASD	0	0	0	0	0	0	0	0	0	0	FALSE
7	131327410	131328337	244_NCASD	117800	47287	35247	46926	33596	25787	31593	62942	24034	8248	TRUE
10	73850390	73851308	245_NCASD	0	0	0	0	0	0	0	2	0	0	FALSE
12	121794826	121795752	246_NCASD	102003	63084	43857	54758	37688	899	4259	505	7952	389	TRUE
15	98580571	98581480	247_NCASD	70723	66028	37230	49216	35986	103144	113568	118919	112697	109392	TRUE
16	13455334	13456233	248_NCASD	6688	38449	4816	6108	9337	266	215	48	177	9	TRUE
17	40130160	40131066	249_NCASD	29858	9830	18607	33248	15280	14288	26134	347	3763	9987	TRUE
16	8467290	8468207	25_Epilepsy	64895	69787	47340	77186	45288	74284	70086	1332	21235	19909	TRUE
2	166052839	166053729	250_SCN1A	29067	56701	22664	35053	24474	7562	29658	30417	21043	21983	TRUE
21	29557844	29558774	251_Control_Grik1	0	0	0	0	0	0	0	0	0	0	FALSE
6	156953258	156954159	252_Control_Arid1b_1	55965	76945	37604	55951	34873	176415	196086	187689	104958	112541	TRUE
6	157236608	157237526	253_Control_NEG1	10680	3429	7453	8474	4583	115	54	41	5098	15	TRUE
X	25001036	25001967	254_Control_Arx_hs145	142	14	172	92	162	84	62	196	72	114	FALSE
6	97096939	97097862	255_Control_Klhl32_hs676	37838	46756	23181	39484	20647	34390	31845	96370	25017	33573	TRUE
6	157254724	157255632	256_Control_NEG2	0	0	0	0	0	0	0	2	0	2	FALSE
10	101485614	101486514	257_Control_Btrc_hs897	64369	44325	33738	49418	29151	35571	68713	85291	61530	82772	TRUE
X	24999392	25000291	258_Control_Arx_hs122	5807	176674	39546	84723	70499	111801	89577	103031	102681	65842	TRUE
2	166127199	166128139	259_Control_Scn1a	313	15986	646	1096	1703	35661	2647	11738	27720	36611	TRUE
9	10259799	10260728	26_Epilepsy	35366	58333	30191	44973	27933	56174	41297	53018	22107	13292	TRUE
9	973641	974563	260_Control_Dmrt3_hs112	5285	132	5893	14564	1657	102	61	37	2802	22	TRUE
6	156648034	156648964	261_Control_Arid1b_2	0	0	0	0	0	0	0	0	0	0	FALSE
4	54015222	54016135	262_Control_Chic2_hs687	4147	58	3408	4411	1759	37	379	31161	1624	214	TRUE
6	157218059	157218988	263_Control_NEG3	0	0	0	0	0	0	0	0	0	0	FALSE
6	157264812	157265726	264_Control_NEG4	98918	94308	46038	67880	42733	14535	40533	76270	31123	7747	TRUE
7	13466660	13467572	266_Control_Etv1_hs550	68807	83268	31739	50605	32472	139954	191989	152389	61192	58137	TRUE
1	2455211	2456130	267_SZ108	9025	9003	2425	4450	2430	1655	600	6351	205	764	TRUE
1	8362150	8363078	268_SZ108	245011	82967	105664	159660	90272	55402	72388	62796	34141	30866	TRUE
1	29958254	29959169	269_SZ108	191077	116435	79947	99665	55816	40012	31157	2261	30439	30530	TRUE
9	10504801	10505680	27_Epilepsy	34089	59339	28387	47484	20068	27477	68032	100942	94429	87138	TRUE
1	29960634	29961569	270_SZ108	341515	136118	139423	164626	118076	67468	103751	107461	48182	52873	TRUE
1	43633961	43634875	271_SZ108	29231	28674	15711	31470	14320	32581	18300	26956	13903	500	TRUE
1	73302213	73303120	272_SZ108	2730	2622	2639	2193	3244	9642	31	22	42	54	TRUE
1	73358761	73359694	273_SZ108	41424	30310	19569	21236	15471	89682	81474	134779	18454	30027	TRUE
1	98035868	98036764	274_SZ108	2	0	0	0	0	0	0	0	0	6	FALSE
1	98036921	98037835	275_SZ108	11968	34712	9308	11745	11474	18855	19729	62167	3640	13648	TRUE
1	98086836	98087717	276_SZ108	6094	14000	5890	9733	5431	168	110	56	5559	25	TRUE
1	150059075	150059937	277_SZ108	0	0	0	0	0	0	0	0	0	0	FALSE
1	177310517	177311431	278_SZ108	1693	0	66	0	4	2	4	6	0	4	TRUE
1	207803281	207804203	279_SZ108	0	0	0	0	0	0	0	0	0	0	FALSE
3	21677299	21678198	28_Epilepsy	12240	34133	12822	12774	11763	42619	71196	130083	85127	48182	TRUE
1	243381063	243381978	280_SZ108	23285	49748	11782	15299	7933	631	42333	514	8379	325	TRUE
1	243391334	243392273	281_SZ108	61763	34781	24311	38586	23556	34828	27117	34836	8601	15120	TRUE
1	243445210	243446133	282_SZ108	22993	12556	10958	26790	8989	316	34929	241	148	209	TRUE
1	243500129	243501045	283_SZ108	21293	28445	13969	19716	12748	21977	24230	67014	14198	9908	TRUE
2	37365056	37365945	284_SZ108	2546	383	1282	248	1159	89	84	126	77	245	TRUE
2	57759992	57760889	285_SZ108	0	0	0	0	0	0	0	0	0	0	FALSE
2	72133908	72134841	286_SZ108	0	0	0	0	0	0	2	0	2	3	FALSE
2	144383505	144384438	287_SZ108	0	0	0	0	0	0	0	0	0	3	FALSE
2	161988801	161989714	288_SZ108	22948	41724	13507	22698	13807	19778	397	137	382	139	TRUE
2	184736241	184737163	289_SZ108	0	0	0	1	0	0	0	0	0	0	FALSE
15	30605707	30606585	29_Epilepsy	111345	63024	57115	78407	38202	30922	44873	7587	17596	9754	TRUE
2	184946986	184947911	290_SZ108	0	1	0	0	0	0	0	1	0	0	FALSE
2	192983147	192984037	291_SZ108	9422	5698	9263	6248	5419	41713	44023	68791	23618	33875	TRUE
2	193119461	193120365	292_SZ108	4794	26265	4002	2961	4209	5010	16473	425	3840	2918	TRUE
2	197439405	197440319	293_SZ108	0	0	0	0	0	0	0	0	0	2	FALSE
2	199299072	199299987	294_SZ108	58733	73181	31342	33912	33438	74337	92562	58796	20107	29397	TRUE
2	199850397	199851296	295_SZ108	0	0	0	0	0	0	0	0	0	0	FALSE
2	224526121	224527035	296_SZ108	15226	6105	7904	12112	9020	123	160	69	56	5767	TRUE
2	232727342	232728260	297_SZ108	3928	22151	3697	7850	4306	247	169	46	14533	8	TRUE
2	232877933	232878857	298_SZ108	76454	65501	30706	54784	32779	34166	11860	654	6587	8750	TRUE
2	235886259	235887169	299_SZ108	25957	10319	17230	33630	23849	48569	53623	562	18407	14402	TRUE
12	2224342	2225256	3_CACNA1C	81110	69709	52498	80739	41939	209591	256817	196573	151231	154793	TRUE
4	31149273	31150190	30_Epilepsy	0	1	6	1	5	0	2	0	0	4	FALSE
3	2505639	2506540	300_SZ108	3424	13464	3358	6983	3479	40008	32417	376	3873	9361	TRUE
3	17817730	17818611	301_SZ108	428290	96298	150699	198837	128823	45896	100764	65009	39915	19115	TRUE
3	36816623	36817561	302_SZ108	80579	66104	28875	42718	31055	24013	30050	50054	22109	4657	TRUE
3	36821035	36821949	303_SZ108	91028	65457	31707	57917	28762	32338	80380	1182	16839	22946	TRUE
3	36822547	36823461	304_SZ108	152881	91767	86105	98049	68684	45764	17009	52524	29781	16590	TRUE
3	52803927	52804853	305_SZ108	143918	92376	55545	78391	50928	40501	41259	1532	24590	14076	TRUE
3	52810634	52811552	306_SZ108	6879	277	8525	7421	8703	6366	133	124	6975	77	TRUE
3	52820769	52821683	307_SZ108	65437	31914	11293	13456	9737	2669	6738	321	345	607	TRUE
3	62078649	62079563	308_SZ108	25738	39063	13967	17247	15534	71555	98888	35977	17619	41964	TRUE
3	63846908	63847807	309_SZ108	0	0	0	0	0	0	0	0	0	0	FALSE
1	34284870	34285786	31_Epilepsy	0	0	0	0	0	0	0	0	0	0	FALSE
3	136569094	136570012	310_SZ108	369	46	547	139	499	5455	12	16	12	34	TRUE
3	180832982	180833896	311_SZ108	11363	40405	7568	8713	6896	14301	19081	33334	14366	23915	TRUE
3	181449365	181450264	312_SZ108	75448	45463	33267	40614	40375	10146	783	426	10853	1241	TRUE
4	23421551	23422450	313_SZ108	6685	24675	6927	8475	8796	46192	48911	47752	23980	14242	TRUE
4	102225069	102225997	314_SZ108	6015	31774	6980	9777	5589	306	225	53	855	4769	TRUE
4	169704947	169705861	315_SZ108	3957	6767	3294	1202	3049	70	18519	85	1319	92	TRUE
4	175939834	175940714	316_SZ108	3538	298	4344	4496	5942	71	1186	56711	71	1567	TRUE
5	45364110	45365019	317_SZ108	4583	13417	4392	12614	7401	495	1298	133	9913	25473	TRUE
5	61202872	61203761	318_SZ108	64	0	0	0	0	0	0	0	0	0	FALSE
5	61302260	61303179	319_SZ108	90750	52872	39166	66951	41617	42368	64910	1980	52481	73239	TRUE
17	48045184	48046100	32_Epilepsy	187	29	252	14	134	3773	3293	16	122	990	FALSE
5	89450258	89451168	320_SZ108	4555	932	3761	4936	3079	15061	7653	1394	3267	820	TRUE
5	102433554	102434476	321_SZ108	0	0	0	0	0	0	0	0	0	2	FALSE
5	109699910	109700824	322_SZ108	0	0	0	0	0	0	0	0	0	0	FALSE
5	138515035	138515950	323_SZ108	0	0	0	0	0	0	0	0	0	0	FALSE
5	152797126	152798008	324_SZ108	0	0	0	0	0	0	0	0	0	0	FALSE
5	153160324	153161250	325_SZ108	0	0	0	0	0	0	0	0	0	0	FALSE
5	153274467	153275381	326_SZ108	0	0	0	0	0	0	0	0	0	0	FALSE
5	154300729	154301643	327_SZ108	2	3	4	0	1	0	2	19	0	0	FALSE
6	30205897	30206823	328_SZ108	0	0	0	0	0	0	0	0	0	0	FALSE
6	72445742	72446662	329_SZ108	0	2	0	0	2	0	9	5	0	0	FALSE
4	46237811	46238703	33_Epilepsy	2663	18909	3092	3770	5865	161	4550	90	638	3137	TRUE
6	96011317	96012231	330_SZ108	1715	62	2368	2148	3709	20	125	54	186	3088	TRUE
7	1977396	1978280	331_SZ108	8354	5158	8596	2519	7118	15195	21734	146	4088	13535	TRUE
7	72285863	72286783	332_SZ108	107825	86311	43511	63290	46229	54736	106630	83614	86989	110712	TRUE
7	86797848	86798747	333_SZ108	103607	81467	48431	79247	48532	57469	77861	28388	20959	28390	TRUE
7	105288162	105289076	334_SZ108	8739	190	5808	9761	4776	227	17962	1952	102	25038	TRUE
7	110408568	110409458	335_SZ108	8779	3435	7587	12354	6162	15291	146	126	398	68	TRUE
7	111258107	111259001	336_SZ108	19186	14314	12411	20206	15664	20668	942	44206	5715	10812	TRUE
7	131882035	131882954	337_SZ108	30141	15639	20022	29220	17106	59559	52421	49995	27029	21497	TRUE
7	137389636	137390558	338_SZ108	4663	154	3226	12104	1208	49	18	25	28	53	TRUE
8	4322853	4323790	339_SZ108	23608	32004	14296	24422	14059	17122	18521	462	4298	320	TRUE
6	52970635	52971541	34_Epilepsy	178847	142209	121914	159288	94405	48185	35579	2354	18988	28030	TRUE
8	27584143	27585074	340_SZ108	57093	11691	14456	25502	13916	33931	47924	33065	10244	8780	TRUE
8	59787443	59788363	341_SZ108	649	98	1709	4052	3865	9107	18	32	55	22	TRUE
8	88575834	88576744	342_SZ108	53	3	3	2	8	0	6	69	24	9	FALSE
8	88579388	88580264	343_SZ108	7730	74	2283	4503	3398	65	21	15	347	16	TRUE
8	88747617	88748531	344_SZ108	7771	26103	6291	8735	6863	9069	26184	22980	8091	3389	TRUE
8	110473090	110473989	345_SZ108	905	145	1500	6833	673	36	25626	391	12	142	TRUE
8	142231111	142232026	346_SZ108	238008	82291	81594	111037	69875	28861	66463	51031	26115	42278	TRUE
9	82124617	82125496	347_SZ108	11604	38582	10852	17434	11237	19802	9033	162	4755	189	TRUE
10	18445129	18446067	348_SZ108	7866	12702	4871	11408	4134	278	524	37246	12349	354	TRUE
10	18455914	18456799	349_SZ108	153827	86018	71717	104534	77258	80779	80778	56966	39723	21337	TRUE
2	57706565	57707464	35_Epilepsy	9745	32793	11051	22509	12006	23867	31844	64298	3568	9010	TRUE
10	60586432	60587311	350_SZ108	28590	12450	16540	27927	15911	50563	67548	72481	45005	31189	TRUE
10	102852022	102852943	351_SZ108	0	0	0	0	0	0	0	0	0	0	FALSE
10	102868892	102869781	352_SZ108	0	0	0	0	0	0	0	0	0	0	FALSE
10	103015702	103016611	353_SZ108	94	0	4	20	0	0	0	0	0	0	FALSE
10	103145987	103146914	354_SZ108	743	50	573	761	3843	24	6	10	3226	4	TRUE
11	17138139	17139062	355_SZ108	9844	35891	8269	14401	7631	337	239	105	200	27	TRUE
11	24381604	24382531	356_SZ108	5192	168	4876	13962	4721	104	13389	155	40	67	TRUE
11	57742362	57743253	357_SZ108	15537	14170	12172	29314	15730	444	13063	263	455	7649	TRUE
11	109506775	109507685	358_SZ108	28469	28271	16796	29563	18968	27655	35693	57124	5455	3687	TRUE
11	113521828	113522742	359_SZ108	2242	114	2116	3061	527	16640	120	111	61	75	TRUE
2	57832206	57833105	36_Epilepsy	0	0	0	0	0	0	0	0	0	0	FALSE
11	123523273	123524184	360_SZ108	853	85	614	2835	1738	2294	7799	78	20	52	TRUE
11	124743591	124744490	361_SZ108	8967	18232	6369	7807	5377	13651	264	101	115	16162	TRUE
11	125591561	125592470	362_SZ108	271823	155273	122845	156221	103188	48891	100127	57811	40258	28669	TRUE
11	130848273	130849192	363_SZ108	15369	38234	15892	25795	19102	54237	55831	30800	10306	20941	TRUE
11	130947231	130948150	364_SZ108	14381	12906	10538	11854	16470	359	31905	423	22271	12754	TRUE
11	130960395	130961278	365_SZ108	29303	37861	22018	34939	21781	33063	83103	2578	31409	60187	TRUE
11	133952208	133953144	366_SZ108	124392	56301	46490	64580	38674	878	1211	23304	15713	612	TRUE
12	29763863	29764783	367_SZ108	30407	54609	19967	29284	18616	64981	60362	44247	27819	34941	TRUE
12	57228331	57229233	368_SZ108	6215	10605	5852	11537	5079	6033	337	99	2745	15070	TRUE
12	91852556	91853475	369_SZ108	1760	1973	1138	1258	985	30	43	16	18	3291	TRUE
2	57867273	57868196	37_Epilepsy	6961	32340	6036	5591	10569	264	311	82	164	46	TRUE
12	103202214	103203142	370_SZ108	41177	79288	25647	37384	23444	9963	19761	444	5231	229	TRUE
12	110284972	110285909	371_SZ108	0	0	0	0	0	1	0	2	0	0	FALSE
12	123180120	123181034	372_SZ108	18015	32484	10137	21909	10628	19984	36504	29672	24100	25449	TRUE
12	123246454	123247346	373_SZ108	5203	9777	5294	5186	2590	10842	86	70	104	51	TRUE
14	29720944	29721853	374_SZ108	9378	709	6782	8344	6007	25423	37146	383	12533	5276	TRUE
14	71950040	71950939	375_SZ108	36359	20164	15111	24277	16994	674	23588	85145	26663	10030	TRUE
14	99252434	99253352	376_SZ108	93843	72122	45770	81466	43850	18934	34102	64537	946	11209	TRUE
14	103580055	103580945	377_SZ108	8895	1070	10085	9547	5750	90	277	59	3373	6340	TRUE
15	40274572	40275451	378_SZ108	26244	25644	20940	26333	20031	432	268	379	12094	151	TRUE
15	40302972	40303896	379_SZ108	0	0	0	0	0	0	0	0	0	0	FALSE
4	61586733	61587606	38_Epilepsy	16055	30684	15175	20697	15268	8454	11200	23598	7011	5984	TRUE
15	61547458	61548372	380_SZ108	51938	51697	27308	41555	28392	40318	53463	33320	11705	880	TRUE
15	61562368	61563283	381_SZ108	126395	108545	63867	76818	51420	91202	99972	63612	43672	67178	TRUE
15	70296486	70297400	382_SZ108	106790	100974	45291	55204	37175	13748	98808	89572	42675	46260	TRUE
15	78615223	78616140	383_SZ108	478	84	418	154	388	168	249	667	204	319	TRUE
15	84037243	84038164	384_SZ108	118664	86435	50903	63030	52852	49497	60985	35569	25434	9197	TRUE
15	90882901	90883800	385_SZ108	0	0	0	0	0	0	0	0	0	0	FALSE
16	9851997	9852923	386_SZ108	63652	23754	24401	44710	23740	619	1083	40406	5445	17139	TRUE
16	13655540	13656472	387_SZ108	2889	380	2283	6553	2569	31976	668	24387	5955	409	TRUE
16	29928104	29929023	388_SZ108	0	0	0	0	0	0	0	0	0	0	FALSE
16	58647080	58647959	389_SZ108	0	0	0	0	0	0	0	0	0	0	FALSE
5	66855665	66856583	39_Epilepsy	135262	138959	90383	125924	84966	61603	87573	55732	24829	37619	TRUE
16	68154974	68155888	390_SZ108	15681	959	9190	19654	11745	24160	11552	308	3725	248	TRUE
17	2305135	2306042	391_SZ108	0	0	0	0	0	0	0	0	0	0	FALSE
17	18054620	18055537	392_SZ108	31245	23862	24634	21388	17078	39309	39962	540	419	479	TRUE
18	55084316	55085231	393_SZ108	17963	25761	10763	16188	12632	25957	55853	36521	6148	13939	TRUE
18	55085098	55086023	394_SZ108	58521	59098	24923	41699	26630	67382	89706	64812	16040	33194	TRUE
18	55527265	55528179	395_SZ108	16772	15276	8674	12238	10980	58117	74731	2135	38789	34053	TRUE
18	55532428	55533347	396_SZ108	15539	439	10465	13590	10780	272	17562	109242	17579	1964	TRUE
18	55865502	55866391	397_SZ108	7006	21439	5744	11548	9055	16869	333	163	3781	13522	TRUE
19	19362168	19363057	398_SZ108	16617	12645	9779	30111	3316	165	83	124	93	26	TRUE
19	19366747	19367661	399_SZ108	153832	78043	72594	115776	67504	63116	64781	27614	28407	15059	TRUE
12	2231465	2232384	4_CACNA1C	15355	45321	14817	28434	17707	15218	13097	26637	4649	15840	TRUE
6	79854400	79855269	40_Epilepsy	28152	31822	23593	40446	22715	48808	99565	98102	28663	34051	TRUE
19	30496066	30496981	400_SZ108	0	0	0	0	0	0	0	0	0	0	FALSE
19	49587302	49588212	401_SZ108	1052	6	1010	2	483	5	0	1	2	4	TRUE
20	38824087	38824987	402_SZ108	0	0	0	0	0	0	0	0	0	0	FALSE
20	49514036	49514953	403_SZ108	132516	77019	60716	79305	55084	22392	34159	1321	10867	11144	TRUE
22	41191088	41191992	404_SZ108	1002	10782	1303	2371	1988	76	45	19	29	4	TRUE
22	42207373	42208252	405_SZ108	348	2	14	337	0	0	0	2	0	0	TRUE
X	6111034	6111949	406_SZ108	3459	11967	2596	6071	2196	12361	19309	29426	1770	417	TRUE
X	21361587	21362490	407_SZ108	26912	49553	17195	25370	17584	32233	20932	41746	7792	15318	TRUE
X	69156818	69157732	408_SZ108	4	2	4	4	8	0	0	1	0	0	FALSE
9	85314768	85315672	41_Epilepsy	132392	136213	74668	108529	70837	28186	47573	40134	28135	30374	TRUE
11	102724045	102724959	42_Epilepsy	11002	50633	11616	15211	14314	10626	8918	24470	9933	18212	TRUE
5	114932434	114933335	43_Epilepsy	1650	2877	2881	3686	2645	36	113	48	31	34	TRUE
2	144602114	144602995	44_Epilepsy	20793	70287	22460	29068	21558	37476	31904	39214	7336	2465	TRUE
1	145789010	145789935	45_Epilepsy	17174	35203	11478	16603	10941	21404	656	23332	249	4928	TRUE
4	149803806	149804720	46_Epilepsy	20079	35031	20685	35198	18848	54489	89735	50131	36605	12904	TRUE
2	165961460	165962359	47_SCN1A	0	0	0	0	0	0	2	12	0	0	FALSE
2	165969665	165970554	48_SCN1A	1476	62	910	1216	1681	14	8994	40	3270	26	TRUE
2	165972108	165973025	49_SCN1A	144478	117542	67116	92211	54791	2826	27868	2092	16093	9275	TRUE
12	2235350	2236252	5_CACNA1C	169854	115719	119706	142282	99854	119701	175148	130573	94855	84552	TRUE
2	165974551	165975432	50_SCN1A	0	0	6	6	12	2	2	4	0	0	FALSE
2	165977272	165978174	51_SCN1A	0	0	0	0	0	0	0	0	0	0	FALSE
2	165980880	165981764	52_SCN1A	2291	12277	2949	3032	4404	14224	33381	38541	3443	14505	TRUE
2	165982655	165983572	53_SCN1A	4276	169	3398	10310	5026	9214	5610	42820	5751	438	TRUE
2	165988146	165989036	54_SCN1A	131779	105901	75874	107816	66251	56293	94928	101384	36774	21512	TRUE
2	165996386	165997255	55_SCN1A	4342	22	2126	1371	3291	39	30	32	22	2718	TRUE
2	166000177	166001091	56_SCN1A	7225	35369	7797	11381	12698	41825	48889	590	4338	14793	TRUE
2	166001418	166002339	57_SCN1A	3771	7901	7164	12920	9928	4796	627	67	167	22	TRUE
2	166004510	166005424	58_SCN1A	18251	42339	16129	25281	18522	41806	97604	36149	13741	27142	TRUE
2	166010959	166011862	59_SCN1A	11571	22308	11839	24056	12215	16933	40082	27110	7141	895	TRUE
12	2236981	2237909	6_CACNA1C	44690	41207	32593	67022	28690	143286	133549	135856	78476	64470	TRUE
2	166015235	166016124	60_SCN1A	21954	27019	14028	18736	12997	9612	5734	79255	28473	29831	TRUE
2	166016324	166017213	61_SCN1A	8609	40663	7963	11125	9565	27455	35950	66096	7832	12225	TRUE
2	166019858	166020786	62_SCN1A	14823	46137	11181	20960	15278	22372	14326	294	1342	2444	TRUE
2	166024929	166025828	63_SCN1A	93919	105677	81424	110003	78583	101827	128378	106730	89062	100572	TRUE
2	166026339	166027209	64_SCN1A	2049	7762	3469	8468	3457	3186	99	106	107	39	TRUE
2	166029147	166030062	65_SCN1A	71603	63252	40866	56405	42272	34289	44140	83877	14905	7918	TRUE
2	166030013	166030928	66_SCN1A	19113	47165	16988	21936	15786	20714	25664	63458	6489	15139	TRUE
2	166031554	166032444	67_SCN1A	4525	10788	2491	4070	4244	2512	9545	69	627	7351	TRUE
2	166032276	166033176	68_SCN1A	5677	10255	4976	7052	6905	9264	2482	95	263	6800	TRUE
2	166033277	166034165	69_SCN1A	2928	6915	3304	2593	1766	76	4754	61051	978	4832	TRUE
12	2239587	2240506	7_CACNA1C	83574	64336	43462	59780	40665	175643	208446	143173	107054	81999	TRUE
2	166035747	166036664	70_SCN1A	0	0	0	0	0	0	0	0	2	1	FALSE
2	166036864	166037781	71_SCN1A	29316	53503	26839	32919	27480	26463	52683	105500	63297	85202	TRUE
2	166037079	166037968	72_SCN1A	36519	60775	34363	41032	34486	32928	55493	96136	70546	86084	TRUE
2	166038489	166039387	73_SCN1A	57878	64503	43677	53166	42058	59098	47162	85581	24507	23932	TRUE
2	166037914	166038821	74_SCN1A	70656	67494	53790	61191	49372	56563	47926	51126	35610	23963	TRUE
2	166039448	166040364	75_SCN1A	5613	1279	6545	16092	9731	9793	66	29	132	50	TRUE
2	166040571	166041470	76_SCN1A	2103	182	2744	7586	2107	156	6899	82	94	8462	TRUE
2	166041211	166042110	77_SCN1A	3317	313	4275	12030	3640	186	7648	122	123	8360	TRUE
2	166042526	166043425	78_SCN1A	8255	31099	7819	12342	10199	10337	67734	32546	6616	7953	TRUE
2	166043860	166044759	79_SCN1A	15523	14694	13067	29940	14316	13092	8610	148	242	166	TRUE
12	2246175	2247090	8_CACNA1C	259106	142442	161618	197169	135120	162531	198870	123004	113549	95501	TRUE
2	166045026	166045944	80_SCN1A	15901	9270	17012	28613	16855	9156	27853	95572	15441	6003	TRUE
2	166046791	166047706	81_SCN1A	50233	72854	36344	47621	36373	62362	89300	94420	22829	33886	TRUE
2	166047085	166047969	82_SCN1A	47659	67315	35601	46088	36068	58457	82577	86658	23451	34594	TRUE
2	166048436	166049307	83_SCN1A	4767	418	5741	6278	7946	2949	29744	42941	5132	11690	TRUE
2	166050208	166051077	84_SCN1A	850	2134	2097	2580	2307	6177	6451	19743	4010	412	TRUE
2	166051026	166051925	85_SCN1A	620	10135	1076	1589	2834	9559	7929	2724	2947	1453	TRUE
2	166052439	166053360	86_SCN1A	25712	49410	20785	32428	24280	10069	34762	47364	17213	15576	TRUE
2	166053744	166054661	87_SCN1A	19228	27316	13680	21926	13637	16370	42801	118768	22938	31100	TRUE
2	166054817	166055718	88_SCN1A	1632	2941	2977	3975	1899	9691	8930	39821	2710	2733	TRUE
2	166056813	166057729	89_SCN1A	5448	593	6429	10590	6728	9294	7984	210	720	2735	TRUE
12	2251835	2252754	9_CACNA1C	117927	115668	87962	114920	79944	162167	164249	120404	113610	117632	TRUE
2	166058686	166059605	90_SCN1A	7893	17863	7454	9277	6592	278	7454	32853	2133	11669	TRUE
2	166060150	166061064	91_SCN1A	93117	103850	47931	61219	40701	33301	24124	69843	34270	21372	TRUE
2	166063934	166064823	92_SCN1A	2984	13719	3911	2824	6952	5744	23076	5266	3622	2735	TRUE
2	166068317	166069206	93_SCN1A	11486	35701	10082	19423	9225	652	17669	25587	11089	4011	TRUE
2	166069486	166070365	94_SCN1A	2	4	0	1	360	0	0	0	0	0	FALSE
2	166084702	166085619	95_SCN1A	95392	94129	64263	94507	58701	238601	259478	226288	173594	169328	TRUE
2	166086676	166087594	96_SCN1A	128049	120664	87549	116696	70452	150626	225115	111662	87991	80169	TRUE
2	166088489	166089389	97_SCN1A	267	165	64	2	74	2043	865	4681	100	220	TRUE
2	166093542	166094413	98_SCN1A	36929	43802	21240	33175	20399	701	17630	289	7253	273	TRUE
2	166098335	166099204	99_SCN1A	61000	61173	27818	37341	24487	2004	64494	106689	62243	79263	TRUE
