# Supplementary material for: Parallel functional testing identifies enhancers active in early postnatal mouse brain
Source: eLife journal article supplement (doi:10.7554/elife.69479), 2021-10-04
Supplement: supp [file elife-69479-supp-v1.zip › elife_poa_e69479_Supplementary_file_5.csv]

Amp_number	Amp_name	Group	Residuals_Z_scaled_to_lm	Pvalue	DNase_Roadmap	H3K27me3_Roadmap	H3K36me3_Roadmap	H3K4me1_Roadmap	H3K4me3_Roadmap	H3K9me3_Roadmap	Fetal.Brain.TF.Footprints_BOCA	Fetal.Lung.TF.Footprints_BOCA	K562.cells.TF.Footprints_BOCA	ATAC.seq..Human.Neurons_BOCA	ATAC.seq..Human.Glia_BOCA	Conserved.Element_BOCA
1	1_LD	LD	-0.371952096703186	0.645035742110452	FALSE	FALSE	FALSE	FALSE	FALSE	FALSE	FALSE	FALSE	FALSE	FALSE	FALSE	TRUE
10	10_LD	LD	0.191885509186308	0.423915944257166	FALSE	FALSE	FALSE	FALSE	FALSE	FALSE	TRUE	TRUE	FALSE	FALSE	FALSE	TRUE
100	100_LD	LD	0.79590001627228	0.213045075901939	TRUE	FALSE	FALSE	FALSE	FALSE	FALSE	TRUE	FALSE	FALSE	FALSE	FALSE	TRUE
101	101_LD	LD	-1.32173026131972	0.906871005967081	FALSE	FALSE	FALSE	FALSE	FALSE	FALSE	FALSE	FALSE	FALSE	TRUE	FALSE	TRUE
102	102_LD	LD	-0.46173960493725	0.677865967024714	FALSE	FALSE	FALSE	FALSE	FALSE	FALSE	FALSE	FALSE	FALSE	TRUE	FALSE	FALSE
103	103_LD	LD	0.56659915358553	0.28549327508253	FALSE	FALSE	FALSE	FALSE	FALSE	FALSE	FALSE	FALSE	FALSE	FALSE	FALSE	TRUE
105	105_LD	LD	-5.24706283884472	0.999999922728401	FALSE	FALSE	FALSE	FALSE	FALSE	FALSE	FALSE	FALSE	FALSE	FALSE	FALSE	FALSE
106	106_LD	LD	-2.68941979667049	0.996421182774819	FALSE	FALSE	FALSE	FALSE	FALSE	FALSE	FALSE	FALSE	FALSE	FALSE	FALSE	TRUE
108	108_LD	LD	1.68624537858104	0.0458742734184788	FALSE	FALSE	FALSE	FALSE	FALSE	FALSE	FALSE	FALSE	FALSE	FALSE	FALSE	FALSE
109	109_LD	LD	-3.41177152667019	0.999677289073905	FALSE	FALSE	FALSE	FALSE	FALSE	FALSE	FALSE	FALSE	FALSE	FALSE	FALSE	TRUE
11	11_LD	LD	0.742957432822314	0.228753726148727	FALSE	FALSE	FALSE	FALSE	FALSE	FALSE	FALSE	FALSE	FALSE	FALSE	FALSE	TRUE
110	110_LD	LD	-1.8751919302894	0.969616838029241	FALSE	FALSE	FALSE	FALSE	FALSE	FALSE	FALSE	FALSE	FALSE	FALSE	FALSE	TRUE
111	111_LD	LD	0.454293213528322	0.324808899992546	FALSE	FALSE	FALSE	FALSE	FALSE	FALSE	FALSE	FALSE	FALSE	FALSE	FALSE	FALSE
112	112_LD	LD	-1.5854978364722	0.943573365952367	TRUE	FALSE	FALSE	FALSE	FALSE	FALSE	FALSE	FALSE	FALSE	TRUE	FALSE	TRUE
113	113_LD	LD	0.073107512296623	0.470860281854737	FALSE	FALSE	FALSE	FALSE	FALSE	FALSE	FALSE	FALSE	FALSE	FALSE	FALSE	FALSE
114	114_LD	LD	0.138854857410936	0.444782421934079	FALSE	FALSE	FALSE	FALSE	FALSE	FALSE	FALSE	TRUE	FALSE	FALSE	FALSE	TRUE
115	115_LD	LD	0.643228880348248	0.260037798087949	FALSE	FALSE	FALSE	FALSE	FALSE	FALSE	FALSE	FALSE	FALSE	FALSE	FALSE	TRUE
116	116_GWAS	GWAS	4.16329204400082	1.56845862829432e-05	FALSE	FALSE	FALSE	FALSE	FALSE	FALSE	FALSE	FALSE	FALSE	FALSE	FALSE	FALSE
117	117_GWAS	GWAS	0.719140629550875	0.236027137886813	FALSE	FALSE	FALSE	FALSE	FALSE	FALSE	FALSE	FALSE	FALSE	FALSE	FALSE	FALSE
118	118_GWAS	GWAS	0.539563943315284	0.294748894109563	FALSE	FALSE	FALSE	FALSE	FALSE	FALSE	FALSE	FALSE	FALSE	FALSE	FALSE	TRUE
119	119_GWAS	GWAS	-4.68021058468168	0.99999856709799	FALSE	FALSE	TRUE	FALSE	FALSE	FALSE	FALSE	FALSE	FALSE	TRUE	FALSE	TRUE
12	12_LD	LD	-0.258703097213285	0.602067835164878	FALSE	FALSE	FALSE	FALSE	FALSE	FALSE	FALSE	FALSE	FALSE	FALSE	FALSE	TRUE
120	120_GWAS	GWAS	-0.0646515420020351	0.525774277033768	FALSE	FALSE	FALSE	TRUE	FALSE	FALSE	FALSE	FALSE	FALSE	FALSE	FALSE	TRUE
121	121_FBDHS	FBDHS	2.23261573917313	0.0127871476411639	TRUE	FALSE	FALSE	TRUE	TRUE	FALSE	TRUE	FALSE	FALSE	TRUE	FALSE	TRUE
122	122_FBDHS	FBDHS	4.28582754907648	9.10300902938337e-06	TRUE	FALSE	FALSE	TRUE	FALSE	FALSE	TRUE	TRUE	FALSE	FALSE	TRUE	TRUE
123	123_FBDHS	FBDHS	-1.74184460386414	0.959232180281933	TRUE	FALSE	FALSE	TRUE	FALSE	FALSE	TRUE	FALSE	FALSE	FALSE	FALSE	TRUE
124	124_FBDHS	FBDHS	0.648847525048131	0.258218467728612	TRUE	FALSE	FALSE	TRUE	FALSE	FALSE	TRUE	TRUE	FALSE	FALSE	FALSE	FALSE
125	125_FBDHS	FBDHS	0.423214488248547	0.336069388532317	TRUE	FALSE	FALSE	TRUE	FALSE	FALSE	FALSE	TRUE	FALSE	FALSE	FALSE	FALSE
126	126_FBDHS	FBDHS	-0.183831172106507	0.572927049474451	TRUE	FALSE	FALSE	FALSE	FALSE	FALSE	TRUE	TRUE	TRUE	TRUE	TRUE	TRUE
127	127_FBDHS	FBDHS	1.8945963674538	0.0290729482101231	FALSE	FALSE	FALSE	FALSE	FALSE	FALSE	FALSE	FALSE	FALSE	FALSE	TRUE	TRUE
128	128_FBDHS	FBDHS	-0.653132380318589	0.743164530597526	TRUE	FALSE	FALSE	TRUE	FALSE	FALSE	TRUE	FALSE	FALSE	TRUE	FALSE	FALSE
129	129_FBDHS	FBDHS	0.556131129158676	0.28906060804401	FALSE	FALSE	FALSE	FALSE	FALSE	FALSE	FALSE	FALSE	FALSE	FALSE	FALSE	FALSE
13	13_LD	LD	-2.28217019908035	0.988760353106814	FALSE	FALSE	FALSE	FALSE	FALSE	FALSE	FALSE	FALSE	FALSE	FALSE	FALSE	TRUE
130	130_FBDHS	FBDHS	-0.343485136641852	0.634383239655764	FALSE	FALSE	FALSE	FALSE	FALSE	FALSE	FALSE	FALSE	FALSE	FALSE	FALSE	TRUE
131	131_FBDHS	FBDHS	2.24112441201824	0.0125090086565946	TRUE	FALSE	FALSE	FALSE	FALSE	FALSE	FALSE	FALSE	FALSE	FALSE	FALSE	TRUE
132	132_FBDHS	FBDHS	-0.295558885603597	0.616216511998051	TRUE	FALSE	FALSE	FALSE	FALSE	FALSE	TRUE	FALSE	FALSE	FALSE	FALSE	TRUE
134	134_FBDHS	FBDHS	2.04488431493284	0.0204331323175325	TRUE	FALSE	FALSE	TRUE	FALSE	FALSE	TRUE	TRUE	FALSE	TRUE	TRUE	TRUE
135	135_FBDHS	FBDHS	-0.349828369310766	0.636766246482166	FALSE	FALSE	FALSE	FALSE	FALSE	FALSE	FALSE	TRUE	FALSE	FALSE	FALSE	TRUE
136	136_FBDHS	FBDHS	0.823021124504808	0.205247990334265	TRUE	FALSE	FALSE	TRUE	FALSE	FALSE	TRUE	FALSE	FALSE	TRUE	FALSE	TRUE
137	137_FBDHS	FBDHS	2.14558417742149	0.0159530844620037	FALSE	FALSE	FALSE	TRUE	FALSE	FALSE	FALSE	FALSE	FALSE	FALSE	FALSE	TRUE
138	138_FBDHS	FBDHS	0.0481783561996755	0.480787049701834	TRUE	FALSE	FALSE	TRUE	FALSE	FALSE	FALSE	TRUE	FALSE	FALSE	FALSE	TRUE
139	139_FBDHS	FBDHS	0.354946632560662	0.361314786158056	TRUE	FALSE	FALSE	TRUE	FALSE	FALSE	TRUE	TRUE	FALSE	TRUE	FALSE	TRUE
14	14_LD	LD	-1.15467248198978	0.875887713795752	FALSE	FALSE	FALSE	TRUE	FALSE	FALSE	FALSE	FALSE	FALSE	FALSE	FALSE	TRUE
140	140_FBDHS	FBDHS	1.37109752975281	0.085172277468384	TRUE	FALSE	FALSE	TRUE	FALSE	FALSE	TRUE	FALSE	FALSE	TRUE	FALSE	TRUE
141	141_FBDHS	FBDHS	-0.452720955870656	0.674625156133326	TRUE	FALSE	FALSE	TRUE	FALSE	FALSE	TRUE	FALSE	FALSE	TRUE	FALSE	TRUE
142	142_FBDHS	FBDHS	-0.574697743959818	0.717252133243443	TRUE	FALSE	FALSE	TRUE	FALSE	FALSE	TRUE	FALSE	FALSE	TRUE	FALSE	TRUE
143	143_FBDHS	FBDHS	2.07965207643948	0.0187787283585352	FALSE	FALSE	FALSE	FALSE	FALSE	FALSE	TRUE	FALSE	FALSE	FALSE	FALSE	TRUE
144	144_FBDHS	FBDHS	2.41743140628024	0.00781523983669115	TRUE	FALSE	FALSE	FALSE	FALSE	FALSE	FALSE	FALSE	FALSE	FALSE	FALSE	FALSE
146	146_FBDHS	FBDHS	-0.944656858686786	0.827582955640972	TRUE	FALSE	FALSE	TRUE	TRUE	FALSE	TRUE	TRUE	FALSE	TRUE	TRUE	TRUE
147	147_FBDHS	FBDHS	-0.202733340332078	0.580328268775123	TRUE	FALSE	FALSE	TRUE	TRUE	FALSE	TRUE	FALSE	FALSE	FALSE	FALSE	TRUE
148	148_FBDHS	FBDHS	0.900993561857254	0.183795871401465	TRUE	FALSE	FALSE	TRUE	TRUE	FALSE	FALSE	FALSE	FALSE	FALSE	FALSE	TRUE
149	149_FBDHS	FBDHS	3.3073701484115	0.00047088181025419	TRUE	FALSE	FALSE	TRUE	TRUE	FALSE	TRUE	FALSE	FALSE	TRUE	FALSE	TRUE
15	15_LD	LD	0.300904890046962	0.381743510659193	FALSE	FALSE	FALSE	FALSE	FALSE	FALSE	FALSE	FALSE	FALSE	FALSE	FALSE	TRUE
150	150_FBDHS	FBDHS	1.90534777537326	0.0283674395156685	TRUE	FALSE	FALSE	FALSE	TRUE	FALSE	FALSE	FALSE	FALSE	FALSE	FALSE	TRUE
151	151_FBDHS	FBDHS	1.26239797461077	0.103402808833962	TRUE	FALSE	FALSE	TRUE	TRUE	FALSE	FALSE	TRUE	FALSE	FALSE	FALSE	TRUE
152	152_FBDHS	FBDHS	0.471402926439377	0.318676513283564	TRUE	FALSE	FALSE	TRUE	TRUE	FALSE	FALSE	FALSE	FALSE	FALSE	FALSE	FALSE
153	153_FBDHS	FBDHS	0.596527641269189	0.275411396952142	FALSE	FALSE	FALSE	TRUE	TRUE	FALSE	FALSE	FALSE	FALSE	FALSE	FALSE	TRUE
154	154_FBDHS	FBDHS	1.68117774791754	0.046364197174322	FALSE	FALSE	FALSE	TRUE	TRUE	FALSE	FALSE	FALSE	FALSE	FALSE	TRUE	TRUE
155	155_FBDHS	FBDHS	0.646202194488854	0.259074209265022	FALSE	FALSE	TRUE	TRUE	TRUE	FALSE	FALSE	FALSE	FALSE	FALSE	FALSE	TRUE
156	156_FBDHS	FBDHS	1.48448581853747	0.0688400413260787	FALSE	FALSE	FALSE	FALSE	FALSE	FALSE	FALSE	FALSE	FALSE	TRUE	FALSE	FALSE
157	157_FBDHS	FBDHS	-0.124574373293943	0.549569741262468	FALSE	FALSE	TRUE	FALSE	FALSE	FALSE	FALSE	FALSE	FALSE	FALSE	FALSE	TRUE
158	158_FBDHS	FBDHS	0.463067062042386	0.321658149308078	TRUE	FALSE	TRUE	TRUE	FALSE	FALSE	FALSE	FALSE	FALSE	FALSE	FALSE	TRUE
159	159_FBDHS	FBDHS	1.71823562220763	0.0428768232447264	TRUE	FALSE	FALSE	TRUE	TRUE	FALSE	TRUE	FALSE	FALSE	TRUE	FALSE	TRUE
16	16_LD	LD	0.438025480130804	0.330683906416736	FALSE	FALSE	FALSE	FALSE	FALSE	FALSE	FALSE	FALSE	FALSE	FALSE	FALSE	TRUE
160	160_FBDHS	FBDHS	-2.26245500332668	0.988165347047658	TRUE	FALSE	FALSE	TRUE	FALSE	FALSE	TRUE	FALSE	FALSE	FALSE	FALSE	TRUE
161	161_FBDHS	FBDHS	2.91013931018492	0.00180633843879493	TRUE	FALSE	FALSE	TRUE	FALSE	FALSE	TRUE	FALSE	FALSE	TRUE	FALSE	TRUE
163	163_FBDHS	FBDHS	-0.121864346505725	0.54849677375644	TRUE	FALSE	FALSE	FALSE	FALSE	FALSE	FALSE	FALSE	FALSE	TRUE	FALSE	TRUE
164	164_FBDHS	FBDHS	0.677818804475653	0.248943293309145	TRUE	FALSE	FALSE	TRUE	FALSE	FALSE	TRUE	FALSE	FALSE	FALSE	FALSE	TRUE
165	165_FBDHS	FBDHS	1.12334217769991	0.130646098560644	TRUE	FALSE	FALSE	TRUE	FALSE	FALSE	TRUE	FALSE	FALSE	FALSE	FALSE	TRUE
166	166_FBDHS	FBDHS	1.59498394268703	0.0553579132895033	TRUE	FALSE	FALSE	TRUE	FALSE	FALSE	TRUE	FALSE	FALSE	FALSE	FALSE	TRUE
167	167_FBDHS	FBDHS	1.5193557161213	0.0643364911702223	TRUE	FALSE	FALSE	FALSE	FALSE	FALSE	TRUE	FALSE	FALSE	TRUE	FALSE	TRUE
168	168_FBDHS	FBDHS	-0.899241790770741	0.81573805752934	FALSE	FALSE	FALSE	FALSE	FALSE	FALSE	TRUE	FALSE	FALSE	FALSE	FALSE	TRUE
17	17_LD	LD	-0.353284602913547	0.638062456312791	FALSE	FALSE	FALSE	FALSE	FALSE	FALSE	FALSE	TRUE	FALSE	FALSE	FALSE	TRUE
170	170_FBDHS	FBDHS	1.19232506722748	0.11656690459457	TRUE	FALSE	FALSE	FALSE	FALSE	FALSE	FALSE	FALSE	FALSE	TRUE	FALSE	TRUE
171	171_FBDHS	FBDHS	0.0974845354316535	0.461170807335857	FALSE	FALSE	FALSE	FALSE	FALSE	FALSE	FALSE	FALSE	FALSE	FALSE	FALSE	TRUE
172	172_FBDHS	FBDHS	-0.0986281562479623	0.539283243221685	TRUE	FALSE	FALSE	TRUE	FALSE	FALSE	TRUE	FALSE	FALSE	FALSE	FALSE	TRUE
173	173_FBDHS	FBDHS	-0.104191100941087	0.541491152022024	TRUE	FALSE	FALSE	FALSE	FALSE	FALSE	FALSE	TRUE	FALSE	TRUE	FALSE	TRUE
174	174_FBDHS	FBDHS	0.010877062753021	0.495660765344242	FALSE	FALSE	FALSE	TRUE	FALSE	FALSE	FALSE	FALSE	FALSE	TRUE	FALSE	TRUE
175	175_FBDHS	FBDHS	0.00767898433437514	0.496936558585397	FALSE	FALSE	FALSE	FALSE	FALSE	FALSE	FALSE	FALSE	FALSE	FALSE	FALSE	TRUE
176	176_FBDHS	FBDHS	-0.991812354240922	0.839355465021445	FALSE	FALSE	FALSE	TRUE	FALSE	FALSE	TRUE	FALSE	FALSE	FALSE	FALSE	FALSE
177	177_FBDHS	FBDHS	0.507461948371468	0.305915364465065	FALSE	FALSE	FALSE	TRUE	FALSE	FALSE	FALSE	FALSE	FALSE	FALSE	FALSE	TRUE
178	178_FBDHS	FBDHS	-0.0266001908299097	0.51061068947285	FALSE	FALSE	FALSE	TRUE	FALSE	FALSE	FALSE	FALSE	FALSE	FALSE	FALSE	TRUE
179	179_FBDHS	FBDHS	0.746545582035885	0.227668953576522	TRUE	FALSE	FALSE	TRUE	FALSE	FALSE	TRUE	TRUE	FALSE	FALSE	FALSE	TRUE
18	18_LD	LD	-0.701145020198896	0.758393741512507	FALSE	FALSE	FALSE	FALSE	FALSE	FALSE	FALSE	FALSE	FALSE	FALSE	FALSE	TRUE
180	180_FBDHS	FBDHS	-0.454913558968237	0.675414286077577	TRUE	FALSE	FALSE	TRUE	FALSE	FALSE	TRUE	FALSE	FALSE	FALSE	FALSE	TRUE
182	182_FBDHS	FBDHS	1.33796543810904	0.0904538518007916	TRUE	FALSE	FALSE	TRUE	FALSE	FALSE	FALSE	FALSE	FALSE	FALSE	FALSE	TRUE
183	183_FBDHS	FBDHS	0.661643658256473	0.254099810425311	TRUE	FALSE	FALSE	FALSE	FALSE	FALSE	FALSE	FALSE	FALSE	FALSE	FALSE	FALSE
184	184_FBDHS	FBDHS	-0.72488137296803	0.76573759542989	TRUE	FALSE	FALSE	FALSE	FALSE	FALSE	FALSE	FALSE	FALSE	TRUE	FALSE	TRUE
185	185_FBDHS	FBDHS	-0.616780916700716	0.731310379607479	TRUE	FALSE	FALSE	TRUE	FALSE	FALSE	FALSE	FALSE	FALSE	TRUE	FALSE	TRUE
186	186_FBDHS	FBDHS	-0.948595393329771	0.828586782569563	FALSE	FALSE	FALSE	FALSE	FALSE	FALSE	FALSE	FALSE	FALSE	FALSE	FALSE	TRUE
187	187_FBDHS	FBDHS	0.335009021786948	0.368809140338534	TRUE	FALSE	FALSE	TRUE	FALSE	FALSE	FALSE	FALSE	FALSE	FALSE	FALSE	TRUE
188	188_FBDHS	FBDHS	-0.0310931544107925	0.512402375489773	TRUE	FALSE	FALSE	TRUE	FALSE	FALSE	TRUE	FALSE	FALSE	TRUE	FALSE	FALSE
189	189_FBDHS	FBDHS	1.6213917635741	0.0524668230302891	TRUE	FALSE	FALSE	FALSE	FALSE	FALSE	FALSE	FALSE	FALSE	FALSE	FALSE	TRUE
19	19_LD	LD	1.17831922045872	0.119334684036846	TRUE	FALSE	FALSE	TRUE	FALSE	FALSE	FALSE	FALSE	FALSE	TRUE	FALSE	TRUE
190	190_FBDHS	FBDHS	-0.183394484658132	0.572755748457525	TRUE	FALSE	FALSE	TRUE	FALSE	FALSE	FALSE	FALSE	FALSE	FALSE	FALSE	FALSE
191	191_FBDHS	FBDHS	0.482816465852903	0.314613029168803	TRUE	FALSE	FALSE	TRUE	FALSE	FALSE	FALSE	FALSE	FALSE	FALSE	FALSE	FALSE
192	192_FBDHS	FBDHS	-0.539447804581968	0.705211048482415	TRUE	FALSE	FALSE	TRUE	FALSE	FALSE	FALSE	FALSE	FALSE	FALSE	FALSE	TRUE
193	193_FBDHS	FBDHS	1.75924179076686	0.0392682244082762	TRUE	FALSE	FALSE	TRUE	FALSE	FALSE	FALSE	FALSE	FALSE	TRUE	FALSE	TRUE
194	194_FBDHS	FBDHS	-2.8182537327012	0.99758571820972	FALSE	FALSE	FALSE	FALSE	FALSE	FALSE	FALSE	FALSE	FALSE	FALSE	FALSE	TRUE
195	195_FBDHS	FBDHS	-0.298093383020364	0.617184054142784	FALSE	FALSE	FALSE	FALSE	FALSE	FALSE	TRUE	FALSE	FALSE	FALSE	FALSE	TRUE
196	196_FBDHS	FBDHS	1.04160573002161	0.14879725549596	FALSE	FALSE	FALSE	FALSE	FALSE	FALSE	FALSE	FALSE	FALSE	FALSE	FALSE	FALSE
197	197_FBDHS	FBDHS	1.61767100371935	0.0528667590725839	TRUE	FALSE	FALSE	TRUE	FALSE	FALSE	TRUE	FALSE	FALSE	FALSE	FALSE	TRUE
198	198_FBDHS	FBDHS	-3.01787229905058	0.998727219259823	FALSE	FALSE	FALSE	FALSE	FALSE	FALSE	FALSE	FALSE	FALSE	FALSE	FALSE	FALSE
2	2_LD	LD	-1.42057348285166	0.922279604020309	TRUE	FALSE	FALSE	FALSE	FALSE	FALSE	FALSE	FALSE	FALSE	FALSE	FALSE	TRUE
20	20_LD	LD	0.613699100358617	0.269707091488912	FALSE	FALSE	FALSE	TRUE	FALSE	FALSE	FALSE	FALSE	FALSE	FALSE	FALSE	FALSE
202	202_FBDHS	FBDHS	1.31522945847006	0.094216398768978	FALSE	FALSE	FALSE	FALSE	FALSE	FALSE	FALSE	FALSE	FALSE	FALSE	FALSE	TRUE
203	203_FBDHS	FBDHS	-0.618320372120873	0.731817912243407	TRUE	FALSE	FALSE	TRUE	FALSE	FALSE	FALSE	FALSE	FALSE	FALSE	FALSE	TRUE
204	204_FBDHS	FBDHS	0.63785042286522	0.261785526427913	FALSE	FALSE	FALSE	FALSE	FALSE	FALSE	TRUE	FALSE	FALSE	FALSE	FALSE	TRUE
205	205_FBDHS	FBDHS	1.0839781825203	0.139187236236623	FALSE	FALSE	FALSE	FALSE	FALSE	FALSE	FALSE	FALSE	FALSE	FALSE	FALSE	TRUE
206	206_FBDHS	FBDHS	-0.777156364896026	0.781466738610868	TRUE	FALSE	FALSE	TRUE	FALSE	FALSE	FALSE	FALSE	FALSE	FALSE	FALSE	TRUE
208	208_FBDHS	FBDHS	0.280488561961701	0.389551349827426	TRUE	FALSE	FALSE	FALSE	FALSE	FALSE	FALSE	FALSE	FALSE	FALSE	FALSE	FALSE
209	209_FBDHS	FBDHS	1.54683397598111	0.0609516425452966	FALSE	FALSE	FALSE	FALSE	FALSE	FALSE	TRUE	FALSE	FALSE	FALSE	FALSE	TRUE
21	21_LD	LD	-0.839422413254546	0.799383844592601	FALSE	FALSE	FALSE	TRUE	FALSE	FALSE	FALSE	FALSE	TRUE	FALSE	FALSE	FALSE
210	210_FBDHS	FBDHS	-2.37126931502932	0.991136445581879	FALSE	FALSE	FALSE	FALSE	FALSE	FALSE	TRUE	FALSE	FALSE	FALSE	FALSE	TRUE
211	211_FBDHS	FBDHS	1.52785976427205	0.0632736799642926	FALSE	FALSE	FALSE	FALSE	FALSE	FALSE	FALSE	FALSE	FALSE	FALSE	FALSE	FALSE
212	212_FBDHS	FBDHS	-0.0344447240187209	0.513738739997937	TRUE	FALSE	FALSE	TRUE	TRUE	FALSE	TRUE	FALSE	FALSE	TRUE	FALSE	TRUE
213	213_FBDHS	FBDHS	2.49378646286575	0.00631942767667883	FALSE	FALSE	FALSE	FALSE	FALSE	FALSE	FALSE	FALSE	FALSE	FALSE	FALSE	FALSE
214	214_FBDHS	FBDHS	-2.80564760037651	0.997489221144836	TRUE	FALSE	FALSE	TRUE	FALSE	FALSE	TRUE	FALSE	FALSE	TRUE	FALSE	FALSE
215	215_FBDHS	FBDHS	-2.51386184809075	0.994029139849094	TRUE	FALSE	FALSE	FALSE	FALSE	FALSE	FALSE	FALSE	FALSE	TRUE	FALSE	FALSE
216	216_FBDHS	FBDHS	0.938071276527067	0.174103890919629	TRUE	FALSE	FALSE	FALSE	FALSE	FALSE	FALSE	FALSE	FALSE	FALSE	FALSE	TRUE
22	22_LD	LD	0.46768100550739	0.320006363215215	FALSE	FALSE	FALSE	TRUE	FALSE	FALSE	FALSE	FALSE	FALSE	TRUE	FALSE	TRUE
220	220_FBDHS	FBDHS	-0.19343340293663	0.5766902211832	FALSE	FALSE	FALSE	FALSE	FALSE	FALSE	FALSE	FALSE	FALSE	FALSE	FALSE	FALSE
221	221_FBDHS	FBDHS	-3.14576742318413	0.999171741616041	FALSE	FALSE	FALSE	FALSE	FALSE	FALSE	TRUE	FALSE	FALSE	FALSE	FALSE	TRUE
222	222_FBDHS	FBDHS	-1.71187654070983	0.956540288623638	FALSE	FALSE	FALSE	TRUE	FALSE	FALSE	TRUE	FALSE	FALSE	FALSE	FALSE	TRUE
223	223_FBDHS	FBDHS	-1.69876068931578	0.955317858376874	TRUE	FALSE	FALSE	FALSE	FALSE	FALSE	FALSE	FALSE	FALSE	FALSE	FALSE	FALSE
224	224_FBDHS	FBDHS	0.00669800113139323	0.497327904134329	TRUE	FALSE	FALSE	FALSE	FALSE	FALSE	TRUE	FALSE	FALSE	FALSE	FALSE	TRUE
225	225_FBDHS	FBDHS	-2.02572767330894	0.978603650390883	TRUE	FALSE	FALSE	FALSE	FALSE	FALSE	TRUE	FALSE	FALSE	FALSE	FALSE	TRUE
226	226_FBDHS	FBDHS	0.41253283277751	0.33997446034468	TRUE	FALSE	FALSE	FALSE	FALSE	FALSE	FALSE	FALSE	FALSE	FALSE	FALSE	TRUE
227	227_FBDHS	FBDHS	-1.1218759906643	0.869042414824064	FALSE	FALSE	FALSE	FALSE	FALSE	FALSE	FALSE	TRUE	TRUE	FALSE	FALSE	FALSE
228	228_FBDHS	FBDHS	0.562960710042529	0.286730819239943	TRUE	FALSE	FALSE	TRUE	FALSE	FALSE	TRUE	FALSE	FALSE	TRUE	FALSE	TRUE
229	229_FBDHS	FBDHS	0.829297918757913	0.203467924144348	TRUE	FALSE	FALSE	TRUE	FALSE	FALSE	TRUE	FALSE	FALSE	TRUE	FALSE	TRUE
23	23_GWAS	GWAS	0.301156102675607	0.381647730889427	FALSE	TRUE	FALSE	FALSE	FALSE	FALSE	FALSE	FALSE	FALSE	FALSE	FALSE	TRUE
230	230_FBDHS	FBDHS	-1.5032533523114	0.933613137890247	TRUE	FALSE	FALSE	FALSE	FALSE	FALSE	TRUE	TRUE	TRUE	TRUE	FALSE	TRUE
231	231_FBDHS	FBDHS	-0.00910203966639812	0.503631138322519	TRUE	FALSE	FALSE	TRUE	FALSE	FALSE	FALSE	FALSE	FALSE	FALSE	FALSE	TRUE
232	232_FBDHS	FBDHS	-0.137673904063157	0.554750927743276	FALSE	FALSE	FALSE	TRUE	FALSE	FALSE	TRUE	FALSE	FALSE	FALSE	FALSE	TRUE
234	234_FBDHS	FBDHS	1.41691793762622	0.0782534607137826	TRUE	FALSE	FALSE	TRUE	FALSE	TRUE	FALSE	FALSE	FALSE	FALSE	FALSE	TRUE
235	235_FBDHS	FBDHS	1.17238413488642	0.120521433100867	TRUE	FALSE	FALSE	TRUE	FALSE	FALSE	FALSE	FALSE	FALSE	FALSE	FALSE	FALSE
236	236_FBDHS	FBDHS	0.187801919101541	0.425515965655899	FALSE	FALSE	FALSE	FALSE	FALSE	FALSE	FALSE	FALSE	FALSE	FALSE	FALSE	FALSE
237	237_FBDHS	FBDHS	-0.154143177260814	0.561251577725333	TRUE	FALSE	FALSE	TRUE	TRUE	FALSE	TRUE	FALSE	FALSE	TRUE	FALSE	TRUE
238	238_FBDHS	FBDHS	-1.93330990741934	0.973400983968854	FALSE	FALSE	FALSE	TRUE	FALSE	FALSE	FALSE	TRUE	FALSE	FALSE	FALSE	TRUE
241	241_FBDHS	FBDHS	1.29065197244889	0.0984121927586399	FALSE	FALSE	FALSE	FALSE	FALSE	FALSE	FALSE	FALSE	FALSE	FALSE	FALSE	TRUE
242	242_FBDHS	FBDHS	-0.0136140169647211	0.505431039206691	TRUE	FALSE	FALSE	TRUE	TRUE	FALSE	TRUE	TRUE	FALSE	FALSE	TRUE	TRUE
244	244_FBDHS	FBDHS	0.955392001739485	0.169689748618848	TRUE	FALSE	FALSE	FALSE	TRUE	FALSE	TRUE	TRUE	TRUE	TRUE	TRUE	TRUE
246	246_FBDHS	FBDHS	-3.68257798866582	0.999884556399579	TRUE	FALSE	TRUE	TRUE	TRUE	FALSE	TRUE	TRUE	TRUE	TRUE	TRUE	TRUE
247	247_FBDHS	FBDHS	1.59242143066276	0.0556450220433344	TRUE	FALSE	FALSE	FALSE	FALSE	FALSE	FALSE	TRUE	FALSE	FALSE	FALSE	TRUE
249	249_FBDHS	FBDHS	-1.19229835213436	0.883427859778726	FALSE	FALSE	TRUE	TRUE	FALSE	FALSE	FALSE	TRUE	FALSE	FALSE	FALSE	TRUE
25	25_GWAS	GWAS	-0.582238594952828	0.719797009987486	FALSE	TRUE	FALSE	FALSE	FALSE	FALSE	FALSE	FALSE	FALSE	FALSE	FALSE	TRUE
250	250_LD	LD	-1.09236802470258	0.862664314205955	FALSE	FALSE	FALSE	FALSE	FALSE	FALSE	FALSE	FALSE	FALSE	FALSE	FALSE	TRUE
252	252_PutEnh_Arid1b_1	PutEnh	1.91793064794547	0.0275599027467935	TRUE	FALSE	FALSE	TRUE	TRUE	FALSE	TRUE	TRUE	TRUE	TRUE	FALSE	TRUE
253	253_PutEnh_NEG1	PutEnh	-1.16772349004397	0.878540840768743	TRUE	TRUE	FALSE	TRUE	TRUE	FALSE	TRUE	FALSE	FALSE	TRUE	FALSE	TRUE
255	255_PutEnh_Klhl32_hs676	PutEnh	0.580415215464811	0.280817323432162	TRUE	FALSE	FALSE	TRUE	TRUE	FALSE	TRUE	FALSE	FALSE	TRUE	TRUE	TRUE
257	257_PutEnh_Btrc_hs897	PutEnh	1.04097023572539	0.148944681185913	TRUE	FALSE	FALSE	TRUE	TRUE	FALSE	TRUE	TRUE	FALSE	TRUE	TRUE	TRUE
258	258_PutEnh_Arx_hs122	PutEnh	0.124480396655169	0.450467460426378	TRUE	TRUE	FALSE	FALSE	FALSE	FALSE	TRUE	FALSE	FALSE	TRUE	FALSE	TRUE
259	259_PutEnh_Scn1a	PutEnh	3.35197337544538	0.000401188674252493	TRUE	FALSE	FALSE	TRUE	TRUE	FALSE	TRUE	TRUE	TRUE	TRUE	TRUE	TRUE
26	26_GWAS	GWAS	0.0233006573907762	0.490705223667592	FALSE	FALSE	FALSE	FALSE	FALSE	FALSE	FALSE	FALSE	FALSE	FALSE	TRUE	TRUE
264	264_PutEnh_NEG4	PutEnh	-0.0362554775352463	0.514460674819978	FALSE	FALSE	FALSE	TRUE	FALSE	FALSE	FALSE	FALSE	FALSE	FALSE	FALSE	TRUE
266	266_PutEnh_Etv1_hs550	PutEnh	1.64219542698212	0.0502747550577695	TRUE	FALSE	FALSE	TRUE	FALSE	FALSE	TRUE	TRUE	FALSE	FALSE	TRUE	TRUE
267	267_GWAS	GWAS	-0.0787534163040287	0.531385621344899	FALSE	FALSE	FALSE	TRUE	FALSE	FALSE	FALSE	FALSE	FALSE	FALSE	FALSE	TRUE
268	268_GWAS	GWAS	-0.671991989851592	0.749205602125391	FALSE	FALSE	TRUE	FALSE	FALSE	FALSE	FALSE	FALSE	FALSE	FALSE	FALSE	TRUE
269	269_GWAS	GWAS	-1.5233730027937	0.936167293830027	FALSE	FALSE	FALSE	FALSE	FALSE	FALSE	FALSE	FALSE	FALSE	FALSE	FALSE	FALSE
27	27_GWAS	GWAS	1.21590752004792	0.112010076547132	TRUE	FALSE	FALSE	FALSE	FALSE	FALSE	TRUE	FALSE	FALSE	TRUE	FALSE	TRUE
270	270_GWAS	GWAS	-0.0982778730300561	0.53914417606126	FALSE	FALSE	FALSE	TRUE	FALSE	FALSE	TRUE	FALSE	FALSE	FALSE	FALSE	FALSE
271	271_GWAS	GWAS	0.238998619845372	0.405553326469524	TRUE	FALSE	FALSE	FALSE	FALSE	FALSE	FALSE	FALSE	FALSE	FALSE	FALSE	TRUE
272	272_GWAS	GWAS	-0.507222562325434	0.694000667105581	FALSE	FALSE	FALSE	FALSE	FALSE	FALSE	FALSE	FALSE	FALSE	FALSE	FALSE	TRUE
273	273_GWAS	GWAS	2.17819951699304	0.0146955930130597	FALSE	FALSE	FALSE	FALSE	FALSE	FALSE	FALSE	FALSE	FALSE	FALSE	FALSE	FALSE
275	275_GWAS	GWAS	0.0840964107983942	0.466489889152465	FALSE	FALSE	FALSE	TRUE	FALSE	FALSE	FALSE	FALSE	FALSE	FALSE	FALSE	TRUE
276	276_GWAS	GWAS	-2.68954202290812	0.996422493107975	FALSE	FALSE	FALSE	FALSE	FALSE	FALSE	FALSE	FALSE	FALSE	TRUE	FALSE	TRUE
28	28_GWAS	GWAS	2.55329915188468	0.00533539010333334	TRUE	FALSE	FALSE	FALSE	FALSE	FALSE	FALSE	FALSE	FALSE	FALSE	FALSE	FALSE
280	280_GWAS	GWAS	-1.02932697436392	0.848336974077554	TRUE	FALSE	FALSE	TRUE	FALSE	FALSE	FALSE	FALSE	FALSE	FALSE	FALSE	TRUE
281	281_GWAS	GWAS	-0.219935886984929	0.587039456623102	FALSE	FALSE	FALSE	TRUE	FALSE	FALSE	FALSE	FALSE	FALSE	FALSE	FALSE	TRUE
282	282_GWAS	GWAS	-1.41098357836751	0.92087527191384	FALSE	FALSE	FALSE	FALSE	FALSE	FALSE	FALSE	FALSE	TRUE	FALSE	FALSE	TRUE
283	283_GWAS	GWAS	0.628970717585582	0.264684113470385	TRUE	FALSE	TRUE	TRUE	FALSE	FALSE	TRUE	FALSE	FALSE	FALSE	FALSE	TRUE
288	288_GWAS	GWAS	-2.69262015160038	0.996455350684088	FALSE	FALSE	FALSE	FALSE	FALSE	FALSE	FALSE	FALSE	FALSE	FALSE	FALSE	TRUE
29	29_GWAS	GWAS	-1.37762700812944	0.915840761083502	FALSE	FALSE	FALSE	FALSE	FALSE	FALSE	FALSE	FALSE	FALSE	FALSE	FALSE	TRUE
291	291_GWAS	GWAS	3.01271646465323	0.0012946035243608	TRUE	FALSE	FALSE	FALSE	FALSE	FALSE	FALSE	FALSE	FALSE	TRUE	FALSE	TRUE
292	292_GWAS	GWAS	-1.08753837835679	0.861600526439508	FALSE	FALSE	FALSE	FALSE	FALSE	FALSE	FALSE	FALSE	FALSE	FALSE	FALSE	FALSE
294	294_GWAS	GWAS	0.18496788141383	0.426627113881163	FALSE	FALSE	FALSE	TRUE	FALSE	FALSE	FALSE	FALSE	FALSE	FALSE	FALSE	TRUE
297	297_GWAS	GWAS	-0.837727139548905	0.798908016286127	FALSE	FALSE	FALSE	FALSE	FALSE	FALSE	FALSE	FALSE	FALSE	FALSE	FALSE	TRUE
298	298_GWAS	GWAS	-1.43514274284944	0.924376787172416	FALSE	FALSE	FALSE	FALSE	FALSE	FALSE	FALSE	FALSE	FALSE	TRUE	FALSE	TRUE
299	299_GWAS	GWAS	0.622956462183336	0.266656566367936	FALSE	FALSE	FALSE	FALSE	FALSE	FALSE	FALSE	FALSE	FALSE	FALSE	FALSE	FALSE
3	3_LD	LD	2.23647479541147	0.0126603432586833	TRUE	FALSE	FALSE	TRUE	FALSE	FALSE	FALSE	FALSE	FALSE	TRUE	FALSE	TRUE
300	300_GWAS	GWAS	1.76282124476026	0.0389653215551916	TRUE	FALSE	FALSE	TRUE	FALSE	FALSE	TRUE	FALSE	FALSE	TRUE	FALSE	TRUE
301	301_GWAS	GWAS	-0.213483810236823	0.584525192187362	FALSE	FALSE	FALSE	FALSE	FALSE	FALSE	FALSE	FALSE	FALSE	FALSE	FALSE	FALSE
302	302_GWAS	GWAS	-0.15016385871079	0.559682330450182	FALSE	FALSE	FALSE	FALSE	FALSE	FALSE	FALSE	FALSE	FALSE	FALSE	FALSE	TRUE
303	303_GWAS	GWAS	-0.385018951017086	0.649888312513443	FALSE	FALSE	FALSE	FALSE	FALSE	FALSE	FALSE	FALSE	FALSE	FALSE	FALSE	FALSE
304	304_GWAS	GWAS	-1.3687712553368	0.914464605621696	FALSE	FALSE	FALSE	FALSE	FALSE	FALSE	FALSE	FALSE	FALSE	FALSE	FALSE	FALSE
305	305_GWAS	GWAS	-0.73898257076915	0.770041209532568	FALSE	FALSE	FALSE	FALSE	FALSE	FALSE	FALSE	FALSE	FALSE	FALSE	FALSE	TRUE
306	306_GWAS	GWAS	-0.130581863047736	0.551946954474872	FALSE	FALSE	FALSE	FALSE	FALSE	FALSE	FALSE	FALSE	FALSE	FALSE	FALSE	FALSE
307	307_GWAS	GWAS	-2.71938252927151	0.996729803914642	FALSE	FALSE	TRUE	FALSE	FALSE	FALSE	FALSE	TRUE	TRUE	FALSE	FALSE	TRUE
308	308_GWAS	GWAS	1.4105992454871	0.0791814071173493	FALSE	FALSE	FALSE	FALSE	FALSE	FALSE	FALSE	FALSE	FALSE	TRUE	FALSE	TRUE
311	311_GWAS	GWAS	0.281967591052753	0.388984180498472	TRUE	FALSE	FALSE	FALSE	FALSE	FALSE	FALSE	FALSE	FALSE	FALSE	FALSE	TRUE
312	312_GWAS	GWAS	-3.30730916892355	0.999529015664765	FALSE	FALSE	FALSE	FALSE	FALSE	TRUE	FALSE	FALSE	FALSE	FALSE	FALSE	TRUE
313	313_GWAS	GWAS	1.87041895414328	0.0307128309487396	FALSE	FALSE	FALSE	FALSE	FALSE	FALSE	FALSE	FALSE	FALSE	FALSE	FALSE	TRUE
314	314_GWAS	GWAS	-6.50537546619749	0.99999999996125	FALSE	FALSE	FALSE	FALSE	FALSE	FALSE	FALSE	FALSE	FALSE	FALSE	FALSE	FALSE
315	315_GWAS	GWAS	-0.0749771201610144	0.529883541945634	FALSE	FALSE	FALSE	FALSE	FALSE	FALSE	FALSE	FALSE	FALSE	FALSE	FALSE	TRUE
316	316_GWAS	GWAS	1.41774405030706	0.0781327521466944	FALSE	FALSE	FALSE	FALSE	FALSE	FALSE	FALSE	FALSE	FALSE	FALSE	FALSE	FALSE
317	317_GWAS	GWAS	-1.75754123974863	0.960587200510726	FALSE	FALSE	FALSE	FALSE	FALSE	TRUE	FALSE	FALSE	FALSE	FALSE	FALSE	FALSE
319	319_GWAS	GWAS	-0.26614751963159	0.604937200531604	FALSE	FALSE	FALSE	FALSE	FALSE	FALSE	FALSE	FALSE	FALSE	TRUE	FALSE	TRUE
320	320_GWAS	GWAS	0.8617251678586	0.194419386299148	TRUE	FALSE	FALSE	FALSE	FALSE	FALSE	FALSE	FALSE	FALSE	TRUE	FALSE	TRUE
33	33_GWAS	GWAS	-3.80590117409491	0.999929355602698	FALSE	FALSE	FALSE	FALSE	FALSE	FALSE	FALSE	FALSE	FALSE	FALSE	FALSE	TRUE
331	331_GWAS	GWAS	1.86249467494691	0.0312666976721054	FALSE	FALSE	FALSE	TRUE	FALSE	FALSE	FALSE	FALSE	FALSE	FALSE	FALSE	TRUE
332	332_GWAS	GWAS	0.694147785235094	0.243794766926902	FALSE	FALSE	FALSE	FALSE	FALSE	FALSE	FALSE	TRUE	FALSE	FALSE	FALSE	TRUE
333	333_GWAS	GWAS	-0.225941218689181	0.589376430626701	FALSE	FALSE	TRUE	FALSE	FALSE	TRUE	FALSE	FALSE	FALSE	FALSE	FALSE	FALSE
335	335_GWAS	GWAS	-1.39676215326852	0.918757446585427	FALSE	FALSE	FALSE	FALSE	FALSE	FALSE	FALSE	FALSE	FALSE	TRUE	FALSE	FALSE
336	336_GWAS	GWAS	-0.191436943535974	0.575908360750384	FALSE	FALSE	FALSE	FALSE	FALSE	FALSE	FALSE	FALSE	FALSE	FALSE	FALSE	TRUE
337	337_GWAS	GWAS	1.72715669064595	0.0420697632838232	FALSE	FALSE	FALSE	FALSE	FALSE	FALSE	FALSE	FALSE	FALSE	FALSE	FALSE	TRUE
339	339_GWAS	GWAS	-1.46116784521851	0.928015307509146	FALSE	FALSE	FALSE	FALSE	FALSE	FALSE	FALSE	FALSE	FALSE	FALSE	FALSE	FALSE
34	34_GWAS	GWAS	-2.55644149058411	0.994712557325217	FALSE	FALSE	FALSE	FALSE	FALSE	FALSE	FALSE	FALSE	FALSE	FALSE	FALSE	TRUE
340	340_GWAS	GWAS	1.81635348769343	0.0346580826114819	TRUE	FALSE	FALSE	FALSE	FALSE	FALSE	FALSE	FALSE	FALSE	FALSE	FALSE	TRUE
344	344_GWAS	GWAS	-0.0173636756905126	0.506926756308064	TRUE	FALSE	FALSE	FALSE	FALSE	FALSE	FALSE	FALSE	FALSE	TRUE	FALSE	TRUE
346	346_GWAS	GWAS	-0.608923048187171	0.728712276843955	FALSE	FALSE	FALSE	FALSE	FALSE	FALSE	FALSE	FALSE	FALSE	FALSE	FALSE	TRUE
347	347_GWAS	GWAS	-1.6313350699147	0.948590181356585	FALSE	FALSE	FALSE	FALSE	FALSE	FALSE	FALSE	FALSE	FALSE	FALSE	FALSE	TRUE
348	348_GWAS	GWAS	1.06498249860792	0.143441924855708	FALSE	FALSE	FALSE	FALSE	FALSE	FALSE	FALSE	FALSE	FALSE	FALSE	FALSE	TRUE
349	349_GWAS	GWAS	-0.47351413587407	0.682076790852009	FALSE	FALSE	FALSE	FALSE	FALSE	FALSE	FALSE	FALSE	FALSE	FALSE	FALSE	TRUE
35	35_GWAS	GWAS	0.551115484447838	0.290777255656803	FALSE	FALSE	FALSE	FALSE	FALSE	FALSE	FALSE	FALSE	FALSE	TRUE	FALSE	TRUE
350	350_GWAS	GWAS	2.09461964810049	0.018102408592519	FALSE	FALSE	FALSE	FALSE	FALSE	FALSE	FALSE	FALSE	FALSE	FALSE	FALSE	FALSE
357	357_GWAS	GWAS	-3.46030811902009	0.999730221191293	FALSE	FALSE	FALSE	TRUE	TRUE	FALSE	FALSE	FALSE	FALSE	FALSE	FALSE	TRUE
358	358_GWAS	GWAS	0.175041839726682	0.430523378860296	TRUE	FALSE	FALSE	FALSE	FALSE	FALSE	TRUE	FALSE	FALSE	TRUE	FALSE	TRUE
361	361_GWAS	GWAS	-1.61543258263728	0.946891475493246	FALSE	TRUE	FALSE	FALSE	FALSE	FALSE	FALSE	FALSE	FALSE	FALSE	FALSE	FALSE
362	362_GWAS	GWAS	-1.14459536847779	0.873811594120994	TRUE	FALSE	FALSE	TRUE	TRUE	FALSE	TRUE	TRUE	TRUE	TRUE	TRUE	FALSE
363	363_GWAS	GWAS	0.918922917523017	0.179067945937727	FALSE	FALSE	FALSE	FALSE	FALSE	FALSE	FALSE	FALSE	FALSE	FALSE	FALSE	FALSE
364	364_GWAS	GWAS	0.1886490965261	0.425183925084697	FALSE	FALSE	FALSE	FALSE	FALSE	FALSE	FALSE	FALSE	FALSE	FALSE	FALSE	FALSE
365	365_GWAS	GWAS	0.14588915978635	0.442004444633213	FALSE	FALSE	FALSE	FALSE	FALSE	TRUE	FALSE	FALSE	FALSE	FALSE	FALSE	FALSE
366	366_GWAS	GWAS	-2.05906540010665	0.980256013087555	TRUE	TRUE	FALSE	TRUE	FALSE	FALSE	FALSE	FALSE	FALSE	FALSE	FALSE	TRUE
367	367_GWAS	GWAS	0.741377462473374	0.229232302862425	FALSE	FALSE	FALSE	TRUE	FALSE	FALSE	FALSE	FALSE	FALSE	FALSE	FALSE	FALSE
368	368_GWAS	GWAS	-1.74954160441781	0.959901278128525	TRUE	FALSE	FALSE	TRUE	FALSE	FALSE	FALSE	FALSE	FALSE	FALSE	FALSE	TRUE
370	370_GWAS	GWAS	-2.92808709607685	0.998294727534307	FALSE	FALSE	FALSE	FALSE	FALSE	FALSE	FALSE	FALSE	FALSE	FALSE	FALSE	TRUE
372	372_GWAS	GWAS	0.772657417355487	0.219862577057088	FALSE	FALSE	TRUE	FALSE	FALSE	FALSE	FALSE	FALSE	FALSE	FALSE	FALSE	FALSE
373	373_GWAS	GWAS	-1.13790767846299	0.872420482665679	FALSE	FALSE	FALSE	FALSE	FALSE	FALSE	FALSE	FALSE	FALSE	FALSE	FALSE	FALSE
374	374_GWAS	GWAS	1.75776683982949	0.0393935948575138	FALSE	FALSE	FALSE	FALSE	FALSE	FALSE	FALSE	FALSE	FALSE	FALSE	FALSE	TRUE
375	375_GWAS	GWAS	0.686494423730857	0.246200689747751	FALSE	FALSE	FALSE	FALSE	FALSE	TRUE	FALSE	FALSE	FALSE	FALSE	FALSE	TRUE
376	376_GWAS	GWAS	-0.983716747884387	0.837372598599633	FALSE	FALSE	FALSE	TRUE	TRUE	FALSE	FALSE	FALSE	FALSE	TRUE	FALSE	TRUE
377	377_GWAS	GWAS	-2.76927985616438	0.997190982200601	FALSE	FALSE	FALSE	FALSE	FALSE	FALSE	FALSE	FALSE	FALSE	FALSE	FALSE	FALSE
378	378_GWAS	GWAS	-2.54106581277618	0.994474244263789	TRUE	FALSE	FALSE	FALSE	FALSE	FALSE	TRUE	TRUE	TRUE	TRUE	TRUE	TRUE
38	38_GWAS	GWAS	-1.48738589299232	0.931543539706567	FALSE	FALSE	FALSE	FALSE	FALSE	FALSE	FALSE	FALSE	FALSE	FALSE	FALSE	TRUE
380	380_GWAS	GWAS	-0.0974989620595132	0.538834920769381	FALSE	FALSE	FALSE	FALSE	FALSE	FALSE	FALSE	FALSE	FALSE	TRUE	FALSE	FALSE
381	381_GWAS	GWAS	0.199153803870379	0.42107121733767	FALSE	FALSE	FALSE	FALSE	FALSE	FALSE	FALSE	FALSE	FALSE	FALSE	FALSE	TRUE
382	382_GWAS	GWAS	-0.205379569550718	0.581362209407634	FALSE	FALSE	FALSE	FALSE	FALSE	FALSE	FALSE	FALSE	FALSE	FALSE	FALSE	FALSE
384	384_GWAS	GWAS	-0.890104049905693	0.8132949907177	FALSE	FALSE	FALSE	FALSE	FALSE	FALSE	FALSE	FALSE	FALSE	FALSE	FALSE	TRUE
386	386_GWAS	GWAS	-1.79428964522455	0.963616525006934	FALSE	FALSE	FALSE	FALSE	FALSE	FALSE	FALSE	FALSE	FALSE	FALSE	FALSE	TRUE
387	387_GWAS	GWAS	2.74458276207804	0.00302939374988245	FALSE	FALSE	FALSE	FALSE	FALSE	TRUE	FALSE	FALSE	FALSE	FALSE	FALSE	FALSE
39	39_GWAS	GWAS	-1.03962713178411	0.850743416705002	FALSE	FALSE	FALSE	FALSE	FALSE	FALSE	FALSE	FALSE	FALSE	FALSE	FALSE	TRUE
390	390_GWAS	GWAS	-0.229777322782138	0.590867596462742	TRUE	FALSE	FALSE	FALSE	FALSE	FALSE	FALSE	FALSE	FALSE	FALSE	FALSE	TRUE
392	392_GWAS	GWAS	-0.184179034035296	0.573063496734629	FALSE	FALSE	TRUE	FALSE	FALSE	FALSE	FALSE	FALSE	FALSE	FALSE	FALSE	FALSE
393	393_GWAS	GWAS	0.442939465375914	0.328904760329467	FALSE	FALSE	FALSE	FALSE	FALSE	FALSE	FALSE	FALSE	FALSE	FALSE	FALSE	TRUE
394	394_GWAS	GWAS	0.35110866152199	0.362753415078394	FALSE	FALSE	FALSE	FALSE	FALSE	FALSE	FALSE	FALSE	FALSE	FALSE	FALSE	TRUE
395	395_GWAS	GWAS	2.16132221781809	0.0153352289176186	FALSE	FALSE	TRUE	TRUE	FALSE	FALSE	FALSE	FALSE	FALSE	FALSE	FALSE	TRUE
396	396_GWAS	GWAS	2.23219560783844	0.012801018793535	TRUE	FALSE	FALSE	TRUE	FALSE	FALSE	FALSE	FALSE	FALSE	TRUE	FALSE	TRUE
397	397_GWAS	GWAS	-1.53355518223647	0.937430439378191	TRUE	FALSE	FALSE	FALSE	FALSE	FALSE	FALSE	FALSE	FALSE	FALSE	FALSE	TRUE
399	399_GWAS	GWAS	-0.472448896173081	0.681696794825158	TRUE	FALSE	FALSE	FALSE	FALSE	FALSE	TRUE	TRUE	TRUE	FALSE	FALSE	TRUE
4	4_LD	LD	-1.36027201868976	0.913128070192285	TRUE	FALSE	FALSE	FALSE	FALSE	FALSE	FALSE	FALSE	FALSE	FALSE	FALSE	TRUE
40	40_GWAS	GWAS	1.22020078445426	0.111194384789357	FALSE	FALSE	FALSE	FALSE	FALSE	FALSE	FALSE	FALSE	FALSE	FALSE	FALSE	TRUE
403	403_GWAS	GWAS	-2.04569410730067	0.979606762062155	FALSE	FALSE	TRUE	FALSE	FALSE	FALSE	FALSE	FALSE	FALSE	FALSE	FALSE	TRUE
406	406_GWAS	GWAS	1.77959974383898	0.0375707440891009	FALSE	FALSE	FALSE	FALSE	FALSE	FALSE	FALSE	FALSE	FALSE	FALSE	FALSE	FALSE
407	407_GWAS	GWAS	-0.50941167672461	0.694768153328571	FALSE	FALSE	FALSE	FALSE	FALSE	FALSE	FALSE	FALSE	FALSE	FALSE	FALSE	FALSE
41	41_GWAS	GWAS	-1.91085097302132	0.971988132491716	FALSE	FALSE	FALSE	FALSE	FALSE	FALSE	FALSE	FALSE	FALSE	FALSE	FALSE	FALSE
42	42_GWAS	GWAS	-1.15845351106919	0.876660493623879	FALSE	FALSE	FALSE	FALSE	FALSE	FALSE	FALSE	FALSE	FALSE	FALSE	FALSE	TRUE
44	44_GWAS	GWAS	-0.621708201859358	0.732933121248228	FALSE	FALSE	FALSE	FALSE	FALSE	FALSE	FALSE	FALSE	FALSE	TRUE	FALSE	TRUE
45	45_GWAS	GWAS	-0.627705557542574	0.73490157800358	FALSE	FALSE	FALSE	FALSE	FALSE	FALSE	FALSE	FALSE	FALSE	FALSE	FALSE	FALSE
46	46_GWAS	GWAS	1.33253660148928	0.0913419611929114	FALSE	FALSE	FALSE	FALSE	FALSE	TRUE	FALSE	FALSE	FALSE	FALSE	FALSE	FALSE
49	49_LD	LD	-3.11328325190163	0.999074908227673	FALSE	FALSE	FALSE	FALSE	FALSE	FALSE	FALSE	FALSE	FALSE	FALSE	FALSE	FALSE
5	5_LD	LD	0.349684118845427	0.363287886728996	FALSE	FALSE	FALSE	FALSE	FALSE	FALSE	FALSE	FALSE	FALSE	FALSE	FALSE	TRUE
52	52_LD	LD	1.99292128024884	0.0231350338499472	FALSE	FALSE	FALSE	FALSE	FALSE	FALSE	FALSE	FALSE	FALSE	FALSE	FALSE	TRUE
54	54_LD	LD	-0.31890114891622	0.625099263467025	TRUE	FALSE	FALSE	FALSE	FALSE	FALSE	FALSE	FALSE	FALSE	FALSE	FALSE	FALSE
56	56_LD	LD	0.142966689389911	0.443158244457361	FALSE	FALSE	FALSE	FALSE	FALSE	FALSE	FALSE	FALSE	FALSE	FALSE	FALSE	TRUE
57	57_LD	LD	-3.98734842917766	0.999966592068238	FALSE	FALSE	FALSE	FALSE	FALSE	FALSE	FALSE	FALSE	FALSE	FALSE	FALSE	TRUE
58	58_LD	LD	0.592583480450055	0.27672996864754	TRUE	FALSE	FALSE	FALSE	FALSE	FALSE	FALSE	FALSE	FALSE	TRUE	FALSE	FALSE
59	59_LD	LD	-0.129583668656881	0.551552087592774	FALSE	FALSE	FALSE	FALSE	FALSE	FALSE	FALSE	FALSE	FALSE	FALSE	FALSE	TRUE
6	6_LD	LD	2.04581562049801	0.0203872572961795	TRUE	FALSE	FALSE	TRUE	FALSE	FALSE	FALSE	FALSE	FALSE	FALSE	FALSE	TRUE
60	60_LD	LD	0.682038107064606	0.247607427581808	FALSE	FALSE	FALSE	FALSE	FALSE	FALSE	FALSE	FALSE	FALSE	FALSE	FALSE	TRUE
61	61_LD	LD	0.682598098132237	0.247430418100794	FALSE	FALSE	FALSE	FALSE	FALSE	FALSE	FALSE	FALSE	FALSE	FALSE	FALSE	FALSE
62	62_LD	LD	-1.82344085819264	0.965881676592654	FALSE	FALSE	FALSE	FALSE	FALSE	FALSE	FALSE	FALSE	FALSE	FALSE	FALSE	TRUE
63	63_LD	LD	0.0360581256717968	0.485618005735421	FALSE	FALSE	FALSE	FALSE	FALSE	FALSE	FALSE	FALSE	FALSE	FALSE	FALSE	TRUE
64	64_LD	LD	-3.70273304192332	0.99989335535724	FALSE	FALSE	FALSE	FALSE	FALSE	FALSE	FALSE	FALSE	FALSE	FALSE	FALSE	TRUE
65	65_LD	LD	-0.448355424831058	0.673051646839662	FALSE	FALSE	TRUE	FALSE	FALSE	FALSE	FALSE	FALSE	FALSE	FALSE	FALSE	TRUE
66	66_LD	LD	-0.382714347836235	0.649034212532508	FALSE	FALSE	FALSE	FALSE	FALSE	FALSE	FALSE	FALSE	FALSE	FALSE	FALSE	TRUE
67	67_LD	LD	-1.62966250591531	0.948413577068647	FALSE	FALSE	FALSE	FALSE	FALSE	FALSE	FALSE	FALSE	FALSE	FALSE	FALSE	TRUE
68	68_LD	LD	-2.17997135070281	0.985370207364521	FALSE	FALSE	FALSE	FALSE	FALSE	FALSE	FALSE	FALSE	FALSE	FALSE	FALSE	TRUE
69	69_LD	LD	2.11211675952443	0.0173382179200693	FALSE	FALSE	FALSE	FALSE	FALSE	FALSE	FALSE	FALSE	FALSE	FALSE	FALSE	FALSE
7	7_LD	LD	2.34365053707835	0.00954802717340869	TRUE	FALSE	FALSE	TRUE	FALSE	FALSE	TRUE	FALSE	FALSE	TRUE	FALSE	TRUE
71	71_LD	LD	0.502743670506623	0.307572250943314	FALSE	FALSE	FALSE	FALSE	FALSE	FALSE	FALSE	FALSE	FALSE	FALSE	FALSE	TRUE
72	72_LD	LD	0.493225258479718	0.310926716283067	FALSE	FALSE	FALSE	FALSE	FALSE	FALSE	FALSE	FALSE	FALSE	FALSE	FALSE	TRUE
73	73_LD	LD	-0.491649418596618	0.6885163992543	FALSE	FALSE	FALSE	FALSE	FALSE	FALSE	FALSE	FALSE	FALSE	FALSE	FALSE	TRUE
74	74_LD	LD	-0.494783562936086	0.689623545884862	FALSE	FALSE	FALSE	FALSE	FALSE	FALSE	FALSE	FALSE	FALSE	FALSE	FALSE	TRUE
75	75_LD	LD	-2.43864832771867	0.992628846417078	FALSE	FALSE	FALSE	FALSE	FALSE	FALSE	FALSE	FALSE	FALSE	FALSE	FALSE	TRUE
77	77_LD	LD	-2.42330957448402	0.992310092921794	FALSE	FALSE	FALSE	FALSE	FALSE	FALSE	FALSE	FALSE	FALSE	FALSE	FALSE	TRUE
78	78_LD	LD	0.474570660336687	0.317546511329221	FALSE	FALSE	FALSE	FALSE	FALSE	FALSE	FALSE	FALSE	FALSE	FALSE	FALSE	TRUE
79	79_LD	LD	-2.63944983311551	0.995847964369179	FALSE	FALSE	FALSE	FALSE	FALSE	FALSE	FALSE	FALSE	FALSE	FALSE	FALSE	TRUE
8	8_LD	LD	0.36907645729907	0.356035368223544	FALSE	FALSE	FALSE	FALSE	FALSE	FALSE	FALSE	FALSE	FALSE	FALSE	FALSE	FALSE
80	80_LD	LD	0.918419967215773	0.179199520568904	FALSE	FALSE	FALSE	FALSE	FALSE	FALSE	FALSE	FALSE	FALSE	FALSE	FALSE	TRUE
81	81_LD	LD	0.226588778265518	0.410371759501799	FALSE	FALSE	FALSE	FALSE	FALSE	FALSE	FALSE	FALSE	FALSE	FALSE	FALSE	TRUE
82	82_LD	LD	0.122184855088107	0.451376310235338	FALSE	FALSE	FALSE	FALSE	FALSE	FALSE	FALSE	FALSE	FALSE	FALSE	FALSE	TRUE
83	83_LD	LD	1.44870656417332	0.0737097732714599	FALSE	FALSE	FALSE	FALSE	FALSE	FALSE	FALSE	FALSE	FALSE	FALSE	FALSE	TRUE
84	84_LD	LD	1.86088736162174	0.0313800424528488	FALSE	FALSE	FALSE	FALSE	FALSE	FALSE	FALSE	FALSE	FALSE	FALSE	FALSE	TRUE
85	85_LD	LD	0.284696629290768	0.387938286634078	FALSE	FALSE	FALSE	FALSE	FALSE	FALSE	TRUE	FALSE	FALSE	FALSE	FALSE	TRUE
86	86_LD	LD	-0.757023522843054	0.775482115053084	FALSE	FALSE	FALSE	FALSE	FALSE	FALSE	FALSE	FALSE	FALSE	FALSE	FALSE	TRUE
87	87_LD	LD	1.28187968659327	0.0999424274099221	FALSE	FALSE	FALSE	FALSE	FALSE	FALSE	FALSE	FALSE	FALSE	FALSE	FALSE	TRUE
88	88_LD	LD	2.32222202755764	0.0101104917446087	FALSE	FALSE	FALSE	FALSE	FALSE	FALSE	FALSE	FALSE	FALSE	FALSE	FALSE	TRUE
89	89_LD	LD	-1.3312537360679	0.908447232314706	TRUE	FALSE	FALSE	FALSE	FALSE	FALSE	TRUE	TRUE	TRUE	TRUE	FALSE	TRUE
9	9_LD	LD	0.798865508356527	0.212184200345244	FALSE	FALSE	FALSE	FALSE	FALSE	FALSE	FALSE	FALSE	FALSE	FALSE	FALSE	TRUE
90	90_LD	LD	-0.489511541910122	0.687760207391108	FALSE	FALSE	FALSE	FALSE	FALSE	FALSE	FALSE	FALSE	FALSE	FALSE	FALSE	TRUE
91	91_LD	LD	-0.683455032372841	0.752840322180468	FALSE	FALSE	FALSE	FALSE	FALSE	FALSE	FALSE	FALSE	FALSE	FALSE	FALSE	TRUE
92	92_LD	LD	-0.185741165268178	0.573676127609079	FALSE	FALSE	FALSE	FALSE	FALSE	FALSE	FALSE	FALSE	FALSE	FALSE	FALSE	TRUE
93	93_LD	LD	-0.834303640726016	0.797945049608796	FALSE	FALSE	FALSE	FALSE	FALSE	FALSE	FALSE	FALSE	FALSE	FALSE	FALSE	TRUE
95	95_LD	LD	1.91358901862351	0.027836344646425	FALSE	FALSE	FALSE	FALSE	FALSE	FALSE	FALSE	FALSE	FALSE	FALSE	FALSE	FALSE
96	96_LD	LD	0.862414513693658	0.194229728320187	FALSE	FALSE	FALSE	FALSE	FALSE	FALSE	FALSE	FALSE	FALSE	FALSE	FALSE	TRUE
98	98_LD	LD	-3.17278370002467	0.999245075175494	TRUE	FALSE	FALSE	FALSE	FALSE	FALSE	FALSE	FALSE	FALSE	TRUE	FALSE	TRUE
99	99_LD	LD	0.638843129849254	0.261462493688665	FALSE	FALSE	FALSE	FALSE	FALSE	FALSE	FALSE	FALSE	FALSE	FALSE	FALSE	FALSE
