# Supplementary material for: Parallel functional testing identifies enhancers active in early postnatal mouse brain
Source: eLife journal article supplement (doi:10.7554/elife.69479), 2021-10-04
Supplement: supp [file elife-69479-supp-v1.zip › elife_poa_e69479_Supplementary_file_6.csv]

Epigenomic_predictor	Epi_GLM_covariate_P_value	P_0.05	P_0.05_Bonf.corr	Point_biserial_cor	BIC_without_epi_mark	BIC_with_epi_mark	Model_improved_by_BIC
DNase_Roadmap	0.000238274121472513	TRUE	TRUE	0.200020294329117	-2852.52684438639	-2860.49911806376	TRUE
H3K27me3_Roadmap	0.738483426647077	FALSE	FALSE	-0.0679495466164418	-2852.52684438639	-2846.90986119713	FALSE
H3K36me3_Roadmap	0.41999796119181	FALSE	FALSE	-0.0976179002154691	-2852.52684438639	-2847.45670676643	FALSE
H3K4me1_Roadmap	0.000208793902818407	TRUE	TRUE	0.178020333321282	-2852.52684438639	-2860.75075610923	TRUE
H3K4me3_Roadmap	0.299333742915283	FALSE	FALSE	0.0957625745145628	-2852.52684438639	-2847.88987370472	FALSE
H3K9me3_Roadmap	0.66337058297921	FALSE	FALSE	0.0212680780995641	-2852.52684438639	-2846.98900840412	FALSE
Fetal.Brain.TF.Footprints_BOCA	0.0398523248334885	TRUE	FALSE	0.101152201897422	-2852.52684438639	-2851.083522983	FALSE
Fetal.Lung.TF.Footprints_BOCA	0.307271349769717	FALSE	FALSE	0.0282704108525626	-2852.52684438639	-2847.85456599577	FALSE
K562.cells.TF.Footprints_BOCA	0.582067624598924	FALSE	FALSE	-0.0958917942751511	-2852.52684438639	-2847.1041392268	FALSE
ATAC.seq..Human.Neurons_BOCA	0.00726783513538817	TRUE	FALSE	0.0658835467235215	-2852.52684438639	-2854.10910071795	TRUE
ATAC.seq..Human.Glia_BOCA	0.368210338464093	FALSE	FALSE	0.0948790248129345	-2852.52684438639	-2847.61844389616	FALSE
Conserved.Element_BOCA	0.524042385728069	FALSE	FALSE	-0.00734965765767759	-2852.52684438639	-2847.20869300443	FALSE
