# Supplementary material for: Parallel functional testing identifies enhancers active in early postnatal mouse brain
Source: eLife journal article supplement (doi:10.7554/elife.69479), 2021-10-04
Supplement: supp [file elife-69479-supp-v1.zip › elife_poa_e69479_Supplementary_file_7.csv]

Amp_number	Name	Group2	Group	chr	position	SNP_ID	reference_base	Maxi_depth	Maxi_ref_freq	L1_DNA_depth	L1_DNA_ref_freq	L2_DNA_depth	L2_DNA_ref_freq	L3_DNA_depth	L3_DNA_ref_freq	L4_DNA_depth	L4_DNA_ref_freq	L1_RNA_depth	L1_RNA_ref_freq	L2_RNA_depth	L2_RNA_ref_freq	L3_RNA_depth	L3_RNA_ref_freq	L4_RNA_depth	L4_RNA_ref_freq	L4_High35_RNA_depth	L4_High35_RNA_ref_freq	Min_DNA_depth	Min_RNA_depth	Minor_allele_freq_threshold
45	45_Epilepsy	Epilepsy	GWAS	1	145789475	rs12744221	G	2735	0.9349177	5651	0.9971686	1686	0.9780546	2546	0.994894	1505	0.9840532	3519	0.9985791	84	1	2500	0.9984	45	1	803	0.9800747	TRUE	FALSE	FALSE
118	118_Epilepsy	Epilepsy	GWAS	1	186900940	rs12720541	G	5820	0.6147766	8789	0.3927637	2565	0.6124756	3277	0.819347	1997	0.6199299	3406	0.9812096	3688	0.04501085	15711	0.3591115	4024	0.5643638	3609	0.02188972	TRUE	TRUE	TRUE
120	120_Epilepsy	Epilepsy	GWAS	1	239806797	rs12059546	A	2160	0.7333333	6022	0.6986051	1539	0.7368421	2902	0.7236389	1412	0.6805949	4815	0.8074766	5801	0.7840028	55	0.8727273	2981	0.8242201	3300	0.8436364	TRUE	FALSE	TRUE
280	280_SZ108	SZ108	GWAS	1	243381524	rs1538774	G	3782	0.9992068	8626	0.9996522	1875	0.9994667	2733	1	1224	1	103	0.9902913	7030	0.9998578	73	1	1544	1	51	1	TRUE	FALSE	FALSE
281	281_SZ108	SZ108	GWAS	1	243391802	rs77149735	A	10155	0.9997046	5791	0.999482	3640	0.9997253	6391	1	3547	0.9997181	5969	0.9996649	4625	1	3825	1	1447	0.9993089	2499	0.9995998	TRUE	TRUE	FALSE
282	282_SZ108	SZ108	GWAS	1	243445664	rs6703335	C	4568	1	2469	1	1971	1	5488	0.9998178	1570	1	51	1	6889	0.9997097	39	1	22	1	31	1	TRUE	FALSE	FALSE
283	283_SZ108	SZ108	GWAS	1	243500590	rs14403	C	4097	0.9990237	5461	0.9996338	2604	1	4144	0.9997587	2409	1	4259	0.9997652	4634	1	9084	0.9994496	2975	1	1875	0.9989333	TRUE	TRUE	FALSE
267	267_SZ108	SZ108	GWAS	1	2455661	rs4648845	T	1034	1	962	1	194	1	438	1	255	1	173	1	37	1	376	1	29	1	98	1	FALSE	FALSE	FALSE
269	269_SZ108	SZ108	GWAS	1	29958712	rs1009080	A	32815	0.9997867	20557	0.9993676	13109	0.9996186	17542	0.999772	8820	0.9998866	7148	0.9993005	5586	1	267	1	5515	0.9992747	5438	1	TRUE	FALSE	FALSE
270	270_SZ108	SZ108	GWAS	1	29961103	rs1498232	A	53718	0.9991809	21907	0.9998174	21109	0.9995736	27190	0.9991909	17866	0.9996642	10667	0.99925	16725	0.9994021	10347	0.9989369	7953	0.999497	8198	0.9996341	TRUE	TRUE	FALSE
271	271_SZ108	SZ108	GWAS	1	43634412	rs11210892	C	5370	0.9998138	5108	0.9996085	2663	1	5739	0.9998258	2283	1	5991	1	3430	1	3998	1	2420	1	80	1	TRUE	FALSE	FALSE
272	272_SZ108	SZ108	GWAS	1	73302682	rs12129573	G	599	1	603	1	543	1	530	1	668	0.997006	2167	1	9	1	3	1	6	1	15	1	TRUE	FALSE	FALSE
273	273_SZ108	SZ108	GWAS	1	73359225	rs10789369	C	6836	0.998976	5240	0.9986641	3004	0.9983356	3802	0.9986849	2358	0.9987277	15651	0.998786	13909	0.9989216	17286	0.9998843	3473	0.9988483	5273	0.9990518	TRUE	TRUE	FALSE
268	268_SZ108	SZ108	GWAS	1	8362615	rs2252865	A	42500	0.9998118	14724	0.9999321	17887	0.999385	28541	0.9997547	15133	0.9996696	10111	0.9998022	12881	0.9998447	8070	0.9998761	6152	0.9996749	5515	0.999456	TRUE	TRUE	FALSE
275	275_SZ108	SZ108	GWAS	1	98037377	rs1625579	T	2067	1	5449	0.9992659	1176	1	1581	0.998735	1558	0.9993582	2867	1	3056	0.9993455	8135	0.9998771	498	1	2193	1	TRUE	FALSE	FALSE
276	276_SZ108	SZ108	GWAS	1	98087275	rs1198588	A	1539	1	3015	1	1243	1	2126	0.9995296	1106	1	40	1	32	1	7	1	1143	1	3	1	TRUE	FALSE	FALSE
348	348_SZ108	SZ108	GWAS	10	18445598	rs17691888	C	1194	0.9991625	2084	1	802	1	1985	0.9994962	654	1	42	0.9761905	47	1	5206	1	2267	1	44	1	TRUE	FALSE	FALSE
349	349_SZ108	SZ108	GWAS	10	18456175	rs7893279	T	21301	0.9999531	12611	0.9997621	9439	0.9994703	15298	0.9997385	10109	0.9998022	12129	0.9995878	11849	0.9997468	6472	0.9992274	6244	0.9996797	3245	0.9993837	TRUE	TRUE	FALSE
350	350_SZ108	SZ108	GWAS	10	60586879	rs16915157	A	5212	1	2249	1	2683	1	5058	0.9996046	2603	0.9996158	9017	0.9998891	12373	0.9997575	10152	0.9999015	8688	0.9998849	5996	0.9994997	TRUE	TRUE	FALSE
42	42_Epilepsy	Epilepsy	GWAS	11	102724404	rs1939012	T	1786	0.8516237	8002	0.5502374	1580	0.8658228	2258	0.908326	2079	0.8778259	1613	0.7619343	1356	0.9690265	2793	0.9957035	1531	0.8713259	3113	0.6344362	TRUE	TRUE	TRUE
358	358_SZ108	SZ108	GWAS	11	109507344	rs12421382	A	4666	0.9993571	4653	0.9995702	2425	0.9995876	4724	0.9993649	2594	0.9996145	4586	0.9993458	6166	1	7189	0.9990263	902	0.9988914	528	1	TRUE	FALSE	FALSE
359	359_SZ108	SZ108	GWAS	11	113522271	rs2514218	G	418	1	22	1	357	0.9971989	606	1	80	1	3274	0.9996946	23	1	11	1	9	1	12	1	FALSE	FALSE	FALSE
360	360_SZ108	SZ108	GWAS	11	123523927	rs77502336	G	188	1	21	1	113	1	709	1	346	1	550	1	1684	0.9964371	8	1	2	1	7	1	FALSE	FALSE	FALSE
361	361_SZ108	SZ108	GWAS	11	124744060	rs55661361	C	1781	1	3666	0.9997272	1170	1	1621	1	1034	1	2752	1	72	1	16	1	17	1	3201	1	TRUE	FALSE	FALSE
362	362_SZ108	SZ108	GWAS	11	125591813	rs548181	G	42447	0.999788	24384	1	18915	0.9996299	25581	0.9999609	16191	0.9998765	7651	0.9998693	15523	0.9998712	7524	0.9997342	6377	1	4357	1	TRUE	TRUE	FALSE
363	363_SZ108	SZ108	GWAS	11	130848734	rs10791097	A	2317	0.9995684	5743	0.9994776	1996	1	3673	0.9997277	2406	1	8450	0.9997633	8777	0.9998861	3608	1	1593	0.9993723	3266	1	TRUE	TRUE	FALSE
364	364_SZ108	SZ108	GWAS	11	130947683	rs7940866	C	2747	1	2518	1	1889	1	2396	1	2956	1	65	1	6200	0.9996774	51	1	4368	0.9997711	2532	1	TRUE	FALSE	FALSE
365	365_SZ108	SZ108	GWAS	11	130960852	rs10894294	T	5864	0.9976126	7288	1	3960	1	6858	0.9992709	3980	1	6411	1	16459	0.9996962	215	0.9953488	6135	0.999837	11917	0.9994126	TRUE	FALSE	FALSE
366	366_SZ108	SZ108	GWAS	11	133952673	rs75059851	T	25594	0.9996484	11506	0.9994785	9798	0.9998979	13737	0.999636	8290	0.9996381	182	1	230	1	3917	1	3222	0.9996896	101	1	TRUE	FALSE	FALSE
355	355_SZ108	SZ108	GWAS	11	17138600	rs4356203	C	1772	0.9994357	6528	0.9993873	1380	0.9992754	2734	0.9989027	1282	1	65	1	39	1	8	1	29	1	3	1	TRUE	FALSE	FALSE
356	356_SZ108	SZ108	GWAS	11	24382073	rs11027857	A	1101	0.9990917	36	1	898	1	3022	0.9996691	809	1	24	1	2744	0.9996356	30	1	7	1	11	1	FALSE	FALSE	FALSE
357	357_SZ108	SZ108	GWAS	11	57742821	rs9420	C	2822	1	2797	1	2101	0.999524	5840	1	2681	0.999254	72	1	2449	1	17	1	52	1	1396	1	TRUE	FALSE	FALSE
370	370_SZ108	SZ108	GWAS	12	103202676	rs10860964	C	7018	0.999715	14336	0.9999302	4314	1	7065	0.9997169	3752	0.999467	1895	1	3409	0.9997067	66	1	989	1	45	1	TRUE	FALSE	FALSE
246	246_NCASD	NCASD	FBDHS	12	121795289	bvb42	T	17118	0.9997079	10740	0.9997207	6833	0.9998537	9150	0.9998907	5707	0.9996496	148	1	754	1	72	1	1308	0.9992355	63	1	TRUE	FALSE	FALSE
372	372_SZ108	SZ108	GWAS	12	123180565	rs2851447	A	3241	0.9996915	6254	0.9996802	1611	1	4087	1	1663	1	3837	0.9997394	7006	0.9995718	3958	1	4631	0.9995681	4874	1	TRUE	TRUE	FALSE
373	373_SZ108	SZ108	GWAS	12	123246875	rs11532322	C	1185	0.9949367	1986	1	1114	0.9982047	1065	1	526	1	2294	1	17	1	4	1	16	1	16	1	TRUE	FALSE	FALSE
2	2_CACNA1C	CACNA1C	LD	12	2223227	rs4765904	A	9315	0.63489	8941	0.2872162	7435	0.5858776	12880	0.4299689	7449	0.5804806	2235	0.9463087	8472	0.1827195	6102	0.9919698	2249	0.6825256	7220	0.7418283	TRUE	TRUE	TRUE
2	2_CACNA1C	CACNA1C	LD	12	2223629	rs1108221	A	11439	0.6445493	9697	0.3024647	8300	0.6084337	14371	0.4513256	8592	0.6057961	2199	0.9404275	9278	0.1880793	7470	0.9937082	2382	0.6717045	8093	0.7575683	TRUE	TRUE	TRUE
2	2_CACNA1C	CACNA1C	LD	12	2223690	rs1108222	C	9517	0.6365451	7760	0.3078608	6506	0.6128189	11458	0.4526968	6932	0.6047317	1718	0.9417928	7764	0.1899794	6287	0.994433	1919	0.6722251	6813	0.7572288	TRUE	TRUE	TRUE
3	3_CACNA1C	CACNA1C	LD	12	2224505	rs1108075	G	11353	0.5776447	9563	0.6905783	7273	0.5322425	11364	0.5398627	6080	0.5965461	29700	0.6261953	35445	0.616053	21928	0.7377782	21599	0.6100282	20875	0.5461557	TRUE	TRUE	TRUE
3	3_CACNA1C	CACNA1C	LD	12	2225094	rs11062166	G	11655	0.5720292	10741	0.7068243	7353	0.5297158	12030	0.5288446	5812	0.5941156	31006	0.6189125	37495	0.6018136	25411	0.7249223	23474	0.6092698	23647	0.6045164	TRUE	TRUE	TRUE
4	4_CACNA1C	CACNA1C	LD	12	2231632	rs34382810	A	3004	0.1970706	7457	0.4665415	2573	0.1916051	5191	0.1119245	3193	0.09301597	2565	0.01208577	2415	0.01656315	3668	0.0008178844	869	0.01726122	2641	0.5441121	TRUE	FALSE	TRUE
4	4_CACNA1C	CACNA1C	LD	12	2232219	rs7965923	C	797	0.2961104	3132	0.4760536	798	0.3120301	1838	0.2072905	988	0.2105263	1142	0.9789842	638	0.06112853	1121	0.9884032	230	0.03478261	886	0.5722348	TRUE	FALSE	TRUE
5	5_CACNA1C	CACNA1C	LD	12	2235478	rs769087	G	21544	0.4279614	15221	0.3518823	15020	0.445739	18219	0.4457435	12416	0.4234053	15386	0.3207461	22833	0.4196996	14755	0.6908844	12491	0.245857	11479	0.5846328	TRUE	TRUE	TRUE
5	5_CACNA1C	CACNA1C	LD	12	2235794	rs2007044	A	31761	0.3726583	22299	0.3347235	22496	0.3834904	27880	0.4083572	18774	0.3771173	23245	0.307593	32102	0.314186	18821	0.5153286	18222	0.2698387	15915	0.5582784	TRUE	TRUE	TRUE
5	5_CACNA1C	CACNA1C	LD	12	2236129	rs1006737	G	23845	0.4208849	16628	0.3355184	16902	0.4395929	20002	0.4410559	13703	0.4010801	17731	0.259489	25090	0.4198087	16405	0.6905212	14288	0.2425112	12407	0.5603288	TRUE	TRUE	TRUE
6	6_CACNA1C	CACNA1C	LD	12	2237227	rs2159100	C	7128	0.7216611	6588	0.9234973	4906	0.7472483	10765	0.6614956	4380	0.7892694	22507	0.903008	21048	0.6937001	18110	0.3617338	12131	0.8433765	10065	0.6985594	TRUE	TRUE	TRUE
6	6_CACNA1C	CACNA1C	LD	12	2237664	rs12315711	T	6543	0.7178664	6306	0.9172217	4709	0.7092801	10348	0.6261113	4078	0.7690044	21508	0.8948763	19488	0.6751334	16869	0.3412176	11899	0.8239348	9701	0.6854963	TRUE	TRUE	TRUE
7	7_CACNA1C	CACNA1C	LD	12	2239678	rs11062170	G	6206	0.7160812	4904	0.7714111	3349	0.7530606	4595	0.7714908	2959	0.7597161	14752	0.8571719	16917	0.8421115	9862	0.7899006	8869	0.7741572	6081	0.7622102	TRUE	TRUE	TRUE
7	7_CACNA1C	CACNA1C	LD	12	2240418	rs4765905	G	14192	0.4320744	11384	0.43974	7667	0.4664145	10403	0.5150437	7213	0.3482601	29908	0.5284539	35682	0.4602601	20331	0.6203335	19471	0.4398336	14860	0.4660162	TRUE	TRUE	TRUE
8	8_CACNA1C	CACNA1C	LD	12	2246640	rs7297582	C	46788	0.6655553	26313	0.688481	29113	0.6762958	37158	0.6005705	24174	0.6546289	30002	0.7008533	35923	0.6932327	16940	0.6739669	21406	0.8126226	17909	0.7557653	TRUE	TRUE	TRUE
9	9_CACNA1C	CACNA1C	LD	12	2252294	rs758170	C	18944	0.626478	18312	0.69763	12807	0.6472242	18542	0.6110452	11536	0.5892857	25841	0.5765257	25966	0.7758993	13930	0.8216798	19060	0.5878279	19236	0.5791745	TRUE	TRUE	TRUE
10	10_CACNA1C	CACNA1C	LD	12	2259230	rs2370414	A	328	0.4359756	1106	0.7368897	292	0.3390411	684	0.2733918	301	0.372093	1007	0.4111221	552	0.4021739	576	0.003472222	12	0.08333333	13	0.07692308	FALSE	FALSE	TRUE
10	10_CACNA1C	CACNA1C	LD	12	2259508	rs10774035	C	1455	0.3965636	3251	0.7314672	1022	0.3679061	2189	0.3092736	920	0.3336957	3089	0.3813532	2000	0.45	2049	0.006344558	44	0.5227273	31	0.2903226	TRUE	FALSE	TRUE
11	11_CACNA1C	CACNA1C	LD	12	2264964	rs2239038	G	26955	0.5055463	18908	0.5528877	16295	0.4495244	20926	0.3922393	14568	0.4762493	21780	0.4133609	26461	0.3656324	12293	0.1296673	20663	0.2001161	13565	0.4272024	TRUE	TRUE	TRUE
12	12_CACNA1C	CACNA1C	LD	12	2274839	rs2238057	T	26107	0.3576052	15918	0.001947481	12723	0.1531085	17655	0.1521948	11284	0.235023	10354	0.1574271	12268	0.005461363	4062	0.01009355	9362	0.006729331	12185	0.002215839	TRUE	TRUE	FALSE
13	13_CACNA1C	CACNA1C	LD	12	2277782	rs10774036	C	17755	0.818361	14879	0.7335842	11861	0.841666	17896	0.7698927	10162	0.7782917	472	0.779661	5164	0.9947715	2866	0.9905792	4529	0.9931552	4941	0.8109694	TRUE	FALSE	TRUE
13	13_CACNA1C	CACNA1C	LD	12	2277933	rs10744560	C	19611	0.5016572	16290	0.4771025	13701	0.4908401	19905	0.3527254	11979	0.4881877	477	0.4004193	5722	0.9790283	3541	0.9776899	4827	0.263932	5513	0.0103392	TRUE	FALSE	TRUE
14	14_CACNA1C	CACNA1C	LD	12	2285615	rs12311439	A	31134	0.898985	24959	0.9757202	17059	0.8969459	23552	0.9178838	13381	0.898737	7855	0.9955442	13286	0.9967635	6134	0.5875448	7024	0.6832289	8261	0.9961264	TRUE	TRUE	FALSE
15	15_CACNA1C	CACNA1C	LD	12	2293080	rs1024582	A	20240	0.1045949	17424	0.2111455	12325	0.1268966	18304	0.03496503	10136	0.1009274	20502	0.001512048	20109	0.1066687	9836	0.001220008	10717	0.04880097	12554	0.1590728	TRUE	TRUE	FALSE
16	16_CACNA1C	CACNA1C	LD	12	2299028	rs4298967	A	10338	0.1825305	6827	0.5005127	8077	0.2135694	13299	0.1808407	6102	0.1781383	7732	0.2505173	10399	0.1829022	11998	0.1289382	6620	0.2773414	9972	0.7196149	TRUE	TRUE	TRUE
17	17_CACNA1C	CACNA1C	LD	12	2311211	rs4765914	T	956	0.6725941	512	0.9960938	1123	0.7266251	1907	0.9213424	950	0.8168421	26	1	4	0.5	6	0.6666667	2281	0.9995616	1	1	TRUE	FALSE	FALSE
17	17_CACNA1C	CACNA1C	LD	12	2311360	rs10774037	G	853	0.6682298	380	1	1011	0.7398615	1653	0.9165154	890	0.794382	29	0.9310345	5	0.8	2	0.5	1985	0.9984887	2	1	FALSE	FALSE	FALSE
18	18_CACNA1C	CACNA1C	LD	12	2408721	rs35407591	G	8668	0.3300646	13950	0.2958423	7060	0.3521246	10251	0.3150912	7231	0.314341	6722	0.09223445	7370	0.124152	7593	0.003029106	5465	0.6369625	2608	0.7565184	TRUE	TRUE	TRUE
18	18_CACNA1C	CACNA1C	LD	12	2409186	rs4765929	T	15371	0.3258083	20462	0.2931776	11845	0.3526382	17597	0.3133489	11596	0.3077785	11143	0.09010141	12365	0.1214719	9893	0.004548671	8313	0.6228798	4110	0.7491484	TRUE	TRUE	TRUE
18	18_CACNA1C	CACNA1C	LD	12	2409304	rs12422833	T	14150	0.2860777	19083	0.2459257	11326	0.2972806	16089	0.2736031	11089	0.2747768	10599	0.08576281	11656	0.004461222	9353	0.002459104	7856	0.5506619	3848	0.3825364	TRUE	TRUE	TRUE
19	19_CACNA1C	CACNA1C	LD	12	2409963	rs10774042	T	39912	0.6483263	17221	0.6302189	17338	0.6468451	24347	0.702222	12784	0.7076815	17636	0.8539351	18040	0.2955654	15053	0.3039926	30294	0.7947448	21928	0.7609449	TRUE	TRUE	TRUE
19	19_CACNA1C	CACNA1C	LD	12	2409975	rs11062217	G	41644	0.6703487	17823	0.6306458	18309	0.6717461	25582	0.7179658	13495	0.7520563	18459	0.8550842	18569	0.3774571	15571	0.2997881	31559	0.7868437	22729	0.7606582	TRUE	TRUE	TRUE
19	19_CACNA1C	CACNA1C	LD	12	2410192	rs11062218	C	39664	0.8054911	17470	0.7111048	18198	0.7785471	24754	0.8579623	12834	0.8712015	17741	0.9348402	17865	0.4810523	15319	0.3904955	30171	0.9762355	21896	0.8852758	TRUE	TRUE	TRUE
19	19_CACNA1C	CACNA1C	LD	12	2410249	rs66715687	A	41442	0.6959606	17991	0.6389306	18899	0.688502	25890	0.7407107	13441	0.7554497	18461	0.8677211	18111	0.3841864	15516	0.3192189	32142	0.8082571	23034	0.7259269	TRUE	TRUE	TRUE
19	19_CACNA1C	CACNA1C	LD	12	2410250	rs11062219	C	41426	0.8216579	17980	0.72703	18923	0.8000846	25943	0.8725282	13458	0.8829692	18505	0.9426641	18023	0.491816	15384	0.4216719	32240	0.9778536	23128	0.8971809	TRUE	TRUE	TRUE
19	19_CACNA1C	CACNA1C	LD	12	2410250	rs36113146	C	41426	0.8216579	17980	0.72703	18923	0.8000846	25943	0.8725282	13458	0.8829692	18505	0.9426641	18023	0.491816	15384	0.4216719	32240	0.9778536	23128	0.8971809	TRUE	TRUE	TRUE
20	20_CACNA1C	CACNA1C	LD	12	2411287	rs58017093	C	27851	0.8053212	17722	0.8843246	15669	0.8137724	21079	0.8099056	14001	0.8435826	18541	0.7497977	24016	0.7295553	7726	0.9896454	13061	0.9966312	13084	0.5995109	TRUE	TRUE	TRUE
20	20_CACNA1C	CACNA1C	LD	12	2411372	rs35167730	T	29805	0.7825868	19066	0.8742788	16873	0.7927458	22796	0.7963239	14939	0.8266952	19951	0.7477319	25745	0.7204117	8325	0.9901502	14207	0.9973253	14332	0.5941948	TRUE	TRUE	TRUE
20	20_CACNA1C	CACNA1C	LD	12	2411714	rs2887781	T	27195	0.7731201	17836	0.8745234	15409	0.7992083	20524	0.7989183	13216	0.8210502	19134	0.7552002	23799	0.7132653	7555	0.989411	13224	0.9961434	13291	0.5872395	TRUE	TRUE	TRUE
21	21_CACNA1C	CACNA1C	LD	12	2412413	rs55935819	G	13481	0.814628	17507	0.7650654	8332	0.7906865	13094	0.7599664	6947	0.8049518	9812	0.997554	10756	0.7797508	298	0.8456376	5191	0.6401464	5309	0.8462987	TRUE	FALSE	TRUE
21	21_CACNA1C	CACNA1C	LD	12	2412486	rs56144200	C	14052	0.8191716	18094	0.7692605	8741	0.7922435	13590	0.7568801	7336	0.8038441	10096	0.9974247	11012	0.7860516	291	0.8281787	5262	0.6315089	5450	0.8469725	TRUE	FALSE	TRUE
21	21_CACNA1C	CACNA1C	LD	12	2412646	rs17223841	A	8423	0.8140805	11308	0.7568978	4701	0.7932355	7639	0.7434219	3945	0.8073511	5795	0.9965487	6941	0.7874946	166	0.8433735	3220	0.6291925	3483	0.8530003	TRUE	FALSE	TRUE
21	21_CACNA1C	CACNA1C	LD	12	2412911	rs35124400	C	7442	0.8273314	9688	0.7791082	4626	0.8041505	6605	0.7623013	4260	0.8352113	4905	0.9959225	5570	0.7922801	172	0.8430233	2514	0.6654733	2681	0.8537859	TRUE	FALSE	TRUE
22	22_CACNA1C	CACNA1C	LD	12	2413815	rs7311607	A	10459	0.7522708	12743	0.5893432	7676	0.7804846	10000	0.7962	6775	0.677048	10646	0.9566974	13522	0.7121728	9246	0.9975124	7702	0.7760322	7720	0.9957254	TRUE	TRUE	TRUE
22	22_CACNA1C	CACNA1C	LD	12	2414068	rs146014566	G	18412	0.9997828	20620	0.999515	12726	0.9995285	17922	0.999721	11407	1	17277	0.9998842	20838	0.999808	12500	0.99976	11989	0.9996664	11855	0.9996626	TRUE	TRUE	FALSE
22	22_CACNA1C	CACNA1C	LD	12	2414128	rs146651349	A	20298	0.9933984	23444	0.9960758	14380	0.9959666	19941	0.9964896	12556	0.9941064	19357	0.9992767	23279	0.9968212	14300	0.9999301	13171	0.9955964	13071	0.9986229	TRUE	TRUE	FALSE
22	22_CACNA1C	CACNA1C	LD	12	2414189	rs7312105	A	20269	0.7564754	22649	0.5927414	13896	0.7629534	19437	0.7906055	12211	0.6604701	18410	0.9576317	22707	0.7068305	14075	0.9948135	12643	0.7722851	12588	0.9954719	TRUE	TRUE	TRUE
22	22_CACNA1C	CACNA1C	LD	12	2414204	rs7312107	A	19842	0.7625743	21887	0.6034176	13533	0.7715954	19048	0.799244	11929	0.6739039	18055	0.9582941	22129	0.7173392	13946	0.9951958	12484	0.7788369	12413	0.9961331	TRUE	TRUE	TRUE
22	22_CACNA1C	CACNA1C	LD	12	2414531	rs34533190	C	12188	0.6924844	14833	0.5666419	8718	0.7201193	11324	0.7349876	7295	0.606854	11623	0.9544008	14494	0.7112598	9127	0.9968226	8532	0.7666432	8118	0.9177137	TRUE	TRUE	TRUE
22	22_CACNA1C	CACNA1C	LD	12	2414606	rs16929368	T	9624	0.7749377	12095	0.6176106	7245	0.7914424	9090	0.8145215	6138	0.6826328	9341	0.9577133	12290	0.7200976	7629	0.9954122	7167	0.786382	6998	0.9921406	TRUE	TRUE	TRUE
367	367_SZ108	SZ108	GWAS	12	29764331	rs679087	A	2873	1	6493	0.999846	1815	0.9988981	2960	0.9993243	1599	1	7988	1	6869	0.9998544	3002	1	3195	1	3969	0.999748	TRUE	TRUE	FALSE
368	368_SZ108	SZ108	GWAS	12	57228587	rs12826178	A	919	1	1568	0.9993622	839	1	1721	1	662	1	900	1	45	1	8	1	415	0.9975904	2221	0.9995498	TRUE	FALSE	FALSE
377	377_SZ108	SZ108	GWAS	14	103580496	rs12887734	G	1341	0.9962714	198	0.9949495	1549	0.9974177	1593	0.9968613	814	0.9889435	8	1	16	0.9375	10	1	618	0.9967638	1147	0.9991282	FALSE	FALSE	FALSE
374	374_SZ108	SZ108	GWAS	14	29721109	rs2068012	G	1302	0.999232	90	1	997	1	1464	0.9979508	849	1	4227	0.9988171	5398	0.9998147	34	1	1476	0.9993225	811	1	FALSE	FALSE	FALSE
375	375_SZ108	SZ108	GWAS	14	71950608	rs2332700	A	6038	0.9998344	3431	0.9997085	2313	1	4264	1	2563	0.9984393	116	1	3799	0.9997368	11618	0.9998279	4759	1	1616	0.9993812	TRUE	FALSE	FALSE
376	376_SZ108	SZ108	GWAS	14	99252881	rs2693698	G	16154	0.9998762	12398	0.999758	7244	0.999862	14222	1	6532	0.9998469	3265	0.9996937	5993	0.9991657	6961	0.9998563	141	1	1947	1	TRUE	FALSE	FALSE
29	29_Epilepsy	Epilepsy	GWAS	15	30606129	rs143536437	C	17721	0.9299701	12495	0.9993597	9852	0.9493504	14615	0.916661	6594	0.9657264	5676	0.9978858	9002	0.9990002	219	0.9452055	3441	0.9994188	1809	0.9977888	TRUE	FALSE	FALSE
378	378_SZ108	SZ108	GWAS	15	40275035	rs56205728	C	5377	0.999628	5352	0.9998132	3956	1	5467	1	3739	0.9997325	67	1	30	1	29	1	2589	0.9996138	12	1	TRUE	FALSE	FALSE
380	380_SZ108	SZ108	GWAS	15	61547903	rs4775413	G	8378	1	8969	1	4148	0.9995178	7142	0.99986	4326	0.9997688	7082	0.9998588	9291	0.9995695	4109	1	1360	0.9992647	130	1	TRUE	FALSE	FALSE
381	381_SZ108	SZ108	GWAS	15	61562463	rs12903146	G	15642	0.9998721	14232	0.9997892	7600	0.9998684	9712	0.999897	6176	0.9998381	11690	0.9998289	13405	0.9998508	6537	0.9993881	5653	1	9095	0.9995602	TRUE	TRUE	FALSE
382	382_SZ108	SZ108	GWAS	15	70296932	rs12148337	T	19894	0.9998492	19387	0.9997421	7853	0.999618	10448	0.9999043	6210	1	2706	0.9996305	19024	0.9995269	12225	0.9997546	8338	0.9995203	9015	0.9998891	TRUE	TRUE	FALSE
384	384_SZ108	SZ108	GWAS	15	84037708	rs950169	A	18059	0.9998893	13281	0.9996988	6922	0.9994221	9477	0.9998945	6920	0.9992775	7777	0.9997428	9886	0.9992919	3976	1	4005	1	1345	1	TRUE	TRUE	FALSE
247	247_NCASD	NCASD	FBDHS	15	98580836	bvb28	G	15926	0.9999372	15544	0.9997427	8452	0.9996451	12191	0.9996719	8100	0.9997531	22389	1	23867	0.9998743	18493	0.9999459	24108	0.9998341	22479	0.9997776	TRUE	TRUE	FALSE
248	248_NCASD	NCASD	FBDHS	16	13455583	mw22	A	994	1	6427	0.9998444	733	1	1063	1	1435	1	38	1	33	1	10	1	27	1	2	1	TRUE	FALSE	FALSE
387	387_SZ108	SZ108	GWAS	16	13656001	rs7405404	T	277	1	44	1	207	1	640	1	211	0.9952607	4072	1	52	1	2118	0.9995279	752	0.9986702	32	1	FALSE	FALSE	FALSE
390	390_SZ108	SZ108	GWAS	16	68155436	rs8044995	T	2785	1	198	1	1547	0.9993536	3594	0.9997218	1864	1	4426	0.9997741	2121	1	39	1	726	1	42	1	FALSE	FALSE	FALSE
177	177_NCASD	NCASD	FBDHS	16	6859669	SNDHS216863	A	13793	0.999855	11789	0.9997455	7128	0.9997194	10293	1	6590	1	20085	0.9999004	24459	0.9997138	26330	0.9998861	12003	0.9999167	10953	0.9996348	TRUE	TRUE	FALSE
177	177_NCASD	NCASD	FBDHS	16	6860109	SNDHS216864	T	34787	0.99977	31037	0.99971	17648	0.9998867	24436	0.9998772	17249	0.9997681	25903	0.999807	38411	0.9996616	27743	0.9997116	19191	0.9996352	19053	0.9999475	TRUE	TRUE	FALSE
178	178_NCASD	NCASD	FBDHS	16	6860329	SNDHS216865	T	29461	0.9998982	25067	0.9998803	12582	0.9995231	18685	0.999893	12605	0.9998413	11193	0.9998213	23403	0.9998718	6777	0.9998524	10768	1	11501	0.9999131	TRUE	TRUE	FALSE
179	179_NCASD	NCASD	FBDHS	16	6861769	SNDHS216866	C	6797	0.9997058	4370	0.9997712	2613	0.9988519	3822	0.9994767	2726	1	4003	0.9995004	7043	0.999574	80	1	3096	0.999354	1670	1	TRUE	FALSE	FALSE
180	180_NCASD	NCASD	FBDHS	16	6862249	SNDHS216867	G	15020	0.9998668	7904	0.9998735	5675	0.9996476	7837	0.9998724	5590	0.9998211	4389	1	7252	1	131	1	5701	1	1815	0.999449	TRUE	FALSE	FALSE
180	180_NCASD	NCASD	FBDHS	16	6862429	SNDHS216868	C	12436	0.9998392	7041	1	5034	1	6811	0.9997064	4896	0.9993873	4002	1	6235	0.9996792	106	1	5005	1	1678	0.9994041	TRUE	FALSE	FALSE
181	181_NCASD	NCASD	FBDHS	16	6863389	SNDHS216869	G	2792	1	7165	1	1024	1	1753	0.9988591	1819	0.9994502	51	1	33	1	10	1	29	1	4	1	TRUE	FALSE	FALSE
182	182_NCASD	NCASD	FBDHS	16	6869909	SNDHS216870	C	15299	0.9998693	15252	0.9998033	7819	1	11232	0.999911	7420	0.9994609	19730	0.9996452	28141	0.9998579	21352	0.9997658	21137	0.9996688	18602	0.9998925	TRUE	TRUE	FALSE
182	182_NCASD	NCASD	FBDHS	16	6870409	SNDHS216871	T	11429	0.9997375	12968	0.9998458	6389	1	8644	0.9995373	5998	1	16707	0.9998803	23719	0.9998314	16604	0.9998795	19109	0.9998953	16972	0.9998822	TRUE	TRUE	FALSE
183	183_NCASD	NCASD	FBDHS	16	6878089	SNDHS216872	T	9203	0.9998913	8779	0.9997722	5079	0.9998031	10130	0.9997038	5141	0.9994165	4026	0.9992548	15887	0.9998741	14525	0.9998623	7470	1	5671	0.9998237	TRUE	TRUE	FALSE
184	184_NCASD	NCASD	FBDHS	16	6883709	SNDHS216873	A	10866	0.9998159	11644	0.9997424	5310	0.9998117	7181	0.999443	5065	0.9994077	6511	0.9996928	11220	0.9997326	5111	1	3177	0.9993705	2392	0.9995819	TRUE	TRUE	FALSE
185	185_NCASD	NCASD	FBDHS	16	6884269	SNDHS216874	C	23685	0.9998733	19731	1	13713	0.9997812	20635	0.9998546	12497	1	14658	1	17120	0.9999416	656	1	7875	0.999873	5798	1	TRUE	FALSE	FALSE
186	186_NCASD	NCASD	FBDHS	16	6888429	SNDHS216875	T	4665	0.9997856	9387	1	2974	1	5151	0.9996117	3931	1	3285	1	6308	0.9992074	5019	1	1352	1	762	1	TRUE	FALSE	FALSE
186	186_NCASD	NCASD	FBDHS	16	6888869	SNDHS216876	C	3062	1	6603	0.9996971	2090	1	3430	1	2733	0.9985364	2309	1	4163	0.9997598	3585	1	875	1	486	1	TRUE	FALSE	FALSE
187	187_NCASD	NCASD	FBDHS	16	6891789	SNDHS216877	C	20618	0.9997575	14372	0.9995825	10200	0.9995098	14730	0.9997963	8433	0.9990513	15512	0.9996777	17915	0.9996093	15235	0.9999344	7884	0.9996195	7007	0.9997146	TRUE	TRUE	FALSE
187	187_NCASD	NCASD	FBDHS	16	6892069	SNDHS216878	A	17403	0.9998851	13457	0.9997771	9449	0.9995767	13025	0.9996161	7632	0.9994759	14033	0.9998575	16017	0.9996254	14910	0.9997317	6914	1	6212	0.9995171	TRUE	TRUE	FALSE
188	188_NCASD	NCASD	FBDHS	16	6893349	SNDHS216879	C	15926	0.9999372	18587	0.9999462	7125	1	9410	0.9998937	5973	1	4187	1	11541	1	19695	0.9998985	4753	1	12581	0.9999205	TRUE	TRUE	FALSE
188	188_NCASD	NCASD	FBDHS	16	6893609	SNDHS216880	T	11206	0.9994646	13061	0.9997703	5324	0.9998122	6887	0.9994192	4619	1	3116	1	8127	0.9996309	15096	0.999735	3495	0.9994278	8959	0.9998884	TRUE	TRUE	FALSE
189	189_NCASD	NCASD	FBDHS	16	6895029	SNDHS216881	C	3352	1	1363	1	1662	1	3551	0.9994368	2114	1	6015	0.9998337	6300	1	3555	1	8205	1	10997	1	TRUE	TRUE	FALSE
190	190_NCASD	NCASD	FBDHS	16	6897829	SNDHS216882	T	17251	0.999942	15780	0.9998733	8992	1	12445	0.9996786	6758	0.999852	8365	0.9997609	6591	1	4201	0.9995239	9994	0.9995998	12398	0.9998387	TRUE	TRUE	FALSE
191	191_NCASD	NCASD	FBDHS	16	6901109	SNDHS216883	T	28107	0.9998577	15661	0.9998723	13457	0.9997028	18683	0.9997859	12210	0.9999181	24485	0.9998775	25586	0.9999609	11751	1	17935	0.9996655	15436	0.9999352	TRUE	TRUE	FALSE
192	192_NCASD	NCASD	FBDHS	16	6901969	SNDHS216884	G	15337	0.9999348	15176	0.9998682	7498	0.9997333	13047	0.9994635	7987	1	9555	0.999686	2588	0.9992272	15248	0.9996721	2458	1	5358	1	TRUE	TRUE	FALSE
193	193_NCASD	NCASD	FBDHS	16	6904049	SNDHS216885	A	21338	0.9996719	16789	0.9997617	10008	0.9997002	13058	0.9997703	9675	0.9996899	32862	0.999787	33964	0.999735	16506	0.9997577	16337	0.9997552	18698	0.9998396	TRUE	TRUE	FALSE
194	194_NCASD	NCASD	FBDHS	16	6904949	SNDHS216886	A	1417	0.9985886	4635	1	936	1	733	1	1407	1	35	1	1561	1	9	1	251	1	9	1	TRUE	FALSE	FALSE
195	195_NCASD	NCASD	FBDHS	16	6905849	SNDHS216887	G	25163	0.9999205	23849	0.9999161	11582	0.9999137	18942	1	11178	0.9997316	20069	0.9998007	14146	0.9997879	7663	1	6921	0.9995665	5837	1	TRUE	TRUE	FALSE
195	195_NCASD	NCASD	FBDHS	16	6906109	SNDHS216888	A	18612	0.9997851	16999	0.9995294	7867	0.9996187	12851	0.9867715	7150	0.9997203	14847	0.9997306	10657	0.9996247	5667	1	5204	0.9994235	4603	0.9995655	TRUE	TRUE	FALSE
196	196_NCASD	NCASD	FBDHS	16	6912409	SNDHS216889	C	1332	1	102	1	1331	1	2676	0.9992526	1480	0.9986486	4757	1	7341	0.9995913	40	1	26	1	43	1	FALSE	FALSE	FALSE
197	197_NCASD	NCASD	FBDHS	16	6913849	SNDHS216890	T	18454	0.9997832	11894	0.9995796	8259	1	12404	0.9992744	7425	1	24400	0.999959	29506	0.9997967	16226	0.9997535	12595	0.9998412	18597	0.9998925	TRUE	TRUE	FALSE
197	197_NCASD	NCASD	FBDHS	16	6914169	SNDHS216891	T	11795	0.9999152	6981	0.9997135	5012	0.9998005	6563	0.9998476	4667	0.9993572	15406	0.9997404	20917	0.9998566	14488	0.999862	7337	0.9994548	12487	0.9996797	TRUE	TRUE	FALSE
198	198_NCASD	NCASD	FBDHS	16	6915249	SNDHS216892	C	2409	1	1037	1	1953	1	3799	0.9997368	2459	1	21	1	2110	1	26	1	22	1	20	1	TRUE	FALSE	FALSE
202	202_NCASD	NCASD	FBDHS	16	6928229	SNDHS216896	T	21056	0.9996201	10955	0.9989046	7797	0.9993587	12295	0.999756	5694	0.9991219	22805	0.9660601	27919	0.9995344	9786	0.9991825	11078	0.9995487	9418	0.9996815	TRUE	TRUE	FALSE
203	203_NCASD	NCASD	FBDHS	16	6929169	SNDHS216897	T	7210	0.9998613	7407	0.99973	3402	1	5833	0.9996571	3663	0.999454	5366	0.9998136	5329	1	82	1	3800	1	1325	1	TRUE	FALSE	FALSE
203	203_NCASD	NCASD	FBDHS	16	6929549	SNDHS216898	T	5110	1	5209	1	2642	1	4002	1	2763	1	3812	0.9997377	3867	0.9997414	75	1	3143	1	1090	1	TRUE	FALSE	FALSE
204	204_NCASD	NCASD	FBDHS	16	6935809	SNDHS216899	T	17576	0.9997724	14360	1	9369	0.9998933	13188	0.9998483	8699	1	8089	0.9998764	14554	0.9998626	19240	0.9996881	13856	0.9991339	13808	1	TRUE	TRUE	FALSE
204	204_NCASD	NCASD	FBDHS	16	6936049	SNDHS216900	G	16402	0.9998781	13937	0.9998565	9215	0.999783	12725	0.9999214	8489	1	7920	0.9994949	13596	1	18253	0.9998904	12931	0.9998453	12914	0.9996903	TRUE	TRUE	FALSE
205	205_NCASD	NCASD	FBDHS	16	6936609	SNDHS216901	T	1223	1	1479	1	986	0.9979716	2208	0.9986413	876	1	4533	0.9997794	2298	0.9991297	10459	0.9978965	3396	1	2059	1	TRUE	TRUE	FALSE
206	206_NCASD	NCASD	FBDHS	16	6946289	SNDHS216902	G	9489	0.9996838	13550	0.9998524	6941	1	10481	0.9997138	6326	0.9992096	2930	1	8031	0.9998755	10874	1	802	1	182	0.9945055	TRUE	FALSE	FALSE
208	208_NCASD	NCASD	FBDHS	16	6949529	SNDHS216905	T	8810	1	10651	0.9995306	5524	0.999819	10603	0.9996227	5084	0.9994099	7826	0.9996167	7283	0.9987642	513	0.9961014	14674	0.999523	6002	0.9996668	TRUE	FALSE	FALSE
209	209_NCASD	NCASD	FBDHS	16	6957909	SNDHS216906	G	304	1	27	1	329	1	503	1	199	1	1	1	4836	0.9997932	9	1	2	1	14	1	FALSE	FALSE	FALSE
209	209_NCASD	NCASD	FBDHS	16	6958069	SNDHS216907	C	232	1	14	1	217	1	312	1	106	1	3	1	3350	1	4	1	5	1	16	1	FALSE	FALSE	FALSE
209	209_NCASD	NCASD	FBDHS	16	6958349	SNDHS216908	G	346	1	2196	1	345	1	251	1	411	1	12	1	2704	0.9996302	7	1	3	1	6	1	FALSE	FALSE	FALSE
210	210_NCASD	NCASD	FBDHS	16	6958689	SNDHS216909	C	181	1	2392	0.9995819	177	1	4	1	288	1	13	1	8	1	1	1	7	1	1	1	FALSE	FALSE	FALSE
212	212_NCASD	NCASD	FBDHS	16	6968349	SNDHS216911	C	3895	0.9992298	7327	0.9998635	1478	1	1637	0.9993891	1955	0.9994885	2982	1	3056	1	3930	0.9997455	60	1	1726	1	TRUE	FALSE	FALSE
213	213_NCASD	NCASD	FBDHS	16	6969849	SNDHS216912	A	7675	1	15375	0.9997398	4287	0.9995335	6175	0.9995142	4969	0.9995975	29253	0.9997607	34189	0.9997075	17919	0.9998884	18892	0.9998941	10069	1	TRUE	TRUE	FALSE
214	214_NCASD	NCASD	FBDHS	16	6971629	SNDHS216913	A	4948	0.9995958	3145	0.999682	2770	0.999639	5133	0.9994155	2746	0.9996358	87	1	52	1	2495	1	320	1	23	1	TRUE	FALSE	FALSE
215	215_NCASD	NCASD	FBDHS	16	6972109	SNDHS216914	C	7205	1	4726	1	3471	0.9997119	6941	0.9995678	2788	0.9992826	87	1	107	1	3857	1	459	1	42	1	TRUE	FALSE	FALSE
216	216_NCASD	NCASD	FBDHS	16	6973649	SNDHS216915	A	1339	0.9985063	2786	0.9996411	410	1	564	1	490	1	3130	1	3776	0.9997352	29	1	647	0.9984544	65	1	FALSE	FALSE	FALSE
217	217_NCASD	NCASD	FBDHS	16	6975069	SNDHS216916	A	296	1	22	1	298	1	1024	1	367	1	2	1	1651	0.9993943	36	1	6	1	3	1	FALSE	FALSE	FALSE
220	220_NCASD	NCASD	FBDHS	16	6982429	SNDHS216919	G	7541	0.0001326084	4878	0.0002050021	4898	0.000204165	9055	0	4105	0	5073	0	14831	0.000202279	214	0	2017	0	4445	0	TRUE	FALSE	FALSE
221	221_NCASD	NCASD	FBDHS	16	6983349	SNDHS216920	A	930	1	55	1	986	1	1650	1	1314	1	14	1	15	1	5	1	558	1	2	1	FALSE	FALSE	FALSE
221	221_NCASD	NCASD	FBDHS	16	6983669	SNDHS216921	C	1185	1	48	0.9791667	1440	1	2395	1	1797	1	95	1	117	1	11	1	599	1	35	1	FALSE	FALSE	FALSE
222	222_NCASD	NCASD	FBDHS	16	6993849	SNDHS216922	A	2658	1	848	0.9988208	1635	1	2527	1	1903	1	47	1	178	1	15	1	1765	0.9994334	2678	0.9992532	TRUE	FALSE	FALSE
222	222_NCASD	NCASD	FBDHS	16	6994109	SNDHS216923	C	2367	1	746	1	1542	1	2445	0.999591	1663	1	43	1	136	1	17	1	1726	1	2727	1	TRUE	FALSE	FALSE
223	223_NCASD	NCASD	FBDHS	16	7007209	SNDHS216924	C	33299	0.9999099	23888	0.9998326	15846	0.9998107	22501	0.9999111	13629	0.9971385	14552	1	7590	1	4978	1	4037	1	4623	0.9997837	TRUE	TRUE	FALSE
224	224_NCASD	NCASD	FBDHS	16	7009429	SNDHS216925	G	754	1	81	1	587	1	1923	1	1180	1	3092	1	7814	0.999872	84	1	140	1	66	1	FALSE	FALSE	FALSE
225	225_NCASD	NCASD	FBDHS	16	7010249	SNDHS216926	A	2873	1	9402	1	2133	1	5415	0.9998153	2381	0.99958	129	1	2327	1	68	1	410	1	12	1	TRUE	FALSE	FALSE
226	226_NCASD	NCASD	FBDHS	16	7013269	SNDHS216927	G	12554	0.9998407	11397	0.9999123	5526	1	7416	0.9998652	4604	1	10025	0.9998005	13456	0.9997771	8538	1	4755	0.9997897	8993	0.9998888	TRUE	TRUE	FALSE
227	227_NCASD	NCASD	FBDHS	16	7014229	SNDHS216928	G	4272	0.9995318	4436	0.9995491	2585	1	5548	0.9998198	2073	1	2133	1	1628	1	2326	0.9991402	637	1	56	1	TRUE	FALSE	FALSE
228	228_NCASD	NCASD	FBDHS	16	7016909	SNDHS216929	A	18443	0.9999458	19004	0.9997895	10902	0.9995414	16490	0.9996968	9688	0.9997936	18873	0.9997881	24133	0.9998343	15705	0.999809	14202	0.9997888	14385	0.999861	TRUE	TRUE	FALSE
229	229_NCASD	NCASD	FBDHS	16	7017589	SNDHS216930	C	11517	0.9998263	13048	0.9998467	5941	0.9991584	10585	0.9541804	6475	0.9996911	18408	0.999837	14164	0.9999294	13257	0.9999246	10975	1	10453	0.9998087	TRUE	TRUE	FALSE
230	230_NCASD	NCASD	FBDHS	16	7025909	SNDHS216931	G	4072	1	5924	0.9998312	3163	1	6346	0.9998424	1983	0.9989914	3220	1	97	1	29	1	1270	1	2063	0.9990305	TRUE	FALSE	FALSE
230	230_NCASD	NCASD	FBDHS	16	7026069	SNDHS216932	T	3952	1	6440	0.9998447	3472	0.999712	6464	0.9998453	2155	1	3307	1	87	1	31	1	1232	0.9991883	2021	1	TRUE	FALSE	FALSE
231	231_NCASD	NCASD	FBDHS	16	7027129	SNDHS216933	T	6456	0.9995353	9856	0.9998985	4059	0.9997536	6457	0.9996903	4110	0.9992701	4884	0.9997952	6073	0.9998353	7986	1	3715	1	3179	1	TRUE	TRUE	FALSE
231	231_NCASD	NCASD	FBDHS	16	7027749	SNDHS216934	T	2469	0.999595	5289	1	1519	1	2668	0.9992504	1432	0.9993017	2215	0.9990971	3190	0.9996865	4277	1	2086	0.9995206	1637	1	TRUE	TRUE	FALSE
232	232_NCASD	NCASD	FBDHS	16	7028329	SNDHS216935	C	8061	1	10658	0.9997185	3113	0.9996788	7284	0.9998627	2650	0.9988679	9504	0.9998948	5081	1	4663	0.9993566	988	0.9989879	1659	1	TRUE	FALSE	FALSE
25	25_Epilepsy	Epilepsy	GWAS	16	8467743	rs11861787	A	11891	0.9998318	13302	0.9997745	8114	0.9998768	14565	0.9996567	7732	0.9993533	14066	0.9998578	12785	0.9998436	149	1	4188	0.9997612	3860	0.9997409	TRUE	FALSE	FALSE
386	386_SZ108	SZ108	GWAS	16	9852461	rs9922678	C	11060	0.9997288	4443	1	4019	1	8359	1	3857	0.9992222	106	1	151	1	4881	1	1073	1	3241	0.9996915	TRUE	FALSE	FALSE
392	392_SZ108	SZ108	GWAS	17	18055087	rs8082590	C	5716	0.9783065	4076	0.9997547	4078	0.9914174	3774	0.9970853	2722	0.994122	6627	0.9992455	6747	0.9995554	60	1	66	1	98	1	TRUE	FALSE	FALSE
249	249_NCASD	NCASD	FBDHS	17	40130601	mw29	A	6952	1	2476	1	4169	0.9997601	8098	0.999753	3376	1	3543	0.9997178	6103	0.9998361	71	1	974	0.9979466	2430	1	TRUE	FALSE	FALSE
32	32_Epilepsy	Epilepsy	GWAS	17	48045642	rs72823592	G	54	1	7	1	53	1	3	1	29	1	894	1	756	1	1	1	22	1	212	1	FALSE	FALSE	FALSE
393	393_SZ108	SZ108	GWAS	18	55084785	rs12966547	G	1270	1	2650	0.9996226	987	1	1685	1	1245	1	2498	1	6979	0.9994269	3102	0.9993553	671	1	1478	1	TRUE	FALSE	FALSE
394	394_SZ108	SZ108	GWAS	18	55085468	rs4801131	A	9693	0.9992778	9369	0.9997865	3483	1	6705	0.9998509	3605	0.9997226	10736	0.9997206	13742	0.9998545	8159	0.9998774	2348	0.9995741	5160	0.9996124	TRUE	TRUE	FALSE
395	395_SZ108	SZ108	GWAS	18	55527729	rs17512836	A	2873	0.9996519	2233	0.9995522	1158	0.9991364	1681	1	1451	1	9000	1	12362	1	313	1	6010	0.9998336	5658	0.9998233	TRUE	FALSE	FALSE
396	396_SZ108	SZ108	GWAS	18	55532885	rs9636107	A	2657	0.9992473	74	1	1680	1	2350	1	1831	0.9994539	51	1	3071	1	13947	0.9997132	3324	1	272	0.9963235	FALSE	FALSE	FALSE
397	397_SZ108	SZ108	GWAS	18	55865957	rs72934570	T	1123	1	4206	1	999	1	2370	0.9991561	1541	0.9993511	3373	0.9994071	57	1	22	1	787	1	2487	0.9995979	TRUE	FALSE	FALSE
399	399_SZ108	SZ108	GWAS	19	19367212	rs2905426	T	29109	0.9998626	15900	0.9998742	13841	0.9998555	22620	0.9996905	12843	0.9997664	12934	0.9999227	13011	0.9997694	3999	0.9992498	5963	0.9998323	3190	0.9996865	TRUE	TRUE	FALSE
44	44_Epilepsy	Epilepsy	GWAS	2	144602342	rs10496964	C	3569	1	11064	1	3525	1	4918	1	3494	1	6085	1	5154	1	5480	0.999635	1168	1	381	1	TRUE	FALSE	FALSE
121	121_NCASD	NCASD	FBDHS	2	148301021	SNDHS323128	C	1527	0.9986902	2498	1	1028	1	2555	0.9996086	1035	1	5064	1	5552	0.9998199	7259	0.9998622	5093	1	6521	1	TRUE	TRUE	FALSE
122	122_NCASD	NCASD	FBDHS	2	148303501	SNDHS323129	T	158	1	21	1	135	1	183	1	47	1	999	1	2044	1	5369	0.9998137	119	1	1023	1	FALSE	FALSE	FALSE
123	123_NCASD	NCASD	FBDHS	2	148304121	SNDHS323130	T	1695	1	2727	1	1029	0.9970845	1541	1	975	1	30	1	1450	1	6	1	600	1	524	1	TRUE	FALSE	FALSE
123	123_NCASD	NCASD	FBDHS	2	148304481	SNDHS323131	A	1879	1	2804	1	929	1	1576	1	832	1	40	1	1665	0.9993994	12	1	519	1	581	1	TRUE	FALSE	FALSE
124	124_NCASD	NCASD	FBDHS	2	148305941	SNDHS323132	C	2690	1	4707	0.9989378	1649	0.9993936	2164	1	1684	0.9988124	6929	0.9998557	6658	0.9996996	2025	1	1999	1	1684	1	TRUE	TRUE	FALSE
125	125_NCASD	NCASD	FBDHS	2	148306281	SNDHS323133	G	1007	1	48	1	745	1	502	1	1140	1	18	1	4851	0.9997939	24	1	641	0.9984399	879	0.9988623	FALSE	FALSE	FALSE
288	288_SZ108	SZ108	GWAS	2	161989344	rs2909457	C	4630	0.9937365	8619	0.9996519	2608	0.9980828	4791	0.9995826	2489	1	4127	1	63	1	16	1	86	1	17	1	TRUE	FALSE	FALSE
126	126_NCASD	NCASD	FBDHS	2	165401600	SNDHS327275	A	7400	0.9998649	6871	1	3028	0.9996697	5062	0.9996049	2639	1	6444	1	5929	0.9996627	2913	0.9996567	1628	1	1755	1	TRUE	TRUE	FALSE
127	127_NCASD	NCASD	FBDHS	2	165402460	SNDHS327276	A	3727	0.9991951	5643	0.9996456	2318	0.9995686	3702	1	2896	0.9996547	16210	0.9999383	13274	0.999774	4601	0.9997827	14529	0.9997935	15500	0.9996129	TRUE	TRUE	FALSE
128	128_NCASD	NCASD	FBDHS	2	165406640	SNDHS327277	T	3911	0.9997443	2762	0.9996379	2730	1	3811	1	3494	1	7330	0.9994543	1844	0.9978308	23	1	304	1	118	1	TRUE	FALSE	FALSE
129	129_NCASD	NCASD	FBDHS	2	165410540	SNDHS327278	A	1765	1	3886	1	1524	1	1988	1	1782	1	1487	1	4558	0.9997806	6638	1	1525	1	639	0.9984351	TRUE	FALSE	FALSE
130	130_NCASD	NCASD	FBDHS	2	165420380	SNDHS327279	A	4335	0.999308	7944	0.9998741	2575	1	4024	0.9997515	3516	0.9997156	4538	0.9997796	4211	1	9320	1	1138	1	1536	1	TRUE	TRUE	FALSE
131	131_NCASD	NCASD	FBDHS	2	165424920	SNDHS327280	A	6960	0.999569	4166	1	3313	1	6774	0.9998524	3482	1	20969	0.9999046	27960	0.9998569	12086	0.9992553	11750	0.9997447	9235	0.9991337	TRUE	TRUE	FALSE
132	132_NCASD	NCASD	FBDHS	2	165429240	SNDHS327281	C	608	1	3298	0.9990904	663	1	1068	0.997191	844	0.9988152	3872	1	3451	0.9982614	24	1	182	1	50	1	TRUE	FALSE	FALSE
134	134_NCASD	NCASD	FBDHS	2	165440660	SNDHS327283	A	3992	1	8727	1	2709	0.9996309	4217	1	3157	0.9996832	20544	0.9999026	18436	0.999783	16556	0.9998188	8893	0.9998876	11347	0.9999119	TRUE	TRUE	FALSE
135	135_NCASD	NCASD	FBDHS	2	165448160	SNDHS327284	G	5803	1	5147	0.9996114	3591	0.9994431	4091	1	3745	1	5618	1	5929	1	4770	1	1508	0.9993369	488	1	TRUE	FALSE	FALSE
136	136_NCASD	NCASD	FBDHS	2	165450480	SNDHS327285	A	2114	0.999527	5157	1	1286	0.9992224	1403	1	1079	1	5505	1	6361	1	2323	0.9995695	1813	0.9988969	2415	1	TRUE	TRUE	FALSE
137	137_NCASD	NCASD	FBDHS	2	165451980	SNDHS327286	C	810	1	1682	0.9994055	739	1	1457	1	827	1	4294	1	12351	0.999919	126	1	2818	0.9996451	1465	1	TRUE	FALSE	FALSE
138	138_NCASD	NCASD	FBDHS	2	165452700	SNDHS327287	A	2426	1	11412	0.9993866	2495	1	5080	1	3120	1	6326	0.9998419	6638	0.9996987	10294	1	4361	1	3959	1	TRUE	TRUE	FALSE
138	138_NCASD	NCASD	FBDHS	2	165453140	SNDHS327288	T	8382	0.9997614	16358	0.9998777	4749	1	9239	0.9998918	5174	1	8902	1	11795	0.9998304	11498	0.999913	5341	1	5407	1	TRUE	TRUE	FALSE
139	139_NCASD	NCASD	FBDHS	2	165453380	SNDHS327289	T	6576	0.9996959	7259	0.9997245	2642	0.9996215	5430	0.9998158	2928	0.9993169	3441	0.9994188	6978	0.9994268	3139	0.9990443	980	1	1864	1	TRUE	FALSE	FALSE
140	140_NCASD	NCASD	FBDHS	2	165453880	SNDHS327290	A	1896	0.9994726	3003	0.999001	1446	0.9993084	3218	0.9996892	1034	0.9990329	4384	0.9997719	7288	0.9997256	9133	0.9992335	12446	0.9998393	11978	0.999833	TRUE	TRUE	FALSE
140	140_NCASD	NCASD	FBDHS	2	165454040	SNDHS327291	A	1685	1	2482	0.9995971	1119	1	2454	1	769	1	3509	1	7249	0.9997241	9675	0.9996899	10867	0.999816	11436	1	TRUE	TRUE	FALSE
140	140_NCASD	NCASD	FBDHS	2	165454280	SNDHS327292	A	802	0.9987531	1211	1	600	1	1276	1	420	1	2161	1	4194	0.9992847	6041	0.9998345	7433	0.9998655	7804	0.9998719	FALSE	TRUE	FALSE
141	141_NCASD	NCASD	FBDHS	2	165462500	SNDHS327293	A	7583	1	9082	0.9993394	4457	0.9995513	6770	1	5469	0.9998172	1997	1	11678	0.9998287	5286	1	4429	1	2315	1	TRUE	TRUE	FALSE
141	141_NCASD	NCASD	FBDHS	2	165462940	SNDHS327294	T	7178	0.9998607	9511	0.9997897	3908	1	6476	0.9998456	4675	1	3361	1	11773	1	4482	0.9997769	4043	1	2226	1	TRUE	TRUE	FALSE
142	142_NCASD	NCASD	FBDHS	2	165463340	SNDHS327295	T	267	1	1310	1	215	1	506	1	244	1	1248	0.9991987	1094	1	9	1	11	1	10	1	FALSE	FALSE	FALSE
143	143_NCASD	NCASD	FBDHS	2	165465840	SNDHS327296	C	5735	1	7841	0.9997449	4326	1	6316	0.9993667	3665	1	23450	0.9999147	26440	0.9998109	10583	0.9997165	10839	1	7840	0.9998724	TRUE	TRUE	FALSE
144	144_NCASD	NCASD	FBDHS	2	165467540	SNDHS327297	G	510	1	51	1	485	1	544	1	362	1	2225	1	4212	1	11	1	1680	0.9994048	27	1	FALSE	FALSE	FALSE
145	145_NCASD	NCASD	FBDHS	2	165468520	SNDHS327298	A	3372	1	6957	0.9998563	2353	0.999575	3304	0.9987893	1673	0.9982068	88	1	65	1	27	1	59	1	969	1	TRUE	FALSE	FALSE
145	145_NCASD	NCASD	FBDHS	2	165468740	SNDHS327299	A	1568	0.9993622	2861	1	987	0.9989868	1238	1	734	0.9986376	18	1	19	1	3	1	12	1	377	1	TRUE	FALSE	FALSE
146	146_NCASD	NCASD	FBDHS	2	165469720	SNDHS327300	G	811	1	1463	1	871	1	1601	0.9993754	861	0.9988386	867	0.9988466	983	0.9989827	22	1	532	1	907	1	TRUE	FALSE	FALSE
146	146_NCASD	NCASD	FBDHS	2	165470000	SNDHS327301	T	1792	1	4494	1	1745	1	3199	1	1734	1	3510	0.9997151	3866	1	28	1	1930	1	1223	1	TRUE	FALSE	FALSE
147	147_NCASD	NCASD	FBDHS	2	165470560	SNDHS327302	A	1041	1	2942	1	1072	1	1982	0.9994955	1390	0.9992806	5426	0.9996314	5648	0.9998229	722	1	1228	1	1187	1	TRUE	FALSE	FALSE
148	148_NCASD	NCASD	FBDHS	2	165471040	SNDHS327303	T	34	1	176	1	120	1	107	1	159	1	1940	0.9994845	749	1	154	1	113	1	370	1	FALSE	FALSE	FALSE
149	149_NCASD	NCASD	FBDHS	2	165471920	SNDHS327304	C	955	0.9989529	2564	0.9984399	849	0.9976443	1092	0.996337	998	0.998998	9476	0.9990502	11658	0.9987133	16127	0.9978297	4005	0.9962547	6155	0.9983753	TRUE	TRUE	FALSE
150	150_NCASD	NCASD	FBDHS	2	165472240	SNDHS327305	A	339	1	1286	0.9992224	362	1	575	0.9982609	505	0.9980198	2609	1	3594	1	5909	1	775	1	241	1	FALSE	FALSE	FALSE
150	150_NCASD	NCASD	FBDHS	2	165472740	SNDHS327306	T	619	1	2065	1	706	1	1397	1	859	1	3236	0.999382	4068	0.9992625	5733	1	2784	1	1716	1	TRUE	TRUE	FALSE
151	151_NCASD	NCASD	FBDHS	2	165473320	SNDHS327307	A	1208	0.9991722	2625	1	1059	1	2208	1	1345	1	3278	0.9996949	4217	0.9995257	5122	0.9994143	5465	1	3414	1	TRUE	TRUE	FALSE
152	152_NCASD	NCASD	FBDHS	2	165474440	SNDHS327309	A	1296	1	1567	1	1139	0.9982441	2484	0.9995974	1328	1	2934	0.9996592	2669	1	3379	1	1779	0.9994379	1638	1	TRUE	TRUE	FALSE
153	153_NCASD	NCASD	FBDHS	2	165475020	SNDHS327310	A	2185	1	2223	0.9995502	1472	1	3451	0.9997102	1724	0.99942	3793	0.9994727	3849	1	4662	0.9997855	2135	1	2174	0.99954	TRUE	TRUE	FALSE
154	154_NCASD	NCASD	FBDHS	2	165475940	SNDHS327311	T	34	1	30	1	34	1	6	1	20	1	22	1	15	1	5	1	3066	1	2108	1	FALSE	FALSE	FALSE
155	155_NCASD	NCASD	FBDHS	2	165476360	SNDHS327312	A	19798	0.999899	11888	0.9995794	8972	0.9994427	13017	0.9996927	9258	0.999784	19289	0.9999482	27965	0.9991775	14878	0.9996639	12348	0.999919	12447	0.9996786	TRUE	TRUE	FALSE
155	155_NCASD	NCASD	FBDHS	2	165476680	SNDHS327313	G	22046	0.9996825	14002	0.9997857	10621	0.9997175	15517	1	11122	0.9998202	21815	0.9999542	31817	0.9998429	17581	0.9997156	14524	0.9999311	14428	0.9997921	TRUE	TRUE	FALSE
155	155_NCASD	NCASD	FBDHS	2	165476840	SNDHS327314	G	18003	0.9998334	11747	1	8857	1	12657	0.999842	9545	1	18067	0.9999447	27472	1	15594	1	11915	0.9999161	12121	0.9999175	TRUE	TRUE	FALSE
156	156_NCASD	NCASD	FBDHS	2	165478880	SNDHS327315	G	4135	0.9995163	5824	0.9996566	2404	1	4002	1	2969	1	7091	0.999718	10873	1	16434	0.9998783	7000	1	5603	1	TRUE	TRUE	FALSE
157	157_NCASD	NCASD	FBDHS	2	165497320	SNDHS327316	A	4540	0.9997797	6819	0.9998534	2640	0.9992424	3452	0.9994206	4068	0.9997542	4957	1	5930	0.9998314	4604	0.9995656	610	1	1242	1	TRUE	FALSE	FALSE
157	157_NCASD	NCASD	FBDHS	2	165497860	SNDHS327317	G	8240	0.9998786	9560	0.9998954	5560	0.9991007	8990	0.9998888	6852	0.9995622	9518	0.9997899	12998	0.9997692	13140	0.9996195	4786	1	7476	0.9997325	TRUE	TRUE	FALSE
158	158_NCASD	NCASD	FBDHS	2	165498360	SNDHS327318	A	6122	0.9996733	5628	0.9998223	3845	1	7451	0.9998658	3904	1	6943	1	11661	0.9998285	13645	0.9999267	4620	0.9995671	8252	0.9998788	TRUE	TRUE	FALSE
159	159_NCASD	NCASD	FBDHS	2	165499600	SNDHS327319	C	3062	1	3663	1	1842	1	2950	1	2014	1	7566	0.9996035	9076	0.9995593	15709	0.9996817	3359	0.9997023	3301	1	TRUE	TRUE	FALSE
160	160_NCASD	NCASD	FBDHS	2	165500300	SNDHS327320	A	1019	1	1568	1	1115	1	1961	0.9989801	934	1	773	1	1111	1	26	1	226	1	430	1	TRUE	FALSE	FALSE
160	160_NCASD	NCASD	FBDHS	2	165500540	SNDHS327321	C	2702	0.996299	3667	0.9997273	2650	0.9996226	4727	1	2671	0.9985024	1892	0.9994715	2380	1	39	1	590	1	897	1	TRUE	FALSE	FALSE
161	161_NCASD	NCASD	FBDHS	2	165501280	SNDHS327322	T	888	0.9988739	1183	0.9991547	749	1	2074	1	587	1	6759	0.9995561	11870	0.9997473	7154	0.9997204	3412	0.9994138	5682	0.999824	TRUE	TRUE	FALSE
163	163_NCASD	NCASD	FBDHS	2	165513480	SNDHS327324	A	7662	0.9993474	9691	0.9997936	4019	0.9992535	6690	0.9994021	4016	0.999253	7623	0.9997376	8015	0.9996257	2300	0.9995652	6463	0.9993811	5655	0.9998232	TRUE	TRUE	FALSE
49	49_SCN1A	SCN1A	LD	2	165972573	rs67356803	G	27207	0.5612159	22094	0.4678193	12193	0.5160338	17290	0.5220359	9983	0.6067314	482	0.4045643	5309	0.02994914	168	0.5	3048	0.2854331	1750	0.1822857	TRUE	FALSE	TRUE
52	52_SCN1A	SCN1A	LD	2	165981328	rs12993279	A	573	0.1343805	2903	0.0006889425	674	0.1557864	754	0.1114058	1122	0.06327986	3453	0.0005792065	7948	0.0006290891	6700	0	782	0	3323	0.0006018658	TRUE	FALSE	FALSE
53	53_SCN1A	SCN1A	LD	2	165982791	rs13001295	A	401	0.6832918	20	0.45	317	0.8012618	1083	0.5069252	587	0.7614991	997	0.006018054	616	0.9090909	5354	0.0009338812	589	0.9949066	49	0.1020408	FALSE	FALSE	TRUE
53	53_SCN1A	SCN1A	LD	2	165983238	rs13033729	T	950	0.7526316	33	0.4545455	675	0.8281481	2265	0.5214128	1009	0.7185332	2101	0.004759638	1133	0.9576346	5475	0.000913242	1255	0.9928287	29	0.06896552	FALSE	FALSE	TRUE
54	54_SCN1A	SCN1A	LD	2	165988609	rs13006006	A	23836	0.4012418	19335	0.3788467	13174	0.4016244	20270	0.3620622	11299	0.3664926	10775	0.2147564	17287	0.2262394	14000	0.276	6951	0.06905481	3921	0.4562612	TRUE	TRUE	TRUE
55	55_SCN1A	SCN1A	LD	2	165996544	rs552878	T	896	0.2857143	6	0.6666667	383	0.4073107	287	0.8292683	633	0.5513428	7	0.4285714	13	0.5384615	6	0.1666667	4	0	589	1	FALSE	FALSE	TRUE
56	56_SCN1A	SCN1A	LD	2	166000315	rs496571	C	668	0.994012	3728	0.9994635	673	1	1000	1	1158	1	4557	0.9995611	4619	0.8731327	56	1	426	1	1664	0.9975962	TRUE	FALSE	FALSE
56	56_SCN1A	SCN1A	LD	2	166000950	rs523119	C	679	0.9793814	3878	0.9979371	758	0.9986807	1114	0.9991023	1233	1	4566	0.999562	5842	0.8524478	39	0.9487179	435	1	1682	0.9976219	TRUE	FALSE	FALSE
57	57_SCN1A	SCN1A	LD	2	166001881	rs12987787	T	413	0.6731235	875	0.9554286	669	0.6502242	1463	0.6466165	919	0.6757345	522	0.9789272	51	0.9803922	3	1	13	0.4615385	1	1	TRUE	FALSE	FALSE
58	58_SCN1A	SCN1A	LD	2	166004968	rs567652	G	3545	0.8330042	8466	0.8127805	2852	0.8457223	4882	0.9143794	3192	0.7985589	8421	0.8151051	19127	0.6600094	5120	0.9935547	2831	0.8693041	5505	0.9028156	TRUE	TRUE	TRUE
58	58_SCN1A	SCN1A	LD	2	166005215	rs504059	C	1944	0.7978395	4798	0.8086703	1668	0.8609113	2933	0.9140811	1918	0.7914494	4794	0.8028786	10921	0.6678876	3194	0.9946775	1573	0.8595041	3110	0.9115756	TRUE	TRUE	TRUE
59	59_SCN1A	SCN1A	LD	2	166011423	rs545238	A	2768	0.5513006	4962	0.2924224	2420	0.5586777	5277	0.4743225	2455	0.4818737	3917	0.006127138	9296	0.4419105	4489	0.9915349	1594	0.4937265	178	0.5280899	TRUE	FALSE	TRUE
60	60_SCN1A	SCN1A	LD	2	166015395	rs577306	C	2093	0.4968944	2444	0.655892	1244	0.4782958	1683	0.449792	1155	0.5333333	767	0.9556714	149	0.5771812	6302	0.677404	1441	0.1811242	1956	0.5480573	TRUE	FALSE	TRUE
61	61_SCN1A	SCN1A	LD	2	166016789	rs565348	A	1336	0.9992515	7206	1	1329	1	2061	1	1581	1	5071	1	5990	0.9998331	8423	0.9997626	1465	0.9993174	2187	0.9995428	TRUE	TRUE	FALSE
62	62_SCN1A	SCN1A	LD	2	166020319	rs495681	C	2275	0.9767033	7466	0.9989285	1511	0.9702184	3248	0.9060961	2157	0.9967548	3599	0.9997221	2545	0.9992141	32	0.96875	230	1	394	0.9974619	TRUE	FALSE	FALSE
62	62_SCN1A	SCN1A	LD	2	166020327	rs507193	A	2190	0.9799087	7372	0.9989148	1468	0.9686649	3071	0.9137089	2056	0.9970817	3479	0.9997126	2495	0.9995992	32	0.96875	219	1	398	0.9974874	TRUE	FALSE	FALSE
63	63_SCN1A	SCN1A	LD	2	166025380	rs536744	C	16918	0.8339047	19641	0.8046943	14750	0.8172203	21147	0.8308034	13960	0.819341	19097	0.796722	22844	0.9084223	14693	0.9973457	17299	0.9286664	18399	0.9306484	TRUE	TRUE	TRUE
64	64_SCN1A	SCN1A	LD	2	166027122	rs508585	C	337	0.6587537	1659	0.7757685	833	0.5546218	1817	0.4628509	869	0.881473	735	0.02312925	32	0.5625	37	0.4054054	28	0.7857143	15	0.4666667	TRUE	FALSE	TRUE
65	65_SCN1A	SCN1A	LD	2	166029210	rs1834840	G	8842	0.462565	7432	0.4599031	5131	0.3738063	6933	0.3184768	5284	0.4106737	4340	0.01059908	5456	0.3071848	8229	0.4147527	2123	0.4564296	882	0.09183673	TRUE	FALSE	TRUE
65	65_SCN1A	SCN1A	LD	2	166029378	rs1834839	A	12339	0.4673799	10138	0.4701124	6936	0.36188	9817	0.3212794	7246	0.4133315	5783	0.007954349	6868	0.2963017	10698	0.4149374	2627	0.4541302	1004	0.0936255	TRUE	TRUE	TRUE
65	65_SCN1A	SCN1A	LD	2	166029602	rs7595154	G	8519	0.5004108	6834	0.4625402	3882	0.4003091	5975	0.3551464	3995	0.432791	3609	0.01052923	5118	0.9747948	7118	0.4388873	1406	0.4502134	530	0.0754717	TRUE	FALSE	TRUE
65	65_SCN1A	SCN1A	LD	2	166030005	rs2390321	C	8450	0.4597633	7468	0.4694697	5278	0.373058	7183	0.3538911	5261	0.4248242	4176	0.009578544	5225	0.9688038	7671	0.4257594	2036	0.4332024	762	0.1010499	TRUE	FALSE	TRUE
66	66_SCN1A	SCN1A	LD	2	166030165	rs2390322	C	1959	0.2174579	7082	0.3973454	2092	0.2213193	3117	0.3551492	1860	0.1758065	3134	0.004467135	3914	0.184466	6859	0.3504884	1006	0.01590457	2602	0.009223674	TRUE	TRUE	TRUE
66	66_SCN1A	SCN1A	LD	2	166030309	rs1841547	C	2630	0.2045627	8652	0.3837263	2495	0.2344689	3546	0.3482798	2235	0.1807606	3940	0.007106599	4982	0.1898836	8803	0.3405657	1103	0.0199456	3221	0.007451102	TRUE	TRUE	TRUE
66	66_SCN1A	SCN1A	LD	2	166030406	rs11345139	C	1925	0.9994805	6749	0.9997037	1753	1	2462	0.9991877	1625	0.9987692	2837	0.999295	3614	1	7884	0.9997463	708	1	2475	0.999596	TRUE	FALSE	FALSE
66	66_SCN1A	SCN1A	LD	2	166030416	rs7598539	C	1786	0.2099664	6326	0.3910844	1641	0.2407069	2276	0.3299649	1517	0.1727093	2729	0.006595823	3348	0.1666667	7315	0.3935748	675	0.01481481	2363	0.007194245	TRUE	FALSE	TRUE
66	66_SCN1A	SCN1A	LD	2	166030773	rs2114760	C	1415	0.2424028	4943	0.4025895	1426	0.2370266	1852	0.3542117	1303	0.1811205	1921	0.01145237	2422	0.2014864	6576	0.3515815	518	0.01158301	1810	0.02209945	TRUE	FALSE	TRUE
67	67_SCN1A	SCN1A	LD	2	166031726	rs4667861	C	216	0.5324074	897	0.9777035	105	0.7904762	251	0.9561753	246	0.7357724	71	0.971831	869	0.9942463	4	1	41	0.09756098	562	0.9982206	FALSE	FALSE	FALSE
67	67_SCN1A	SCN1A	LD	2	166031929	rs4667862	A	638	0.4404389	1880	0.9728723	245	0.6734694	581	0.9001721	486	0.6748971	133	0.9849624	1955	0.998977	12	0.6666667	112	0.09821429	1401	0.9978587	FALSE	FALSE	FALSE
67	67_SCN1A	SCN1A	LD	2	166032258	rs5006656	C	476	0.3781513	1280	0.9703125	205	0.702439	391	0.8849105	400	0.61	102	0.9901961	1358	1	3	1	68	0.1176471	914	0.9956236	FALSE	FALSE	FALSE
68	68_SCN1A	SCN1A	LD	2	166032727	rs7606573	G	524	0.5209924	934	0.01498929	453	0.5474614	759	0.2187088	606	0.6171617	1165	0.01030043	23	0.3913043	8	0.5	18	0.4444444	667	0.00149925	FALSE	FALSE	FALSE
68	68_SCN1A	SCN1A	LD	2	166032966	rs7606888	G	1030	0.4941748	1572	0.01717557	871	0.5028703	1372	0.2332362	1235	0.5781377	1828	0.003829322	49	0.4285714	15	0.6	29	0.7586207	1132	0.004416961	TRUE	FALSE	FALSE
68	68_SCN1A	SCN1A	LD	2	166033032	rs13398343	A	1165	0.6995708	1860	0.03602151	973	0.7348407	1510	0.4192053	1398	0.8526466	2075	0.9918072	46	0.6956522	18	0.6111111	31	0.8709677	1215	0.01399177	TRUE	FALSE	FALSE
69	69_SCN1A	SCN1A	LD	2	166033433	rs6432858	C	572	0.5	1557	0.5298651	656	0.3567073	689	0.862119	371	0.2102426	14	0.7857143	993	0.9526687	8403	0.603713	221	1	907	0.4421169	FALSE	FALSE	TRUE
69	69_SCN1A	SCN1A	LD	2	166033469	rs11463642	T	515	0.9902913	1506	0.9926959	597	0.9949749	623	0.9951846	369	0.9918699	14	1	965	0.9989637	7806	0.9938509	224	1	868	0.9942396	FALSE	FALSE	FALSE
69	69_SCN1A	SCN1A	LD	2	166033486	rs62179375	C	433	0.9884527	1351	1	505	0.9980198	556	0.9982014	326	0.9969325	12	1	878	1	7156	0.9991615	194	1	771	1	FALSE	FALSE	FALSE
69	69_SCN1A	SCN1A	LD	2	166033763	rs7571204	T	255	0.427451	703	0.6216216	313	0.3290735	237	0.8101266	174	0.1781609	9	0.8888889	424	0.9363208	6268	0.5851946	102	0.9901961	591	0.4043993	FALSE	FALSE	TRUE
69	69_SCN1A	SCN1A	LD	2	166033967	rs17792698	A	241	0.5062241	703	0.56899	244	0.4180328	266	0.8571429	158	0.2278481	11	0.6363636	452	0.9402655	5807	0.6483554	99	0.979798	485	0.5072165	FALSE	FALSE	TRUE
69	69_SCN1A	SCN1A	LD	2	166034101	rs13418651	A	264	0.4659091	779	0.5275995	345	0.2434783	256	0.8320312	186	0.155914	12	0.25	411	0.9221411	6088	0.5073916	108	1	559	0.4078712	FALSE	FALSE	TRUE
71	71_SCN1A	SCN1A	LD	2	166037022	rs4667863	T	1558	0.1103979	3888	0.1566358	1518	0.1152833	1743	0.1113024	1553	0.09401159	1344	0.008928571	4384	0.1024179	11080	0.3572202	3410	0.0008797654	7278	0.1433086	TRUE	TRUE	TRUE
71	71_SCN1A	SCN1A	LD	2	166037124	rs10185007	G	2113	0.230478	5615	0.2589492	2110	0.2175355	2966	0.2090357	2091	0.1898613	2410	0.009543568	5531	0.1923703	9143	0.4326807	6251	0.001759718	9942	0.1472541	TRUE	TRUE	TRUE
71	71_SCN1A	SCN1A	LD	2	166037168	rs10197430	T	4271	0.8812924	8299	0.4988553	3740	0.8601604	5009	0.8870034	3813	0.8245476	4097	0.9809617	8326	0.8278885	12511	0.9986412	9959	0.8367306	14874	0.5510286	TRUE	TRUE	TRUE
71	71_SCN1A	SCN1A	LD	2	166037610	rs66463257	A	3242	0.9996915	6217	1	2895	1	3970	0.9997481	2848	1	2754	1	6042	0.999669	10337	0.9997098	7502	0.9994668	9437	0.9997881	TRUE	TRUE	FALSE
72	72_SCN1A	SCN1A	LD	2	166037720	rs2020318	T	4292	0.2283318	8046	0.354089	4261	0.2605022	5232	0.2291667	4275	0.2273684	4047	0.007907092	7124	0.2539304	9939	0.379012	10612	0.001319261	11623	0.172933	TRUE	TRUE	TRUE
74	74_SCN1A	SCN1A	LD	2	166038371	rs6719077	T	6634	0.05788363	5864	0.04621419	4506	0.06347093	5606	0.04067071	3685	0.07516961	4743	0.03499895	3942	0.1623541	1073	0.02143523	3196	0.09637046	1287	0.03496503	TRUE	TRUE	FALSE
73	73_SCN1A	SCN1A	LD	2	166038527	rs11685081	G	13448	0.6696907	12563	0.5907029	9799	0.6795591	11720	0.6726962	8897	0.6370687	10930	0.6513266	9197	0.7641622	7995	0.595122	5818	0.8179787	3771	0.7242111	TRUE	TRUE	TRUE
73	73_SCN1A	SCN1A	LD	2	166038556	rs6732655	A	13990	0.1113653	13809	0.1520023	10331	0.1057013	12506	0.09763314	9502	0.1189223	12217	0.1375133	10100	0.1411881	9347	0.1358725	6402	0.02171197	4374	0.008459076	TRUE	TRUE	TRUE
73	73_SCN1A	SCN1A	LD	2	166038693	rs6732789	A	13545	0.108601	12719	0.1625128	9256	0.09464131	11192	0.1017691	8345	0.1086878	11706	0.1369383	10179	0.120837	11844	0.1080716	5766	0.01907735	4472	0.004472272	TRUE	TRUE	TRUE
73	73_SCN1A	SCN1A	LD	2	166038716	rs6719462	T	13586	0.1040041	12875	0.159068	9208	0.09133362	11261	0.09999112	8399	0.1060841	11893	0.140671	10359	0.1210542	12430	0.1028962	5642	0.01914215	4549	0.003737085	TRUE	TRUE	TRUE
73	73_SCN1A	SCN1A	LD	2	166038992	rs6761757	C	5542	0.2915915	8312	0.3090712	4115	0.2298906	6014	0.2502494	4527	0.203446	7957	0.2306146	5907	0.1223972	11675	0.1403854	2655	0.05574388	3759	0.009044959	TRUE	TRUE	TRUE
73	73_SCN1A	SCN1A	LD	2	166039063	rs6719899	T	4479	0.2842152	7517	0.3232673	3537	0.2397512	5278	0.2482001	3699	0.2160043	7179	0.2320657	5059	0.1187982	9761	0.1400471	2420	0.05247934	3472	0.006624424	TRUE	TRUE	TRUE
73	73_SCN1A	SCN1A	LD	2	166039215	rs1019724	T	2588	0.2337713	4618	0.2893027	2230	0.1991031	3254	0.2006761	2364	0.1747039	4453	0.2075006	3070	0.1221498	7693	0.132848	1205	0.0473029	2002	0.01498501	TRUE	TRUE	TRUE
73	73_SCN1A	SCN1A	LD	2	166039309	rs10168027	A	3098	0.9212395	6305	0.9968279	3156	0.9439163	4402	0.9175375	3192	0.9229323	6097	0.9253731	3992	0.8051102	9134	0.6611561	1926	0.9979232	2815	0.9882771	TRUE	TRUE	FALSE
75	75_SCN1A	SCN1A	LD	2	166039633	rs2126152	T	455	0	124	0	618	0	1414	0	932	0	950	0	8	0	4	0	15	0	7	0	FALSE	FALSE	FALSE
75	75_SCN1A	SCN1A	LD	2	166039668	rs490317	C	439	1	129	1	587	1	1443	1	880	1	924	1	5	1	2	1	10	1	4	1	FALSE	FALSE	FALSE
75	75_SCN1A	SCN1A	LD	2	166039777	rs6432859	T	319	0	98	0	403	0	1274	0	650	0	794	0	4	0	2	0	2	0	4	0	FALSE	FALSE	FALSE
75	75_SCN1A	SCN1A	LD	2	166039852	rs1019722	G	506	0	133	0	590	0.001694915	1991	0	949	0.001053741	1132	0.001766784	8	0	3	0	12	0	3	0	FALSE	FALSE	FALSE
75	75_SCN1A	SCN1A	LD	2	166040120	rs1962843	A	1347	0.01262064	337	0	1467	0.00408998	3951	0.000506201	2141	0.004203643	2336	0.001284247	15	0	3	1	32	0.0625	13	0	FALSE	FALSE	FALSE
75	75_SCN1A	SCN1A	LD	2	166040170	rs1962842	G	1337	0.07329843	284	0.003521127	1361	0.02057311	3658	0.004647348	2006	0.01246261	2161	0	11	0	8	0	28	0	11	0	FALSE	FALSE	FALSE
76	76_SCN1A	SCN1A	LD	2	166040707	rs1531380	T	152	1	13	1	152	1	428	1	126	1	9	1	491	1	5	1	10	1	665	1	FALSE	FALSE	FALSE
76	76_SCN1A	SCN1A	LD	2	166040716	rs1531379	A	150	1	13	1	162	1	453	1	129	1	10	1	516	1	6	1	13	1	670	1	FALSE	FALSE	FALSE
76	76_SCN1A	SCN1A	LD	2	166040738	rs1531378	A	143	1	9	1	149	1	421	1	113	1	11	1	461	1	5	1	10	1	622	1	FALSE	FALSE	FALSE
76	76_SCN1A	SCN1A	LD	2	166041354	rs6432860	A	543	0.5064457	45	0.5111111	759	0.4953887	2252	0.4786856	640	0.3578125	45	0.5555556	1541	0.6482803	18	0.3888889	23	0.6521739	1857	0.6628971	FALSE	FALSE	TRUE
77	77_SCN1A	SCN1A	LD	2	166041507	rs10198801	G	140	0.007142857	10	0	153	0.006535948	562	0	140	0	3	0	267	0	2	0	4	0	316	0	FALSE	FALSE	FALSE
77	77_SCN1A	SCN1A	LD	2	166041834	rs10198937	C	591	0.02199662	57	0	650	0.009230769	2035	0	624	0	21	0	1147	0	10	0	15	0	1000	0	FALSE	FALSE	FALSE
78	78_SCN1A	SCN1A	LD	2	166042592	rs10167228	T	436	0.4541284	2783	0.5806683	603	0.5439469	787	0.6797967	767	0.4615385	843	0.6215896	5245	0.407245	2796	0.9806867	526	0.8250951	650	0.4353846	TRUE	FALSE	TRUE
78	78_SCN1A	SCN1A	LD	2	166043368	rs7574618	G	1090	0.5055046	4301	0.5856777	1130	0.5044248	1588	0.6914358	1377	0.4081336	1455	0.6151203	9271	0.3969367	3664	0.9803493	871	0.7864524	1018	0.3713163	TRUE	FALSE	TRUE
79	79_SCN1A	SCN1A	LD	2	166044096	rs6753355	A	2471	0.1950627	2262	0.007515473	1807	0.1732153	4515	0.2566999	1955	0.1769821	1879	0.3943587	1378	0.0007256894	15	0.06666667	36	0.1388889	20	0.15	TRUE	FALSE	FALSE
79	79_SCN1A	SCN1A	LD	2	166044540	rs62179377	T	1909	1	1811	1	1413	0.9992923	3671	1	1634	1	1642	1	1123	1	9	1	35	1	22	1	TRUE	FALSE	FALSE
79	79_SCN1A	SCN1A	LD	2	166044554	rs1549588	G	1869	0.1979668	1724	0.009280742	1387	0.1997116	3465	0.2582973	1559	0.2091084	1567	0.4358647	1031	0.0009699321	9	0	29	0.2068966	17	0.2352941	TRUE	FALSE	FALSE
80	80_SCN1A	SCN1A	LD	2	166045387	rs67636132	A	2793	0.999642	1539	1	2710	0.999631	4856	0.9995881	2481	1	1628	0.9987715	5215	1	13354	0.9989516	2705	1	951	1	TRUE	FALSE	FALSE
80	80_SCN1A	SCN1A	LD	2	166045593	rs992894	A	1715	0.02740525	903	0.005537099	1543	0.022035	3076	0.005851756	1589	0.03524229	867	0	2993	0	10605	0	1530	0	638	0	TRUE	FALSE	FALSE
81	81_SCN1A	SCN1A	LD	2	166046935	rs7580482	T	4437	0.6301555	7555	0.54454	2849	0.6721657	4329	0.6084546	2934	0.6714383	6041	0.8164211	8931	0.5058784	8628	0.3415624	1281	0.9102264	1974	0.2619048	TRUE	TRUE	TRUE
81	81_SCN1A	SCN1A	LD	2	166047246	rs13421166	C	9087	0.2673049	12451	0.299494	5921	0.2872826	8003	0.2761464	5974	0.2455641	10719	0.1045807	15631	0.4081633	13663	0.003073995	4073	0.1726	6328	0.1219975	TRUE	TRUE	TRUE
81	81_SCN1A	SCN1A	LD	2	166047552	rs11690962	G	6637	0.7855959	9189	0.8124932	4493	0.8045849	6347	0.7384591	4369	0.666743	8129	0.7203838	11514	0.9326038	9716	0.6776451	3294	0.486946	4690	0.7897655	TRUE	TRUE	TRUE
82	82_SCN1A	SCN1A	LD	2	166047836	rs1461193	G	3256	0.2297297	4555	0.005927552	2764	0.2514472	3732	0.2709003	3107	0.1734792	3955	0.003286979	5419	0.4024728	5184	0.00154321	2073	0.004823927	3203	0.2147986	TRUE	TRUE	FALSE
83	83_SCN1A	SCN1A	LD	2	166048493	rs6432862	A	820	0.6207317	88	0.6363636	986	0.5679513	1192	0.579698	1512	0.8207672	519	0.02504817	4971	0.7596057	5763	0.5174388	883	0.9116648	1921	0.5736596	FALSE	FALSE	TRUE
83	83_SCN1A	SCN1A	LD	2	166048970	rs994399	G	957	0.6008359	96	0.84375	955	0.573822	1131	0.6065429	1415	0.8240283	613	0.03099511	5805	0.7514212	6512	0.5076781	1087	0.9107636	2455	0.6187373	FALSE	FALSE	TRUE
84	84_SCN1A	SCN1A	LD	2	166050272	rs4667865	C	19	0	62	0	103	0	93	0	59	0	339	0	210	0	835	0.005988024	217	0	11	0	FALSE	FALSE	FALSE
84	84_SCN1A	SCN1A	LD	2	166050545	rs11313339	A	142	1	199	1	391	0.9948849	556	0.9982014	473	1	1053	0.997151	1123	1	3257	0.9993859	886	0.9988713	28	1	FALSE	FALSE	FALSE
84	84_SCN1A	SCN1A	LD	2	166050834	rs1427652	A	90	0	154	0	258	0	383	0	213	0	816	0	802	0	1636	0	543	0	16	0	FALSE	FALSE	FALSE
85	85_SCN1A	SCN1A	LD	2	166051461	rs6735104	C	33	1	1193	0.9991618	71	1	112	1	201	1	1070	0.9990654	587	0.9982964	4	1	258	1	140	0.9928571	FALSE	FALSE	FALSE
86	86_SCN1A	SCN1A	LD	2	166052559	rs28663047	T	1034	0.7601547	2117	0.9929145	1041	0.7098943	1715	0.7521866	1354	0.7422452	936	0.9935897	2984	0.7057641	3662	0.9986346	559	1	53	0.8679245	TRUE	FALSE	FALSE
86	86_SCN1A	SCN1A	LD	2	166053049	rs3812719	C	5825	0.3548498	10718	0.2743049	4140	0.3990338	6926	0.366734	4659	0.4915218	1886	0.03022269	6889	0.403687	6821	0.9941358	3847	0.1016376	4154	0.1887338	TRUE	TRUE	TRUE
250	250_SCN1A	SCN1A	LD	2	166053241	rs2195144	T	3351	0.276037	6950	0.254964	2346	0.3448423	3812	0.3323715	2497	0.4164998	1005	0.0358209	3531	0.5499858	3237	0.9876429	2371	0.07423028	2869	0.1655629	TRUE	TRUE	TRUE
250	250_SCN1A	SCN1A	LD	2	166053322	rs2859817	A	4382	0.3352351	8551	0.2743539	3172	0.372005	4878	0.3407134	3357	0.456062	1079	0.04263207	4167	0.6186705	4011	0.9902767	2921	0.07086614	3631	0.1820435	TRUE	TRUE	TRUE
87	87_SCN1A	SCN1A	LD	2	166054195	rs7602046	A	2441	0.4690701	3403	0.5856597	1589	0.4449339	2760	0.5141304	1469	0.4894486	2027	0.4257523	5751	0.2733438	14378	0.09792739	2726	0.6419663	4188	0.7996657	TRUE	TRUE	TRUE
87	87_SCN1A	SCN1A	LD	2	166054202	rs7589765	T	2650	0.3686792	3588	0.3595318	1674	0.3458781	2944	0.4127038	1550	0.4483871	2158	0.4230769	6097	0.1118583	15662	0.09373005	2930	0.2228669	4442	0.6906799	TRUE	TRUE	TRUE
88	88_SCN1A	SCN1A	LD	2	166055076	rs1541783	T	167	1	259	0.996139	253	1	337	1	166	1	1017	1	972	1	4261	0.9992959	221	1	287	1	FALSE	FALSE	FALSE
88	88_SCN1A	SCN1A	LD	2	166055432	rs922227	G	197	0	486	0	390	0.005128205	705	0.00141844	248	0	1774	0.0005636979	1266	0	3811	0.001311992	532	0	448	0	FALSE	FALSE	FALSE
89	89_SCN1A	SCN1A	LD	2	166057264	rs7423423	G	841	0.01189061	79	0	823	0.0255164	1537	0	942	0.001061571	1391	0	1193	0	20	0	102	0	377	0	FALSE	FALSE	FALSE
90	90_SCN1A	SCN1A	LD	2	166058825	rs10930201	C	873	0.4180985	1792	0.9877232	814	0.4250614	868	0.2407834	781	0.5774648	28	0.3928571	782	0.008951407	3357	0.001489425	124	0.02419355	1221	0.1990172	TRUE	FALSE	FALSE
90	90_SCN1A	SCN1A	LD	2	166059387	rs10188577	T	1453	1	3473	0.9997121	1292	1	1907	0.9994756	1173	1	53	1	1451	1	4442	0.9993246	493	1	2244	1	TRUE	FALSE	FALSE
90	90_SCN1A	SCN1A	LD	2	166059533	rs4667867	A	1416	0.4498588	3407	0.987966	1409	0.4875798	1812	0.2339956	1244	0.5771704	60	0.5333333	1394	0.0143472	3976	0.001509054	458	0.04366812	2128	0.1846805	TRUE	FALSE	FALSE
91	91_SCN1A	SCN1A	LD	2	166060307	rs62179390	C	14834	0.9165431	16855	0.9217443	7475	0.9142475	9882	0.8960737	6425	0.9021012	5586	0.7160759	4271	0.9978928	11036	0.9974628	5629	0.9985788	3663	0.996178	TRUE	TRUE	TRUE
91	91_SCN1A	SCN1A	LD	2	166060309	rs1461202	A	14686	0.6935176	16740	0.6669654	7390	0.664276	9813	0.7016203	6354	0.6507712	5522	0.4061934	4236	0.5285647	10947	0.9967114	5544	0.989899	3596	0.2461068	TRUE	TRUE	TRUE
91	91_SCN1A	SCN1A	LD	2	166060898	rs4667503	A	7692	0.4843994	10102	0.295882	4116	0.4686589	5782	0.4782082	3554	0.4189645	3120	0.3894231	2246	0.5307213	5243	0.6889186	3493	0.636702	2212	0.255425	TRUE	TRUE	TRUE
92	92_SCN1A	SCN1A	LD	2	166064399	rs557222	G	537	0	2241	0.0004462294	635	0	506	0	1096	0	897	0	3912	0	713	0	585	0	473	0	TRUE	FALSE	FALSE
93	93_SCN1A	SCN1A	LD	2	166068772	rs9287864	A	1944	0.7350823	5838	0.5873587	1370	0.6824818	2826	0.8669498	1250	0.7424	98	0.7653061	3028	0.8896962	3338	0.9985021	1731	0.6302715	720	0.06666667	TRUE	FALSE	TRUE
95	95_SCN1A	SCN1A	LD	2	166085157	rs13393239	T	17755	0.9997184	17487	0.9998856	11631	0.999914	18357	0.9998366	10885	0.9998163	43029	0.9996746	46323	0.9998273	32819	0.9998172	30808	0.9998702	29974	0.9998332	TRUE	TRUE	FALSE
96	96_SCN1A	SCN1A	LD	2	166086767	rs11890028	T	13845	0.6901408	12100	0.6257851	8866	0.6855403	10996	0.6810658	7608	0.6836225	15508	0.8506577	26259	0.8581058	13529	0.8573435	8440	0.6932464	8450	0.7794083	TRUE	TRUE	TRUE
96	96_SCN1A	SCN1A	LD	2	166087494	rs11885663	C	20586	0.6606917	20247	0.6165852	14484	0.6586578	19453	0.6711047	11458	0.667394	24748	0.844149	35238	0.8431239	14027	0.8455835	14677	0.6621925	13074	0.7754322	TRUE	TRUE	TRUE
97	97_SCN1A	SCN1A	LD	2	166088707	rs11887412	G	50	0.9	39	1	14	0.6428571	1	1	19	1	443	1	208	1	659	1	24	1	58	0.03448276	FALSE	FALSE	FALSE
98	98_SCN1A	SCN1A	LD	2	166094000	rs580041	C	7531	0.8986854	8588	0.9945272	3717	0.8870056	5998	0.8736245	3558	0.9179314	146	0.9863014	3891	0.999229	33	0.8484848	1409	0.9985806	65	0.9384615	TRUE	FALSE	FALSE
99	99_SCN1A	SCN1A	LD	2	166098486	rs489811	T	8241	0.7728431	9914	0.6696591	4165	0.7589436	6169	0.8419517	3617	0.7876693	312	0.7820513	10090	0.2122894	13726	0.8701734	11268	0.8029819	12789	0.9505825	TRUE	FALSE	TRUE
99	99_SCN1A	SCN1A	LD	2	166099080	rs573627	T	9074	0.7748512	9317	0.6631963	4067	0.7809196	5534	0.8440549	3505	0.7968616	295	0.8	9490	0.2140148	12546	0.8688028	9682	0.8167734	12045	0.9515982	TRUE	FALSE	TRUE
100	100_SCN1A	SCN1A	LD	2	166104152	rs567096	A	3051	0.8423468	3599	0.9947208	1702	0.8542891	2218	0.9012624	1256	0.7595541	4173	0.8066139	6378	0.8949514	5001	0.4465107	2214	0.9981933	3603	0.9944491	TRUE	TRUE	FALSE
101	101_SCN1A	SCN1A	LD	2	166108291	rs6731168	A	2473	0.7537404	3932	0.8685148	1514	0.7569353	1876	0.8336887	1284	0.8224299	56	0.875	69	0.2318841	3927	0.003055768	109	0.9266055	23	0.08695652	TRUE	FALSE	TRUE
101	101_SCN1A	SCN1A	LD	2	166108948	rs6731869	A	3351	0.731125	5237	0.8739736	2137	0.7430978	2490	0.8365462	1653	0.8251664	43	0.9302326	123	0.2601626	6305	0.0006344171	175	0.96	74	0.04054054	TRUE	FALSE	TRUE
102	102_SCN1A	SCN1A	LD	2	166111709	rs10930205	C	5592	0.8871602	7020	0.977208	2905	0.8987952	5620	0.9113879	2923	0.8255217	1624	0.0726601	4528	0.7071555	7635	0.5908317	3416	0.7959602	2866	0.3112352	TRUE	TRUE	FALSE
102	102_SCN1A	SCN1A	LD	2	166112151	rs13388135	G	5929	0.8692866	8676	0.9770632	3423	0.8962898	7064	0.9061438	3319	0.808376	1685	0.07655786	4437	0.6842461	7796	0.5831195	3660	0.7967213	2621	0.3124762	TRUE	TRUE	FALSE
103	103_SCN1A	SCN1A	LD	2	166113285	rs10185842	T	3197	0.7535189	7774	0.6804734	1870	0.7828877	2220	0.7369369	1709	0.8665886	3872	0.7815083	4380	0.7988584	10201	0.9996079	2194	0.9156791	2905	0.7008606	TRUE	TRUE	TRUE
105	105_SCN1A	SCN1A	LD	2	166122240	rs7587026	C	856	0.5198598	608	0.02796053	645	0.5286822	872	0.8233945	768	0.7473958	14	0.2857143	27	0	7	0.2857143	4	0.5	662	0	TRUE	FALSE	FALSE
106	106_SCN1A	SCN1A	LD	2	166124756	rs61390066	A	16964	0.6166588	12044	0.6467121	9599	0.6196479	12735	0.5798979	9393	0.5658469	2121	0.9462518	1161	0.9086994	4532	0.9931598	1623	0.7831177	1498	0.5307076	TRUE	TRUE	TRUE
108	108_SCN1A	SCN1A	LD	2	166133537	rs1960242	G	1431	0.8672257	2111	0.591189	1349	0.915493	1376	0.8364826	1214	0.9028007	5958	0.8727761	9211	0.8530018	2398	0.9983319	2880	0.8163194	2711	0.9251199	TRUE	TRUE	TRUE
109	109_SCN1A	SCN1A	LD	2	166134926	rs16851603	C	2951	0.7753304	3741	0.9681903	1663	0.7943476	1989	0.7823027	2151	0.8005579	35	0.8571429	1391	0.9971244	25	0.88	648	0.9953704	898	0.9988864	TRUE	FALSE	FALSE
109	109_SCN1A	SCN1A	LD	2	166135289	rs3919196	C	1787	0.769446	2649	0.9682899	1187	0.7978096	1492	0.8009383	1545	0.7902913	44	0.7045455	983	0.9979654	12	0.75	517	0.9941973	742	0.9973046	TRUE	FALSE	FALSE
110	110_SCN1A	SCN1A	LD	2	166136524	rs11896706	T	5797	0.8633776	4656	0.9995704	3133	0.8949888	5704	0.7629734	2657	0.9311253	71	0.915493	98	0.9387755	3990	0.9989975	1061	0.9971725	1184	0.9991554	TRUE	FALSE	FALSE
111	111_SCN1A	SCN1A	LD	2	166139181	rs13384709	A	28415	0.7080415	12228	0.4007197	11807	0.747692	16770	0.7750745	9268	0.7538843	16072	0.7242409	22791	0.8420429	10169	0.4505851	12607	0.7727453	6118	0.6176855	TRUE	TRUE	TRUE
112	112_SCN1A	SCN1A	LD	2	166142257	rs6432877	C	5982	0.6651622	10989	0.5396305	3224	0.6978908	5853	0.7066462	2730	0.8080586	161	0.5590062	5527	0.3680116	4509	0.9966733	102	0.7058824	1722	0.9883856	TRUE	FALSE	TRUE
113	113_SCN1A	SCN1A	LD	2	166143321	rs13424755	C	10631	0.832377	11450	0.4248035	6322	0.7948434	8885	0.8386044	5132	0.7494154	7768	0.853759	8502	0.8625029	6131	0.9985321	5519	0.9936583	3220	0.9959627	TRUE	TRUE	TRUE
114	114_SCN1A	SCN1A	LD	2	166144333	rs2212656	C	4722	0.6711139	2763	0.810713	2403	0.6537661	4337	0.8000922	3719	0.7233127	1955	0.9938619	6407	0.8036523	7131	0.9998598	2108	0.4516129	121	0.9421488	TRUE	FALSE	TRUE
115	115_SCN1A	SCN1A	LD	2	166152263	rs6432879	C	1501	1	5941	0.9998317	1229	0.9983727	1689	1	1374	1	3435	1	1517	1	8823	0.99932	1034	0.9980658	3625	1	TRUE	TRUE	FALSE
291	291_SZ108	SZ108	GWAS	2	192983613	rs59979824	T	2047	1	1204	0.9991694	1785	1	1293	1	1084	1	8235	0.9997571	9322	0.9998927	10524	1	4636	1	6967	0.9998565	TRUE	TRUE	FALSE
292	292_SZ108	SZ108	GWAS	2	193119894	rs17662626	A	462	1	3003	1	362	1	337	1	394	1	641	1	2081	0.9995195	35	1	399	1	381	1	FALSE	FALSE	FALSE
294	294_SZ108	SZ108	GWAS	2	199299528	rs6704641	A	9616	0.999896	12292	0.9999186	4613	0.9997832	5557	0.99982	4849	0.9993813	12733	0.9999215	15648	0.9998083	7582	0.9997362	3648	1	4426	0.9997741	TRUE	TRUE	FALSE
298	298_SZ108	SZ108	GWAS	2	232878398	rs778371	G	12446	0.9996786	9166	0.9995636	4374	0.9997714	9033	0.9996679	4620	0.9995671	5093	1	1644	1	67	1	1044	0.9990421	1356	1	TRUE	FALSE	FALSE
299	299_SZ108	SZ108	GWAS	2	235886698	rs13025591	A	4647	0.9995696	1855	1	2784	1	5973	0.9996652	3789	0.9997361	8907	0.9997755	9758	0.9995901	68	1	3419	1	2691	1	TRUE	FALSE	FALSE
35	35_Epilepsy	Epilepsy	GWAS	2	57706920	rs13026414	C	1790	0.5977654	6230	0.4784912	1793	0.5962075	4288	0.7434701	1942	0.576725	4402	0.009768287	5724	0.9933613	9328	0.9992496	722	0.05817175	1661	0.0499699	TRUE	FALSE	TRUE
37	37_Epilepsy	Epilepsy	GWAS	2	57867738	rs2717068	A	1335	0	6340	0	1087	0	1116	0	1922	0.0005202914	43	0	71	0	9	0	21	0	7	0	TRUE	FALSE	FALSE
403	403_SZ108	SZ108	GWAS	20	49514498	rs7267348	G	25468	0.9998429	15011	0.9996669	11602	0.9999138	16264	0.9997541	10515	0.9999049	4584	0.9993455	6890	0.9998549	182	0.9945055	2071	1	1900	0.9994737	TRUE	FALSE	FALSE
234	234_NCASD	NCASD	FBDHS	21	40648044	SNDHS369530	A	2535	1	3794	0.9994729	1460	0.9986301	1902	0.9994742	977	1	2234	0.9995524	3645	0.999177	8650	0.9996532	3900	0.9997436	2566	0.9992206	TRUE	TRUE	FALSE
235	235_NCASD	NCASD	FBDHS	21	40652544	SNDHS369531	C	356	1	1070	0.9981308	267	1	384	1	284	1	9	1	2798	1	8	1	517	1	20	1	FALSE	FALSE	FALSE
236	236_NCASD	NCASD	FBDHS	21	40654484	SNDHS369532	G	13878	0.9999279	11542	0.9993935	7526	0.9998671	13836	0.9999277	6853	0.9998541	14035	0.9998575	15013	0.9997336	9168	1	6593	0.9998483	11357	0.9998239	TRUE	TRUE	FALSE
236	236_NCASD	NCASD	FBDHS	21	40654724	SNDHS369533	A	13604	0.9999265	11437	0.9997377	7713	0.9998703	13747	0.9998545	7193	1	13903	0.9998561	14427	0.9998614	8444	0.9996447	6628	0.9995474	11306	0.9998231	TRUE	TRUE	FALSE
237	237_NCASD	NCASD	FBDHS	21	40656464	SNDHS369534	C	15434	0.9994169	12529	0.9996807	7263	0.9997246	10221	0.999413	6839	0.9992689	8699	0.9997701	9014	0.9995562	8452	0.9998817	8761	0.999201	7950	0.9996226	TRUE	TRUE	FALSE
237	237_NCASD	NCASD	FBDHS	21	40656864	SNDHS369535	T	14239	0.9997893	10392	0.9998075	6248	1	7851	0.9998726	5907	1	7388	0.9994586	8008	1	9349	0.9997861	7361	0.9998641	6900	1	TRUE	TRUE	FALSE
238	238_NCASD	NCASD	FBDHS	21	40657444	SNDHS369536	A	2246	0.9995548	1919	1	1456	1	1817	1	1436	1	2390	1	361	1	15	1	15	1	17	1	TRUE	FALSE	FALSE
238	238_NCASD	NCASD	FBDHS	21	40657624	SNDHS369537	G	2298	1	1877	1	1599	1	1994	1	1531	1	2518	1	341	1	12	1	19	1	16	1	TRUE	FALSE	FALSE
238	238_NCASD	NCASD	FBDHS	21	40657944	SNDHS369538	A	1171	1	1000	1	886	0.9988713	1080	1	959	1	1335	1	154	1	11	1	9	1	3	1	TRUE	FALSE	FALSE
310	310_SZ108	SZ108	GWAS	3	136569562	rs7432375	A	93	1	5	1	92	1	33	1	124	1	1158	0.9991364	4	1	2	1	4	1	6	1	FALSE	FALSE	FALSE
116	116_Epilepsy	Epilepsy	GWAS	3	168143620	rs111577701	C	1227	0.995925	267	1	768	0.9986979	2781	1	775	1	8674	0.9997694	17754	0.9998873	3535	0.9997171	6627	0.9993964	3267	0.9990817	FALSE	TRUE	FALSE
301	301_SZ108	SZ108	GWAS	3	17817873	rs4330281	C	48203	0.9998133	12945	0.9997683	20467	0.9996091	26644	0.9996997	17891	1	6000	1	11580	0.9972366	7412	0.9997302	4877	1	1954	0.9994882	TRUE	TRUE	FALSE
311	311_SZ108	SZ108	GWAS	3	180833425	rs1879248	A	1563	0.9897633	5738	0.9966887	864	0.9965278	1083	0.9907664	795	0.9949686	1725	0.9982609	2572	0.9953344	3682	0.9959261	1897	0.9968371	3364	0.9967301	TRUE	TRUE	FALSE
312	312_SZ108	SZ108	GWAS	3	181449796	rs9841616	A	12168	0.9998356	7260	0.9997245	4978	0.9993973	6602	0.9993941	6121	0.9998366	1634	1	128	1	63	1	1747	1	221	1	TRUE	FALSE	FALSE
28	28_Epilepsy	Epilepsy	GWAS	3	21677754	rs1490157	C	772	0.3005181	3759	0.2875765	1029	0.3391642	1068	0.5720974	928	0.3534483	4995	0.3449449	7080	0.3148305	12209	0.2365468	10079	0.09038595	5560	0.3404676	TRUE	TRUE	TRUE
300	300_SZ108	SZ108	GWAS	3	2506101	rs17194490	T	502	1	2193	1	460	1	1089	0.9990817	433	1	6715	0.9998511	5548	1	33	1	702	1	1677	1	FALSE	FALSE	FALSE
302	302_SZ108	SZ108	GWAS	3	36817091	rs75968099	A	10225	0.9998044	8344	0.9997603	2716	0.9992636	4513	1	2843	1	2700	1	3856	1	4575	0.9997814	2625	1	520	1	TRUE	FALSE	FALSE
303	303_SZ108	SZ108	GWAS	3	36821488	rs4624519	T	16956	0.999882	12284	0.9997558	5679	1	11037	0.9996376	5027	0.9998011	6138	0.9998371	14599	0.999589	171	1	3148	0.9996823	4138	1	TRUE	FALSE	FALSE
304	304_SZ108	SZ108	GWAS	3	36822997	rs6550435	T	26178	0.9998472	16128	0.999752	13966	0.9995704	17333	0.9999423	10698	1	7848	1	3075	1	5985	0.9998329	5254	1	2989	0.9996654	TRUE	TRUE	FALSE
305	305_SZ108	SZ108	GWAS	3	52804385	rs4687552	G	26180	0.9999236	17355	0.9997119	10039	0.9998008	15065	0.9999336	8823	1	6824	0.9893025	7653	0.9997387	194	1	4355	1	2552	1	TRUE	FALSE	FALSE
306	306_SZ108	SZ108	GWAS	3	52811088	rs2535627	G	1025	0.9990244	27	1	1183	1	1124	1	1239	1	988	1	18	1	7	1	1045	1	3	1	FALSE	FALSE	FALSE
307	307_SZ108	SZ108	GWAS	3	52821212	rs2239547	A	7902	0.9993672	3777	0.9997352	1332	1	1594	0.9993726	1063	1	341	1	866	1	33	1	35	1	84	1	TRUE	FALSE	FALSE
308	308_SZ108	SZ108	GWAS	3	62079094	rs11130874	C	5498	0.9998181	8663	0.9996537	2836	0.9992948	4081	0.999755	3138	1	15286	0.9998692	20456	0.9999022	5675	1	3951	0.9997469	8816	0.9998866	TRUE	TRUE	FALSE
314	314_SZ108	SZ108	GWAS	4	102225732	rs35518360	A	355	1	3580	0.9994413	558	1	722	1	402	1	23	1	23	1	3	1	94	1	516	1	FALSE	FALSE	FALSE
46	46_Epilepsy	Epilepsy	GWAS	4	149804060	rs10030601	T	3644	0.7187157	6667	0.9850007	3646	0.7342293	6522	0.7680159	3243	0.6179463	10241	0.6084367	16212	0.4872934	7481	0.9934501	6703	0.9574817	2334	0.6512425	TRUE	TRUE	FALSE
315	315_SZ108	SZ108	GWAS	4	169705400	rs10520163	G	576	1	1072	1	433	0.9976905	190	1	371	1	12	1	2954	0.9996615	6	1	197	1	14	1	FALSE	FALSE	FALSE
117	117_Epilepsy	Epilepsy	GWAS	4	175087067	rs72698613	G	12388	0.9999193	18529	0.9997841	5469	1	9179	0.9998911	5617	1	12276	0.9999185	13560	0.9999263	15719	0.9998728	10687	1	12047	0.999917	TRUE	TRUE	FALSE
316	316_SZ108	SZ108	GWAS	4	175940149	rs1106568	A	832	1	70	1	875	1	1089	0.9990817	1385	1	12	1	206	1	10365	0.9997106	15	1	323	1	FALSE	FALSE	FALSE
313	313_SZ108	SZ108	GWAS	4	23421979	rs215411	T	962	1	3508	0.9997149	850	1	1137	1	1114	0.9991023	7101	0.9998592	7647	0.9996077	5980	1	3261	1	2090	1	TRUE	TRUE	FALSE
33	33_Epilepsy	Epilepsy	GWAS	4	46238270	rs535066	G	319	0.9122257	2738	0.9989043	336	0.8958333	438	0.9977169	627	0.8708134	22	0.9545455	586	0.9709898	4	0.75	85	1	430	0.009302326	FALSE	FALSE	FALSE
38	38_Epilepsy	Epilepsy	GWAS	4	61587491	rs2172802	A	3273	0.6162542	5371	0.5345373	2686	0.6600894	3812	0.5527282	2675	0.6403738	1485	0.9212121	2455	0.912831	3401	0.9900029	1161	0.5133506	990	0.9565657	TRUE	FALSE	TRUE
43	43_Epilepsy	Epilepsy	GWAS	5	114932773	rs55670112	A	495	0.6606061	801	0.1198502	795	0.6327044	1157	0.9057908	762	0.9133858	8	0.625	32	0	9	0.2222222	8	0.875	10	0.1	TRUE	FALSE	TRUE
164	164_NCASD	NCASD	FBDHS	5	14016701	SNDHS467541	G	9625	0.9998961	10028	1	5806	1	7202	0.9993057	5356	0.9998133	8533	0.9996484	10222	0.999413	13253	0.9999245	8790	0.9998862	6121	0.9998366	TRUE	TRUE	FALSE
164	164_NCASD	NCASD	FBDHS	5	14016921	SNDHS467542	C	9686	0.999587	10177	0.9998035	6037	1	7013	1	5583	0.9998209	8616	1	10314	0.9997091	14025	0.9996435	8774	0.999886	5917	0.999831	TRUE	TRUE	FALSE
166	166_NCASD	NCASD	FBDHS	5	14020181	SNDHS467544	C	2475	1	7814	0.999872	1341	1	2316	1	1927	0.9994811	7840	0.9998724	8427	0.9998813	10069	1	7489	0.9997329	4403	1	TRUE	TRUE	FALSE
167	167_NCASD	NCASD	FBDHS	5	14023401	SNDHS467545	A	15626	0.999872	7970	0.9997491	6001	1	11464	0.9998255	6466	0.999536	20245	0.9998024	18751	0.9999467	17297	0.9999422	9918	0.9997983	13982	0.9999285	TRUE	TRUE	FALSE
167	167_NCASD	NCASD	FBDHS	5	14023601	SNDHS467546	C	14651	0.9993857	7822	0.9996165	6057	1	10861	0.9996317	6540	0.9995413	19046	0.999685	17875	0.9998322	16694	0.9999401	9522	0.999895	13486	0.9995551	TRUE	TRUE	FALSE
168	168_NCASD	NCASD	FBDHS	5	14025841	SNDHS467547	T	11316	1	8892	0.9996626	3881	0.9997423	7339	0.9995912	4341	0.9997696	2958	0.9993239	3068	1	5258	1	3676	0.999728	4519	0.9991148	TRUE	TRUE	FALSE
170	170_NCASD	NCASD	FBDHS	5	14030461	SNDHS467549	C	8442	0.9998815	11893	1	5915	0.9996619	6947	0.9998561	5910	1	14364	1	14386	1	10242	0.9998047	7282	0.9998627	9852	0.999797	TRUE	TRUE	FALSE
172	172_NCASD	NCASD	FBDHS	5	14035261	SNDHS467551	G	28099	0.9999288	17361	0.9995968	10556	0.9999053	15201	0.9997369	7844	1	4537	1	12013	0.9998335	7316	1	13113	0.9997712	13555	0.9997049	TRUE	TRUE	FALSE
173	173_NCASD	NCASD	FBDHS	5	14036141	SNDHS467552	C	3664	1	7116	0.9997189	2115	1	3992	1	2339	0.9995725	104	1	4826	1	6188	1	1576	1	2506	1	TRUE	FALSE	FALSE
173	173_NCASD	NCASD	FBDHS	5	14036341	SNDHS467553	G	2720	0.9996324	4846	1	1528	1	2581	0.9996126	1616	1	61	1	3597	0.999722	5354	1	1171	0.999146	1847	1	TRUE	FALSE	FALSE
174	174_NCASD	NCASD	FBDHS	5	14037081	SNDHS467554	T	5964	0.9998323	8819	0.9993197	2327	1	4472	1	2083	1	4368	1	3683	1	4161	1	727	0.9986245	1899	0.9994734	TRUE	FALSE	FALSE
175	175_NCASD	NCASD	FBDHS	5	14041861	SNDHS467555	C	58652	0.9998125	28054	0.9997861	25634	0.9987907	31779	0.9999685	19764	0.999747	26913	1	30331	0.9998681	14095	0.9999291	20545	0.9999027	22403	0.9999554	TRUE	TRUE	FALSE
176	176_NCASD	NCASD	FBDHS	5	14046641	SNDHS467556	C	24226	1	21986	0.9999545	12949	0.9998455	19517	0.9999488	11457	1	5182	0.999807	11815	0.9996614	7705	1	7684	1	4889	1	TRUE	TRUE	FALSE
176	176_NCASD	NCASD	FBDHS	5	14047001	SNDHS467557	T	12778	0.9990609	11429	0.9993	6686	0.9995513	9939	0.9990945	6178	0.9996763	2466	0.9995945	5312	0.9990587	4285	0.9997666	3524	0.9991487	2107	1	TRUE	TRUE	FALSE
23	23_Epilepsy	Epilepsy	GWAS	5	3276582	rs61670327	G	16511	0.4973048	15618	0.67864	9942	0.5258499	13655	0.6087148	9065	0.5154992	11206	0.4765304	12797	0.4026725	7145	0.2552834	3700	0.3859459	3879	0.7231245	TRUE	TRUE	TRUE
317	317_SZ108	SZ108	GWAS	5	45364772	rs1501357	T	317	1	1140	0.9991228	291	1	954	1	466	1	21	1	39	1	6	1	928	1	2540	1	FALSE	FALSE	FALSE
319	319_SZ108	SZ108	GWAS	5	61302715	rs4391122	T	15789	0.9998733	9376	0.9997867	6518	0.9992329	12244	1	6769	1	7476	0.9998662	11046	0.9990947	265	1	9521	0.9995799	12683	0.9999212	TRUE	FALSE	FALSE
39	39_Epilepsy	Epilepsy	GWAS	5	66856430	rs39861	A	16778	0.738467	16948	0.7756077	10441	0.7346997	15127	0.8140411	9854	0.7205196	7362	0.597392	11040	0.4847826	6254	0.4758555	2997	0.8468468	4700	0.7661702	TRUE	TRUE	TRUE
320	320_SZ108	SZ108	GWAS	5	89450513	rs16867576	G	467	1	104	1	454	1	787	1	348	1	2399	1	1201	1	11	1	443	1	12	1	FALSE	FALSE	FALSE
34	34_Epilepsy	Epilepsy	GWAS	6	52971097	rs492146	G	26289	0.6676557	21123	0.7326611	16808	0.6761066	23920	0.7299331	12520	0.7047125	7091	0.6551967	5252	0.8261615	266	0.556391	2861	0.8769661	1201	0.9242298	TRUE	FALSE	TRUE
40	40_Epilepsy	Epilepsy	GWAS	6	79855119	rs346291	C	5275	0.5943128	5566	0.4854474	4009	0.6018957	7837	0.5109098	3996	0.5738238	8705	0.9954049	17340	0.6865629	13785	0.8421473	5407	0.8250416	5916	0.8500676	TRUE	TRUE	TRUE
330	330_SZ108	SZ108	GWAS	6	96011774	rs117074560	T	377	1	9	1	434	1	458	1	667	1	5	1	32	1	6	1	49	1	717	1	FALSE	FALSE	FALSE
334	334_SZ108	SZ108	GWAS	7	105288616	rs6466055	A	1109	0.9990983	16	1	703	1	1409	1	543	1	30	1	2188	1	124	1	6	1	3758	0.9997339	FALSE	FALSE	FALSE
335	335_SZ108	SZ108	GWAS	7	110408835	rs211829	T	1423	1	547	1	1126	0.9991119	2127	0.9985896	869	1	2577	1	19	1	14	1	69	1	13	1	TRUE	FALSE	FALSE
336	336_SZ108	SZ108	GWAS	7	111258858	rs13240464	A	2591	1	2001	1	1514	1	2818	1	1744	1	3050	1	84	1	4038	1	841	1	1544	1	TRUE	FALSE	FALSE
244	244_NCASD	NCASD	FBDHS	7	131327873	bvb4	G	15849	0.9998107	5602	1	3906	1	5771	0.9998267	3640	0.9964286	2884	1	3645	0.9994513	4593	0.9993468	2879	1	851	1	TRUE	FALSE	FALSE
337	337_SZ108	SZ108	GWAS	7	131882503	rs7801375	A	7066	0.9995754	3704	0.9991901	4608	1	6949	1	3824	1	12907	0.9996901	11049	0.9997285	7431	0.9994617	5782	0.9987893	4479	1	TRUE	TRUE	FALSE
338	338_SZ108	SZ108	GWAS	7	137390097	rs3735025	G	750	0.9973333	31	1	435	1	1761	1	176	1	12	1	3	1	4	1	3	1	1	1	FALSE	FALSE	FALSE
331	331_SZ108	SZ108	GWAS	7	1977809	rs6461049	C	1528	1	1037	1	1485	1	516	1	1243	0.9991955	2960	0.9993243	4158	1	18	1	784	1	2553	1	TRUE	FALSE	FALSE
332	332_SZ108	SZ108	GWAS	7	72286330	rs12699131	C	18956	0.999789	15831	0.9998737	7408	0.999865	11689	0.9999144	7653	0.9998693	10406	1	18861	0.9996819	11138	0.9999102	16346	0.9998165	20009	0.9998501	TRUE	TRUE	FALSE
333	333_SZ108	SZ108	GWAS	7	86798309	rs12704290	G	19552	0.999642	15364	0.9998047	8822	0.9997733	15216	0.9998686	8782	0.9997723	10442	0.9996169	14483	0.999931	3644	1	4101	1	5340	0.9996255	TRUE	TRUE	FALSE
345	345_SZ108	SZ108	GWAS	8	110473531	rs36068923	A	151	1	25	1	234	1	1138	1	114	1	5	1	4362	0.9997707	51	1	3	1	20	1	FALSE	FALSE	FALSE
346	346_SZ108	SZ108	GWAS	8	142231571	rs4129585	C	41989	0.9999762	15056	0.9998672	14220	0.9999297	20619	0.9998545	12020	1	5317	1	12346	0.999838	6218	0.9996784	5069	0.9996054	7858	1	TRUE	TRUE	FALSE
340	340_SZ108	SZ108	GWAS	8	27584609	rs73229090	G	11467	0.9999128	2295	0.9986928	2654	0.9996232	5115	1	2575	1	6700	0.9998507	9484	0.9995782	3981	1	2055	1	1756	1	TRUE	TRUE	FALSE
339	339_SZ108	SZ108	GWAS	8	4323321	rs10503253	T	3600	0.9997222	4440	1	1803	1	3313	1	1703	1	2554	0.9992169	2741	0.9996352	41	1	584	1	44	1	TRUE	FALSE	FALSE
341	341_SZ108	SZ108	GWAS	8	59787909	rs6984242	A	98	1	14	1	207	1	603	1	466	1	1532	0.9986945	6	1	5	1	6	1	1	1	FALSE	FALSE	FALSE
343	343_SZ108	SZ108	GWAS	8	88579853	rs11995572	G	1574	1	12	1	432	1	914	1	593	1	11	1	7	1	3	1	70	1	5	1	FALSE	FALSE	FALSE
344	344_SZ108	SZ108	GWAS	8	88748081	rs7004633	T	1567	0.9987237	4615	0.9991333	1030	1	1635	1	1162	1	1675	1	5192	0.9996148	3438	0.9997091	1454	1	655	0.9984733	TRUE	FALSE	FALSE
26	26_Epilepsy	Epilepsy	GWAS	9	10260263	rs2475335	C	6400	0.1895313	10656	0.2408971	5171	0.220847	8670	0.1995386	4754	0.2347497	10495	0.265555	7338	0.5133551	6862	0.001020111	4307	0.3703274	2420	0.08801653	TRUE	TRUE	TRUE
27	27_Epilepsy	Epilepsy	GWAS	9	10505224	rs72700966	C	6436	0.492542	10672	0.5538793	4805	0.5096774	8840	0.3026018	3394	0.5212139	5069	0.9790886	12851	0.7287371	14544	0.425055	16563	0.7196764	15706	0.8186044	TRUE	TRUE	TRUE
347	347_SZ108	SZ108	GWAS	9	82125025	rs11139497	A	1066	1	4468	0.9995524	935	0.9989305	1570	1	932	1	2272	1	858	1	11	1	455	1	9	1	TRUE	FALSE	FALSE
41	41_Epilepsy	Epilepsy	GWAS	9	85315130	rs2841498	A	22225	0.03590551	23376	0.0006844627	11764	0.03952737	18425	0.0005427408	10779	0.0308934	5107	0.001566477	8683	0.0003455027	5634	0.001597444	5103	0.0005878895	5754	0.001390337	TRUE	TRUE	FALSE
407	407_SZ108	SZ108	GWAS	X	21362147	rs1378559	T	3343	1	6546	0.9998472	1787	1	2996	1	1764	1	4319	0.9997685	2767	1	4018	1	878	1	2108	1	TRUE	FALSE	FALSE
406	406_SZ108	SZ108	GWAS	X	6111491	rs12845396	C	673	1	2639	0.9996211	486	1	1352	0.9992604	429	1	2739	0.9996349	3915	1	4034	1	405	1	66	1	FALSE	FALSE	FALSE
