# Supplementary material for: Parallel functional testing identifies enhancers active in early postnatal mouse brain
Source: eLife journal article supplement (doi:10.7554/elife.69479), 2021-10-04
Supplement: supp [file elife-69479-supp-v1.zip › elife_poa_e69479_Supplementary_file_8.xlsx]

## Sheet: METADATA 
# High-throughput sequencing metadata template. (Version: April 28, 2020)
# All fields in this template must be completed.
# See METADATA EXAMPLES in tabs at the foot of this page.
# Field names (in blue on this page) should not be edited. Hover over cells containing field names to view field content guidelines.
# Human data. If there are patient privacy concerns regarding making data fully public through GEO, please submit to NCBI's dbGaP (http://www.ncbi.nlm.nih.gov/gap/) database. dbGaP has controlled access mechanisms and is an appropriate resource for hosting sensitive patient data.
SERIES
# This section describes the overall study. Complete all fields.
title	Parallel functional testing identifies enhancers active in early postnatal mouse brain
summary	Cis-regulatory elements such as enhancers play critical regulatory roles in modulating developmental transcription programs and driving cell-type specific and context-dependent gene expression in the brain. The development of massively parallel reporter assays has enabled high-throughput functional screening of candidate DNA sequences for enhancer activity. Tissue-specific screening of in vivo en…
overall design	1) Massively Parallel Reporter Assays (MPRA) testing 408 ~900 bp human amplicons in AAV vector: 4 paired RNA and DNA replicates, 1 AAV plasmid library; 1 high-PCR-cycle technical replicate. Illumina PE150 reads. 2) Massively Parallel Reporter Assay with 16 ~900 bp mouse amplicons with human orthologs (mini_MPRA): 4 RNA replicates and 1 AAV plasmid library. Illumina PE75 reads.
contributor	Jason T. Lambert
contributor	Linda Su-Feher
contributor	Karol Cichewicz
contributor	Tracy L. Warren
contributor	Iva Zdilar
contributor	Yurong Wang
contributor	Kenneth J. Lim
contributor	Jessica Haigh
contributor	Sarah J. Morse
contributor	Cesar P. Canales
contributor	Tyler W. Stradleigh
contributor	Erika Castillo
contributor	Viktoria Haghani
contributor	Spencer Moss
contributor	Hannah Parolini
contributor	Diana Quintero
contributor	Diwash Shrestha
contributor	Daniel Vogt
contributor	Leah C. Byrne
contributor	Alex S. Nord
supplementary file	STAR408_counts.csv
supplementary file	miniMPRA_counts.csv
SAMPLES
# Thoroughly describe each of the biological Samples under investigation. Tissue/cell type/cell line information is required.
# Include all biological and experimental variables in characteristics columns (for example, characteristics: tissue, characteristics: cell type, characteristics: treatment, characteristics: genotype, characteristics: disease state or any clinical variables, etc...)
# -> -> KEEP SCROLLING TO THE RIGHT FOR IMPORTANT FIELDS; RAW AND PROCESSED FILES MUST BE LISTED IN THIS SECTION -> ->
Sample name	title	source name	organism	characteristics: genetic material	characteristics: developmental stage	characteristics: vehicle	characteristics: library strategy	processed data file	raw file
L1-gDNA_S70	L1-gDNA_S70	Mouse cortex	Human	DNA	P7	AAV library	PE150	STAR408_counts.csv	STARR-L1-gDNA_S70_L006_R1_001_fastq.gz
L1-gDNA_S70	L1-gDNA_S70	Mouse cortex	Human	DNA	P7	AAV library	PE150	STAR408_counts.csv	STARR-L1-gDNA_S70_L006_R2_001_fastq.gz
OldL1-cDNA_S75	OldL1-cDNA_S75	Mouse cortex	Human	RNA	P7	AAV library	PE150	STAR408_counts.csv	STARR-OldL1-cDNA_S75_L006_R1_001_fastq.gz
OldL1-cDNA_S75	OldL1-cDNA_S75	Mouse cortex	Human	RNA	P7	AAV library	PE150	STAR408_counts.csv	STARR-OldL1-cDNA_S75_L006_R2_001_fastq.gz
L2-gDNA_S71	L2-gDNA_S71	Mouse cortex	Human	DNA	P7	AAV library	PE150	STAR408_counts.csv	STARR-L2-gDNA_S71_L006_R1_001_fastq.gz
L2-gDNA_S71	L2-gDNA_S71	Mouse cortex	Human	DNA	P7	AAV library	PE150	STAR408_counts.csv	STARR-L2-gDNA_S71_L006_R2_001_fastq.gz
OldL2-cDNA_S76	OldL2-cDNA_S76	Mouse cortex	Human	RNA	P7	AAV library	PE150	STAR408_counts.csv	STARR-OldL2-cDNA_S76_L006_R1_001_fastq.gz
OldL2-cDNA_S76	OldL2-cDNA_S76	Mouse cortex	Human	RNA	P7	AAV library	PE150	STAR408_counts.csv	STARR-OldL2-cDNA_S76_L006_R2_001_fastq.gz
L3-gDNA_S72	L3-gDNA_S72	Mouse cortex	Human	DNA	P7	AAV library	PE150	STAR408_counts.csv	STARR-L3-gDNA_S72_L006_R1_001_fastq.gz
L3-gDNA_S72	L3-gDNA_S72	Mouse cortex	Human	DNA	P7	AAV library	PE150	STAR408_counts.csv	STARR-L3-gDNA_S72_L006_R2_001_fastq.gz
OldL3-cDNA_S77	OldL3-cDNA_S77	Mouse cortex	Human	RNA	P7	AAV library	PE150	STAR408_counts.csv	STARR-OldL3-cDNA_S77_L006_R1_001_fastq.gz
OldL3-cDNA_S77	OldL3-cDNA_S77	Mouse cortex	Human	RNA	P7	AAV library	PE150	STAR408_counts.csv	STARR-OldL3-cDNA_S77_L006_R2_001_fastq.gz
High35-L4-cDNA	High35-L4-cDNA	Mouse cortex	Human	RNA	P7	AAV library	PE150	STAR408_counts.csv	STARR-High35-L4-cDNA_S81_L006_R1_001_fastq.gz
High35-L4-cDNA	High35-L4-cDNA	Mouse cortex	Human	RNA	P7	AAV library	PE150	STAR408_counts.csv	STARR-High35-L4-cDNA_S81_L006_R2_001_fastq.gz
L4-gDNA_S73	L4-gDNA_S73	Mouse cortex	Human	DNA	P7	AAV library	PE150	STAR408_counts.csv	STARR-L4-gDNA_S73_L006_R1_001_fastq.gz
L4-gDNA_S73	L4-gDNA_S73	Mouse cortex	Human	DNA	P7	AAV library	PE150	STAR408_counts.csv	STARR-L4-gDNA_S73_L006_R2_001_fastq.gz
NewL4-cDNA_S78	NewL4-cDNA_S78	Mouse cortex	Human	RNA	P7	AAV library	PE150	STAR408_counts.csv	STARR-NewL4-cDNA_S78_L006_R1_001_fastq.gz
NewL4-cDNA_S78	NewL4-cDNA_S78	Mouse cortex	Human	RNA	P7	AAV library	PE150	STAR408_counts.csv	STARR-NewL4-cDNA_S78_L006_R2_001_fastq.gz
Maxiprep_S80	Maxiprep_S80	Mouse cortex	Human	plasmid DNA library	P7	AAV library	PE150	STAR408_counts.csv	STARR-Maxiprep_S80_L006_R1_001_fastq.gz
Maxiprep_S80	Maxiprep_S80	Mouse cortex	Human	plasmid DNA library	P7	AAV library	PE150	STAR408_counts.csv	STARR-Maxiprep_S80_L006_R2_001_fastq.gz
S1	S1	Mouse cortex	Mus musculus	RNA	P7	AAV library	PE75	miniMPRA_counts.csv	STARR-s1-1kb-150311_S1_L001_R1_001.fastq
S1	S1	Mouse cortex	Mus musculus	RNA	P7	AAV library	PE75	miniMPRA_counts.csv	STARR-s1-1kb-150311_S1_L001_R2_001.fastq
S2	S2	Mouse cortex	Mus musculus	RNA	P7	AAV library	PE75	miniMPRA_counts.csv	STARR-s2-1kb-150311_S2_L001_R1_001.fastq
S2	S2	Mouse cortex	Mus musculus	RNA	P7	AAV library	PE75	miniMPRA_counts.csv	STARR-s2-1kb-150311_S2_L001_R2_001.fastq
S3	S3	Mouse cortex	Mus musculus	RNA	P7	AAV library	PE75	miniMPRA_counts.csv	STARR-s3-1kb-150311_S3_L001_R1_001.fastq
S3	S3	Mouse cortex	Mus musculus	RNA	P7	AAV library	PE75	miniMPRA_counts.csv	STARR-s3-1kb-150311_S3_L001_R2_001.fastq
S4	S4	Mouse cortex	Mus musculus	RNA	P7	AAV library	PE75	miniMPRA_counts.csv	STARR-s4-1kb-150311_S4_L001_R1_001.fastq
S4	S4	Mouse cortex	Mus musculus	RNA	P7	AAV library	PE75	miniMPRA_counts.csv	STARR-s4-1kb-150311_S4_L001_R2_001.fastq
Maxi	Maxi	Mouse cortex	Mus musculus	plasmid DNA library	P7	AAV library	PE75	miniMPRA_counts.csv	STARR-l-1kb-150311_S5_L001_R1_001.fastq
Maxi	Maxi	Mouse cortex	Mus musculus	plasmid DNA library	P7	AAV library	PE75	miniMPRA_counts.csv	STARR-l-1kb-150311_S5_L001_R2_001.fastq
PROTOCOLS
# Protocols applicable to only a subset of Samples can be included as additional columns of the SAMPLES section above instead.
growth protocol
treatment protocol	C57BL/6 mice from Jackson Laboratories were used for mouse experiments. All procedures were performed in accordance with the ARVO statement for the Use of Animals in Ophthalmic and Vision Research and were approved by the University of California Animal Care and Use Committee (AUP #R200-0913BC). Surgery was performed under anesthesia, and all efforts were made to minimize suffering. Neonatal mice…
extract protocol	Bulk forebrains were dissected from postnatal day (P)7 mice injected with the viral library at P0. Dissection included whole forebrain, separated into left and right hemispheres, after removing surface tissue and skull. Hemispheres were stored in RNAlater Stabilization Solution (Thermo Fisher #AM7020) for downstream dual DNA and RNA collection. Hemispheres were then physically homogenized and pro…
library construction protocol	We amplified the variable regions of the reporter library from cDNA and genomic (g)DNA using PCR with Phusion Hot Start II High Fidelity DNA polymerase (Invitrogen #F549S) using primers flanking the variable region within pscAAV-Hsp68-EGFP (forward primer, Amplicon PCR Primer F: GATCACTCTCGGCATGGAC; reverse primer, Amplicon PCR Primer R: GATGGCTGGCAACTAGAAGG). PCR consisted of 30 cycles (or 35, f…
library strategy	MPRA
DATA PROCESSING PIPELINE
# Data processing steps include base-calling, alignment, filtering, peak-calling, generation of normalized abundance measurements etc…
# For each step provide a description, as well as software name, version, parameters, if applicable.
data processing step	PE reads were trimmed using Ngmerge (v0.2_dev) in adaptor removal mode.
data processing step	Reads from were aligned to the human and mouse genomes (GRCh38, GRCm38) using bwa mem v0.7.17.
data processing step	Aligned reads in SAM format were converted to BAM format, and duplicates were removed using Picard Tools MarkDuplicates, v2.23.3.
data processing step	Reads per amplicon were counted using samtools view -F 0x0400 v1.10
data processing step
genome build	GRCh38 and GRCm38
processed data files format and content	CSV, read counts per MPRA amplicon
# For each file listed in the "processed data file" columns of the SAMPLES section, provide additional information below.
PROCESSED DATA FILES
file name	file type	file checksum
STAR408_counts.csv	CSV	9cdce71d31b0f0b3eaea618658fd7e9c
miniMPRA_counts.csv	CSV	016d05d8ada3ea4c6b214f7d787f026c
# For each file listed in the "raw file" columns of the SAMPLES section above, provide additional information below.
RAW FILES
file name	file type	file checksum	instrument model	single or paired-end
STARR-L1-gDNA_S70_L006_R1_001_fastq.gz	fastq	a22b017cd00472dab5345a29a98b2f26	Illumina HiSeq 4000	paired-end
STARR-L1-gDNA_S70_L006_R2_001_fastq.gz	fastq	ad8d8f1483f9105e8725188e3f656635	Illumina HiSeq 4000	paired-end
STARR-OldL1-cDNA_S75_L006_R1_001_fastq.gz	fastq	548f6c0c516bcd2ea13e4ae39f3282f7	Illumina HiSeq 4000	paired-end
STARR-OldL1-cDNA_S75_L006_R2_001_fastq.gz	fastq	cad28cfeeb432db1eb7ec088193c1f89	Illumina HiSeq 4000	paired-end
STARR-L2-gDNA_S71_L006_R1_001_fastq.gz	fastq	054c460f1410adcc1da8fa2463501e44	Illumina HiSeq 4000	paired-end
STARR-L2-gDNA_S71_L006_R2_001_fastq.gz	fastq	7c6079c7d871889a0421fe5dfd8393d1	Illumina HiSeq 4000	paired-end
STARR-OldL2-cDNA_S76_L006_R1_001_fastq.gz	fastq	1b357a5104fd25e0a611b55ecc277a0d	Illumina HiSeq 4000	paired-end
STARR-OldL2-cDNA_S76_L006_R2_001_fastq.gz	fastq	01e1aaf4157733f130f83bb59e8ab9a3	Illumina HiSeq 4000	paired-end
STARR-L3-gDNA_S72_L006_R1_001_fastq.gz	fastq	953daa0ae7bc66b1e714612f5b833065	Illumina HiSeq 4000	paired-end
STARR-L3-gDNA_S72_L006_R2_001_fastq.gz	fastq	d65c4a996e02c82ea57e805093d50dfc	Illumina HiSeq 4000	paired-end
STARR-OldL3-cDNA_S77_L006_R1_001_fastq.gz	fastq	59a178d1c6050e45b4d4ff03935f8dfa	Illumina HiSeq 4000	paired-end
STARR-OldL3-cDNA_S77_L006_R2_001_fastq.gz	fastq	7eb90903a898cab79401f800f5405dd4	Illumina HiSeq 4000	paired-end
STARR-High35-L4-cDNA_S81_L006_R1_001_fastq.gz	fastq	1cc6fc8205bab6b2661955f095059ff4	Illumina HiSeq 4000	paired-end
STARR-High35-L4-cDNA_S81_L006_R2_001_fastq.gz	fastq	78b938eee59052a4f2fa3963b049c5b8	Illumina HiSeq 4000	paired-end
STARR-L4-gDNA_S73_L006_R1_001_fastq.gz	fastq	acadcc2977f4711eb21b26a9109c60b4	Illumina HiSeq 4000	paired-end
STARR-L4-gDNA_S73_L006_R2_001_fastq.gz	fastq	3ea5541e0fc0b463e1c3dac91d5657f5	Illumina HiSeq 4000	paired-end
STARR-NewL4-cDNA_S78_L006_R1_001_fastq.gz	fastq	65aff6a76d4c34c92b67835b3b30ecce	Illumina HiSeq 4000	paired-end
STARR-NewL4-cDNA_S78_L006_R2_001_fastq.gz	fastq	3cdf11eb9d2582ddab6a38677d5d08ab	Illumina HiSeq 4000	paired-end
STARR-Maxiprep_S80_L006_R1_001_fastq.gz	fastq	9eb9862b0b29bcd8884570f1df96cc04	Illumina HiSeq 4000	paired-end
STARR-Maxiprep_S80_L006_R2_001_fastq.gz	fastq	6c04110ca1397fec41604f08c1422539	Illumina HiSeq 4000	paired-end
STARR-s1-1kb-150311_S1_L001_R1_001.fastq	fastq	a506c3643b7909cf06398303e2640a93	MiSeq	paired-end
STARR-s1-1kb-150311_S1_L001_R2_001.fastq	fastq	db003a732e82363ba3a2027b1ec10944	MiSeq	paired-end
STARR-s2-1kb-150311_S2_L001_R1_001.fastq	fastq	58eb7f3fa7d0839b849f1d384e5b3b7b	MiSeq	paired-end
STARR-s2-1kb-150311_S2_L001_R2_001.fastq	fastq	e98c4f1e49ca97ebd1b77ee3c7157296	MiSeq	paired-end
STARR-s3-1kb-150311_S3_L001_R1_001.fastq	fastq	a3edf2b30b91693c6f510e479aa4082d	MiSeq	paired-end
STARR-s3-1kb-150311_S3_L001_R2_001.fastq	fastq	1e1d91c7cb0f6147041cb9ae1240d92f	MiSeq	paired-end
STARR-s4-1kb-150311_S4_L001_R1_001.fastq	fastq	3243936fc25243276f9cb389034aa937	MiSeq	paired-end
STARR-s4-1kb-150311_S4_L001_R2_001.fastq	fastq	54e18636d81295c82c4782c5ad18aee6	MiSeq	paired-end
STARR-l-1kb-150311_S5_L001_R1_001.fastq	fastq	22dcef13a3800439520f996189001b5b	MiSeq	paired-end
STARR-l-1kb-150311_S5_L001_R2_001.fastq	fastq	661c59658ad0cf852522d37718dad685	MiSeq	paired-end
# For paired-end experiments, list the 2 (or more) fastq files from the same run. For SOLiD experiments, list the 4 file names (include "file name 3" and "file name 4" columns).
PAIRED-END EXPERIMENTS
file name 1	file name 2
STARR-L1-gDNA_S70_L006_R1_001_fastq.gz	STARR-L1-gDNA_S70_L006_R2_001_fastq.gz
STARR-OldL1-cDNA_S75_L006_R1_001_fastq.gz	STARR-OldL1-cDNA_S75_L006_R2_001_fastq.gz
STARR-L2-gDNA_S71_L006_R1_001_fastq.gz	STARR-L2-gDNA_S71_L006_R2_001_fastq.gz
STARR-OldL2-cDNA_S76_L006_R1_001_fastq.gz	STARR-OldL2-cDNA_S76_L006_R2_001_fastq.gz
STARR-L3-gDNA_S72_L006_R1_001_fastq.gz	STARR-L3-gDNA_S72_L006_R2_001_fastq.gz
STARR-OldL3-cDNA_S77_L006_R1_001_fastq.gz	STARR-OldL3-cDNA_S77_L006_R2_001_fastq.gz
STARR-High35-L4-cDNA_S81_L006_R1_001_fastq.gz	STARR-High35-L4-cDNA_S81_L006_R2_001_fastq.gz
STARR-L4-gDNA_S73_L006_R1_001_fastq.gz	STARR-L4-gDNA_S73_L006_R2_001_fastq.gz
STARR-NewL4-cDNA_S78_L006_R1_001_fastq.gz	STARR-NewL4-cDNA_S78_L006_R2_001_fastq.gz
STARR-Maxiprep_S80_L006_R1_001_fastq.gz	STARR-Maxiprep_S80_L006_R2_001_fastq.gz
STARR-s1-1kb-150311_S1_L001_R1_001.fastq	STARR-s1-1kb-150311_S1_L001_R2_001.fastq
STARR-s2-1kb-150311_S2_L001_R1_001.fastq	STARR-s2-1kb-150311_S2_L001_R2_001.fastq
STARR-s3-1kb-150311_S3_L001_R1_001.fastq	STARR-s3-1kb-150311_S3_L001_R2_001.fastq
STARR-s4-1kb-150311_S4_L001_R1_001.fastq	STARR-s4-1kb-150311_S4_L001_R2_001.fastq
STARR-l-1kb-150311_S5_L001_R1_001.fastq	STARR-l-1kb-150311_S5_L001_R2_001.fastq
