# Supplementary material for: Parallel functional testing identifies enhancers active in early postnatal mouse brain
Source: eLife journal article supplement (doi:10.7554/elife.69479), 2021-10-04
Supplement: supp [file elife-69479-supp-v1.zip › elife_poa_e69479_Supplementary_file_9.csv]

UNIQID	Left.Primer	Tm.Left	Right.Primer	Tm.Right	Amplicon.Length	Primer.ID	Amplicon.Range_hg19	Group	Notes	chr	Chr_GRCh38_pred	Amplicon_Start_GRCh38	Amplicon_End_GRCh38	Amplicon_length_GRCh38	PCR_efficiency	Sequence_GRCh38	GC_content
1_CACNA1C	TTGTAATGGAGCTAAACCTGGGA	59.41	TGCATGAGATGTACACCAGGC	60.407	916	1	chr12:2330922+2331837	CACNA1C		12	12	2221756	2222671	916	99.8% (1 x 2)	TTGTAATGGAGCTAAACCTGGGATAATTTCTCTCCTCTATTAATCACCAGAGGGCTGGGTAACTAAGTTAGGATGCGTCCATATGATGGAACACCATGTAGCCATTCAAATGATAACCTAGAAGGACAGTTAATGGCACATAAAGATGTTCAACTGCACTGCTAAATGAACAAACATAGAAAGTTATCTACAATATGATCCCAAATTTTATAAGATATATAACCTCTATTTACATCTCATATGAGTGTAGACAGGATATACTATACCCTGGAAGGTATAATAGGTATACATTAGAGTGTTAATGATAAGCCAATTCAGGGAACAAAATTACAAATTATTTTATTTCATTCTCTATTTATGATTCTTCTAAATTTTCTAACATAAACATTTGAAATAAAA…	0.36353711790393
10_CACNA1C	CAGCATGATTCCTAACCAAGGC	59.64	AGTGCTTTCTGTCACCCAGG	59.891	921	10	chr12:2368173+2369093	CACNA1C		12	12	2259007	2259927	921	99.5% (1 x 2)	CAGCATGATTCCTAACCAAGGCCTTTTCATAAGTGGAAGTCTTTCACCTGGCCCTGGGGAAATCACGGAACTCAATATTTCCTTCACTTAATTGTTTTTCTTTTCCATTTAAGGAAAGGTAGCTTAAAGCAGTGGTTCTCAGAATATGGCCCTGAACCAGCTGCATCAAAATCACCTGGGAACCTACTAGAAGTGCCGATTCTACAAAAAGGAAGCTCCCCACACCCCGCCCTGCCCCACACGGGACCCAGCAGTTTGTGTTCTAACAAGCCCACCAGGTTTTTGTGATGTATGCTGAAGTTTGAGACTGGTTAGCTTAAAACAGCCTCTGAGAGGGGCTGCAAGCCACTCTTTATTTGGATCATAACTAAGTAGTTAAAACATCCCTGAGTGAATTCA…	0.441910966340934
2_CACNA1C	GGGATATCCTACTTGGCTCTGC	60.03	TCCAGAGGTATTCTCTCCCGT	59.43	904	2	chr12:2332277+2333180	CACNA1C	Via Primer-BLAST.	12	12	2223111	2224014	904	99.5% (1 x 2)	GGGATATCCTACTTGGCTCTGCAAGACTCATAGCATACTGGACAATGTTGTCTGCATCGGAATGTCTTACTGGGGAGTCACACCTCCAAAAAGAAGCTGTGTGGTGAATGGGTCCAAACATAAGGGTTTGAGCCCCTGTTTTCAGCTGGGATTTTTGGGTAAAGGGAGATGAAGCAGCCAGGTCTAACCAACTGCAGAGGTTTATTTCTTGGGGACTCCCAGCTCCATTGAGGTGTAGAAAATATAGCACATACCAGTTACCAACAAGGATACCTGTTCCTGGATGGAACTGCCTGGTTGGAAAGAATGCTGGTGGTCAGTAGTGCCTTCTGATCCTAAGAAGAGGACCCTAACCTGGCCATTTTGAATAAGGGCCCCATAGCTGCTGATTAAGTGTGT…	0.413716814159292
3_CACNA1C	TCTAGAGCTCTCTTTTGAACTGCT	59.474	ATAATTCTCTTTGTGCAATGCTACA	57.605	915	3	chr12:2333508+2334422	CACNA1C		12	12	2224342	2225256	915	99.5% (1 x 2)	TCTAGAGCTCTCTTTTGAACTGCTAATCCCCCTGGCGGAGCCTCTGATCCTGGTTATCCAGCATTCTTCTAGATTTAAGGTTGAAACATGATTTAAGGTCATGAATGCATGACCTTCCCAGACTCCCTTGTACATGAGCTCCCACATTCCCAGCCCCTGTTCTGCTCCACCCCTTGTGGTGATAGCCAGGGTGGTCAGCTGCATTGCATGTTAGTAGTAAGGGAAGAATGGGGTGGTGGGTCCAGAGTTGTGTGTTATAAGATGACTTTGGAGGTCAGGCTGTTGTTTTGGCTCACTTTGGGATTTTGGGGAGTAGCTTACTTTGCCATCAATTTCCTGATGAAGAAAAGGCAACTTAGCATTCTTCGTATAAGTAAACAGGTCAGTGTTGGAGATAAT…	0.431693989071038
4_CACNA1C	TCGTCTTCCTGCTAACCCTT	58.359	CAACAAATGCATACCCTCCATCT	59.044	920	4	chr12:2340631+2341550	CACNA1C		12	12	2231465	2232384	920	99.7% (1 x 2)	TCGTCTTCCTGCTAACCCTTTTGAGAGTGGGAGGCACGCATTACTTAATTATAAGAAAATGAGAAAACTGAAGGCAGAGACAACAAATGAGCTATCCAAGATCACAAATGGGTTTTGTTTCTGTTTCTGATTTTGTTTTTAAAATCAGAGCGGAGATCAGAACCATCATCTCCTGGTCTTCCTATTTTGCAAGCAGCGCCCGGTACACACCTGTTGGATACACAGCTTGAACACAGGACCTAATTGTTCGCTAGGCATGAACAACAGGGTGTTTTGACTCCTGCAAGCTGCTAACAGTCTTGCACAGTGCTAGACTGTGCACTAGCACTATCTAGAATGTGATCCTTTGACCGGTAGGCAGGTTATCACTTACCAGTTTTTGGCAAGATCAGGAGCTTG…	0.375
5_CACNA1C	AGATTTTCTCCCCTCTGCACC	59.717	CCAACCCGAACCTGCTGAAT	60.609	903	5	chr12:2344516+2345418	CACNA1C		12	12	2235350	2236252	903	99.8% (1 x 2)	AGATTTTCTCCCCTCTGCACCCAGCTCAGCTGCTGGGCACTGCACCAACCCTGATGTGGCAGGACGAGGATGCCAAGGGCTGGAGCAACCCAAGGCTAATTTTTTTTCACCCAGAAAATCATGGGTTAGATATTTTTAAATTGCTGGCTTATTTTGCAGCATTTTTATTATTTCTGGTAGATGAGGAGATCTTGCCATCACTAGGGGTCCATCTCTCCCACATGCTGCCTTGCAGTGCTTCTCTACGTAGACCATCTCTGGGTGATGCCGGTTTACCCAGGGATGGGATGGGGTGCAGTGTATTACGCTTCAGGTTGTATTTGTGGCCCCCTTGGGAATCAGTTGCAAAGCAGGGCCGTGTCTGATGTGATGGCCAGGACAAAGGTCTGAATGACTAAC…	0.475083056478405
6_CACNA1C	TGCCTTGTGATACTCTTGTTCTTC	59.003	TGGAGCTAGGGAGGGCAG	60.042	929	6	chr12:2346147+2347075	CACNA1C		12	12	2236981	2237909	929	99.7% (1 x 2)	TGCCTTGTGATACTCTTGTTCTTCTGGTTTGAGTTTTGGTAGATAAGCACATCTGAGTCTTGCTGTGTTAATGTGTCTGTATTTTGGTGTATCTGCTTGCTTGTCGTGTGGGGCATATGCCAAGTCCAGTAGTGGATGGGCTGGGGAAGACCAGACCTTATCACATGGTGCCCTTGGGGGGAAATCTTAATTCCAATGTGTGAAACCAGTGAAAGTATGATTTTCTGGGTCAATTTTAAAAATATACGTTCAAGCAAAAAGCAACCTGTTATCTCTTCTCTTTCTGCCTCTGCACACAGCAGCCTCCATTGCCTAGGGTATGATAGTGTGGGTTCACTTTGTCCATCTCATTTGGATGACATCAGCGAAGATGCATTCTGTATCTCTCCACTGAGGCCT…	0.435952637244349
7_CACNA1C	AGCTCCCTTCCCTGTTTGTG	59.889	CATGCCTGGAGCCCTATCAG	59.964	920	7	chr12:2348753+2349672	CACNA1C		12	12	2239587	2240506	920	99.7% (1 x 2)	AGCTCCCTTCCCTGTTTGTGACTGTCCCTCTTCCCTCCCACTCGCCTCCCACGCTGTCCCCCACCCCTGCCTGGTTTCCAATTTTAGCGGTGTTACCAGGGCAGGTTTTCAGGAAGCCTGCTCCAGTGGCTCTCTCCTGGGCCATTTCCACAGAGGCTGTGTGCCCGGCTACCATTCCCTAAGGCTCAGCCATTGCGCCCATCTGTTCCCCGGGCTGCAGCCAGCGAGCATCTGCGGGGGGCGGTGAAGGCTGAGGATGCCCAGACAAGGGGCAGGGAGGGCTGGCCCACGTGATGGCCAGGGGAGTGGGATGCCCAAGGGAAATGTCATAAAGGGTCCACTGGTTGGGAAAAAATGGAAAATGGAAATAAGGTTAAAATTGAAATGTTTTTAAAAAGT…	0.479347826086957
8_CACNA1C	CGTGGGGACAGTTAAGGTGA	59.317	TTGCAGGAGTCAAAGGGAAGA	59.226	916	8	chr12:2355341+2356256	CACNA1C		12	12	2246175	2247090	916	99.7% (1 x 2)	CGTGGGGACAGTTAAGGTGAACAGTGCCCACAGTCAGTGCTGTGGCAGGACAACTGCAGTGGGGCAGGCTCGGCAGAGCTGGGCAGGGGATGCAGATGCTGGAGACCTTGCTGCCCAGCAGATGAGAGTGGACCCAATTCTGTAGATCGGGGGCCGAGGCTGAATTCTGAGCAGGAAAGTAATCTGCTGAATAGGAGGCTGTAGTAAGGCCTTTTAGATGGTGGCTCCCGGAGTGAACAGGATCCTGAATCTCAGGCTTTCCTTATCCCACTGAGCCATGCCTCCCTGCCTGAAACGTGTTTCTGAGTAATAGCAGCTAACACTTACACAGTGCTTCCTGTGTAATAGGCACTCCTGTAACTGCTGGACCCATGACGACTCTGTGCAATTCATACCGTT…	0.526200873362445
9_CACNA1C	TCCTGGCACCTCCTCTGATT	60.253	AGAAGGGGTTTGACCTAACAGG	59.624	920	9	chr12:2361001+2361920	CACNA1C		12	12	2251835	2252754	920	99.8% (1 x 2)	TCCTGGCACCTCCTCTGATTGATCCTAAATCACTTTCTCACTCTGGCCTTCGGTTTCTGCATCTGTTAAGAGGGCTAATGAAACCTGTTTCTTACTGCAACTTGACACCATGAAAATTTAGTCTCTCATCTGCAGCAGGCTTAGGCAAAGTGGCTGGCCACATAAAACAGCTTGAATCCTTGAGCATGGTGGATGGAGTTTGTTTAATGAGTGAAGCTGTGTAGCCCACTCCATGTCTGTCCTACCATTAAAATTTTTATTGTTATTTGTGAAGTATCCACTGGAGTTCAGAAAAAGACTGCACACCACTAAATCAAGTTGGCTCAGCTCCTGCTGCGGTTAAAATGAGTGCTGTAACCCCAATTAATAACGATTTTTTTCCACCAGAGATGGCTGCTT…	0.46195652173913
100_SCN1A	AGCTGATTTGTCTGACTCTAGCC	60.12	TGGCTGAGAAATATCATTTGGCG	59.68	875	100	chr2:166960448+166961322	SCN1A	Via Primer-BLAST.	2	2	166103938	166104812	875	99.8% (1 x 2)	AGCTGATTTGTCTGACTCTAGCCCTAGTTTCTTTCCATTATATCAATTTCCTGGAAATGTATCTCTGTTCATGGCATAGTGCCTGACACTATGCTTATTAATATCTTTTGAATAAAAGAACCACTGAGTGATTTGAAATAAAACTAAATTTAGTTAGTTAATTTTATTGGTGGTATATAGAGATAGTAGGAAAAATAATTGAAAAGAGACATAAACAGATTTGCCAATACTTTCTAAGAAAAATTATGGAACTAGAGTTTAGTCAAAATGAATGCTTTCATTGTTAGAATTCAACTTTAATCTTTGCAGAATACAAACAAAGACCCATTTTCTAGAAGAAGTAACAGGGAAGAGAGAGTAAGAAAGAGATAATGATGAACATTGTCTAATGTTACAGCA…	0.382857142857143
11_CACNA1C	GGGCAAATCACTTAACCCTTGC	60.354	CCAGATAGAGAGGGCATCTGC	59.724	920	11	chr12:2373676+2374595	CACNA1C		12	12	2264510	2265429	920	99.7% (1 x 2)	GGGCAAATCACTTAACCCTTGCAATCATGCCAAGTTGAGAGCATTTTCCTAAATGCTGTGGCTCAGAGATGGCTGTGTGCTCGTGGTTCCTCCTGTTTCTCCCTAACCCTCTTCCACATGGGTTTTTTACTGCCCGATCAGGGTTTGGGGAATGATTGGCAGCCCGGAGGCCAGCCAGCCCTTTTGGCAATCCAGTCAAATCTGCCCACTGGCTGATGAAACATGGACTCCCTTGGCAGCGAGTACTTCCTCAAGAGATATCTTGCTTAAAATTGATGGCCCCCCTTTGGCTTTGCTATTCCCCATGCCCTTGGTGGGGCAGAGAGTTAGTTCCATCCCAAGTTCTTCTCCATTTGCCAGAGTCCACCTCCACCCCAGCCCAGAGCTGTTTGCTCTGGC…	0.515217391304348
12_CACNA1C	TGATCTGGAAAAGGGAAGGTTTC	58.593	CCTTGCCACACAGAGCCT	59.567	919	12	chr12:2383540+2384458	CACNA1C		12	12	2274374	2275292	919	99.6% (1 x 2)	TGATCTGGAAAAGGGAAGGTTTCCTTTTGCCCCATGGAGAGACGTCCTGAGACACTTCATCAACCAGGAAGGCTCCCAGGCAGCCACTGGGTTGCAGTGAAAGTTTTCAGCCGCTGGTGACTGCTCTGGTGAGACTTGTGAGAGAGAACAGTGACGGTGAGCACAGCAGCCCCTCAGAAAGCAAACCAGGGAGTGGCTTCCCGACGTGCACGGTTTCTAATTCACACGGTCCCTGCATAAGCTAGGCATTCCTGTATCCTGTTTTCACATGAGGAAACTGAGGCCCCTGGAACTCACGTAGTTTGCCCAAGGCCATCTAACTAGGAGGCCGTAATTAGTGAAGCTGGGATTTACACCTAGGGCTGTCTGATTCCGAAGCTGGGCTCTTTCCACGGTATG…	0.523394994559304
13_CACNA1C	TGAGGGCTGATAGGGAAGAG	57.91	ACAGTTGAAATATGTGCAGTTTGTT	58.43	880	13	chr12:2386595+2387474	CACNA1C	Via Primer-BLAST.	12	12	2277429	2278308	880	99.3% (1 x 2)	TGAGGGCTGATAGGGAAGAGGACTTCTCTTCTTGATTCTCCATAGCTGTTTCCCAACTGTTGCTCTCTAACAAAAAAACCCCTTCAGAACCCTCAGCCCTGCTCAGAAATCTAAGGAGGCTTCAGGCAGCAACAGTGGGGTCCACCCCACCCTGAAGGGCTGCTGCAAAGATCTCCAGGAGGAGGCCCCCAACACCATTCCTCTTGAAGGTCCCAGTTCAGTGCGGCTTGAGTCCTTCACCTCTGAGTCTCAGCCAGGCAACATCCGAAGGAGCTGAGGAAGCCTTCTCTCTCCTGCCTTCTCTACCTCACAGGAGATGGCTCCTGTCCTCCCCATCTCCCTCCCACCATAACCGCTCACCAAAAATTGACTTGTTTTCTCTGATGCTGCTTTATTGCA…	0.479545454545455
14_CACNA1C	CTCTCCATTCCATCCCTGCG	60.25	TTCACACGAGGCAACATCCC	60.605	926	14	chr12:2394317+2395242	CACNA1C		12	12	2285151	2286076	926	99.8% (1 x 2)	CTCTCCATTCCATCCCTGCGTGTTACCTAGCAGGAATTTCCTCTTCCTTGGGTCAAGCGGGTGGGAAGGGCTCATGATTGCTGACTGAACTCAACCCTTTACACTGGGCATTCAATGTCATCACATTGATAACTTGAAATGGGCAGTAGTGGGAACATTTACACCACAAAAACTGGCATATGCTACACCCAGAGCTTTCCTTCCCCCTCTCCTAAAAGCCAGTTGCTAAAACATTTAACAACATACCACTGGCTGGAACCACTTGTGAAGGTGACGTAGGGCTGCAGGGAGAGCCCAGGTAGTGGAGGAAATGGCAGCCTTCCTTCCTTGCCCATAGCCTGTGCCGGCTACAACTCAGGAGCTTTTGGAACTTAGGAGCTCTGTTCTTAAACTCTCCTT…	0.487041036717063
15_CACNA1C	CTGGCAGGCAGGCTAGAG	59.495	CATCCTGGACCACGTGTG	57.716	881	15	chr12:2401791+2402671	CACNA1C		12	12	2292625	2293505	881	98.9% (1 x 2)	CTGGCAGGCAGGCTAGAGGGACTGAAGGGATGTGCAGAGGTTGGTGGAGAGGGTGAGCAGGGCAGAGACTGAGTGTGTCTAAGGAAAGCTGCCAGCTTTAGGCGGCCTGGGGAGCTTCTAGTTCTCAGCCAATCTCTTCCCTGAATGGGCAGCCTATGGGTGAAGGTCCAAGTGGGGATGTGGCTGTAGTGTCTCTTCCTGCCTTTCTCCCATGCCCTGCGGCACCAGGCCCACACTGGAGTGCTGGTGGGAGCCTGCATGCCTGGTTAAAGGGGCATGCCAGAGAGCTTTCCGTAATTGCGTCCTTTCTTTTTTTTTTTTTCTGGTGTATTTATGAGTTTTAAAAGCCCCTTGGCAACCCAGGAAATTCCATTTCCCTCTGCAGCTCATTTATACCTT…	0.484676503972758
16_CACNA1C	ATCTCGGCTCACCGCAAC	60.13	CACACCCCCTGATGTCCAG	59.7	913	16	chr12:2407529+2408441	CACNA1C	Via Primer-BLAST.	12	1	155887750	155888516	767	97.8% (1 x 1)	ATCTCGGCTCACCGCAACCTCCGCCTCCAGGTTCAAGCAATTCTCCCTGCCTCAGCCTCCCAAGTAGCTGGGATTACAGGCCCGCACCACTACGCCCGGCTAATTTTTGTATTTTTAGTAGAGACGGGGTTTCTCTGGTCTTGAACTCCTGACCTCAGGTGATCCACCCACCTTGGCCTCCCAAAGTGTAGGCCGATAGTTTTTAAACCCTCCCCCTTCTGGTAGTCCCCAGTCTCTATTGTTGCCGTTTCTGTGTCCATAAGTACTCAATGTTTAGCTCCCTCTTACTAGTAAGAACATGCAGTACTTGGTTTTCTGTTCCTGTGCTTAGGATAATGGCCTCTCATTCATTTATTAGTCAACAAATATTTATTTGAGTGTCTACTATGTGCCAGGCAC…	0.475880052151239
16_CACNA1C	ATCTCGGCTCACCGCAAC	60.13	CACACCCCCTGATGTCCAG	59.7	913	16	chr12:2407529+2408441	CACNA1C	Via Primer-BLAST.	12	2	43213903	43214231	329	97.8% (1 x 1)	ATCTCGGCTCACCGCAACCTCCGCCTCCCAGGTTCAAGCGATTCTCCTGCCTCAGCCCTCTAGTAGCTGGGATTACAGGCATGCACCACCATGCCCAGCTAATTTTGTATTTTTAATAGGGATGGGGTTTCTCCATGTTGGTCAGGCTGGTCTTTTTTTTTTTTTTTTTTTGAGACAGGTTCTGGCCCACATGGCAAAACCCCGTCTCTACTGAAATACAAAAAATTAGCCGGGCATGATGGCGGGCGTCTGTAATCCCAGCTACTCGCGAGGCTCAGACAGGAGAATCACTTGAACCTGGGAGGCGGAGGTTGCGGTGAGCCGAGATC	0.513677811550152
16_CACNA1C	ATCTCGGCTCACCGCAAC	60.13	CACACCCCCTGATGTCCAG	59.7	913	16	chr12:2407529+2408441	CACNA1C	Via Primer-BLAST.	12	3	57528093	57528680	588	97.8% (1 x 1)	ATCTCGGCTCACCGCAACCTCCGCCTCCTGGGTTCAAGCGATTCTCCTGCCTCAGCCTCTTGAGTAGCTGGGATTACAGGCATGCACCACCATGCCTGGTTAATTTTGTATTTTTAGTAGAGACAGGGTTTCTCCATGTTGGTCAGGCTGGTCTCGAACTCCTGACCTCAGGTGATCCACCCACCTTGGCCTCCCAAAGTGCTGGGATTACAGGCGTGAGCCACTGCACCCGGCCTAGGATTGTTTTTTCTATATCTGTGAAGAATGTCATTGGTATTTTGATAGAGATTGCATTGAATCTGTAGATATTTGGGGGGTAGTACAGACACTTTAACAATATTAATTCTGCTGGGCCAGGCGCGGTGGCTCACGCCTATAATCCCAGCCCTTTGGGAGGCC…	0.523809523809524
16_CACNA1C	ATCTCGGCTCACCGCAAC	60.13	CACACCCCCTGATGTCCAG	59.7	913	16	chr12:2407529+2408441	CACNA1C	Via Primer-BLAST.	12	4	157517544	157518006	463	97.8% (1 x 1)	ATCTCGGCTCACCGCAACCTCCAGCTCCTGGGTTCAAGCAATTTTTCTGCCTCAGCCTCCCAGGTAGGTGGGATGACAGGTAAGCACCACCATGCTGGGCTAATTTGTGTATTTTTACTAGAGACGGAGTTTCACTGTGTTAGCCAGGCTGGTCTTGAACTCCTGACCTTGTGATCCACCTGTCTCAGACTCCCAAAGTGCTGGGATTACAGGCATGAGCCAGGACGTATAATAATATTTGGTCGGGTGTGGTGGCTGATGCCTGTGGGAGCCGAGGTGGGCGAATCACCTGAGGTCAGGAGTTTGAGACCAGCCTGACCAACATGGAGAAATCCCATCTCTACTAAAAGTACAAAATTAGCCAGATGTGTGGTGGTGCATGCCTGTAATCCCAGCTAC…	0.520518358531317
16_CACNA1C	ATCTCGGCTCACCGCAAC	60.13	CACACCCCCTGATGTCCAG	59.7	913	16	chr12:2407529+2408441	CACNA1C	Via Primer-BLAST.	12	6	27555557	27556060	504	97.8% (1 x 1)	ATCTCGGCTCACCGCAACCTCCGTCTCCCGGGTTTAAGCGATTCTCCTGCCTCAGCCTCCGGAGTAGCTGAGATTACAGCCATGCGCCACCACGCCCCGCTAATTTTGTATTTTTAGTAGAGACAGGGTTTCTCTATGTTGATCAGGCTGGTCGCGAACTCCCAACTTCAGGTGATCCGCCCGCCTGGGCCTCCCAAATTGTTCGGATTAGAGGCGTGAGCCACCGCGCCCGGTCTTAATCTTAATTAATTAGAAAAATTTGCTGGGCGCGGTGGCTCACGCCTGTAATCCCACCATTGTGGGAGGCTGAGGTGGGCGAATCACCTGAGGACGGGAGTTCGAGAACAGCCTGACCAACAAGGAGAAACCCCATCTCTACTAAAAATACAAAAAAAATTA…	0.545634920634921
16_CACNA1C	ATCTCGGCTCACCGCAAC	60.13	CACACCCCCTGATGTCCAG	59.7	913	16	chr12:2407529+2408441	CACNA1C	Via Primer-BLAST.	12	6	35537234	35538691	1458	97.8% (1 x 1)	ATCTCGGCTCACCGCAACCTCCGCCTCCCGGATTCAAGTAATTCTCCTGCCTCAGCCTCCCAAGTAGCTGGGATTATAGGCATGCGCCACCACGCCTGGCTAATTTTGTATTTTTAATAGAGACGGGATTTCTCCATGTTGGTCAGGCTGGTCTCAAACTCCCAACCTCAGGTGATCCGCCCACCTCAGCCTCCCAAAGTGCTGGGAATACAGGCTGAGCCACCGCTCCCGGCCAGGGCTCCCACATTTCTATAGGAAAGCTGGAGTTCTGAAGTAGCAAAGGCCAAGTGTCCACATTTAGTCCCCAAAGACAGACATGTTGGACATTGGAGGATGGTAATCAGGATGGTTTGACCTGTACAGATTTGATGGTGGCTAATTAATCCTAGTGTCCCTAGG…	0.486968449931413
16_CACNA1C	ATCTCGGCTCACCGCAAC	60.13	CACACCCCCTGATGTCCAG	59.7	913	16	chr12:2407529+2408441	CACNA1C	Via Primer-BLAST.	12	9	36573570	36574557	988	97.8% (1 x 1)	ATCTCGGCTCACCGCAACCTCCGCCTCCCAAGTTCAAGCGATTCTTCTGCCTCAGCCTCCCGAGTAGCTGAGCTTACAGACATCCGCCACCACGCCCGGCTCATTTTTTGTATTTTTAGTAGAGACGGGGTTTCACCACGTTGGCCAGGCTGGTCTCCAGCTCGTGTCCTCAGGTGATCCGCCCGCCTTGGCCTCCCAGAGTGCTGGGATTACAGGCGTGAGCCACCACGCCCGGCCTAAAAGGGGAATTTTCACCGAATGCTGTATCAGTAATAGGAGCAGCAGGATTGCTCCCACCAAGAAACCTGGTGTAGGGTTGTGGGAGCTGGAAAGGGTAGACTCAGGGAAGGCTGCCCAAGAGAGGAATCAGGTCCCTAGCACTTAGGACGGGTAATTACC…	0.521255060728745
16_CACNA1C	ATCTCGGCTCACCGCAAC	60.13	CACACCCCCTGATGTCCAG	59.7	913	16	chr12:2407529+2408441	CACNA1C	Via Primer-BLAST.	12	9	37973288	37974210	923	97.8% (1 x 1)	ATCTCGGCTCACCGCAACCTCCACCTCCCAGGTTCAAGCGATTCTCCTGCCTCGGCCTCCTGAGTAGCTGAGATTACAGTCATGTGCCACCACGCCCAGCTAATTTTGTATTTTTAGTAGAGATAGGGTTTCTCCATGTTGGTCAGGCTGGTCTCGAACTCCCAACCTCAGGTGATCCACCCGCCTCGGCCTCCCAAAGTGCCAGGACTACAGGCGTGAGCCACCGCGCCCGGCCTTCTGAATTTTTTATCATAACTTTGGCACAGATTCTAAGGAGTGGGATTAGAATAAAAAGGTGTTAGCTTAGATTTATGACTTATGATGCACATGCCCAAGATCACTTTTCAAAAGGGCTGTGGGAGAGGAGTTCTAGAATTGTGACAGATACCCAGATTCTAG…	0.529794149512459
16_CACNA1C	ATCTCGGCTCACCGCAAC	60.13	CACACCCCCTGATGTCCAG	59.7	913	16	chr12:2407529+2408441	CACNA1C	Via Primer-BLAST.	12	12	2298363	2299275	913	98.7% (1 x 2)	ATCTCGGCTCACCGCAACCTCTGCCTCCAGGATTCAAGCGATTCTTGTGCCTTAGCCTCCCAAGTAGCTGGGATTACAGGCACGCACCACCACACTCAGCTAATTTTTGTATTTTTAGTAGAGACAGGATTTTACCATGTTGGCCAAGATGGTCTCCATCTCCTGACCTTGTGATCTGCCCGCCTCGGCCTCCCAGAGTGCTGGGATTACAGGCATGAGCCACCGTGCCTGGCCAGGTGACAGGGTCTTAACATGGAGGCTTTCAGGACAGATTTGGTTTATGTCTGCCCTGGCATTCAGAAGGTGACAAGTGGAGCCCGGAAGGCTTTCGGACTAACTTCTGTAGGCCCGTGCCCTCTATGGCCGCAGAATTGGCTTCTTGTTCCATGTTGCTGCTAG…	0.507119386637459
16_CACNA1C	ATCTCGGCTCACCGCAAC	60.13	CACACCCCCTGATGTCCAG	59.7	913	16	chr12:2407529+2408441	CACNA1C	Via Primer-BLAST.	12	17	5244741	5245295	555	97.8% (1 x 1)	ATCTCGGCTCACCGCAACCTCTGCCTCCCGGGTTCAAGCGATTCTCCTGCCTCGGCCTTCCGAGTAGCTGGGTCCCCACCACCATGCCCAGCCATTTGTATTTTTAGTAGAGATGGGGTTTCACTATGTTGGCCAGGCTGGTCTCCAACTCCTGACCTCCTGATCCACCTGCCTTGGCCTCCCAAAGTCCTGGGATTACAGGTGTGAGCCACTGCACCCAGCCCAGAACTTTTTCATCTTCCTAAAGTGAAACACTGTAACCATTGTCCACTCTCTCCTGCCCCTGGTAGCAATTCTTTCTTGAAAAAGGCTAAAGTAGGCCAGGCGCGGTGGCTCATGCCTGTAATCCCAGCATTTTGGGAGGCGGAGGCGGGTGGATCACCTGAGGTCGGGAGTTCA…	0.547747747747748
16_CACNA1C	ATCTCGGCTCACCGCAAC	60.13	CACACCCCCTGATGTCCAG	59.7	913	16	chr12:2407529+2408441	CACNA1C	Via Primer-BLAST.	12	17	60892377	60892876	500	97.8% (1 x 1)	ATCTCGGCTCACCGCAACCTCTGCCTCCTGGATTCAAGTGATTCTGTCTCAGCCTCCCAAGTAGCTGGGAGTACAGACATGCGCCACCATGCCTGGCTAATTTTGTATTTTTAGTAGAGATGGGGTTTCTCCATGTTGATCAGGCTGGTCTTGAACTCCCAATTTCAGGTCATCTGCCCGCCTCGGCCTCCCAGAGTGCTGGGATTATAGGCATGAGCCCCAGCGTCCGGCCGTTTTTGGCTTTTTAAGAATAGCCGTTTTCGGCCCGGCATGGTGGCTCATGCCTATAATCCCAGCACTTTGAGAGGCCGAGGTGGGTGGATCACGTGAGGCCAGGAGTTCGAGACCAGCCTGGCCAACATAGTGAAACCCTGTCTCTACTAAAAATACAAAAAATTA…	0.544
16_CACNA1C	ATCTCGGCTCACCGCAAC	60.13	CACACCCCCTGATGTCCAG	59.7	913	16	chr12:2407529+2408441	CACNA1C	Via Primer-BLAST.	12	19	15341614	15342942	1329	97.8% (1 x 1)	ATCTCGGCTCACCGCAACCTCTGCCTCCCGGGTTCAAGCAATTCTCCTACCTCATCTTCCCAAGTAGCTGGGATTACAGGCATGCGCTATCACACCCGGCTAATTTTTTATTTTTAGTAGAGATGGGGTTTCTCCATGTTGGCCAGGCTGGTCTTGAACTCCTGAGCACAGGTGATCGCCCACCTCGGCCTCCCAAAGTGCTGGGATTACAGGCATGAGCCACCGCGCCCGGCTGTCAGCCTTTTAAAAAATATAAAAACCATTCCTCACTGGAAGGCTGTTCAAAAACGGTGGCTGAGATTTGTCTTGTAGGCCATATAGTTTGCTCGTCCCAGTTCTAGACTCTCAAGCCTAGAGAAGCAGAAATTTCTTTACATGCATCTTTTTTATTTGTTTGTT…	0.500376222723853
17_CACNA1C	TCTGAAGAGGGAAACAACAAGGT	59.798	ATGGGTCAGCTTGGTTCCC	59.616	917	17	chr12:2419760+2420676	CACNA1C		12	12	2310594	2311510	917	99.6% (1 x 2)	TCTGAAGAGGGAAACAACAAGGTAGGTAACTGAAAGTCTGGAGTTGTTTCTATTTAGTTGTTCCTAAAGGCAGGGGGATGGACTAGAGGAAACCTGCAAGGGCTTTCGACTCACAGGGTTCTTTCATTCTGTGGGCACCAGTTCTCTGGGCATGAGAGATGCCAAGGAGCTGGTGTGTTTTGGAGAGCTCATGCTCTGAAGCACATCAGAAGAACCAATGGTTGCCGCAAGACCCCCTTCCTAATGCAGATGGAGTTTTCTGTGAATCCCGGAAGGTGCACTTGGGTGGGAGGGAGTTGAGGGGTAGAAAAAGGAAGACAGCCCCTACGTTCAGCAGAACCCAGGGCTGATGTCTGCAACAGCATAAAGTGCCTTCTAGAGTCTAATCCTGGTCATCCG…	0.482006543075245
18_CACNA1C	AGAACTCTGCTATGTTATTCCTCA	57.202	ACCTACGGTGATACCTCCAT	57.23	915	18	chr12:2517717+2518631	CACNA1C		12	12	2408551	2409465	915	95.7% (1 x 2)	AGAACTCTGCTATGTTATTCCTCAGGTCCTGGGGTTCCCTTCTGGTCTACTGCTTCTCTCCTCTTTTAGAGTCTTTTTATGTTTCTTTTACATATAACGTACAGGGATTTTGGTTGCACTTAGTAGGGAAAGATGTGTCTACTCCATCTTTCTGGAAGCAGAAGTCTCCAGGCCACTTTATGTGAAGAGTTTTGTCCACATTTCATTTCTTTTTGCTCACTAGTGAAGTCTTATTCATTTCAATTTAGTATATAAAACTTATAGCTGAAAAATATATTTCATTTTCATGGAAAAGGACTCCTACTTCTGAAACCTTGCATTGATATTTCTAGACATTTCCAGGGCACCAGTCATAACATCAAGTAAGAAGCCTATTGCCATCCTCCGTGACATCCCCTT…	0.419672131147541
19_CACNA1C	GTTAGGTGCCTTGATTGCGG	59.548	ACATGCACAGGGTCCAGATG	60.035	922	19	chr12:2518816+2519737	CACNA1C		12	12	2409650	2410571	922	99.7% (1 x 2)	GTTAGGTGCCTTGATTGCGGGTCCTCTTTCTGTCTGCCACTTCCTCGCAGTCCCCCCCAAACCCCTTATAGTCCTCCCTGAAGCTGCAGTGTTCACCCTAGCAAGGCAAGTACCTGTGCTCCCTTGGTGCCTCCCATGGCACTTGTGCCAAATGCAAGAAAGAGGAGCCAACGCAGGGCCCGCTGCCCAGCAGGGGAGGTGGAGGCAACGCAGGTGTGATGTACACAGTCCCTCTCAGGTCAGGGAGGAGAGGGAAGTAGGGCTAGGAGGAAAATGGGGCAGGAGAGGAAGGGAGAGCACAAGGGAGAACTAGTGGAAGGGAGAGGTGGATGAGCAGGACAGCTCGGAGAGACAGGAACGCAAACAGAGGAGAATTTTCGCTCGGGGTGGGAATGAATC…	0.545553145336226
20_CACNA1C	GAAGGGCCTAGATCAGCGC	60.301	GACAGCTCAGAGGGACAGC	59.782	921	20	chr12:2520211+2521131	CACNA1C		12	12	2411045	2411965	921	99.8% (1 x 2)	GAAGGGCCTAGATCAGCGCAAATCTCACCATCATGATGTCCCCAACTGCTCCGCCCGTGTATGTGTTGGGTATTTCCAACTGTCCCCAGCAAAGCCTGCCTCCTCCCCACCTCCTGAGCCCTGTGGGGTATCAGGAGCCTCACCACTCGAGCGGGGAAGAAGGACAGAGCAGCAGCCTCAGCCCACAGCAGCCCTGCGGTGGAGAGCTGCAATGAAGGCAGGCCTTATATAGACAGGAAAAGCAGGGTGACTGGAAGTACTCAGTCACGGGCAGAGTCAGAGCCCTAGGACCTTTAGGGACAAGGCAGGTGAAAGACCTGTTAGAATTAGGGAGTGAGGGGCTGGAGGTGGGGGGTACACTGGAATGTTACGGTTCTATTTTTCGCTGAGTGAAAACCA…	0.56243213897937
21_CACNA1C	TTAGCTCGTTACCCCTGTGG	60.12	GGCCCAAGAACCAGCTTAT	59.14	912	21	chr12:2521266+2522177	CACNA1C	Via online Primer3.	12	12	2412100	2413011	912	99.4% (1 x 2)	TTAGCTCGTTACCCCTGTGGCTGTGGAGGTCCCTCAGGAAAAGCAGCTCCCCAGGCAGGGGTCCCTTCCTTCCCTCACCACAGCCCCAGCCCCACTGCAGGACGCCCAGGATACCACAAAGGCCCCCCACAATCCCTGCTGGCAAGGCCGTCCTTCCACAGCACACACCGGAGAGGCCTTCTCTATGTGCCTCGATAACCTCAGACCTGGCTTCTTAGAGAAACGGGTCAGGCAGTGACGTTTGTGGCTTTGTACTCCATTAAGTGCTCTTCAGGCCCTCCCTGGATCTTTTGAGATCATGGGGATAAGGGGCGGTGCCCAGCAGACCTGGCTGCTTAAACCATGGTCTCCAGGAGATAAGAGATGCATAAGCTCCAGGAGCCCAGCAGTGAGACAGGC…	0.473684210526316
22_CACNA1C	TCCACGGAGAAGGCCCTC	60.68	AGAGGTAGAGGCTGCAGTCA	59.96	902	22	chr12:2522926+2523827	CACNA1C	Via online Primer3.	12	12	2413760	2414661	902	99.8% (1 x 2)	TCCACGGAGAAGGCCCTCCACTGCCATTTAGGCCATTGGAACTCTTCTGTCCTTTAAGGCCCAGCTCAAATGCCTCCCGTTCCTGAGCTAGAGGTGAGCTTCCCTTCCTCTTCCCCAGGCACTTCTTTGTTAGGGAACAGGAGTTTTCCTCTCCTGCTAGACTATAAGCTCCTTAAAAGCTGAGACCATCTGATGAGTTTTTAAATAACCCCCCACCCAAGGCTGCCCCCAAAACTCAAATCAGTGCCTTGCATAGCAGGGATGCAACATTAGGCAGTGCAGAGAGAGTGGGATTCAGAGTAAGACTGGCCCAAGTCCTATCCCGTCTCCGTTATTTGCTGGCCGTGGGACCCGGGATAAGTGGCGTAATCTCTGAGTTTTAGTTGCCTTATCTGTAAG…	0.48780487804878
23_Epilepsy	GAGACCATCTTCAGGTGTCCC	59.792	CCCTGTTTTGGCCCCAGAAT	60.55	912	23	chr5:3276607+3277518	Epilepsy	Via online Primer3.	5	5	3276493	3277404	912	99.8% (1 x 2)	GAGACCATCTTCAGGTGTCCCAGGCCTGCGTCTGCCTCAGTGTCCGTGCCCTGCCAAGTCTTGAGCTGAGAGTAGCCCGGGGTTAGGACGGCCTCAGCAGCAAGACAGTGGTGGGGTTCAGACTTTGGTACCAAGAGCCCCGGGCAGCTTGACCCCACCCTTGGATCCTGCATGGAGCCTCCTCACCATGCCACAGCGTCATGTTTGCTGGGCTTGGTAGAGTGTTGGGCACACGTGGACTTCCTGAGATGGTGCAGTGCAGAAGCGGGGGTGGGACCCACACGGTTCTTACGCGGCCCTGCAGGGCAACAGGGGAAGCTTCCTCCCATCTTGAAGTTCCTTCCTTTCCCTGATCTGACTTTTTTGTTGGGCAAAGGCCAAGGCCTTCCTCCTGCTATC…	0.585526315789474
24_Epilepsy	GAGAAGAGCTCTCGACGGAAA	59.531	TATGTAAACAAAGCTGGGATCTTCG	59.415	915	24	chr16:4103420+4104334	Epilepsy		16	16	4053419	4054333	915	99.8% (1 x 2)	GAGAAGAGCTCTCGACGGAAACAGCAGTTGGCAGTGTCCCCAGAGCACTTGCCCTTCCTCTGGAGCGCTTCACGTGCGAGCCCGCCGTCTATTTATAACAGTTGGGCACTTGTCGCCACAATGGCTGATTGTGTGGCCCAGCTGTCTGTGTCTATCAAGAAGGGCAGGAGTGGACAGCCTGCACTTTGATGTTTCCCTTTTTTGGAGACTGAAAATAACATTTTTAAAAAACTGCCAACCGGCAAGGTCACAAAATATTTTTGGATGGCACGGGGACCCGATTGCAAAGCTGTGGTTCACATCAGATGCGGAGGCCTGGGACGCAGCCAGTGAGCCCCATTGCACAATATCCTGCTCATGCCAACTTCAAAAGTTATTTGCCTCGGAGAGCTCCCAGAC…	0.496174863387978
25_Epilepsy	CCCTAGGGTCCCTGATCAGA	59.437	GAGGGAAGACATAGGGAGAAGAC	59.36	918	25	chr16:8517292+8518209	Epilepsy		16	16	8467290	8468207	918	99.8% (1 x 2)	CCCTAGGGTCCCTGATCAGAGTCATCAGGGGGATAGATACCAGCAGTGGATTCAGGCTACCCTAATTCACTCCACCTGAGGCTTAGAAAGGTTGTCACTTAACCCAGCTCTCATTGCTGGCAAATGGCAGATGAGATTTTAATCCAAAGACATGATCTTTTCATTGTGCTGCAATACTTCCCTGAATGTTAATCTTACTGAATGAATCTGTAAATGAATTAATGAACGAACGAGTGAAGAAACTATTCAGTCGCACATGTAGTGGCCTCCAGTGCTTCTGGAGATGTTTTGGGGTCTGGAATAATACAGGAAGGTTATCTCATTCACCCATGTGATCCAGAGCTTGGTGGAAATGCAACCAGCATTCTCTGTGAGGATCCAATCTCTTCCAACGCCGAG…	0.44880174291939
26_Epilepsy	TGCACACACTCAGGTCTTGA	59.17	TGCATGCTCTTTCTCTGTCAAAA	59.115	930	26	chr9:10259799+10260728	Epilepsy		9	9	10259799	10260728	930	99.6% (1 x 2)	TGCACACACTCAGGTCTTGATTTCCAAAGTCCCAGGCAGAGAATCTACTGTGTGACGTCACACTTTTGAAGATGGCCTCCTGCATGAACTCCCTCTGTCATACTGACCCCACCAGAGTGGATATGCACAAGCATCAGGCCCGTTTCAACCACACTCCCTTTCACAGTGGAGCTGAGTTCATCTCAGGTTCTGAGACAGTCCACACCACTCTCTGCCTCCGGCTAGTCCTTTGTGGTGGTTGTATCTGCAGGCCTCATTTTGAAGCTCCCTACTACACTAAAACAATCTTAGGATATATTTATACTAAAAAAAATTGTTTATCTGAAATCAACATTTAACCATGTTCCCTGTGGTATTATGTGTTAAATGTGGAAACCGTAAATGTGACTAGACTGTTTC…	0.40752688172043
27_Epilepsy	TCATTTACCTGACTACCCCACA	58.477	TGTTGTTGCTGTTCAAGAAAGATG	58.658	880	27	chr9:10504801+10505680	Epilepsy		9	9	10504801	10505680	880	99.5% (1 x 2)	TCATTTACCTGACTACCCCACATGCCTTCTCCCTGCCAAGATGAAATTATCTCTTACTATTATATTAGGAGATGGATGTGCACCTGTCTGTTAATGTTAACAGAGGAAAGGGGTTGCTGAGTGTCTATAAAGCTGACTTGTAACACTGGTGTATCTGCTACAACATTGGCTCTACATACATATCAAGCAATTTTGAACTGCTCAAACACCATGCCAATCTTAATGCAAGAGCTGTCATAGCCAGAGATTCTAGGATACCATCAGAAATTGCAGTCTTGCAAAAGAAAAAAGGCAAAACCTTAAAGTGAACAGGCTTCAAGTTCGGGTAGCAAGTAATATGTCTGCTACAAGGATATACATGTCCTCCACGCTGTGATTTCTCAATATGATTAAGGTAGT…	0.396590909090909
28_Epilepsy	AAACACAGGTTTTTCTGGTTGACA	59.718	ATTGGACACTTTGCCAGAGGT	59.854	900	28	chr3:21718791+21719690	Epilepsy		3	3	21677299	21678198	900	99.8% (1 x 2)	AAACACAGGTTTTTCTGGTTGACATCATCATGTTCTCACCCTCTTGTGAATTGCAGCCTAAATATACAAATCTGGAGCTTGGCATGAGGCACATATACATCTTGACTTGTACAACTAATTCCCATCCATTTTGCTCAACTCAGGCTGAGCCAGAATTAACTAACTAATGCAGAATGCCACAGAAATTGCATCTGATTTTTCTTTGGCTGCAGATTCACTAGAAGCTCATGTTCTTACTATTCCTTAGAATTTGGGAGTCTAGAAAAGCACAGGCCTAAATAAATTTCTAAGAGAGAAATTTAATTTAACAATTAGAGTAAAATATTCTGGTAATGAAATTGTATTCTGCTAGTGTGTGGGGGATCATATAGACTGAATTATTTAAAGCAGTCCTAATTT…	0.347777777777778
29_Epilepsy	TGTGACAACACCTTGTACGGTT	60.35	ATCCTGGGTGTCCTGAGTGTT	60.77	879	29	chr15:30897910+30898788	Epilepsy	Via Primer-BLAST.	15	15	30605707	30606585	879	99.9% (1 x 2)	TGTGACAACACCTTGTACGGTTGTTGGTGTCATTAAATCAGATGGTGTGTAAGTGTATTTTGTAAAAACTGTAAAGGAGGATGTGGCTGCAGGGGCTGACGGTTCTCATGAGTATTACTGCTCTTCTTTCCAACAGTTAAAAGAATATTGGCAGAAAAACAGCCCTAGAGTTCCAGCAGGAGCGAACAGGAACAGGAAAACAAATGGCAGTGTCCCTGAGAAAGCCACTTCTGGTGGTTGCCAGCCACCTGGGGATGTGAGTCTTGGCTGACCAGGCTTCTGGGGACAGGGGGCCCAAGGGGCAATAGAGGGTAATTCTTAAGATTGTGGATGGACTGCTGGGTACTGGTTAAGAATTCTGGCTTTAGCCGGGTGTGGTGGCCCACGCCTGTAATCCTA…	0.474402730375427
30_Epilepsy	GCTAAATTGAGCTCTTAGGAAACA	57.256	TCCTTCTACAGCCAGATGATAGA	57.933	918	30	chr4:31150895+31151812	Epilepsy		4	4	31149273	31150190	918	98.9% (1 x 2)	GCTAAATTGAGCTCTTAGGAAACAGAGTGAATAGGGACTGAACTTATGTTTGTTTATTTTCTCTTATCTTTATCCTTTACTCTAATACTTGTTTATAAACTGCATGAAGGAAGGTGATTAGCCAAGATAATATAAATTTTCTAAGCTGCAGGGAGTGAGGAATGGCTATGAATGTAAAATGTGGAAAGCTATTTATGCTTTCCTTTAACCCTTATTTTATTTTTTCCTGTTGTGTTTGGGTTAAATGTAAATTGTATTCATTTGTTGATTTTAATATGTGTGACCCACACAGAAATAATTTTATTTATTGAACCTCCTGTGGGAAGATGCTTAATAGTTTATAAATATAAAATTGTCCCCAACACTACCAGATGATGCTAAAAGATTTATAGTTTATCC…	0.282135076252723
31_Epilepsy	TGATGGATGGGAAAGTGCCT	58.998	GGGTGGGGAACAGACAGTG	59.927	917	31	chr1:34750471+34751387	Epilepsy		1	1	34284870	34285786	917	99.5% (1 x 2)	TGATGGATGGGAAAGTGCCTTGTTTGTCAATTGTAAAATTCTACCCAAGCACAAAAGATTATTGCTCCCACATAGTGTAATATGAAGACCACCGATAGAGAGCACTTCTGCCTAGAATGCTACTTCAACAAGTTAGGAGAAGGTACAAGATGAATGGCCTTGGGTCGGTGGACTCCAATTAGCAGACTGGAGTAGGCGCAGGAATCCACAGACCCCTTAAGCATACAGGGATGACTGAGGGTTTCAAATGGGGTTTTGATGGCGGTGTTAGCTCCAGTCTGGAGGAATCATGAAGGGGAAAGGTGGGTAGAGGTCAGGTGGGGCATTTTCCAGGAAGGGAGGCTTATGGGGAGTGCCACATGGGATGAGTGAGTGGGAGGAGAGGAAGGCTTCTGCAGA…	0.455834242093784
32_Epilepsy	TCCTGGCTCAAGTGATCTGC	59.75	GCAAGGGCCGAAGAGAGTAA	59.75	917	32	chr17:46122546+46123462	Epilepsy	Via Primer-BLAST.	17	17	48045184	48046100	917	99.8% (1 x 2)	TCCTGGCTCAAGTGATCTGCCCACCTGGGCCTCTCGAAGTGCTGGGGTTACAGGTGTGAGCCACTGTGCCTGGCCTTAGAGACATTTTTAGAGGAAAGATAATGGACAACCAGAATGGCAGAAAGCCTGGGTTTCCCTTTTAGGGAAAAAGCAATTTCACTGTTCCAGAAGAAATCAGAGCCCCAGCCAGCCTGCCCTCCCACAGCCCCTTCTCTGAGGATTCCTGGCATGTGTCATCCTCCAGGGATGACTGCAGGATGGATGTGGCTGTTGGCGGCAGCAGCAGCTTTTCCTACCAGGGAAGCTGGGTCGGTAGACACTACACTGCTATTCCTGGGGTGGGGGTGGGGATTTCCGTGTATGTTTTATAGTTAGCTGGCCCCAAATCCGTGTGCTTTA…	0.53217011995638
33_Epilepsy	CTCTCAAGGCTGCTAGCTCT	58.886	TCCCTACTCTCTCTCCCCT	57.216	893	33	chr4:46239828+46240720	Epilepsy		4	4	46237811	46238703	893	99.1% (1 x 2)	CTCTCAAGGCTGCTAGCTCTACAAACACATTTGAAAAGTAAGCTTGGAACAAAGGCAGCCAGTCCTTTTGCTGACAAGATGTGCAAAAATGTGACACTCATGGAGAAGTGTTTCCTAAAACATCTATCCCTGGTTTATATACCATCTTGGCTTCTGGTGAATTTTTCTTTGAATACATGACACTTTAATGGCTTACCCGACCTGACAGACAGAAGCTGAAATTATATCTGATCAGTTTGTCTTACACAGCATTTAATTAAGACTATTATCAGTAGGATCGCTATAAACATTGTGCCCATTTCATAAATGTGCCATTTCATAAATGGGCACAATGTTTATAGAAATCTTATTGATAGTAGCCTTATGAAATGATTTTAAAATTCAGTGCTTGGATAGGAT…	0.337066069428891
34_Epilepsy	TCCGAGTCCAGTGGAAGTCC	60.899	CACTAAAACCCTGCTTTTGCCT	59.635	907	34	chr6:52835433+52836339	Epilepsy		6	6	52970635	52971541	907	99.8% (1 x 2)	TCCGAGTCCAGTGGAAGTCCAGCCTTCAGCTGCTGGGGTCTCCCGTGTCTTCCTTAATTCATACAACCACTTGATCATGGGTGTGTTGCACTCCACCACCAACATGCCACAGGGGACATGCTCCTGGGCCCGCTCCCCAGCAGTAGCCAAACTGAGGTGGGAGCAGCTTCCCTTGGAGTTGCCCCCACCCAGCACTGGGCCCAGCCAGGGACATGATGTCCAAGTTGGCAAGGCCCCCCTTTGATTCCCAAATTTAACAACGTGCCAGATGTGTGGGTTCCAGCCCTGAGGCAGGGTCACAAAGAGATGTCAGTTTCCTCAACTATAAAATGAGGAATTGGTTTAGAATCAGATCGTCTCCTTAGTTTCTTCCAGTTTTAACCACCCCCCCCCACTGCC…	0.501653803748622
35_Epilepsy	GGTCATAGACTCAGTGAAGGTGA	59.236	ACTGGGCATTTTTAATACAGTTTGA	57.703	900	35	chr2:57933700+57934599	Epilepsy		2	2	57706565	57707464	900	99.5% (1 x 2)	GGTCATAGACTCAGTGAAGGTGAACAATTCTCAGACTTGGGAATTTTGAGACCAGCAGGCAGGTCCTATATCAGCACATTGGCTGTAGCCATTGGTCACAGGGAATAAAGCAAGCATGAGGGTTTCCCGAGTCCAGAGGCTCTTGTAATTGCTCTAGAGCTATGTGCTTCATAGGGTGAGTGTGACATCTGAGAGATGTCAGGTATGGTGACAACAAATTTAGTGGAAGCCTTAGCACAAGGTCATACTGTTTTAGAAGAAGCCTAATCTTAATCCTCTTTAAACTAGCAGTTTGGGTTTCTGGTGAGTTATTTAGCTTGGGCAGAAAACCAGATCCAAACATCTAAGAACTTTTCCTTCTGGTTCAAAGAACTTTTGGATAAAATCACCCTCTAACAA…	0.388888888888889
36_Epilepsy	AACAGCTGGAAGCATTCCCT	59.59	TCTAACAATGTGATGTTCAGATGCC	59.64	900	36	chr2:58059341+58060240	Epilepsy	Via Primer-BLAST.	2	2	57832206	57833105	900	99.6% (1 x 2)	AACAGCTGGAAGCATTCCCTTTGAAAACTGGCACAAGACAGGGATGCCCTCTCTCACCACTCCTATTCAACATAGTATTGGAAGTTCTGGCCAGGGCAGTCAGGCAAGAGAAAGAAATAAAGAGTATTCAAATAGGAAGACAGGACGTCAAATTATCTCTGTTTGCAGATGACATGATTGTATATTTAGAAAACCCCATTTTCTCAGCCAAAAATCTCCTTTAAGTGGATAAGCAACTTCAGCAAAGTCTCAGGATACAAAATCAATGTGCAAAAATCACAAGCATTCCTATACACCAATAATAGACAAACGTAACCAAATCATGAGTGAACTCCCATTCACAATTGCTGTAAAGAGTATAAAATACCTAGGAATACAACTTACAAGGGATGTGAAGGA…	0.354444444444444
37_Epilepsy	AGAGCACATTTGGAAAGGCA	58	ATTTTTCCCTGACGTCCAGC	58.465	924	37	chr2:58094408+58095331	Epilepsy		2	2	57867273	57868196	924	99% (1 x 2)	AGAGCACATTTGGAAAGGCATATTTGACTACCCATAGAAAATGTTTAAATAAGGATAAAAGGGGTCAAATTTAATATGGAAAACTGAATGACTTACTGAGGAGTTTAGAAATTACTCACAGGCAAATAGGAAATTACTAAAGTTTTCTGATAAGGTAATGGCTATTATTTATTCAAAATATTTATGAGTTTCCGCCTCTACACAGGACAGACACAGTCCATGAACTTCAGGATCCTGGCATCTCCTGGAGGGTCAGAAAAAAGAAATACAATGTAAGATGATATGATTTCTCACAGAGGTTGGCTGAAATCGACTTTAGAAAAATTTGTCTGGAAACAACTAAGGAATGATGGTGAGAGAGAGACAGAAGGCAGAGAGGCTACAGCAGTGAGAAGCAGT…	0.397186147186147
38_Epilepsy	GTGAACTCACAAAGTATTGCCTAA	57.446	GCAATTAGCATTTTGGTGATACAAG	57.774	874	38	chr4:62452451+62453324	Epilepsy		4	4	61586733	61587606	874	98.6% (1 x 2)	GTGAACTCACAAAGTATTGCCTAAAACAATGGACGTATGTTGTAAAATTGAAATAGATTACTTAAATAAGTATATTTAAAGTCAACAATAGTGCAATTTTTCAATGATGATTTTGTTATTAAAAAGAAAGAAGAAAGGAACACTTGCAAGTTTTATTTGAATATCTGACTGTATAAACTGGATGATATTTCTATCTAGTTTTAATCTGACACACTAGGCCAAGAGTTTAATAGAAAATCGACAGTGCCTTTTTTCATTTATAAGAAAAAAAGTGTGATAAAGATTTTAAGAAATAACTGTTTCTGTTAGATTAGAAGAAAAATATTTATAAAGTTACTGAAGAGAAAAATATTCTAGTTTAATTAAAATTATGAATCTTAACTGCTTTATATCTTCGTA…	0.327231121281465
39_Epilepsy	CACACTGAAAGAAACACTCTGGA	58.808	AGCACTGACATTGACTGGCA	59.891	919	39	chr5:66151493+66152411	Epilepsy		5	5	66855665	66856583	919	99.6% (1 x 2)	CACACTGAAAGAAACACTCTGGAATTGGCTACCTGAAGGACTCTTATTGGAAACCAGAACATGTATGCACCACCAGCTCCTGTGCTCATTGGTTGATGGTTGTTCTCCCAGGGGAATGGACTTTGTTTCACTTCTGGGCCTTAGTAGGCTTACATGGTTTTGGAGAATGCCTGGGGCAGAAGAAGAAAAGTGTGTCTGTTTGAGATGGGATACTTGGCCAGGCCTGGTGGCTCATGCCTGTAATCCCAGCACTTTGGGAGGCTGAGTTGGGAGGATCACTTGATCCCAGGAGTTTGAGACCAGTCTGGGCAACATAGCAAGACCCTATCTCTAGAAAAAAATATTAAAAATTAGCCAGGTGTGGTGGTGTGCGCCTGTGGTCCCACTTAGGAGGCTCAG…	0.482045701849837
40_Epilepsy	AGGTTGAGAAGGGTAGTCATGG	59.159	TTCATTGGCAGCCTAGTTTCTG	58.916	870	40	chr6:80564117+80564986	Epilepsy		6	6	79854400	79855269	870	99.6% (1 x 2)	AGGTTGAGAAGGGTAGTCATGGAGTGGGGCAGGGAGGTGAGGATGGTTAATGGGTTAAAAACAATAGAAAGAATAGATAAGACATAGTATTTGATAGCACAACAGCAGGACTATAGTCAATAATAATTTAATTGTACGTTTAACACAAAGGATAAATGCTTGATGGGGTGGATATCCAATATTCCATAACGTGCTTATTTCACATTGCATGCCTGTACCAAAATATCTCATGTACCTCAAAAACATATACACCTACAGAAGTTAAAAATTTAAAAAAATTTTAAAAGACTAATTTAGATGATTATATAACTGACCTGAAATAGAGGAGTTTTATGGATGCTGAGCTAGATATGACCCAAGATATTGTGAGCAAAGACAGTATATGTGGAGAATCAAGCA…	0.385057471264368
41_Epilepsy	ACACATACACACATACATTGGGGA	60.019	TACTTCCACCTGCTCCCTCC	60.618	905	41	chr9:87929683+87930587	Epilepsy		9	9	85314768	85315672	905	99.9% (1 x 2)	ACACATACACACATACATTGGGGATTTTCTGAAAACAAAACTTCAATTGGAAATGATTTCAAAGTAGAGAAAAGAAAAATGTCAGAGAAGTCCTAGCAAAGAAGGAAAGAGAGTTTGTGGGCAAGGCAGACAATTTCAGGCTACGTTTGTATGTAGATGATAGGAGCCTATGTAGAAGAAATCACCACATCAGTGGCTGAAACTAGAGACAGAGGATGCCAAGAGGACTTAAATGGTGCAGACAACAAGCCTGACACATTCTATCTCTTGCACTGCAAATCCATGCATATCCTCCAAGATTACAATATGGTTTTCCATTTTTATGGAACAAGAGGACCTCGCTTCTTTTATGAGAGGAAGGGAAAAGCTTAAAACAGTCAAAGTAGCCATCAAGGTACT…	0.419889502762431
42_Epilepsy	ATGGACTTTACATTAACCCGGGG	60.372	TGAGTGACACATGATGCTGTGA	59.962	915	42	chr11:102594776+102595690	Epilepsy		11	11	102724045	102724959	915	99.8% (1 x 2)	ATGGACTTTACATTAACCCGGGGGTTACAATTAAGAGATAACCTCTTAATAATAATAATGCTTTCTCCAAACTATAATGCTAAGAAAACTGTGCATGAGAGATTTGTGACAGAATTCCCTTGTGTTTCTTAAAAATTTGGGTTCACTTTCAGACTGTGAAACAATGGAAAAAAACTATTGGTTCTGCTTTTATAATGCTTCCAAGAGTTTATAAACAGTCCACAATCTGATGCTGGGAAATATGATTTTACTGTGTACTGATTTCTAGTTCATTGTAATCTACCATCCTCACATTATTTTCTATATCTGGAATTTTTGGCGGCAAAGAAAATGCCTGTATGGAAGCACCAGACATATAGTAACTTGATTGCAGATATCCTGGAAGGAAAAACCTTAGGT…	0.372677595628415
43_Epilepsy	CCATTATCAACATACTACCTCTCGT	58.02	GCAGTGAGCTGTTGCACTC	59.43	902	43	chr5:114268131+114269032	Epilepsy	Via Primer-BLAST.	5	5	114932434	114933335	902	99.3% (1 x 2)	CCATTATCAACATACTACCTCTCGTTACAATTTCAGCCACCTTCCCTTTACCATAACAACTTGCATCCCATGAAAAGTAGAGCTACTAACAGCAGAAAGATGAGCAGTCCCAATTCAGATATGTCTACCTTCTTTTTGAAAGCTCTCTCAGCCTACCTAAGTGTTTTAAAATAATTTTATCTTTTATTTTAGATGCAGGGGTACATGTGCAGTTTTGTTACATGAGTATATTTTATGATGCTGAGGTTTGGAGTACAGATCCCAACACCCAGGTAGTGAGCATAATACCCAATTGGTAGTTTTTCAACCCATGCTCCTCTCTTTCCCTCCCCCATCTAGAAGTCCACAGTGTCTATGAAATGCATTTTCAAAACGTATATGACCCAGTTATCACTACGA…	0.342572062084257
44_Epilepsy	AATTTAGAGGGGATTAAATTGCCAA	57.252	GGGACCACATAAGAAGAGGC	57.666	882	44	chr2:145359681+145360562	Epilepsy		2	2	144602114	144602995	882	99.1% (1 x 2)	AATTTAGAGGGGATTAAATTGCCAATATAGGAAACATGTCTCTTTAGGTGATTCTCCCCAGGGTGATGCACCATTTTTTAGAGATAAACCGCTGGAAGGTGCAGCTGAAGATGGAACTTCATAGGAAGTTAGATAGAACTTTACAGAAATGATGACCCATTCACCATAGCAGATCTACTCTTGGGAAAGGTGAGACGTGAGTGGTATTCTCAGAACTGCCAGAAAAATCTTGTCATAGATTGTGTAGATCTGTCTATGGAGACAGACTTCATCTGAGGATCATGATGAACATTGGGTAGCTGCTCAGTTGGCCTGTAAATAATAATGACTTATTAGGTTATTTGACTTTCTTTTTTCTTTTTCTTTTCTTTTCTTTTCTTTTTTTTTTTTAAATTAAAT…	0.388888888888889
45_Epilepsy	CGCCTGAGGTCAGGAGTTT	59.33	GCTACGTGGTATCTGTAGTTTCA	58.01	926	45	chr1:145645145+145646070	Epilepsy	Via Primer-BLAST.	1	1	145789015	145789940	926	98.8% (2 x 1)	CGTGGTATCTGTAGTTTCAGAATAACATGCAGTATACAAGCTGAGGCTCTGAAATGTTCTATGTACTCGCTGACTCAAGTAGTTTTTGTTTTTTTTTTTCTTTTGTGAGACAGGGTCTCACTCTGTCACCCAGGCTGGACTGCAGTGGTATGATCATGGCTCACTGCAGCCTCCATCTCCCAGGCGCAAGAGATCCTCCTGCCTTAGCCTTCAGAGTAGCTAGGACCACAGGCACATGCCAACATACCTAATTTTTTTTATTTTTTGTAGAGGATGAGGTCTTGCTATGTTGCCCAAGCTGATCTCAAACTCCTGAACTGAAGTGATCTTCCTGCCTCAGCCTCCCAAAGTGCTGGAATTACAGGCATAAGCCACTGAGCCCAGCCTAGTTTTTTTTCT…	0.475161987041037
46_Epilepsy	TAAATAGGGTCTGAGATGTGCAGT	59.283	TGGAGGTCTACCAAGCCCAT	60.253	915	46	chr4:150724958+150725872	Epilepsy		4	4	149803806	149804720	915	99.8% (1 x 2)	TAAATAGGGTCTGAGATGTGCAGTTCTTTGAGTTATAATTTTCTGTTATTGTATAAGGGCCCTATTGATGTGGTGGTAAGATGAGAGAGGAAATGTTCTATAATCTTCTGAGGGTCTCAGTCTTTTAATGAGCCTCTGCCCTTGGGTTGTGATCTTCAAAAGTGCTTCTTAGCTTCTCCCTCCTCCCCTTAGGTGATACAAGATGGCTGGAGGGGGCTGGCACTAGATATTTTCCTTCCCCACATGGAAGGCTATAGGAGGCTGGAGTTGAGTATTTCCCTTTCCTCAAGTTGGTTAGGCTTTTGTAAAACCCAAGGAGATTTGGCTCTGGTAAGATAGTTTTCCTTGAGGGCAGGTCATTATTAAGGAGAAGAGAGCACTGTGGGCTTATTTCAAAAC…	0.417486338797814
47_SCN1A	AGGTGGAGCTTGGAGTGA	57.352	ACAAACCAGTATCGAGTAATGAGA	57.474	900	47	chr2:166817970+166818869	SCN1A		2	2	165961460	165962359	900	99% (1 x 2)	AGGTGGAGCTTGGAGTGAGCTGAGATAGCACCACTGCATTCCAGCCTGGGCGACAGAGCGAGACTCTGTCCCCCACAAAAAAAGTAGGCATCCGTGTCTTATTTTAAATCTTAGAGGAAAGGCCTTCAATTTTTCCCTTTTCAGAACAGTGTTAGCCGTGGATTTGTCATATATGGCCTTTATGATTTTGAGGAATGTTCCTTCCATACCCAATTTGTTGAGGGTTTTTATCATGAAGAGATGTCGATTTTTTTTTTTTTTTTTTTTTTTCTGAGGCAGAGTCTCACTCTGTCGCCCAGGCTGGAGTGCAGTGGCACGATCTTGGCTCACTGCAACCTCGGCCTCCCAGGTTCAAGTGATTCTCCTGTCTCAGCCTCCTGAGTAGCTAGGATTACAGGT…	0.407777777777778
48_SCN1A	CTTGAAAACAATATGTCGTACATGG	57.047	GCAGAAACTGTGAATCAAGGG	57.434	890	48	chr2:166826175+166827064	SCN1A		2	2	165969665	165970554	890	97.9% (1 x 2)	CTTGAAAACAATATGTCGTACATGGTAAATACACATAATTTTATATGTCAAGTTAAAAATTAAATAAAATAATAAAGATAATGAACATTTAAAAAAATCACTTGAAAGACTTGTTAAAACACAGACTGCTGGACCCCTACCTGTAGAGGTTCTAATTCAGTGGAGATGCTGGGAAGGAGACAAAAATATAAATTTTTAACAAGTTCCCATGTGATGCTGTTGCTGTTGGTCTGGGGACCACACTTTGAAAGCCACTGCTTTAGTAAAACTTTTAAAATATAGTATTAAGACTATTTATTGATCAAACTTACTTCACCATGAGAATATTATAATGAACACAAAGAACAGTCTGGATGTACTGATAGGTGGCTTTTATCTGGCATAAGAAGAATGTGTGCA…	0.360674157303371
49_SCN1A	CAGTTTTCCCCTCACAGTGTT	58.345	ACCTTTTATCACGGTTCTCAGCT	59.992	918	49	chr2:166828618+166829535	SCN1A		2	2	165972108	165973025	918	99.7% (1 x 2)	CAGTTTTCCCCTCACAGTGTTAAAGAAGCCACTGGGAAGTTCGCACTGCGGGAAGTTCAGACTGTATGAAACTCACTACAGCACAGCAAAGTGCCTGGGGCCAAACTGCCTGTCTAGATTCCTCCTCATTGGGCAGGGCATCTCTGAAAGAAAGGCAGCAGCCTCAGTCAGGAGCTTATAGATAAAACTCCTATCTCCCTGGGACAAGGCACCTAGGGGAAGGAATGGCTGTAGGCACAGCTTCAGCAGGCTTACACATTCCTGCCTGCTGGCTCTGAAGAGAACAGCAGATCTCCCAGCACAGTACTCAAGCTCTGCTAAGGGACAGACTGCCTCCTCAAGTGGGTCCCTGACCCCTGTGGCTCCTGACTGGGAGAGACCTCCCAGGAGGGGTTGACA…	0.490196078431373
50_SCN1A	ACAAAGTGTTTCTCAGACTGCA	58.39	GGAATGGTACCAGCTTCTCTTAGT	59.84	882	50	chr2:166831061+166831942	SCN1A	Via online Primer3.	2	2	165974551	165975432	882	99.4% (1 x 2)	ACAAAGTGTTTCTCAGACTGCATTGCAATCAAATTAGACATCAGGATTAAGAAACTCACTCAAAACAGCACAACTACATGGAAACGGAACAGCCTACTCCTGGATGACTACTGGGTAAATAACAAAATTAAAGCAGAAATAAATAAATTCTTTGAAACCACTGAAAACAAAGACAATGTACCAGAATCTCTGGGACACAGCTAAAACAGTGTTAAGAGTGAAATTTATAGCACATTAAATATATAAATATAGATATACATAATATAATATATATAAATATAAATATAGCACTAAATTTATAGCACATCAGAAAGTGGAAAAGATCTAAAATCAACACCCTAACATCACAATTAAAAGAACTAGAGAAGCAAGACCAAACAAATTAAAAAGCTAGCAGAA…	0.331065759637188
51_SCN1A	ACCATCTCACACCAGTTAGAATG	58.16	TGAAATAAACAGGGTTGCAGATATT	57.28	903	51	chr2:166833782+166834684	SCN1A	Via online Primer3.	2	1	85772259	85772582	324	99.1% (1 x 1)	ACCATCTCACACCAGTTAGAATGGCAATCATTAAAAAGTCAGGAAACAACAGGTGCTGGAGAGGATGTGGAGAAATAGGAACACTTTTACACTGTTGGTGGGACTGTAAACTAGTTCAACCATTGTGGAAGTCAGTGTGGCGATTCCTCAGGGATCTAGAACTAGAAATACCATTTGACCCAGCCATCCCATTACTGGGTATATACCCAAATGACTATAAATCTTGCTGCTATAAAGACACATGCACACGTATGTTTATTGCGGCGTTATTCACAATAGCCTGACTTTTTAATGATCGCCATTCTAACTGGTGTGAGATGGTGT	0.416666666666667
51_SCN1A	ACCATCTCACACCAGTTAGAATG	58.16	TGAAATAAACAGGGTTGCAGATATT	57.28	903	51	chr2:166833782+166834684	SCN1A	Via online Primer3.	2	2	165977272	165978174	903	99.2% (1 x 2)	ACCATCTCACACCAGTTAGAATGGCAGTCATTAAAAAGTCAGGAAACAACAGATGCTGGAGAGGATGTGGAGAAATAGGAATGCTTTTACACTGTTGGTGGGAGAGTAAATTGGTTCAACCATTGTGGAAGACAGTGTGGTGATTCCTCAAGGATCTAGAACCAGAAATACCATTTGACCCAGAAATCCCATTACTGGGTATATACCCAAATGATTATAAATGGTTCTACTATAAAGACACATGCACACGTATGTTTATTGCAGCACTATTCACAATAGCAAAGACTTGGAACCAACCCAAATGTCCATCAATGATAGACTGGATAAAGAAAATATGGCACATAAACTCCATGGAATACTATATAGCCATAAAAAAAGAATGAGTTCATGTCCTTTGCA…	0.40531561461794
51_SCN1A	ACCATCTCACACCAGTTAGAATG	58.16	TGAAATAAACAGGGTTGCAGATATT	57.28	903	51	chr2:166833782+166834684	SCN1A	Via online Primer3.	2	11	99783272	99784786	1515	99.1% (1 x 1)	ACCATCTCACACCAGTTAGAATGGCAATCATTAAAAAGTCAGGAAACAACAGGTGCTGGAGAGGATGTGGAGAAATAGGAACACTTTTACACTGTTGGTGGGACTGTAAACTAGTTCAACCATTGTGGAAGTCAGTGTGGCGATTCCTCAGGGATCTAGAACTAGAAATACCATTTGACCCAGCCATCCCATTACTGGGTATATACCCAAAGGACTATAAATCATGCTGCTATAAAGACACATGCACACGTATGTTTATTGTGGCATTATTCACAATAGCAAAGACTTGGAACCAACCCAAATGTCCAACAATGATAGACTGGATTAAGAAAATGTGGCACATATACACCATGGAATACTATGCAGCCATAAAAAAGGATGAGTTCATGTCCTTTGTAG…	0.413201320132013
51_SCN1A	ACCATCTCACACCAGTTAGAATG	58.16	TGAAATAAACAGGGTTGCAGATATT	57.28	903	51	chr2:166833782+166834684	SCN1A	Via online Primer3.	2	12	55214685	55215532	848	99.1% (1 x 1)	ACCATCTCACACCAGTTAGAATGGCAATCATTAAAAAGTCAGGAAACAACAGGTGCTGGAGAGGATGTGGAGAAATAGGTACACTTTTACACTGTTGGTGGGACTGTAAACTAGTTCAACCACTGTGGAAGTCAGTGTGGCGATTCCTCAGGGATCTAGAACTAGAAATACCATTTGACCCAGCCATCCCATTACTGGGTATATACCCAAAGGACTATAAATCATGCTGCTATAAAGACACATGCACACGTATGTTTATTGCGGCACTATTCACAATAGCAAAGACTTGGAACCAACCCAAATGTCCAACAATGATAGACTGGGTTAAGAAAATGTGGCACATATACACCATGGAATACTATGCAGCCATAAAAAACGATGAGTTCATGTCCTTTGTAG…	0.398584905660377
52_SCN1A	TCTTTACAGGTATGGTATGCACTCT	59.34	ACATCACTACATTAAAAGCTCAGAC	57.4	885	52	chr2:166837390+166838274	SCN1A	Via online Primer3.	2	2	165980880	165981764	885	99.1% (1 x 2)	TCTTTACAGGTATGGTATGCACTCTTATGCATGTAACATATGCTCTTTTAAATATGAGTCATATGTATCCAATATTACTGTAATATACCAAGGTCAACTTTCATTTGTAAGTTTTGTGATATCTTATTCTTTTATGTATCTTCTATATAATGGAAGCCCTCTGATATTCTGTATAAGTAAAGAAAAAAGATTTTAGAGGCATAAAAACTTAAAAAAAAACTAAAGCAATACTAACATTTAATTCAATTGCTCATTTACTAAATACTTACTCATCATTTTGTGTATGCCAAGCACTATAGAAGTTCATTTCTGCCTATCAGGCAGATGGTATATGTTTTCTTGTGGCAGCGTAGAAGTAAGGGTGATAAAAGGGGGAAACCTACATTCCCACATATACAT…	0.336723163841808
53_SCN1A	ACTCTCACCGACTTTTGCTTCT	59.9	TCAAGTTATCTTTCTAATTCGGCAA	57.08	918	53	chr2:166839165+166840082	SCN1A	Via online Primer3.	2	2	165982655	165983572	918	99.1% (1 x 2)	ACTCTCACCGACTTTTGCTTCTTTTACAATTTCTAAATGGGTCTTCATCACCAAGGCCCCCACCCTGCATTTAAAGCCCTTTATCATCTGAGTCCTGCTTGTCTCTCAGTCACTGTCATTGCTCCTTTTTCACATTAGCAACAGTGAACTCTTAAAAATGCTCTGAACTGTCCTTGTGTTTCTCATTTTCATATGTGTCTTTAATTGTCATCATTAAAACAAAGACTTATGTAGTAATTATATGCCTGGAACTGTTGATCTGAAAGCTTTACTTCCGTTAACTCATTTAGTCCTCATAAGAATTATTATTACCATTTTTACAGATGATGAAATTGAGGCAATGAGAGGCCAAGAAACTTTTGTAATATCAGTATAGCTGATATTTGGATCCAGGCAATC…	0.428104575163399
54_SCN1A	GGACCACCCGAGTAACCTTT	59.311	CACACACAGAGGCATACCCA	59.675	891	54	chr2:166844656+166845546	SCN1A		2	2	165988146	165989036	891	99.7% (1 x 2)	GGACCACCCGAGTAACCTTTCCATGATATCTGTGAATTCTGCACTGGACTTCACTGTGGTTCCCCCAGTTACTGTTTTTCTTTATCTGCAAAAGTTAGCAAGATTAAGACCCCAAGCTGAAGCAAGGCACATCTTTGCTTCCTGCTGACTTTCATGAGCTGTTGAATCACCTTGTGTCAGCCAGGCAGGAGACAGATGGCATGCTGAAATGAGGCATATAGAAGAATTTCATGAAGGGGACATTTACAAAAGTGTCAGCAATGTTAGGAGAAAGCTACAAGGAATACAAAAGCACTCTCAATGCAGCAGCAGACCTGAAGGAGCAAGGGGAGGAGTGATTACCTGACCCCAGAGAAAGTAGCTTCAGTTGTATGAGGGGCAGTCTGATTGGAGTATGAC…	0.457912457912458
55_SCN1A	ACCTTATGCTTAGTGAGTGGCG	60.42	ACTTATTCATTCCCCAGTAGGTTGA	59.51	870	55	chr2:166852896+166853765	SCN1A	Via online Primer3.	2	2	165996386	165997255	870	99.8% (1 x 2)	ACCTTATGCTTAGTGAGTGGCGAAATTTGGTTCACTGAGATAATAAATACTTGGTACCTTATACTATACATACTACCTTTATGATGTTAAAGGCAATAATTTTCTTATTTAAATGTAGCAAAGAGTTAGAGGATGTATACTGCAAGACAGTTTGGAGTTACTCATTAAAAAAGTCACTCTAACTCTGTCAAGAATTGGAGGAAAGGGATAAAAAGAAAACTGGATGAGTTAGTGAGAGATTTAGGGGATAAATCAGAGCTCATAGCATAGTAAGTATGGGACAGACCAGTAGGGATAGAAGATTGGAACACTGGCAAGTAAGTGAAATAGAGTAGCCTGATATTGACTTAAGAATACTACTGGTAATAAGAAAAGGGAATTGAGGGGAGAATGTTCTGT…	0.32183908045977
56_SCN1A	TCTGCAGGGTGATCAAAGTGA	59.301	ATTTGGGCACTTATTCTAACCCTT	58.41	915	56	chr2:166856687+166857601	SCN1A		2	2	166000177	166001091	915	99.7% (1 x 2)	TCTGCAGGGTGATCAAAGTGATTGAAAATTTAAGATTTCTCTTTATTGTAACAATGTAAGGATAGTACCAGGATACATAAAGGCAGGGTTGCAACTATCCTTTTAAGAATTTTGGAGCAAAACATTTAGAAATACAATCCTTTTAAGAATTTTGCATCAAAACATTTAGAAATAACCCCCTATTCTATTTTCTTTCTGAAATTCTTGAAGATAATAAGTTAATATGAATAAGAAATGTGAACAATAGTACAGCAGACACTTGGCACTCACAGGATGAAGGATACTCAGGCTAACAACTTACAGTAATTTGTTACTTGTCCTGGGGCATGAATTTTGAGTCCTGTGGGCCTAAAAGGATTATCCCTTAGCTAGTGAGGGAGGTTAGCAAAGCCTTTAGCG…	0.344262295081967
57_SCN1A	TGACACCTCTGGAAGAGCTG	59.028	ACAAGTTTATGAGCCCAGATGG	58.375	922	57	chr2:166857928+166858849	SCN1A		2	2	166001418	166002339	922	99% (1 x 2)	TGACACCTCTGGAAGAGCTGCAAAAGGGTTTTGACCAGTGTTGGTTTGTTTGCTTAGTTAGTCTTCTGGTTGAACAGTTGAAATCATAACCTTGGTGAGCAAAAATTGATTTCTGCCCTAAAGACACTGTAGAACCACAAGGGAAGAAAGAAATTGTACAGTCTTTTTTTTTTAAGCTGAGTTTTCAAATAATCTGGACTCTTATTTTATTCCCTGCTTTGTTGTGGTGCTGCTGCAGCTAGAAGCAGAATCAAATGAAAATGTTTAAAGGGCTACCTTTTTTAAATATAAATTATAAACTATTTTTCTTGGAGACCCAGTCTTAGAGACCCAGTAGTGAAAACATTAATATTTAGGACAAAATAGACTTAAATAATGGTGCTGAAAGGTCATTTGAGA…	0.345986984815618
58_SCN1A	ACTTGCACTGTCATCTGTCTCC	60.289	TCAATCCCCAGTTTCAAAGTAAACC	59.697	915	58	chr2:166861020+166861934	SCN1A		2	2	166004510	166005424	915	99.9% (1 x 2)	ACTTGCACTGTCATCTGTCTCCTAACCTTCTCCTTCATTTAATCTATGTAAGATGAATTAATCTTCCCCAAGTCCCACTTGAAAGTTATTTATTGGCTCTCTGGTAACTAACAAATATTTTTCTTACCTTGGTATTCACATCACTCCACAATCTATATTTCCAGTTTTAACTTCCCTGGTCATCTATACTTCATGCCACTTCAATTAATATAATAACCGTGTGCTAATATAATTGCCAGGTGATTGAGATGCCATTTACATTGAAATTCCTTGTCTAATAGCTCCTCTTCTGAAATACTCTCCCCTCTTAAAGGCTTTAGTTCAAATAGCACTTCTTTCATGGAGCCTAACTTTGTCCCCCAGTTTAGCCTCCAAAATAAAGAGGAATGTTTTCCCCTT…	0.347540983606557
59_SCN1A	ACCTCAGGAAGTTTTAAAGGGT	57.191	CACATCAGCAGTTTGTAGGGA	57.942	904	59	chr2:166867469+166868372	SCN1A		2	2	166010959	166011862	904	98.7% (1 x 2)	ACCTCAGGAAGTTTTAAAGGGTTAAATTACATTTAGATTTAAATTATAGTGTAAACAATTCTGAAATTGAAACATAATGTAACTTCTAATGCTTGAAACCTCAATATTACAAACTTTCTCCCTTATTGATGTGATAAAGCAATTCTTCCTTTGAGATTTCTCTCAATTGGCTCATTTCACAGTAACATTGTTAAGTTTTTTAAATAGCTTAGTTTTGCCTTTGTTCAGGGTCAAGGAAATATAATGCATTCATGATTCTTAGCTCAAGAAACACTTTCCACAAGAAACCCTCATAGTCTTGCTGGGTTAGTATCTTTTTGGGGTAAAACTACTCAATATGAAATCAGGATAGTTTTGCTGTAGCTTTCTAAAGCTGAAATTTTGCCAAGTTGATAATAG…	0.336283185840708
60_SCN1A	CACTAGCAATCCGTTTAGTTTTAGC	58.75	ACTGCAGAATAACCTAACGACA	57.47	890	60	chr2:166871745+166872634	SCN1A	Via online Primer3.	2	2	166015235	166016124	890	99.1% (1 x 2)	CACTAGCAATCCGTTTAGTTTTAGCAGTCAGAAAGTTACTTTTAAGGCAAATTCTGTGTAGGATCATTTTCAGTAGTGTCTAAGATGCCAACTTATTGTGAAATCACTACTTACTTTAAAAATATAAGTTAGAAGTTTTGATGGTACTAAAATATTTTTCCTCCATGTTCTTAATCTCTTCCACATATTGGGCAGATATAATCAAAGCATGACACTAGACTTTAAGTTTTTTTGTCTGTCAACATATTAGAGGTGATTGAATTATATCTATTACAAAGTGCCATTTTATTATATGTGATTTATTTTAGCTGACCAACAGCTAAACAAGCTGCACTCCAAATGAAAGATTAACATTAGGATTCTTTTCTTTACCTTCAGTGAAACAAGCTTCTGGTTCAA…	0.356179775280899
61_SCN1A	ACATCTTCAATTTCTGGCAAGTATT	57.528	ATAGTATGCAGGCCTATTTAATGTG	57.072	890	61	chr2:166872834+166873723	SCN1A		2	2	166016324	166017213	890	99.2% (1 x 2)	ACATCTTCAATTTCTGGCAAGTATTTTAGAGCCTGAAGTGTTGTAAAATGAGATAAATAGTGTGTGGGAAAATTCAGTTTCCTCTGACAAATCATGTTTATGTTAATGTGCCATGTGAAGCTGAAAGAACAAAATCTAGTTAAACAACAACAACAATAACAATATCCTTCATATTTTGACAATAGTGATGGGATGCACATTTCTCTTTCTAGAGTTCTCAGAAGACAAAGATGGCAGAGATAATAGAAAATATTAACTAACATATTAAGATAGGAAAAACTCATGACGCTCTTTCTGAAGACCAGCAAACTGGCTTATAAGTTTTTGGCAAGTGTAATTAATTCATTAATTTATTCAACTAATATTTTTTGAACACCAACAATATGCTACCAGCTGAGT…	0.319101123595506
62_SCN1A	TCTCCCAAATTTGTCTTTCACAG	57.227	GCAACCTGAATTTAGTATCTTCTCA	57.15	929	62	chr2:166876368+166877296	SCN1A		2	2	166019858	166020786	929	98.5% (1 x 2)	TCTCCCAAATTTGTCTTTCACAGATAGAAGCTGTATGTTAATCAAGGTGAACTTCTTTTTTTTTTTTTTTTGAGACAGAGTCTCGCTCTGTCGTCCACGCTGGAGTGCAGTGGCGCGATCTCGGCTCACTGCAAGCTCCGCCTCCCAGGCTCATGCCATTCTCCTGCCTCAGCCTCCCAAGTAGCTGGGACTACAGGCGCCCGCCACCATGCCCGGCTAATTTTTTGTATTTTTAGTAGAGACAGGGTTTCACCATGTTAGCCAGGAGGGTCTCGATCTCCTGATCTTGTGATCCACCCGTCTCGGCCTCCCAAAGTGCTGGGATTACAGGCGTGATCCACCACGCCCGGCCCAAGGTGAACTTCTTAATGTTCTCTGACTTTTTCTCCTAGTGATTTT…	0.38751345532831
63_SCN1A	CAGGAGTGAGCCACGGTG	60.048	AGAAGGGATGAAAGAACCTAACAAA	58.389	900	63	chr2:166881439+166882338	SCN1A		2	2	166024929	166025828	900	99.5% (1 x 2)	CAGGAGTGAGCCACGGTGCTTGGTCTTTTGCCTATTTTTCTATTGGAGTATTAGTGTTCTTATTTGATTGCAATTGCTCTTTACACATAGAAAATCATTTGAGTTTTCCTAACAAGGATTATTTGCCAAATGTATTTGTTTTCTGTGTCTGTGTAACAAATGAGCATACACCCAGCATCTTAACATACATTCACCAACTCACAGTTTCTGTAGGTCGGAAGTCTGGCACTGCCTAGTTGGATTCTCTGCTCAGGGTCTCATTGAGATGATGTCAAGGTGTTGGCTGGAAATCCAGTTCTTTTCCAGGGCTCAGGATCTTCTTCCAAGTTTACTGTCGTTGGCAGAGTTCATTTCTCATAATTATAAGACTGGGCTTCCTACTTTCCTGCCAGCTCATGG…	0.401111111111111
64_SCN1A	GGTCCAATTCTTTATTTGATTGGGA	57.82	AGTGGTTATTGAATGCCCTGG	58.26	870	64	chr2:166882849+166883719	SCN1A	Via Primer-BLAST.	2	2	166026340	166027209	870	99.2% (1 x 2)	GGTCCAATTCTTTATTTGATTGGGATAATAACACTATTATTATTAAATACTCAAAAAGGGAAGGAAAAGCTCCTCTTCAGATGTGTAGGAAAAGTCCACCTCTATGTTAGCACATGAAATACGAATTCATATAAAATTCTAAAGAAATTCAATAACGGCAAAACTAAAATATTCTCAAATAAGTATTTTTACAGATTTAAAAATCAGTAAGGCCAATTAATTTTTCCTTTTTTGTTCTTAGATTGAAATTTAATTTCATTTTGAAATTTGCTATTCACTAATAAAGTAATTTGTTCTCACTGTTTTAGAGATTAATGGAATATTTCTCTTTCTTTCTTTCTTTTTTTTTTTTTTTTTTTTTTGAGACTGAGTCTTGCTCTGTCGCTCAGGCTGGAGTGC…	0.35632183908046
65_SCN1A	GTGGTCAGTTTTGCAGGGAC	59.331	GATTTGGTGTTAACTTCCAATCACT	58.018	916	65	chr2:166885657+166886572	SCN1A		2	2	166029147	166030062	916	99.5% (1 x 2)	GTGGTCAGTTTTGCAGGGACTTGTACCCATGTTAAGTAGTATAGACTCCATACTGTGAGCAATGGGCAACTCCTGAAAGGTTAGGGAGGACAGAACGGTTACGGGATTTGCATTTTAGAAAGACCACCTATTGTTTTGTCAAGACTACACTAGCGAGAGGAGACCCGTTTGGAGGCTGTAGCAGTAAAACTGGAAGATGATGGAGGTCTGACACTGGGTAAAGGCCTTGGGAATGCAGAGAGGTGGACAAAGATAGGTAGCTTTGGCAGTCCCTAGTGATCAATTAGAAGTAGTGGAGATAGTACTCTTGGGTTCCATGGATAGTACTCTTCGCAGAGAGTAGTTGCCATCTCTTAGAGACTATGTGCTTAGGTTGGAGATTGTCGTATGTTCCTTAAC…	0.420305676855895
66_SCN1A	TGCTGTTAACCTATGCCCAATG	58.977	ACTGCCAAGACTATGCAAAAGAC	59.496	916	66	chr2:166886523+166887438	SCN1A		2	2	166030013	166030928	916	99.6% (1 x 2)	TGCTGTTAACCTATGCCCAATGTGCAGTGATTGGAAGTTAACACCAAATCTATAGTTGACACCTGTACCTAGTTCTTCAACAAATAGTATTATTTATTTCAGAACTATGCCAAAGAAAGTACATTTTCAGACACTATTAAGATTTAGTGTAGCGGTTAAGAGCGTGACTCTGGAGCAGACTATGGAGCAGACTGCCAGGACCAACCACTTACTGTTTGTGTAACTTTGGCAAGTTTTCCTTTGTTCAAAATATGTTTATTTTTCTCATCTTAAGGCTGGAATAACAGTGTGTCTTACGGCATAAAGACTGAATGGGACAATATATGCCCTCCAATAGTACTTTGTCCATGGTGAACATTTAAACAATAGCTGTTATTAACATAACCTGAATTACTAAGG…	0.325327510917031
67_SCN1A	ATAAAATGTATCACCATCCCCAGAT	57.893	TGACAGCAGATGCCCCAATA	59.082	891	67	chr2:166888064+166888954	SCN1A		2	2	166031554	166032444	891	99.6% (1 x 2)	ATAAAATGTATCACCATCCCCAGATAAACTTATAAAACAATTTATTACAGAGGGCAAAAGGCAAACAACAAAAAAAGACAAATAGTGGAGTATGTTACCAGTAGTAATTCTTGTAAGAAAACTTACTGGAACAGTGTGGAATGCAACTGGTAACAATAATAATGATGATTTACCAGATATTCTATATTAATTAGGCACTGTGCTAAGTACTTCACATTTATTATCTCATTTAATACTCTGTCCCAGAAATGCAGTCAGTAACATTATGCACATTTTTGAGATGAGGAAACTGATTATTAGATAGGTAAAGTCACACAGTAAGCGGCTAAAATGAAATTATATAACCCAGTATCTGGCTCCAGAGTATAACCATTTACCAACTTTATAACTGTGGCCTCA…	0.325476992143659
68_SCN1A	TACTCCTTTATCTAGTCTCCCTGG	58.045	TCCCAGAGATATAAGGCATAGAGT	57.841	901	68	chr2:166888786+166889686	SCN1A		2	2	166032276	166033176	901	99.5% (1 x 2)	TACTCCTTTATCTAGTCTCCCTGGCATATGATAACTGATAAATAAATGAAAATAGGCAAAAAGAATAAAGGCTAAAACAAAAAGAACCAAAATGATGAGATTAATATACTACAGGCAGCATTCCTAATGTAGAACAAAGACTCTTCATCTATTGGGGCATCTGCTGTCAGCTTAATTCCTCTAAAAGCAGAATATCTCATAATTTATGCCTTACTTTGATGAACAGAATACAGTATAAGACTGATGAAGCAATGAGGGCAAACAATATTGTGTGGGTTTATTTCTGACCAAGAAGAAAGGAATTGTGAAGTAAAAGTGCCAGGAAATTTGATACAATGTGGTAATCTGTGAAAGAATATAAAAAGAAAGCCAGATTCAAAAATGAATAAAAGAAATTGA…	0.32519422863485
69_SCN1A	GGACTTCAGACACTATGCCCA	59.44	AGATCCTGTCACATTTCCATGTCT	59.77	889	69	chr2:166889787+166890675	SCN1A	Via Primer-BLAST.	2	2	166033277	166034165	889	99.4% (1 x 2)	GGACTTCAGACACTATGCCCATGAACCAAGTGGTTGCATTCTAATTAGACAAACAAAACATTAAAGTTCAGCACAGGTGGCAAAAGCTTCATTTACCAGGACTTCTCCCTCTGACATGAAATGTGCTCTAACGTTATTCTGTTCTATTTCATTGGCCGGGTGCAGTAGCTCACACCTGTAATCCCAGCACTTTGGGAGGCTGAGGTGGGCGGATCACTATTTCATTAAAATTAAAAAAAAAAACTGGCCTATTAAAGGGATTTCTCAAGTCTAACTAAACTATGACTCACAATTTGAGAAGCACCACATTAAATTATCTCTAAAGTTTCTATTACCTTAACATTTAAAATTTCAATTAATGCAATGTTCCAAGATATAAAATACCACAAAGTAGAAAGA…	0.320584926884139
70_SCN1A	ACACTGTACGGTAAATATTGGTTGT	58.767	TGCTGTGGTGTTTCCTTCTC	58.033	918	70	chr2:166892257+166893174	SCN1A		2	2	166035747	166036664	918	99.4% (1 x 2)	ACACTGTACGGTAAATATTGGTTGTTTATCCTTGTAATCACGTGGTTGACTGGGAGCTGCAGCTTGCTGCCCCTGCCCAGCATGAGAGTATATTGTACCACAAATTGCTAGCCTGGGAAAAGATCAAAATTCAAAATTTAGAGCATGGTTTCTAGTGAATGGCTATTGCTTTTGTATTATCATAAAGTAAAAAAAAAAAAAAATCTTAAGTCAAAACATCATTAAGCTGAGGATCATCTGTATGTGTGTATATGTATATATGTATATGTATTCATACCTTCCCACACCTATAGAATCTTACCTCTTTGCTTTCTTCCAGATCCGATTCACTACTAAAGTCTTCCGTGTTTAAATTTTCAAAGTCAGATTCTCCTACAGCAATTGGTACAGTCACAGTAA…	0.347494553376906
71_SCN1A	AATCACTAATGTTTCCAAGTATGCA	57.298	CTAGTGGTATGTACCCACTTAAGAT	57.401	918	71	chr2:166893374+166894291	SCN1A		2	2	166036864	166037781	918	95.3% (1 x 2)	AATCACTAATGTTTCCAAGTATGCATTTAAATGCATTCTATAATTTTTCAATAAACAAAGATATTAAATTGGATGTCAATTGAAAAATAACCATTACAACTCAGAATGAAGATTAGGAGCTTAACATAGGCTGACACTTGTTTTCTTAATCTATTATATTTCTCATACTTCATTGTTGACTAAGTAGAGCTGTTTATGAATAATCTCTCATATTTCCATGAGACTGGCACATGAATGTACATACCTTTAGAATATTTTATGTATTACTATACTATAAACAGTAACACTCCAAATTTAAGAGAGATAAAGATTGATCAGTTACTCCATTATGGTAATCTCAGGCATCATTAGCCATTCGAGAACTGATGAACTCAGGTTGGCTAGTGCATCTGCCATATG…	0.320261437908497
72_SCN1A	CCATGAGACTGGCACATGAA	57.88	TTGTGTCTGCAAGATCGCCA	60.14	890	72	chr2:166893589+166894478	SCN1A	First SNP from old #72. Via Primer-BLAST.	2	2	166037079	166037968	890	99.2% (1 x 2)	CCATGAGACTGGCACATGAATGTACATACCTTTAGAATATTTTATGTATTACTATACTATAAACAGTAACACTCCAAATTTAAGAGAGATAAAGATTGATCAGTTACTCCATTATGGTAATCTCAGGCATCATTAGCCATTCGAGAACTGATGAACTCAGGTTGGCTAGTGCATCTGCCATATGACATAGAGTGATTGAATATCATATGCTGCAATGGGGCAAAGAAATGGCACAAGCATTATGAACTCTTAAAGACACCACTTTTTAGTCCTAGTCTGGATGGTAATTTTGCACTTTCTCTCTACTTTTTTTAGACTTCTCTCTTCCTTGGCTCTGAATTTATAAAATGGTCCCAGCACATCCTTTTAGGCTCATCTCAATATGATACTCTATTGTAA…	0.373033707865169
73_SCN1A	TGCCACCACACCTGGTTAAATA	59.89	CCTTTCTAACAATCAGGGTTCTTGC	60.34	899	73	chr2:166894999+166895897	SCN1A	Via Primer-BLAST.	2	2	166038489	166039387	899	99.7% (1 x 2)	TGCCACCACACCTGGTTAAATATATATATAGTAGAGACGGAGTTTCACCATGTTGGCCAGGCTGGTCACGAACTCCTGACCTCAAGTGATCCAACTGCCTCAGTCTCCCAAAGTGCTAGGATTACAGGCATGAGCCACCAAGCCAGGCCTCTTATAGTGAATTTTTAATGAGTACTTGGAATCCAACTGTTCTTAATTTGTTTTATAAAGGTGGTTCTAAGGCCGGATATTATAATATTAACATCTGAATCTGAAATATCTCTGCTGAAAGATATTAATTTGCCAGTAGTGTGCAAAGTAACATCATACTGAGCCCTGATATAAGTAAAGTGTTCATTATTCATTAATGCTCCTTAGGGGTATTCATGTAGTTACATCCACCTGCATTGAAAAACTTGG…	0.343715239154616
74_SCN1A	GTCATTCATGTGCCAGCGTG	60.18	ACACTTTACTTATATCAGGGCTCA	57.19	908	74	chr2:166894424+166895331	SCN1A	Second SNP from old #72. Via Primer-BLAST.	2	2	166037914	166038821	908	99.1% (1 x 2)	GTCATTCATGTGCCAGCGTGGGAGTTGACAATCACTGGCGATCTTGCAGACACAATCTTTGTAGCTTTTACCAAAGAGCTGCATGCCGACCACGGCAAAAATGAAGACGATGATGGCCAAGACGAGGGTTAAATTTCCCAGAGCCCCCACGGAATTGCCGATGATCTTTATTAGCATATTTAACGTTGGCCAAGATTTTGCCAACTTGAAAACTCGCAGCTGGAAAATGAAAGATTAATATATATTTGTATGATTCTTAAAAGCATTATATATATTGAGCTTTACCTAGAAATGGTCATTAGAATTCAATATCTTACAATATCTGATCTGCCCTAACCGTCTCAGGCTCATGGCTAATTTTTGGACTCCCTAGGAAAAGCTGGATTTTCCATATTTTAA…	0.414096916299559
75_SCN1A	AATCCTTCCACATTGGCGAG	58.245	AACTCTGATTGAGGGAAATAGGAA	57.357	917	75	chr2:166895958+166896874	SCN1A		2	2	166039448	166040364	917	99.3% (1 x 2)	AATCCTTCCACATTGGCGAGTCCAAGTTCTACCAGGCTAAGCGTCACAATAAAACCGTCAAAGATATTCCAGCCTTCTTGGAAATAATAGTAAGGATCCATGGCAATAATTTTCAGAAACATTTCTGCTGTAAAGATCCCAGTGAAAACCTAAGATCAAAACAAAATTAATCTAATTCCACCAGATAATAACATACATGACATAAGATTTGCTCTTAGAACATAATGCTTATGCTATTTTCCCACAATGATTCTATTACTAACTTAAATTTGTATGGCAATTTGTAGTTGATGAAAGACTTTCATATACATTATTTAATTTTATCCTTGTGGAAACGCGAAGTAGATAATATACAATTATTACTTTACAGATAAGGAAACTGAGGTCTTCAGATGGGTG…	0.400218102508179
76_SCN1A	CTTTAGATAGCTCTTTCCTTCAGCA	58.66	GAACTTGAAGAATCCAGGCAGA	58.32	900	76	chr2:166897081+166897980	SCN1A	New #76. Via Primer-BLAST.	2	2	166040571	166041470	900	99.6% (1 x 2)	CTTTAGATAGCTCTTTCCTTCAGCAAATAAAAGCTAGTATTCCTAAGTTGAGTTGACTGGCAAACACTTTAATAATTTATGTTTTTGAAGCACAAAAAGGAAAAATTAAGTGGCAATCTTCACCAAAAATGACCTTTGTAATCATATAACACACAAAATGTACTGGAAGTTTTCAATAGTTCATGGTTTTGATATAGAATAGATGGATAAACAATACATGTACTACTTAGATCCTGGAAGAGGAAAAGCTGGAGACATTTTTGAGTTGTTAAATTATTTCTTGCAGTGATGATGACTAAGAAGGATAAAAGAGATCCACAATTTTATTTTAATCTTCTACAGTAAGGGAAATTGTAATAATATCTCAAAAAGTATGTTCTTAATCTATGAGCTACTTCT…	0.343333333333333
77_SCN1A	TTACCTTCCAATATGCTTACCAAGT	58.27	TGAGTGATATTGGGACTAAGAATGT	57.56	900	77	chr2:166897721+166898620	SCN1A	New #77. Via Primer-BLAST.	2	2	166041211	166042110	900	99.2% (1 x 2)	TTACCTTCCAATATGCTTACCAAGTTTCCTACTGTAAGCACATTATTGAAATGGTCCGTCATTGGATAGTGCTCCATGGCCATGAAAAGAGTATTTAAGACAATACAGATGGTGATGGCCAGGTCAACAAATGGGTCCATCACAACCAGGTTGACAACATGTTTCACTTTTAACCAATATGGAGAACAGTCCCAGATTAAGAATATGTTGGAAAATTTATACCAACAGGGTGGGCATTTCTGCCTGGATTCTTCAAGTTCTAGATTAAGAAAAAAAAAAAAAAGAACCACCAAAAGGTATACTTTATACACACACATTTATTTCATATCCACTAAACTTATTTTCAGTAATCAACACATTTTTGTTACAGAGACAACCTTTTTTGTACTTGTTAAAAAA…	0.373333333333333
78_SCN1A	TGCACTTTCATATTCAATTGGTGA	57.41	CTCCAGTTGGAGGATTTGCT	57.5	900	78	chr2:166899036+166899935	SCN1A	New #78. Via Primer-BLAST.	2	2	166042526	166043425	900	97.8% (1 x 2)	TGCACTTTCATATTCAATTGGTGATGGCAGATATTTCTGACTTATTGTATCATTAGCCTGGAATGTTCAAACTGTTAACCATTTAGTCATACAGCAAAAACCAAGATGTTAACTTCCTGATTTCATAATTTTATAAAATACAAAATAATTTTAATATAGTTGATAAAACTCTTAAGAGATATATTTAACAGTTATTACCCTTATTTCTGAACTAATAGTAAAAGCCTAGTAACTTAAAAGTCCTACAAGTGATCAAGGCACTTGATTTTTGAGAAGGTAGCTATTTAATTTTAAGGAAGTATAAATGATTGCAACACACTTAGCTGCCATCTTATTTTCTGGACACAAGATGTAGATGGTCATTGACAACACAAACTCTATGTTAAAAAGAACACACAC…	0.322222222222222
79_SCN1A	GTCTCTCTCCGTGTCGTCG	59.58	ATCTTTTTGATCCTCAGCACTTTT	57.34	900	79	chr2:166900370+166901269	SCN1A	New #79. Via Primer-BLAST.	2	2	166043860	166044759	900	99.4% (1 x 2)	GTCTCTCTCCGTGTCGTCGGGGCACAAACAAGGAATCTCTACGGCTCTCGTTATCCTCAAAGGTGCTGTGCTCATCATCTGCGAAGTCGTTCTCAGATCCCACATCCTTTGCTCGCCCTCTAAAGCTGAAAAGGCTTGTTCTGCTATTTCGCCTTGGTGAAAATAGGGAGCCACGGATGCTCAACAAAGACTAGAAGTTTGAAAGAGCAAACAAATAAAGTCATATTAATATGGACATTTGAATGTGATTTCATTTTGCAAGATTATGTAGAAGGAGATTTCAGCATTCATAACAGAATATGGTTCATTCCTTTTGATTATCATTCTCATTTTATGTGCATTCACATTAAATTAAATTACCTTGATAAAAGAAAGTTTCTAGCCCTTGGGATTAAAGAA…	0.37
80_SCN1A	ACTCAGCAGTGCCATACCTG	59.749	TTGAAGATGGTGGGGACAGT	58.555	919	80	chr2:166901536+166902454	SCN1A		2	2	166045026	166045944	919	99.4% (1 x 2)	ACTCAGCAGTGCCATACCTGGTGTGGGGAGGAGTACCTCTTTTCATATGTCAATCGGTTCCCTTCAATGGAGAAGCGAAAACCTTTCCTCCTGATGCTGTCCTCAGATTCAGATTTTTGGAATTCATCCTCATCTTTCTCTTCCCCACCAGACTGCTCTTTCTGTTTTCTTTTCTTCCTCCGATTTCTTCTTTCCTTAGCACTCTTGGAACTCAACTTAGAGGCTTCAGATGAGCTGTCTGAGAGCCTGCCTGCTGCACTGGGCTCTCTGGAATGTTCTGAGGCAGTTGCCGTTGCTGCCTGCTATATTGAAGAGAAATGATTTTAACATAGCACCTGAAGAGACTGTATCTTTCTTTGAAAGGGCTGAAGTATTTGCATGGCTTTTAAAAAATATATT…	0.387377584330794
81_SCN1A	TTTAAGCTGTTCAATCATCTGCTGA	59.293	GCTTTGATACCTTCAGTTGGGC	59.836	916	81	chr2:166903301+166904216	SCN1A		2	2	166046791	166047706	916	99.8% (1 x 2)	TTTAAGCTGTTCAATCATCTGCTGAAATTCGGCCTCTTTCTGTTCTGCTTCTTCCAAGGTGGCCTGATTCTGTTCCTCGTAGGCCATGGCCACCACAGCCAGGATCAAATTTATTAGGTAGAATGAGCCCAAGAAAATGACCAATACAAAAAATATCATGTACGTTTTCCCAGCAGCACGTAATGTCTGCAAACAAAAATATCAGAATTATTTCTCAATATTATTTCACTAAGTGGTGGCTTCAACTTTCAATTTACTCATGTGTCTAGCAAAACTCAGATATAAATAGTAATTATGTTGGTCATAGCACCCTGTACTTTTTTTTTATTGTTTCTTTAACTTCAGCTTCTTCCTTCTCTTCTAGCTTATGCATTCACACTATGATTTCTATGGCAGAAT…	0.37882096069869
82_SCN1A	ATGTTGGTCATAGCACCCTGT	59.36	TGCTGCACCATATTTTAATGATGAC	58.49	885	82	chr2:166903595+166904479	SCN1A	New #82. Via Primer-BLAST.	2	2	166047085	166047969	885	99.6% (1 x 2)	ATGTTGGTCATAGCACCCTGTACTTTTTTTTTATTGTTTCTTTAACTTCAGCTTCTTCCTTCTCTTCTAGCTTATGCATTCACACTATGATTTCTATGGCAGAATTTTTGTATTCACCAAGAATGAAACAGTCAATAAAATGCCATGGAGTCCTCCATTAACGACCTGAGCCTTTAGGAAAGTCAAGGAACAGACCAAAGTTATCTTTCTATATCTGCTTTTTCATTTTCATTACTTCCCACCTGAGGGATAATATTTGAGGGGGTAGATAGGGCTGAAGGGAGAATGTGCCTTCTGTTTAGGACAATCTGTGTCTGAGAAGGGTAGGGAACAGGTTTTGAGCCAAGAAGAAATGGGAGAGAATTGCAATCCTTGGCATCACTCTGCTCAGTATGTGTT…	0.372881355932203
83_SCN1A	AAGTGAGGACATGCGGTACT	58.73	CGTGAGAATGGTGAACAAATGC	58.76	872	83	chr2:166904946+166905817	SCN1A	New #83. Via Primer-BLAST.	2	2	166048436	166049307	872	99.6% (1 x 2)	AAGTGAGGACATGCGGTACTTAGTTTTCTGTTCCTGCAATAGTTTGCTAAGGATAATAGCCTCCAGTTCTATCCATATCCCTGCAAAGGACATGATCTAGTTATTTTTTATGGCTGCATAGTATCCCATGATGTATATGTACCACATTTTCTTTATCCAGCCTATCATTGATGGACATTTAGGTTGATTCCATGTCTTTGCTATTGTGAATAGTGCTGCAATGAACATACGTGTGCATGTGTCTAAAAGTATTACTTCTTGTTTTAGAAAACATAAATCTTACCTAATATTTACATAATCTCATACTTTATCAAAAACCTTACATATAGCAAATTAATGTCAATAAAATTAGTTGGCTGTTATCTTCAGTTTCTATAAAAAGAGAGAAAAGATACACAT…	0.314220183486239
84_SCN1A	ATGATCTAACCTTAATGATCAGCCT	57.67	AAGGAGATAAAATATGTGAATGCCC	57.47	870	84	chr2:166906718+166907587	SCN1A	New #84. Via Primer-BLAST.	2	2	166050208	166051077	870	99.1% (1 x 2)	ATGATCTAACCTTAATGATCAGCCTTAACCTGAGGAAAATATAATTTTTCAGTTATAATAGTTACCTTTAATTTTAATAAATTTAATTTTCTATTATTTTCAGAAATGAACCATTTTATTTATATTTGCATTTGGTTTAAAATAAGAACCATAGATGTTTAGAGCTGAAAATGACCTCAGATATTATTTTACTTCGAGTATTGGAAAAATGCAGTCCAATAAATTTTCCCTAGAGAGAATAAACCCTAAATAACCCTCATAGTCAGTATTTTGAACTTAGATAAAACAAACAAACAACAGATTTCAGGGAGCTGGTGATTGAAGTGGACCTACTGGCATTCGTATCACCAGCTACTAAGGAGGCTGAGATGGGAAGATGCCACCACACCCAACTCATTA…	0.316091954022989
85_SCN1A	TTTGCATAGTATTGTAGAATTCGCA	57.453	TGACTGTGTTCTGTCTGAGC	57.484	900	85	chr2:166907536+166908435	SCN1A		2	2	166051026	166051925	900	98.5% (1 x 2)	TTTGCATAGTATTGTAGAATTCGCAAAGGGCATTCACATATTTTATCTCCTTTCATTATATCAATCACCACAGGAAGAATGTATAGCAACCAAGGATCCTAGGAAAATTCTTTCTAGCTGAATTCTTCAGCCTTCCAAATGATGATAAAATAGAAAGTGGCATTTAGGAGTCAAAACTAGAGTAGTTATGAACAAAGTTGTTAAATGTATGTGGAAGCCATTGATAAGGTGATTAACAAAATTCTTCTTTTAGTTCCAGAAATATAAATAATCTATTATTTAAAATCCAGGGGGTAGAAATACCAAATAAAATATAATTTTAAATATTGTTAAATAGTTTGATTAGGTAATTTTCTAAAAGATCACGTCTTGTTATGTAATCATTTAAAAATATTTTTC…	0.311111111111111
86_SCN1A	ATCCTCCATGCAGACTCACAC	59.79	TGTTGGTTGCATTGCTTTCCA	59.52	922	86	chr2:166908949+166909870	SCN1A	New #86. Via Primer-BLAST.	2	2	166052439	166053360	922	99.7% (1 x 2)	ATCCTCCATGCAGACTCACACTATTCTTTATTGTCTTATTCCCTTCTCTTTTGTTAGCAAAAAACTTAGAAGATTTGCATTGTATACACATAGTCATTAATGACTCTAATGAATAAGAAATTACAGATTGGTACATTTAAAAGGGAGCAAATTCTCGATAAAACTAACATGGTGAAAAAAAAAAAAACCCATGATATTTGTAAGTGCAGGTCACCTTGACCTCAAATTACAGTATCTCACATAAGACATTGTTAAACTCCAAGGCTGATAAAGCTTATGTCTAAACAATAAGAATCATTTTCTTTGAAACACCTAGTCTTATGATTCCTGATTTTCTGTAAAACTGAATGTCAAGCAGAGAAGGATGCTGAATCACATGATGGGTCCGTCTCATTATCT…	0.349240780911063
87_SCN1A	ACATCACAACTGTTAGAGGCCA	59.628	CGATTTCACTGTCATTACATTTGCG	59.774	918	87	chr2:166910254+166911171	SCN1A		2	2	166053744	166054661	918	99.8% (1 x 2)	ACATCACAACTGTTAGAGGCCAAAAAATCAGCTCCTGAAGGAAGGATGAGGGTAAGTGTTGTTGGGCTGCCTCCTTCTACACTCTACTTTCACTTAGTCTGGAATGGTTTTCTATTATTTTTCTGGGTCTCTTCCTGAGGAAGTTTGCCACTAGAAAAAAAAGCATTGGGGTGCATAAACTGTGCATATTACTGAGTGGATATGAATAGGAGATAAGGATAAGGAAGTTTATGTTCAGACTAAAGAGATGAAGAGAGCCATAAAAGGAAAGAAGAAAAGAAGAAAGAAAAGGGGTCAGGAGAGAAACAGAAAGAGGCAGAGAGAATGTATTCCTCTACAGGTCTTAGAAATCAGTAATTTAATATATTAAAAACATAATATTTCAAGTATCTTCTTTCT…	0.348583877995643
88_SCN1A	GCATACCAATTTCTTATCACTCCA	57.057	TGCCCACACTTCCTATTTGT	57.03	902	88	chr2:166911327+166912228	SCN1A		2	2	166054817	166055718	902	98% (1 x 2)	GCATACCAATTTCTTATCACTCCATCAGTGGAATAGATAAATACTAAAAAAGAAAACTAAGCAGATGGATTTTAATTTCATACAAATGAAACGTAGCCCTAAATTTAAATTCAGCTTCCTAACACAAAGAGTTGTTTCGTAAAGTGTCTTAAGAGTAGTGTGAGAAATACAAGGTATATGAAATCTATTTAGCCATTGTCTGAAATGTCTTGGTATTTATGTAAATATAGTCTCCTGAGAAATATTTAGTATGTTTACATGATGGAATAGCCAATCAATAATATTGCAGAAGCATGAAATGATTTTCTTTTAGGGAAAAAAATCTCAAGTTTAATAGTGTTCTAAGAATGAGAGGAAACTGACAAATTAGCACGTGTTTTTTTTTTTCTACAAGATAAT…	0.323725055432373
89_SCN1A	ACTATTTTTGTGCTACCTGGAGT	57.757	AAATTTGAACGGCCATTCTAATTTT	57.022	917	89	chr2:166913323+166914239	SCN1A		2	2	166056813	166057729	917	99.2% (1 x 2)	ACTATTTTTGTGCTACCTGGAGTTGCACAGTTTTTCAGCAGAAAGTATTGACTTGAGCTCATTCAGGTGAATAAACTAGTAAATTGTTGAGGAAGGCCACTTATCTGCAATATTGTAATTTCTTAAACACATCTTATCCAACACAGTTCAACGCATGAAAACAATTTGTAGTCAAAGTACAGCACGATGCTAATTGTTGGGTTGCTCTATTTTGACTGAGTTTATACAAGTGCAGCAGGATTCGATAACATTAAAAGTGAATATTCTTGAAGGTTGACACTTAACATGATGGGAATGTAATTAAAATTCAACATAGCAAAGTGATGTTGGCCAAGAGACTCAACCTCTCTGTGCCATTGCCTTGTATCTCTTCCTACTTCTCTACAATGGAGCTAATAA…	0.329334787350055
90_SCN1A	AGTCTGTAAGACAGGAACACAACA	59.84	AAAGGCTTTCTCCCTGGCTC	59.96	920	90	chr2:166915196+166916115	SCN1A	Via Primer-BLAST.	2	2	166058686	166059605	920	99.6% (1 x 2)	AGTCTGTAAGACAGGAACACAACATAGAAGTATGAAAGTATAAACCACTTAAACTCTGTTATCTACTTTCTGTTACTTGTCATAATAAATTATTGTAAAGTTAAATGAGAAACCAGCACAATCACAATTTCTAAAGTGCCCCATGAAAACAAACTGTCACTGGATCTCTTCTTAATTAGAGAGGAAATCCAATGATACCACTTACCTTTTACCTAATACTTACCCTCAATTTTATTGTACATAAGACAATTAGCCAAGAGAAGTCATTTATTTTCTCGATATTTTAAGTGTCTGAGTTAAATGAAAGTCTTAAATGGGTGCACATTTCATTTCATTCCAAAAAACTTAAGGCACTACATGCTTTTTATAGTCATTTCAGCTTTCCCAATTCAAATATCT…	0.346739130434783
91_SCN1A	ACAGAGTTTGAGAAGCACTGCT	60.159	CCAGCCCATGATTTAGGCCA	60.106	915	91	chr2:166916660+166917574	SCN1A		2	2	166060150	166061064	915	99.7% (1 x 2)	ACAGAGTTTGAGAAGCACTGCTCCAAGTCTCACCTCTGCCTGCATTCCCTCTATCATCTTTGAAGGAGTATGAGTCCAGAAAACAGATAGAGCTTTACCACAAAGCGCATTTGAAGGAAGGGAGAATTTCACCTGTGCTTACTAGAAGAACAATCCCCTATGCCAACAATACTTAGCCCTCTTTTTCTCTGATTCATTGAGGGATTCTGTCCCTGAATGACATTGTGAGATCATCGTAAATCTGAACAGACTTGTGCAATGCAAATGCCTTTGCTGTGGGGGAATATGAGCATGTAACGACACAGAAAGGCCCAAAGTGAGCTAGCTCAGGAATAAATATGGTCCACCTTTCAAATGTACTGCATATACTTCCTTTCCCCCCAGATATGCTGAGTAAAA…	0.436065573770492
92_SCN1A	AGACCTAAACTTAAACCATCCATTG	57.297	AGGAAAGTGCAATAAATTTGGAGTC	58.308	890	92	chr2:166920444+166921333	SCN1A		2	2	166063934	166064823	890	99.1% (1 x 2)	AGACCTAAACTTAAACCATCCATTGTTCAGCAAGCTCATACCTTCTTCAGCAATCCTTGCCATGTAAAAATCATTTCTGGTTTTAAAGAAAAAGCAAGAAGGAAGTTATATAGAAAAATTGGTAATAACCCTGGTAATTAACAGTTTAATAATCTGGGAAGCAACATTATGAAAATATAAGTATGATTTGTTTTATCTTATGTTAAGGGTGCAAACTCTGAAATTAGATTTCTGATTCAAAAGCTAACTTTGCTGCCTTCCAGCAGTGTGATCCGGAACAGGTTTCTTAACTTTCTGTGACTCAGTTATCTCACTTGAAAACAGAATAAATGTACTTAGCTCATAGAGGTAATGTGATTCCAATTTAGCTGGTCAGATTTTGATACCTAGTTTTTATAC…	0.312359550561798
93_SCN1A	TCACCATCTTGGGACTGTTTC	57.86	TTCATATCATGTTAGCTCTGACTCA	57.648	890	93	chr2:166924827+166925716	SCN1A		2	2	166068317	166069206	890	99.1% (1 x 2)	TCACCATCTTGGGACTGTTTCTGAGACAGAGACAGGGAGGTGACAAAGGAAAAAGAAGCACAAGGAAGAAATAGTGCATAGGGAAGAGAAAGATTGGGAAGTCAACTACAGGGTCCTGGATGTAAGGGAGAGTCTGGGTGACTTTTAGTTTTACAGGAGCTGATGATAAGCAAAGAACAGCTACACACTGGGGACTGCCCATATGACAATTCGTGAAATTATAAGCTTTTAATAATCATCCTCTTTTCTGATTTCCCGTTAATTACTTTTGCAAGAAAAACTCCATAATTCCAATTAAAAACAAAACAAACTCTCTCCACCCAATTTAACAACTAAAAACTCCTTTGGCAGTGATAGACCAAACATGAATTTGAAATCACAAATTCATATATGACTTCT…	0.359550561797753
94_SCN1A	TGGAAAATATACTCTCAGCAGTGAC	58.659	CCAAGGTAAGGTATACTCATGGCT	59.652	880	94	hr2:166925996+166926875	SCN1A		2	2	166069486	166070365	880	99.6% (1 x 2)	TGGAAAATATACTCTCAGCAGTGACATTTTAATAAGCTCACTGACACTGCCTTTGTAAAAGATTACAGAGAGCTTCAGTGTGGTGGTTGTGTTTTTTCTATTCACATAAATTCCTTGCATGTACACTACTGCACTTTAACATAAAATATAACATAAGGAATGGATTCTGCAAATATTTTTACAATTGGCTTGTTTTGTCTATTCCATATAGTTGAGAAAGAAACCAGAGTCTTTGTATACTGATGCAAATGACACATTAACTATTGTACTAGAGTCCAACTTTAGGGAAATCACTAGTCTAACTGCATATTCCATTTCACTCAGGCAAATCTAATCCACACCCCCAGTATCAGCATTAGTGGAAAATCTCGTCCTAATAAACATTTTCCCTGGTGACAT…	0.339772727272727
95_SCN1A	AGTGTTTTCAGTGTGCAAATCCT	59.299	TGTTTCTCTTTCCCCTGCAGT	59.505	918	95	chr2:166941212+166942129	SCN1A		2	2	166084702	166085619	918	99.7% (1 x 2)	AGTGTTTTCAGTGTGCAAATCCTTTCAGGACTCATGGTTGTATGGCAGACGCACCTGACAGCAATAATTTAAGGGTACCCTGAGAATGACTCTGTGGTCTAAAAAGAATGTGTGTTTGGAAGTCTGAGGTAAGAAATCTGGCTGGAAGTGGCCAACCTGGAAATTTGCTCCTTATTATTAAGGATTTCCAAAGCCTGGTCCATTCCTCAGAATGTGGGCCATACAGTGGATGAAGCCCTTTGTTTGGATTAAATGAATGTTGCTAGGTGGAGAGTGCTAAGTGAAAATGCTATATAAACTGCATGCTTTTTACAAACATTAGTGGTTCTCCCATCCAGCCCACTGCCACTGGACCACCCCTGTATATGAGTCCTAGATAAATCCTATGTCTCCCTTGCT…	0.418300653594771
96_SCN1A	GCTCTCCTTTCCAAATTTATGAACC	58.667	CTATTGAGGGCCTCAGGTGAC	59.86	919	96	chr2:166943186+166944104	SCN1A		2	2	166086676	166087594	919	99.7% (1 x 2)	GCTCTCCTTTCCAAATTTATGAACCTCATCATTCTTCAGGTGATAATCATATAAACGTCTACTTAAGTTTGCTTTCAGTCTGTCATGTGAATTCAGTCATTCTCACTATATTCCTTTTGTGGTATACTGGTCTGGGTTAAAGAGACCCTCTAGGGATTATTATACAGTTTCGTCTTGTTTGAGAGCTCAGCAGCTGATGATTATCACAGATTTGTATAGAGTGGACACTACCAGATGTCCAGCACATCTGTCACAGCAGATGTGACATTGAGCCAAGTCTATTTCTGTCTAGGTGTATGATACTTGGTGCTATACTTTGGATATGGTTTGTCGCCATCAAATCTCATGTTGAAATTTGATTCCTAATGTTGGAGGTGGGGCCTAATGGGAAGTGTTTGG…	0.465723612622416
97_SCN1A	TCTTAAGTGCTGAGAAAATTTTCCT	57.176	TTGAATTTCAGGAAGCAGGAAAA	57.132	901	97	chr2:166944999+166945899	SCN1A		2	2	166088489	166089389	901	98.5% (1 x 2)	TCTTAAGTGCTGAGAAAATTTTCCTTTTTGTTATCCTCAATAGCAGGTGGCAGCTGAAATTGTTCAATTATATGCTTTGTTAAAACCTTATAAATAATTTAAATACTATTATTACAGTCAGCTAAAGCCTATGCTCAAATTATATTTTCTTTTGTTTAAATTCCCAAATATATCTCACCTGCTACCCTACATTCACCCCCAGTAAAGTCCCAAAGCCCGTGGGCTAGGTAGGGCATTATTGTTTTAGAATGTTACCAAGTTGGCCTAGAAGAGTACTTGATTTGTTGCGACAACTGTTGTTGTTCTCTAGGTAGAGTGTTGCGTAAAGGAAACAGTGATGTCCAAAGGGGCTGGACTGGCAGATTGGAAGTAGGGAGACCCAAGGTCAGCATTATGACA…	0.382907880133185
98_SCN1A	ACCGTGTTAGCTAGGATGGT	58.138	CTGGGCACAACTTACTATCAACT	58.42	872	98	chr2:166950052+166950923	SCN1A		2	2	166093542	166094413	872	99.2% (1 x 2)	ACCGTGTTAGCTAGGATGGTCTCAACCTCCTGACCTCACGATCCACCCGCCTCGGCCTCCCAAAGTGCTGGGATTACAGGCGTGAGCCACCATGCATGGCCTGAATTCTTATAATAAATAAACCATTTTACTTATACCCGCTTAAATGTGCCTTTATGTTTTGAATACAAGTGTTCTGACAAAAGCACAATGTAAAAACACTGAACATAACATGTTCTTAACTTTTGTTTTAAAACAAAAGAAAAAAATGGAGGTTCAGCAAAGTTAAATAGCACAAGTTAATAAAGTGATGACCATTGTCAGACAGTTTGGAGGAAGTTTGAGATTTAAATCCGGGTCTAATCTTTCACAGTTCAATGCTCTTGTTTTAAAACCAGAAATTCAGGCAGCAAGACTGAT…	0.361238532110092
99_SCN1A	AAAACCCTCAACAAATTAGGCCA	59.03	TGAACCAGCCTTGCATCCC	60.3	870	99	chr2:166954845+166955714	SCN1A	Via Primer-BLAST.	2	2	166098335	166099204	870	99.8% (1 x 2)	AAAACCCTCAACAAATTAGGCCAAAGCATAAGAGCCATCTATAACCAACTCACAGCCAACATCATACTGAGGAGGCAAAAGATGAAAGCATTCTCCCTAAGAACTGAAACGAAACAAGGGTGCTCACTCTTACCACTCCTACTCAACATAATGCTGGAAGTCCTAGCCAGAGCAACCAGGCAGGAGAAAGAAATAAAAGGCATCCAAATACGAAGAGAGGAAGTCAAACTATCTCTCTTTGAAAATGATATGATTTTATACCTAGAAAACAAAACCCCACAGTCTCTTCCCAAAGGCTCCTAGATCAAATAAACAACTTCAGGAAAGTTTCAGGATGAAAAATTAATGTACAAAAATCAGTAGCATTTCCATACACCAATAACATCCAAGCTGAGAGCC…	0.377011494252874
99_SCN1A	AAAACCCTCAACAAATTAGGCCA	59.03	TGAACCAGCCTTGCATCCC	60.3	870	99	chr2:166954845+166955714	SCN1A	Via Primer-BLAST.	2	3	12638968	12639079	112	99.8% (2 x 2)	ATGTTGAACCAGCCTTGCATCCCAGGGATGAAGCCAACTTGATCACGGTGGATAAGCTTTTGATGTGCTGCTGGATCAAGCTGCCTTCATCCTGGGATGCAAGGCTGGTTCA	0.508928571428571
99_SCN1A	AAAACCCTCAACAAATTAGGCCA	59.03	TGAACCAGCCTTGCATCCC	60.3	870	99	chr2:166954845+166955714	SCN1A	Via Primer-BLAST.	2	3	28416832	28417708	877	99.8% (2 x 2)	ATGTTGAACCAGCCTTGCATCCCAGGGATGAAGCCCACTTGATCATGGTGGATAAGCTTTTTGATGTGCTGCTGGATTCGGTTTGCCAGTATTTTATTGAGGATTTCTGCATCGATGTTCATCAAGGATATTGGTCTAAAATTCTCTTTTTTTGTTGTGTCTCTGTCAGGCTTTGGTATCAGGATGATGCTGGCCTCATAAAATGAGTTAGGCAGGATTCCCTCTCTTTTTTTTTTTTTTTTTGAAAAGGTCAACAAAATTGATAGACCGCTAGGAAGACTAATAAAGAAGAAAAGACAAAGGGGATATCACTGCTAGCAAGACAAATAAAGAAGAAAAGACAAAGGGGATATCACCACTGATCCCACAGAAATACAAACTACCATCAGAGAATACTAT…	0.387685290763968
99_SCN1A	AAAACCCTCAACAAATTAGGCCA	59.03	TGAACCAGCCTTGCATCCC	60.3	870	99	chr2:166954845+166955714	SCN1A	Via Primer-BLAST.	2	7	63469588	63470194	607	99.8% (2 x 2)	ATATTGAACCAGCCTTGCATCCCAGGGATGAAGCCCACTTGAAGAATCTAATAGATGCAATAAAAAATGATAAAGGGGATATCACCACCGATCCCACAGAAATACAAACTACCATCAGAGAATACTACAAACACCTCTATGCAAATAAACTAGAAAATCTAGAAGAAACGGATAAATTCCTCGACACATACACTCTCCCAAGACTAAACCAGGAAGAAGTTGAATCTCTGAATAGACCAATAACAGGATCTGAAATTGTGGCAATAATCAATAGCTTACCAACCAAAAAGAGTCCAGGACCAGATGGATTCACAGCTGAATTCTACCAGAGGTACAAGGAGGAACTGGTACCATTCCTTCTGAAACTATTCCAATTAATAGAAAAAGAGGAAATCCTCT…	0.387149917627677
101_SCN1A	AGGCAGAAGATTTGGGTAGATACT	59.03	TGTCAAGGCATTCTGATTCAAAC	57.87	876	101	chr2:166964647+166965522	SCN1A	Via Primer-BLAST.	2	2	166108137	166109012	876	99.3% (1 x 2)	AGGCAGAAGATTTGGGTAGATACTTGTCCAAAGAAGATAAATGACTAATCAACGAGCACATCAGATGCTCAACATCATTAATCATGAAGGAAATGCAAATAAAAAACCCAATGAGACATCACGTCACACACACTGGAATGACTATAATAATAATAAAAAAAACAGATAATCACAAGTGTTGGGAAGGATATAGAGAAACTGGAACCCTCATATATTGTTAGTAGGAATGTAAAATGGTACAGCCATTTGGAAATACACTGGCAGTGTCTTACAATGTTAAACATAGATTCATTATATGACCCAGTAATTTCATTCCTAGGTATCTAATCAAGGTAAATGAAAACATGTATCCATATGAAGACTTATATGGACATGTTCATAGCAGCCTTATTAACAATA…	0.33675799086758
102_SCN1A	TATTACCGCTGACTGACAATGTT	58.17	AAAAATGCTAACAGTCATCTGAGC	58.05	890	102	chr2:166967976+166968865	SCN1A	Via Primer-BLAST.	2	2	166111466	166112355	890	99.6% (1 x 2)	TATTACCGCTGACTGACAATGTTGCAAAGAGCTCTGATGGAGATGTACAAGGAGATTAATGTTATTTTCATGCCTGATAGCACAACACGCACTCTGCAGCTCATGGATTGAGGAATAATTTTTATTTTCAAGTCTTATTATTTAAGACATACATTTTATAAGACTATAGCTGCTATAGAGAGTGATTCCTCTGATGGATCTGAGCAAAGTAAATTGAAAATCATCTGGATAAAATTCACCATCCTAGATCCCATTAAGAACATTTGTAATTCATGGGAGGAGGTAAAAATATCCATATGAACAGGAGTTTGGAAGAAATCGATTCCAACTTTCATGGATGACTTTGAGGGGTACAAGATTCAGTGGAAGAAGTAACTGTAAATGTGGCAGAAATAGCAA…	0.368539325842697
103_SCN1A	AGCTAATCACCAATGGTCAATGATT	59.104	CACCCACCTTGCACCTACTA	59.019	915	103	chr2:166969338+166970252	SCN1A		2	2	166112828	166113742	915	99.8% (1 x 2)	AGCTAATCACCAATGGTCAATGATTTAATCAATTATGCCTACATAATGAGACCTCCATAAAAACTCTAAATTATGGAGTTTGGATAGCTTCTCCTACCCTATACTTTCTGCTATATGTCTCTTCCAGGCTGTTCCTTTACAATAAACTGGAAATAGTAAGCTCTTAAATTCTGTGAGCTGTTGTAGCACATTATTGAACTGGAGGATTTATAGCTGGTCAGTCAGAAGTTCCAGAGGCCTGGGTCTTGCAACTGATGTTTGAAGTGGGGCAGTTTTGTGAGACTGAGCCATTGACTTGTGGTATCTGAGGATAATGCCAAGTTATTATTGAATTGAATTGTGGGACACTCAACTGGCTGTCAGACAATTGAGTGGTGAGGGAAAAACAGAAACAAAAAC…	0.345355191256831
104_SCN1A	AGGTGAGGAAAGATGAAAGTCCT	59.09	AAAATGACTGAGAGACAAATTGTGA	57.43	900	104	chr2:166972801+166973700	SCN1A	Via Primer-BLAST.	2	2	166116291	166117190	900	99.5% (1 x 2)	AGGTGAGGAAAGATGAAAGTCCTAACAAGAGTATTAGAACATTTATATTTTATAATCCTCTGATTTGCTTTGCAACAATTTTTACTCACTTTATACAGAACTTACTGAACTAAACTGATATGTGCAGCTCATATTACAGTAATGAAAAATGTACTAACTTGTGTAATGTGACAAATATCTTCTCTATCCTGCATAATTCTGGGGGACTCAATTATCTGCATTATAATAATCTCAACTAATACAGTGCAACAAACTTAATCTGAATAATTTATCAGATAATCTGATAATTCATCAGATTCAGTGTCCCAGAATCTGATGAATTATCAAATTCATCAGATTCAGTGTCCCAGAATCTGATGAATTATCAAATTCATCCTTGTCATAATTTTTTTGTCTCAA…	0.288888888888889
105_SCN1A	CTCAAACTCCGGTACCTCAGA	58.832	TGAGGTAGGGGTTCAGCATT	58.331	886	105	chr2:166978330+166979215	SCN1A		2	2	166121820	166122705	886	99.6% (1 x 2)	CTCAAACTCCGGTACCTCAGAATGTGACTGTGTTAGGAGTTAGAGCCTTTGAAGAAGTGGTTTAGTGAAATGAGACTTTTAGGGTGAACCACAATCCAATATGACTTGTGTCCTTAAAAGAAGATGAAATTTAGACAGAAAAGAGACACCAGGAATGCACATGCACAGAGGAAAAGACAGACATCAGCAAGCCAAGGAGACGGGCTTTAGAAGACACCAAACTTCCCAGTACCTTGTTCTTGGACTTCGAGCCTCCAGAACTGTGATAAATACTGTTATTTAAGCCACCCTGTCTGTGGTACTTTGTCATGGTAGCCCAAGTTAACTAATACAGAAACCAACCCTATTTGAATGGCACACCTCTATCTCAAGTTCAGTAGTTTCCCCAATGGTATCTGT…	0.367945823927765
106_SCN1A	TTTTGGCATGTCAGAAAGCAGA	59.04	AAAATCTGGGGCTTGCTTGGT	60.76	900	106	chr2:166981132+166982031	SCN1A	Via Primer-BLAST.	2	2	166124622	166125521	900	99.8% (1 x 2)	TTTTGGCATGTCAGAAAGCAGATGAATTACAGCTCACATGTACGACTGCACCCAACTTCAGTCCTGAGTCTCTTGGCTAAGCTGTAGCTCTACCATCACATGGATGATGAGCAAACATCAAGAACACAGACGCCATGGCCACGGTGTGGCTGGACTGCTTGGATTCTGCCACTTACTAACTGTATAACCCAGCAAGTTAATTGAACCTCACTGTGCCTTGGTTTTGTCACCTGTAAAATTAACAATAGTATCTACCTCATAGGATTAAATGAGATCATATTTGCAAAGTACTGCTTAGGATAGTGGCTGGCACAGAGTAAATGCTATATGTTTTTGATAAATAAAACAATTAATAAATGGAAATCTAGGAATGTGGACAAAATTTAAAAGTTGGAAAAG…	0.434444444444444
107_SCN1A	AACATGGTCATTTGACAAGTTGA	57.149	ACGCTCTCTTTAATACCCAAAATC	57.321	900	107	chr2:166987144+166988043	SCN1A		2	2	166130634	166131533	900	99.2% (1 x 2)	AACATGGTCATTTGACAAGTTGAAAGCATTGAGCATAAGGAGATAAATGACTATTCTCATACAGACTCCTAGAAAAGGCCAATATCCCAAGCATGGCCCAAAGAGTACTATTAACTAACAACTCATCATTCTGTACACAGATACTTCATTCGTCAGAGCTGAAGCAGTTTTACAGTATTAGTAACTTTAAATCTTCCATGTTTCAGACTGAGCATAAAGGCAAAATATGAGATTTTTATTAAATTAGTGTAATATGCACTTAAAATCACATATTTATTTTTTAAAGTTAGCAGAAGATATTAAAACAAAACTCTGTGCTACCCTATGTCACTACTACACTTATCCCATTTGACCTTGTTCTAAGAGTTTTATATATGTATCTTATTTGGCTCCCAGAAT…	0.358888888888889
108_SCN1A	CTCTCTCTCTTTCTGGTAGTGGAGA	60.573	ACCTTAATTCTACCACAGACTTGGG	60.281	900	108	chr2:166989590+166990489	SCN1A		2	2	166133080	166133979	900	99.9% (1 x 2)	CTCTCTCTCTTTCTGGTAGTGGAGAAGAAAAAATAGTATAGGCTTTTCTTAACTCACCACAATGCAGTAATTAAAAGCAAAAGAGAAAGGAGGGAAGTTGTGGGATTATGATGGAGATAATCAGATTCCCCAGTTGCCCTCTGCCTTCCCTGCTATCGAGACAACGCACAGAAGCCAGAATTATGTCTGCAGGTGATTATTTCAGGGAAGCAGTTACTCCTTGTTGGAAGATTCACTGCAATTTCCTTTCAATTACATAGGCAGACATTGGTGTTGGAGAGGGAAATAACAATATTCCTAAACCAAATAAGTAGCTTTTATAAACAAGACAGAATAATACATGAACCTGATTTCTCAAAGGGAAATTAAGTATATGAATGTCAATCATCTGATGAGATT…	0.364444444444444
109_SCN1A	GACAGCTCCAGAAAATATCCAGG	58.867	CCGAAGATTGGAACTGCATACA	58.73	929	109	chr2:166991154+166992082	SCN1A		2	2	166134644	166135572	929	99.6% (1 x 2)	GACAGCTCCAGAAAATATCCAGGAAGCAAACTATCTTGAAGTTCTATACTTTCTTTGAAATGCCAAGATGTAATCTAAAAATATGTGTTCTACTTTTTTAGTCTAATAAACCACATTTATATGATGGTTATCTGTCATATGGGGAGACAAAATTCAACATTTCACATGCCTGAGCTTTATACCCCTCCTTTAAATGTATCAAGATTTCATAAAGCTTTGGTTCTTCAGAAAAGATCAAGGTACATCACAATATTTAAAGCATTATCTCCATATCTATTGCCACAGGAGGATAAAGAGAAAATAAACATAAATGCAAATAATGAAAATGCCTGAGCAATCATAAAGAATGAAGTTACTGTGTGGATTCTATTCTGTGTTTATGTGTTCTTTCCTTTGCTC…	0.335844994617869
110_SCN1A	GACACTTGATACATAAGGAAGCTCA	58.659	TCAAGTCCACTTTCCAGGGA	58.186	922	110	chr2:166992574+166993495	SCN1A		2	2	166136064	166136985	922	99.6% (1 x 2)	GACACTTGATACATAAGGAAGCTCAGAGACTAAAGTCCTTGTTTCCATGTTGCACTAGGTCTTTTTGAAAGTCTCTTTTACATTCTGATTGCTATCATGACATCAAAGTCACCTGTATTCCTCATCTTTGTGGGGAAGAGCAGGCTAAATAAAGTAGGTAAGGACACCTTCTGAGTCTGCACCCCTTTAATTGACACATAGGGGATGTGACCCCTGACGTTTCTGCTTCCCTTATTCTTTCTGCAACTAAGCAAACATAGAATGTGGATTTTCCCATGCTCTTAGCAAGGATGAAACTCAGCGATCATTTGCTCTACTTCACATGGTAGTTGTTTCTAAGATTACATATCATATATATGCATATATATATATGTTATGTTATGCTACACACACACAACT…	0.41648590021692
111_SCN1A	TTCCCTACTAGTGTACCACTTGG	58.908	TGAAAATGAACTAATACACTGGGCA	58.993	906	111	chr2:166995226+166996131	SCN1A		2	2	166138716	166139621	906	97.2% (1 x 2)	TTCCCTACTAGTGTACCACTTGGTGGAGCTATGAGAAGAGGGTCACCATCCTCCAGACCCCAGAATGGTAGATCCACTGACAGCTTGCACTGTGTTCCTGGAAAAGCCACACTTAATGCCAGCCTGTGAAAGCAACTAGGAGGGAGTCTGTACCCTGCAAAGCAACAGGTGTGGAGCTTCCCAAGACCATGGGAACCCACCTCTTGCATCAACGTGACTTGGATGTGAGACATGGAATCAAAGATCATTTTGGAGCTTAAAGATTTGACTGCCCTGCTGGATTTCAGACTTGCACAGGGTCTGTAGTTCCTCTGTTTTGGCCAATTTCTCCCATTTTGAATGGCTGTATTTGCCCAATGCCTGTACTCCCATTGTATCTAGGAGGTAACTAACTTGCTA…	0.455849889624724
112_SCN1A	CACTTGTGCAAATTTTCCTTTAAGA	57.231	CCATATCAGCAAGTGAAACAGTG	58.022	930	112	chr2:166998302+166999231	SCN1A		2	2	166141792	166142721	930	98.9% (1 x 2)	CACTTGTGCAAATTTTCCTTTAAGATCTAGTCTCAGGAAATGGATCTGTCAGGTGGAAGGGTATGTGCCTTTTAACCCAGTAGGTATCAATAGATTTCCCTCCAAAGGTGTGGCACCATTTTATATTCCAGAACAGCATAAGAAACTGTTTCCATCACCAGAAATTATCAAACTTTTTTCTTTGTTGACTGGGAAGTAGAATCTAGACTGTCTTAAACTTATCTAGGAATTTCTCTGAGGCATTTATGAGTAGACACAAAGAGGGTGGAGGAGAAAGAGGAGGTGCATTCTAAGAAGAGGAGATACATGTAGGATATATGTAAAGTTGGGTCTGTGGAAGTGGCTAGAGTCTGGAGAGGTAGGCAGACAGCCAGATCAGAAGGGCCTGGCACACCTGCT…	0.381720430107527
113_SCN1A	ATGGGAGTTCTCCTGCACAA	58.933	AACCTCCACATAAAGCCAAACA	58.428	909	113	chr2:166999386+167000294	SCN1A		2	2	166142876	166143784	909	99.5% (1 x 2)	ATGGGAGTTCTCCTGCACAAGCTCTCTTGCCTGCAGCCATGTAAGGCGTGTCTTTTCTTTTCCTTTGTCTTCTGCCATGATTATGAGGCCTTCCCAGTCATGTGGAACTGTGAGTCCATTAAACCTCTTTCCTTTATAAATTACCCAATCTTGGGTATGTCTTTATTACCAGCACAAAAACGGACTAATACACTCGTTGAATATAAAACAGAAAAAGGAATGCCACTTTATCAGAGAGCTATAATTTCATTTGAAACAAAACAAGAAAGATTTATTTTTTCAGAACTCAGCATTTTTTTTTTTTTTTTTGAGATGGAGTTTCGCTCTGTCGCCCAGGCTGGAGTGCGGTGGCAGGATCTCGGCTCACTGCAAGCTCCGCCTCCCGGGTTCAAGCCATTC…	0.419141914191419
114_SCN1A	CTTTAAGACTAAAGAGGGAAGTGAC	57.107	AGGCTCAAGGTCTCCAAATG	57.496	900	114	chr2:167000386+167001285	SCN1A		2	2	166143876	166144775	900	98.2% (1 x 2)	CTTTAAGACTAAAGAGGGAAGTGACTTTGTGATCCAGGTTTGTGACATTGTATTTTAAAGGAGGAATTTATATTTGATCTTGGGAACAATTTTTCACATTCAAAGTCTGAGAACATCTCCGTATCAAACCCAAAGAGATTTTCTCAAGTGAAATAAAGTGAAACAAAGAAAGTAGCATTAGCAGTTCCGAGTTGCAGACAGTTCTTTTTAAAATTTGTTTTTTGGTTCTTCCAGGCCTCATTTGCAAGTTGCTACTTAATTAACTAGGGTGGTTAATGTTAGGTAAAGTCCAAAATGTAAAGGAACTACATAGCAATAACAATATTTCAGTATTTCTTCAATAAAAGTTACTGACACTCTCTATATGTCAAGCACTGGAGGGTGCCAGTGAAAAGAGAT…	0.346666666666667
115_SCN1A	TCAGTGTGATTGGTTAGTCTAAGC	58.521	TGCAGTCTCCAGTTAGTCTTGA	58.769	915	115	chr2:167008311+167009225	SCN1A		2	2	166151801	166152715	915	99.6% (1 x 2)	TCAGTGTGATTGGTTAGTCTAAGCTGATTTGTATTCCTAAAGAGCAAAAAGTCTCCTCATTTTATATCTGAGCTTTCTATGGAAAAAAATTATCCTACTTTTAGAAGAGAATGTTACTTGGGAAACAGATGGGTTTATAACTATATTGTAGTCAGATAGATGTGAAGAGAAAACTGTAGACAGACTTTTCATAATGAAAAATGAAAATAATCCCATGCCCTATTTCATCTCACATTCACCCTACAAAATAAGGTTGTCTGAAGTTTTTTTCTGAAAAGATTCTCACTGGAAGAATAGATAGGCATTGAATTAAAGCTTCAACCTTTGGAATCTCTTCAATTACTAAGCAAAATTTTATCTCACTAATTTAGAAAGGAGGCCTTTAATGAGTTTTTTTTT…	0.349726775956284
116_Epilepsy	AAAATTTGCATACGTTTGGGGA	57.39	AGATCTTATGGTTTTATAAGGGGCT	57.59	872	116	chr3:167860974+167861845	Epilepsy	Via Primer-BLAST.	3	3	168143186	168144057	872	99.2% (1 x 2)	AAAATTTGCATACGTTTGGGGATACAAGTGTAGTTTAGTTATGCATATATATTGTGTAGTGCTGAAGTCTGGGCTTTTAGTGTAGCCATCACCTGAATAGGGTACATTGTATCCATTAAGTAATTTCTCATCCCTCATCCCCTTCCCACCTTCCCAGCCTTCCCCAGCCTCCAATGTCTATTATTCCACACTACGTCCATGTGTACACATTATCAGCTCCCACTTACAAGAGAGAACAAGCAGCATTTGACTTTGTTTTTGAGTTCTTTCACTTAAGATAATGGCCTCCAGTTTCATCCATGTTGCTGCAAAAGACATGATTTCATTCTTTCTTATGTCTTGGTAGCATTCCATGTGTATTAGTCCATTCTCCTGCTGCCACAAAGAACTGCCTGAGAC…	0.470183486238532
117_Epilepsy	GGTGTGGCCGGACTACAAG	60.376	GCATATGCACAGTAACCTTGATCC	60.024	917	117	chr4:176007757+176008673	Epilepsy		4	4	175086606	175087522	917	99.8% (1 x 2)	GGTGTGGCCGGACTACAAGGCTCTCTCACCCATCAGCTCCCAGTTTAAGGCAATGATTTTTTCTCCAGAAGGGGCCATCTTTCAGCATTTCTCATCCTTCCCACCTGTCTTGCATCAGCTCCAGGCAAGTATGGCTAAAAGGTCTGGCCTCTCTTTCTCCACCCAGGCCGCCATTCCCAAGGCAGAAACTCTAACCCTGGGCAAGCTGAGAATATTGGGCCATGATTGCTTCCACTCCAACTTGCTCACAGTTCAGTAGTTCCATGTTTAGCGAGGCAAACCTAGAAGCTATCACTTCCACACAGCTCCCTACTTACATAGCTGGAGTCTCATTTCAAAATAAGTGGTCAGCTGTCCTTGCCTCAGGTACCCAGAAATAACTTCTCTAGGGATCATTCC…	0.437295528898582
118_Epilepsy	TGTTTGAACTTACTGACCAAAATGA	57.602	AGAACTTACCATCCAACAGAGGA	58.832	924	118	chr1:186869607+186870530	Epilepsy		1	1	186900475	186901398	924	99.4% (1 x 2)	TGTTTGAACTTACTGACCAAAATGAACTTGTTATTTAAATACTAAATGTAGAGCTTATCAATGCAGTGATCATTTGTTTCAGGATAGTTCAGAATGTGCCAGTCACTCATGACTGAATATGTCAAATGTGGTTTGGGGTTATAGTGGCCCATTTTAAAGTGGGAAGGTCTAGAATCTTCAGAATTTAGAGTGTTTTGTGTAAGGAAAGTAGCCCGCTTCAAAAGAATCATGGAAATGCCTAGGCTTAGAAGCAACACAGATAAGATTATGCTTCTTTATTTCTCTGGATGAAATTAGTTTGTTTTGGCCAATACTTTGAGGAAAGTTGTCTCTAAGTTGACCTTGTGTTTTAGTTTGCCATCTGTATTTAGAAGTTGGTGTTAAAAATAGCCATTCCTC…	0.350649350649351
119_Epilepsy	TTTAAGCACAGAATTTGGTCTTCT	57.04	CCATGAATGTTCTGAAGCAAGT	57.221	917	119	chr1:200826305+200827221	Epilepsy		1	1	200857177	200858093	917	98.1% (1 x 2)	TTTAAGCACAGAATTTGGTCTTCTATTACAATATTTCAGCAGTGTAGGAACAATTACATCATTTTAAAATAGTAGTATTTCTGACTTAGGAATGTTATTTTTATTATTGTTGTTAAATCCCTACCATAGGACCAAAGCTCTACAAAGAACCCAGTGCAAAATCCAATAAGCACATAATACAAAATGCTTTAGCTCATTGCTGTTTGGCTGGAAAAGTAAATGAAGGTCAGAAGAAAAAAATACTGGAGGTAAGCATGTTTGCATGAAAATTAAATTTGGCAAACTGTAGAAGTCTTTTATCCATTCAAGAGAATGTACTCTCATGGGCCTAGACTTTCAACAGCATGTAAAAAGATCTGTAGCTAGATGTTTTAATTATCAGATTTAGTTTATTTTCAC…	0.327153762268266
120_Epilepsy	AAATGGAGAGCAGTAAGTGAATTAG	57.144	TGCCCACAATTGAGAAGGAT	57.095	916	120	chr1:239969832+239970747	Epilepsy		1	1	239806532	239807447	916	98.7% (1 x 2)	AAATGGAGAGCAGTAAGTGAATTAGTAGGCCAGATGCATTAGGCCTGCATAGTTGCAAGTCACGTGGCTGGGAGTGTGGGGATGAGCCATACAGGCAGGGCTTCCTCTTGGAGACGAAAGTTACTGTGTTCGCTTTGAGAAACGCACATATTGTAGATATTGTAGAAAACATACACATACCTGCATGCTATCTCTGCTTTCTAAAAAAGAGGTACATTTTAACTTTTTAATTTCTTTTAGTTGTTCAGAATAGGCAATGCTGGCCAATAAGGAGAAATGCTGGAAGAAGAGATAGAGTATCTGGCAATACTAGGTGTACTTCCATTACCTTTCAAGGCGTAAAATTAATAAACTGTTCACAGAAGAATTCCAAAGAAGCGTACATTCTGTTTTGAGAGT…	0.353711790393013
121_NCASD	AAGCTCTTCATTTGATTCTAAAGCT	57.3	GACACACTGTCCCTTTAGTCC	57.958	916	121	chr2:149057941+149058856	Noncoding Autism		2	2	148300372	148301287	916	99.2% (1 x 2)	AAGCTCTTCATTTGATTCTAAAGCTACTTAAGATCCAATGCTATTCTCTCTTCTTTTCCTGCAGTGTCTTCCCTATCATCACTTGTTCCCTTTGCTTGACAAAGTCTTGCTTAACAAAAAGAAGAAAGAAAAAAAAAAACTAGACACAACTAAAATATTACCTTCCTTGAAAAGTTTTTCTCAATTTTGTCTGTATTCCTCAGCTAGTGGATATTTGTTATTCTTGGATAATTAGTATTAGAACTCTTTTTCTGGGTTTAGGGAGTACCCTACACTCTGAATCAGAGACATTTTCTATCTTACAGGCTTAAAATGCCAACTACTTACTCTCCCAGTCTCTGTTACACATTGGGCATGAGTCCATAAACAGGACTGCCAATCAGGCATACTCACCACAGA…	0.37882096069869
122_NCASD	AAAATGATATACCACACTAAAGCGT	57.141	CAAATCTATTCAGAGTGAGCAAACT	57.625	892	122	chr2:149060477+149061368	Noncoding Autism		2	2	148302908	148303799	892	99% (1 x 2)	AAAATGATATACCACACTAAAGCGTATATGTTTCATTATATCATATATACATTATATGTTATACATTATTATATATATTATATATATTTATTTGAAGAGCTATTCAAAAATAAAATTTGAAGATGTTATTTATATTTTTAGTTGGTCTCAGAAAGTGAAATAATGATTGCAGATTGCCAGATTGCTAATGGCCAGCAAAATAATTGGAGCTGCTATTGGTTTTTAATAAGTGGAACCTTCTGAATTTTAGCAAATCCAGCAAATCATTACAAAAGGCATTCAGTAGTAAATCAGACAAACAATTTGGTGTTTCGTTAATTAGTATATTCAAGCCATTTAAGCTTCTGAAGAATAAGGTTGCCCTGCCAGAAAATCTTTCCAAGCATACTTAAAAAAGCA…	0.31390134529148
123_NCASD	GTTTGCTCACTCTGAATAGATTTGT	57.861	CCACTCTGCTCCTTGGGTATA	58.601	915	123	chr2:149061345+149062259	Noncoding Autism		2	2	148303776	148304690	915	99.4% (1 x 2)	GTTTGCTCACTCTGAATAGATTTGTATATCTTTTTCTTTTTTTGTTATCAAAAATTATTTGTAAGAAAATATTTACTGGTATCAAATAAATCTAATTTTATTAGGTGTCAGAAACACTTGATGTGGACATTTTTAATAGAGATTAAAGCTCAAAAGAAACCTTTAAAGTAATGAGGGGGCAATAGAGTACAAATGACCTCAAAGCCTAACGCTGATGAACTGAGCCAACTTATAATGCCCTCATCAATCTCTCAGCTGATATTCCAGGACTCAGAGATTTTCCACAGCCATATATCCACACTGCAGATCTCCCCGATTCCTAGGAGTCTGAAATCTCAGGAAAGATGAGAGTCAATGTAAGTAGTAATAATAATAATAGCAGCTAACACTTAAACAGTA…	0.355191256830601
124_NCASD	GAGAGTTTCTGTCAATCCTCCCT	59.48	AAATCTGTAGGCGTAATAGGTGGC	60.74	900	124	chr2:149062833+149063732	Noncoding Autism	Via online Primer3.	2	2	148305264	148306163	900	99.9% (1 x 2)	GAGAGTTTCTGTCAATCCTCCCTGTTGTTCAAAGGAAAGAAGAGTCAATCTTCTTTTCTTTAAATAATAAAAGTCCATTCCTCATTTGGTAGAGGATGTCTGCCGGATGGTATGAACAATCAGGCATTTAATGAGTGGCATTTCTATGAAACAGAAAAAGAAAAACCAAGATTAATGTCTACAAACCCAGTTTCTGTGTCCAGAGGGCAGCCAGTCAAGAAGATTTCTGGTTATTGGGCTCAAAGCATCTTTAAATGGTCGACTGAGGGTGAGAGAAGCAACCCCACACATTTCCTGGTTTGCAGTTTGAATGTGTTTAGCGATGACATCGGGTGAACTTTCTGAGGGGCCCAAACAGCAGCAGGCATGATGTCGCCTGCACACAATCTGTTATGGTAA…	0.384444444444444
125_NCASD	GCCAAAGCAGAAGGATGGGA	60.324	ATTGCTGGTTCTTTGTTGTTTTGT	58.755	924	125	chr2:149063311+149064234	Noncoding Autism		2	2	148305742	148306665	924	99.7% (1 x 2)	GCCAAAGCAGAAGGATGGGAGAAAAAATTAGAATGTTAGTTTGGACAGTTGTAGCCAGATATCAAAGGAAACTAGAGGAATTCTGGATCCCGTCCAGTTTACAAGTATATAATGAAACCTCAAAGACAGTGAACAGAGCTAGAATCTAATAACAGGTCCACTATAGTTTTCCAGTGAAACAAAATTTTTTACAATCTCCCCCCTTTTTAATTTTTTATTACAAAATAAATCTAGTGTCATTAGATTTGACCTGATTATTTAAATAAGCATGGCAAGAATGGTAATTGATCACATAGGCTTTTAAAATTTGCTTTGTTTGAACTTTTCATAAGGAATCTCAGATTAAACTTTTAAAACCCAGGCTAGGATAGCAAGCCAAGAACTCACCACCAGATTTTG…	0.33982683982684
126_NCASD	GACAAGTCTGGGCAATATGGC	59.322	ACGTGCTGAGTTAGACAACCA	59.589	920	126	chr2:166257542+166258461	Noncoding Autism		2	2	165401032	165401951	920	99.7% (1 x 2)	GACAAGTCTGGGCAATATGGCAAAACTCCATCTCTACAAAAATTAGCCAGTTATAGTGGTGGGGGCCTGTGGTTCCAGCTACTTGGGAGGCTGTGGCGGGAGGATTCCTTGAGCCCAGGAGGTTGAGACTTCAATGAGCCTTGTTCCTGCCACTACACTCCAGCCTGGGCAACAGACCAAGACCCTGTCTCAAAAAATAAATAAATAAAATAAAAATAGATTAAAGGTTACTGGGGGTGGGAGGACAGCCGAATAGGAAGTGCTTACTTAATGGTTATGGGATTTTTTCTGGAGTAATAAAAACGTGAAACTACAGAAAGCTTGTACTTGCACATGTGGCTACAATAAATACTAATGAATTGTACACTTTAAAATGGTTATGTTATTTGAATTTCACAC…	0.375
127_NCASD	TGGTTGTCTAACTCAGCACGT	59.589	GGCCCGGGTAAGCTGTAC	59.811	915	127	chr2:166258441+166259355	Noncoding Autism		2	2	165401931	165402845	915	99.7% (1 x 2)	TGGTTGTCTAACTCAGCACGTGTCTTAAATTCTGTCTCTAATTCAGAAATAATTCATCACTTAGTAAAGCTACATTTCTTGAAGGTGCATCAGGAATAAAATAATTAACTCATCATATACCAGAGATCCTGTGGCCAAGGGTTTTAAGAGAGTAACACAGGAAGTGTCGTGCATGCTCATGTGTGGAACACTTATTTTCAGCTCCAAATTCACACAATAAGTTATTCTCCCTACAAAGGGAATGTGTTTCTGCCACTGTTCACAACAAAATTGCAAATGTAACAGAAAAATTAGCCAAGGAAAACATAGTCCCTAAAGTAAATCTGATCCAAAACAATCTGATTAAATCCATAGAATTATAGCATTGTAAAGTCATTCTTGGGTTATTTATAAAGTCAG…	0.362841530054645
128_NCASD	TTTTGCTCTTCCTTGCTGAAAA	57.27	TGGTAACCAGTGATTCTCCTCAG	59.48	923	128	chr2:166262545+166263467	Noncoding Autism	Via online Primer3.	2	2	165406035	165406957	923	98.9% (1 x 2)	TTTTGCTCTTCCTTGCTGAAAAAAAAAACGTAACTTGCAGCAGGCTAGAGAGGATAATTTAAAACTAACTGTTTGTTTTGGTGTTTTGAGTTATTACCATATTTGGTATTTAGCCATTGGGATAACAATTAACAATATAACAGAAGCACATCCAGCCCACTGTGTTGCTGTGGGTCACAGGGGTCTGTCTCTGTTATTGCTTTGCTCTCAGTGTTAACAGCACTCCCTGTGGTTAGGGCTCAGCCTGACCCTACAAGTCTTTTTCTGACTGCTTGTAGCTCAACACAGAGGAGTGATTAAAATCTCCGCTTGTCACTCATCTCTTATGCCAAATTCAGTAGCGAAAGGTGGCAGCATATACTTAAACTGGCAATGAGCCCAAACTTCAGAGTCTGAGAT…	0.426868905742145
129_NCASD	AGGAGGAAGAGAGAAAGGAATGG	59.22	ACATTTCCACATAAATACCTTTGCC	58.36	920	129	chr2:166266510+166267429	Noncoding Autism		2	2	165410000	165410919	920	99.6% (1 x 2)	AGGAGGAAGAGAGAAAGGAATGGACATGGAAATGGGTACACTAAACTTCTTCAAAAGATTAGCTAAAGGAAAGACTATGGATGGATACAGGATTTAGAGTTGTGAAAACTGGATGTCTTTACTTGTTGCGTTTAAAATTTTAATAATAAGCAATTCTGTTTAGATATTAACTTTACATTTTTTTCTTGTAAGTGAAAACAAAAGAATACAGATGAACAAACAGACAACAACTCTCTACATTGAGGTTCTGATTTTGTACAAAAGTATTGAAAGATGAAGGGATTAAAATTCAATATTCAAGAAATTTTGGAGTTTAAAAAATGGTGTTCTCTTTGGAAAGTTATCTACTTAGGTAATTGTTAAAACTACTTAAGTGGAAACAGAAAGCTGCATCATTGT…	0.327173913043478
130_NCASD	CCTCTGCTTCCTGAGTTCAA	57.153	AACAGTTAGGTACACCTTTTTACAG	57.203	903	130	chr2:166276375+166277277	Noncoding Autism		2	2	165419865	165420767	903	98.1% (1 x 2)	CCTCTGCTTCCTGAGTTCAAGAAATTCTCCCACCTCAGCCTCCCAAGTAGCTGGGACTATAGGCGCCCACAACCATGACCGGCTAATTTTTATATTTTTAGTAGAGATGCCATTTCACCATGATCACCACGCTGGTTCTCAAACTCCTGGCCTCAAGTGATCCACTCACCTAGCCTCTTAAAGTGCTGGGATTGCAGGTGTGAGCCACTGTGCCCAGCCATGAATACAGTAGTTTTTAAACCCATAATATTGGCAAAAATAAAAAGATTTTATAGTATCTAGTCTAGTATCAGTGTGGGAAAATCACTTTTTTTTTAAACATGGTTCCTGTAAATTGAAACAACAAATTGGGATGGCAATTTCACAATATTTATGACATTTTAAATCAACATATCCCCT…	0.356589147286822
131_NCASD	CTCACATCCAACACAGGGGA	59.308	TGATTACCTATTTAGCTCCAACCCT	59.33	917	131	chr2:166280830+166281746	Noncoding Autism		2	2	165424320	165425236	917	99.7% (1 x 2)	CTCACATCCAACACAGGGGATTACAATTCAACATGAGATTTGGTGGGGACACAGATCCAAACCATATTATAAATCTAATAAGAAGTTAGCCAAAAACAGTAGAAATTTTGAAGAATATACAAGTATTATTTAATTTATCCTTTTTATTTTCCAGTTTATATATGCTTTATAATATACACAATATAGTAGTATATTAGTAGACTATAATTAAGTAGATGTGTGTAATATGAATGTGTTTAGTAGTTAACTGATATTGTTTATAATGAAGCAACTTCTAAGCCATTAGTCTATAAGTTTTATGAGCTTGTTTGTTCATATTTATCACTTAGTACCTAGCAATTAAGTCATGTACAGAATCTCTCAAAGCCAGGCCAGATGCTGTTTTCTTTATTGTATACC…	0.341330425299891
132_NCASD	TTTGCAAATCTCTTTAATGTCAGCC	58.84	ACACCAGTTAGAATGGCAATCA	57.97	910	132	chr2:166284981+166285890	Noncoding Autism	Via online Primer3.	2	2	165428471	165429380	910	99.3% (1 x 2)	TTTGCAAATCTCTTTAATGTCAGCCTTAATAGAAGACAGTTGGATTCTCATACCAGTTTCTGGATTTAAAGTGTTGAAATATGTTGTTCTAGTTGAATTATATTAATAAAAATTATCTCACATTGATATGTAGTTGAAAAAGTGAGAAATATGTTAATAACCTTTGTAGATTATTGTGAATATTATTTTATTACTATTACAAAAATTGACAAGGGTAGTTTTTTTTAAAGGTTAGCTGCAATGTGAAATTTGAAATTATATCAATGAAATCTTTGCACTCTGCTACATTAAAATCTTTTCGTCTCTCTTGCACTTTGAACACATATTTTACAATGCATTGTTTTGTAACATCATGCTTCGTCATTTAGAAAATATTCATTCATTGAGTTAAATGAATGT…	0.312087912087912
132_NCASD	TTTGCAAATCTCTTTAATGTCAGCC	58.84	ACACCAGTTAGAATGGCAATCA	57.97	910	132	chr2:166284981+166285890	Noncoding Autism	Via online Primer3.	2	8	76365445	76366110	666	99% (2 x 2)	CTCACACCAGTTAGAATGGCAATCATTAAAAAGTCAGGAAACAACAGGTGCTGGAGAGGATGTGGAGAAATAGGAACACTTTTACACTGTTGGTGGGACTGTAAACTAGTTCAACCATTGTGGAAGTCGGTGTGGCGATTCCTCAGGGATCTAGAACTAGAAATACCATTTGACCCAGCCATCCCATTACTGGGTATATACCCAAAGGACTATAAATCATGCTGCTATAAAGACACATGCACACGTATGTTTATTGTGGCACTATTCACAATAGCAAAGACTTGGAACCAACCCAAATGTCCAACAATGGTTGACTGGAGTAAGAAAATGTGGCACATATAAACCACGGAATACTATGCAGCCATAAAAATTGATGGGTTGGTTCCAAGTCTTTGCTAT…	0.414414414414414
132_NCASD	TTTGCAAATCTCTTTAATGTCAGCC	58.84	ACACCAGTTAGAATGGCAATCA	57.97	910	132	chr2:166284981+166285890	Noncoding Autism	Via online Primer3.	2	11	99783277	99784776	1500	99% (2 x 2)	CTCACACCAGTTAGAATGGCAATCATTAAAAAGTCAGGAAACAACAGGTGCTGGAGAGGATGTGGAGAAATAGGAACACTTTTACACTGTTGGTGGGACTGTAAACTAGTTCAACCATTGTGGAAGTCAGTGTGGCGATTCCTCAGGGATCTAGAACTAGAAATACCATTTGACCCAGCCATCCCATTACTGGGTATATACCCAAAGGACTATAAATCATGCTGCTATAAAGACACATGCACACGTATGTTTATTGTGGCATTATTCACAATAGCAAAGACTTGGAACCAACCCAAATGTCCAACAATGATAGACTGGATTAAGAAAATGTGGCACATATACACCATGGAATACTATGCAGCCATAAAAAAGGATGAGTTCATGTCCTTTGTAGGGACA…	0.413333333333333
132_NCASD	TTTGCAAATCTCTTTAATGTCAGCC	58.84	ACACCAGTTAGAATGGCAATCA	57.97	910	132	chr2:166284981+166285890	Noncoding Autism	Via online Primer3.	2	23	52728453	52729970	1518	99% (2 x 2)	CTCACACCAGTTAGAATGGCAATCATTAAAAAGTCAGGAAACAACAGGTGCTGGAGAGGATGTGGAGAAATAGGAACACTTTTACACTGTTGGTGGGACTGGAAACTAGTTCAACCATTGTGGAAGTCAGTGCGGCAGTTCCTCAGGGATCTAGAACTAGAAATACCGTTTGACCCAGCCATCCCATTACTGGGTATATACCCAAAGGATTATAAATCATGCTGCTATAAAGACACATGCACACGTATGTTTATTGTGGCACTATTCACAATAGCAAAGAGTTGGAACCAACCCAAATGTCCAACAATGATAGACTGGATTAAGAAAATGTGGCATATATACACCATGGAATACTATGCAGCCATAAAAAATGATGAGTTCATGTCCTTTGTAGGGACA…	0.424901185770751
133_NCASD	TCACTTTGAGAACCACTGATCAA	57.965	ATTTGCATATGGGGAAGAGTGA	57.475	915	133	chr2:166287844+166288758	Noncoding Autism		2	2	165431334	165432248	915	99.1% (1 x 2)	TCACTTTGAGAACCACTGATCAAATAGAAACCCCTATTGCTTAGTTGTGCTTACACTAGAATAGAGCTTTTTGGGGTCAGGGATTTTATCTTTTCATCATTTTATTTAAAAAGCCTAGAAAGGCGTTCAGTTCAAAAAGTGCAATATAAATATGTAATGAACACATCAATTTAATGCTCACTATATTTGAAGCTTATTCTGTACTGTTTTGCTTTTAGTCTTCCCCTAGTAAGTGTCTATTAGCCAAAGTGGCTGATAAAAAAAGCAAAAAACAACTGAAAAAAACCCAGACTATATAAAGTATGCCTCTTAGAAGGCTTCCCTCTGCATGTGGAGATATCCTAAAAAAATACGTAGTCATAAGAAATTGGCTCTAATTCCACAGGGACACTAATCTTC…	0.345355191256831
134_NCASD	TCAGACCCCACTCCAACCTA	59.51	TGCTTTCATTTGTAAGTGACCAAGA	59.408	870	134	chr2:166296615+166297484	Noncoding Autism		2	2	165440105	165440974	870	99.9% (1 x 2)	TCAGACCCCACTCCAACCTACTTTGGAGGTAGGGCCCAGGAATCTGTGTTTTAACAAACCCTGGCATAAGCTTCAGTTTGAGACAATTGGTTTGGGTCAAATAGTGAAAATAATTGCTCTGCTTTGGAGAGGGGGGTACCAAGAGAGAGTTTATAATAAATAATTTCATGTTTAAGAACTAAATTCCTCAATAGATGCAATACTGGCAATGAAAAAAGTCACCTTTTCTCTGTGTGTTTTCCTTTATGTTGTGTGCTGCAGATGTTGGCAAGAATAGCAACATTTTACATGTTTGCAGTAAGAGAGTCTGAGATCAAAACTGAGGAAATCTTTTAAGGTTAAATTCTCTCAAATACTTCCTTCCAAAGACCTTGTGCCAGCTTGTGATTTCCAGGCAGA…	0.35632183908046
135_NCASD	CCAGAGGGTTATAGTTCTTAGAGTT	57.337	TCTACTCAAGAAATCAAGTGGTTTG	57.503	896	135	chr2:166304135+166305030	Noncoding Autism		2	2	165447625	165448520	896	99.1% (1 x 2)	CCAGAGGGTTATAGTTCTTAGAGTTTATTTCTTTATGTTTACCAACACAATCACCCCTCAAGGTGTTGGGTTAGTATTGTTTTCAGAAAGTGCCACCTCATGGACTCAGAATCCTCATCCTCTACTTTTTCCTCATTGTCTACTTTGATAGCTAATTTTTTGACCCTGAAAGCATCAAAATTTTTATTATCCTTATCTACAGGACAACTTGCCATGTACTTGCTCCTCCAAGGGAGACTAACTCCAGGGATTCCATGGTAATTTTCTGTCTTAATATTTAGAGTTGCCACTTATCACTCTAAAGTTAAGAGAAAATATGGATACATAGATTTATTTACATTTGAGTTCTGAGCAATTCCATAATTTGCATTTAATCCCCTGAGCACCTTCAGATAGAGG…	0.353794642857143
136_NCASD	ATTAGTCTATCTGCCTGAAACCA	57.04	TAAGTTAACGTTTGTGTGTGTGT	57.14	900	136	chr2:166306356+166307255	Noncoding Autism	Via online Primer3.	2	2	165449846	165450745	900	98.5% (1 x 2)	ATTAGTCTATCTGCCTGAAACCAAAAGATTAAGGGCCCCTATTTGCCCCTCTCAGGAATAGTTGACTATTCCTCAAAACTGAAGCGTATTAGTGGGGATAGTGTTGGTCTTTAACCTGTTGGCTGACTATAGATACTGACTTCCTAACTCTCTTAAGCCTTAGCAACTATGATGTTACCTTATTATTTACTAACAGATGAAAAGCTAGGTGAATCATAATCCAAAATCTGAGGCTCTACCATTGTTTTCCAGAGAAAAAAGTGTGTGTTATTTACATGGCACACAGAAAAGCTCTCTCTTGCCAAGGTGCACAAAATAAGGACTCTCATATGCATATGCACAGCTCAAATACTGCCTTCTTTAGGTTGGGGAAACATGCATGCTTTGTAAAGGAACAGG…	0.355555555555556
137_NCASD	AGTGTCATTGGAATTAAATGAGCTC	57.907	AAGGTGGATAAATTTTGAGAAGCAA	57.698	918	137	chr2:166307900+166308817	Noncoding Autism		2	2	165451390	165452307	918	99.5% (1 x 2)	AGTGTCATTGGAATTAAATGAGCTCATGCCTTTAAAGTTCTTGTTCATAAATGCACCAGGAGTTTATTTCTTATTCTATAAATGCATCTTTCCCTTTTTCAGAAATATAATTCATGATCACTCCCATCAGTTGAGTGAATGAGTAAATAATACACGATTAACTCTGGAAAATGCTTAAACATATTTTATCTAACTGCACAGCAATGAGTAAACAATACTGCTGCTGTTATTTCTATGTGGCTTTTATCAATATGCTTTTGATCTGTTTGCTATAAGCACTATACATCCTTATGATTTTTCTCTTTCTCTGACATTTTTTCCCTCTGTCTTTTAATTCTTTCCTACTTGGCAACCTAATGAAATCATTAAGACCATCATGAAATAGGTCCTATTGGGTTA…	0.337690631808279
138_NCASD	CCCCATTCCTTTCTTTCCTTCT	57.95	TCACATGACTTAACCCAGACTG	57.73	904	138	chr2:166308979+166309882	Noncoding Autism	Via online Primer3.	2	2	165452469	165453372	904	99.2% (1 x 2)	CCCCATTCCTTTCTTTCCTTCTTTCTTACTTTTCCCCCCAGGTTGGTTTCTTTGAATGTTTCCAGAAGAAGTTATTAGGTGGCAACTTTCATCTAAGCCTTCAGTGCTCAGCATTTCTGCTTTTACCTTGGGCACTGTGCACATTGTGGCACCCAAGCTGTTGTACTATTTTAAGCTTTACTTGCTCAAACTGCTTTGCTGTTCACTACTGCTGCAACATCAAGACCTAAAAATTTTAAAGAGAGGTCAACACAACCACATTGTTCCTTTATTCGGTGTTGTTTATGGAGTGTTTAATATGCACCAGTTACTACTTTTGTGATGAAATGCTCATTTCTATTATTAAAGTCTTACTATTAAGTGTATTTATTCTCACTTCTGGAAGAAGAAAATCTTTTT…	0.381637168141593
139_NCASD	ACAAACCATTACCACATGCTAACAA	59.7	TTGACACCAGCCATTTGTGC	59.61	912	139	chr2:166309453+166310364	Noncoding Autism	Via online Primer3.	2	2	165452943	165453854	912	99.7% (1 x 2)	ACAAACCATTACCACATGCTAACAATATTTCTACAGTGGAGGTGATACCAAGGACAGTAGCGGCAGAGGGAAAGGAGACCCTGAAGCTCAGTGTTTCTGAAAGAAAGGGGAAAGGCTTCAGAGTCCTATCTGAATTTCTGCAGCTAAGTGGAATTTTGCCAAGCTTTTCAGTGTAAAGGACTAGAAGAAAGAAAATGTATGAACACACGGGAGTGAGAGAGCATCACGTAATTACAAAGTAATAATGAGTTTAGAATTTCAGAAAACAAAGTTGTGGCAGGTGATAAGGCAGGGAAGGCATGCAGCTTTTGAGACATCCAGAGGGAAGTGCCTAGTTTGGCAATTTTTGAAAAGCAATCTAATTTCACAGAGGTAGATCAGATGACCCATCATAACCAA…	0.389254385964912
140_NCASD	ACGCACGTTGTTGAGACCAT	60.53	TCTTGGATTGAACATTCTGTGAGT	58.38	917	140	chr2:166309965+166310881	Noncoding Autism	Via online Primer3.	2	2	165453455	165454371	917	99.5% (1 x 2)	ACGCACGTTGTTGAGACCATTCAAACTATTTTTATGGAAATTAGTAGTCAGGAAAAACACACAAAAAAGGAGATAATCAATATGTATGTACAGAGATTTGGCTCCAGATAAACACCCATATGATAACATCAGGTCTACTCAGCACATTAGTGAAATTTGGCAAGATTAATGATTTTCTTAGCAACCTCCCCAGGAAATGAAGTTTGGCTGATGCAGTGCCATCTTAGGAAAGGCCAGATCTGCATATTATTAACATTTGTGTTGGTGGGTTCCCAAAAGTGGGTGTAGTTTGACCCAAAATGAGTGTTAGAATAAAAACCCCACTTGCTATAAGAGTGTGAAACCATCTGAGGGAAGCCAAAAATTAGACATTTCTTCAAGCACAAATGGCTGGTGTCA…	0.379498364231189
141_NCASD	AGTATTTGACCTCACTTTTGTCTTT	57.12	ACTTTGGCTGCCTCTTAGAAT	57.27	893	141	chr2:166318774+166319666	Noncoding Autism	High mispriming possibility. Via online Primer3.	2	2	165462264	165463156	893	98.6% (1 x 2)	AGTATTTGACCTCACTTTTGTCTTTAATATAAATAAATTTAAATGGCTACAATTTCTTGCTATTATCATCCCAAATTTGTTACATAATTATCTATTTATTGAAAAGGAAAGAGTGCCTACCCATAATACTGTCTGGGAGAAATAGCTCCATAGGGGTTATGGCTCAGATCGACTTGGAGATAATGAAATGACGAAGCAGCTTTCATTTCTATCATTCACTCTGGGATGACTACAGAAGAACAGGATGTGTAGTCCTGTAGTACCCATCATAAAGATTTACACAAATTGTTCCTTTCTTCCAGAGTGCTGTTACTTTCCTCAGTGTTACATACTGTCATTAAATTCTCCACCCTCACTATTACAGCTTCCATTACCACCCACATGGCACTACGGCTTTAT…	0.384098544232923
142_NCASD	TGGCTCTGTTACCTAACCAAAA	57.559	CAAGTGATCATTGGAATTAAGGGGT	59.342	915	142	chr2:166319324+166320238	Noncoding Autism		2	2	165462814	165463728	915	99.2% (1 x 2)	TGGCTCTGTTACCTAACCAAAAATCAGCAGGGATCTTAGAGGCTCATTGCATGTTTCCATGTTAGTTGGGCTCTCTCTCACTATCACCTGCCAAATTGTTTCCTATTAAGGAGTTTGGCATTATTTTGTTTTCCTCTACTTTTATTTATCTCAGAATATTCTGGACAGAGCATCATTAGATAGACGAGTACCAAAGGAAAGTATCAGTCTCAGGTCTGGTGTATGAGGCTGTTACTGCTTGTTTATTTCTAAGATCTATAGCTCATCTCCTTGCTCCAGGAGCTGGCATTACTCAGAGAGTTTGAAATTCTTATTCAATATAATTCTAAGAGGCAGCCAAAGTAAAGACAATATCAATTTATCTGTACAGTTCTGATTTACTCACGTGCTCTCTCTCTC…	0.347540983606557
143_NCASD	AGTCTCTTTGGACAGTTAGGTATGA	58.983	GAGCTGGTTCTAATGCAGAATCT	58.55	885	143	chr2:166321856+166322740	Noncoding Autism		2	2	165465346	165466230	885	99.7% (1 x 2)	AGTCTCTTTGGACAGTTAGGTATGAAAAATTTTTATTTAATCATTTGATCTGTGCCAAGCCTCATCTATTTCCTTAGTGGTCATTATATTATCCCAAAACCTTACCTCTACAGCTCAATGGAAGAAACTTCACTTAATTAATACATAACATATTGAAATCCCTTCCTATTACAACCTGCTCTAATTTTGGACTTTCTTAAAAGTTGTCCATTATGTTACTCTTTAGGCTTATTTCTATTTTCAGCTTTTAAAGAATATTTTATTATTTAATTTAGGGTATTTTAACCTTTAGAAATTTTGTAATATTTCTCTTGTTATGAAAGATTTTTAAAGTCACTCAGACACACTCTCAGACGGTCTATTACCTTTGCTTCAGGCAAACAAGGCAACATGCAGCTG…	0.388700564971751
144_NCASD	GTGAAGCAAACTAACATATCCATCA	57.68	GGACAACAGGTTTATGAAAATATGC	57.24	872	144	chr2:166323277+166324148	Noncoding Autism	High mispriming possibility. Via online Primer3.	2	2	165466767	165467638	872	98.4% (1 x 2)	GTGAAGCAAACTAACATATCCATCATTTCATATAGCTATACTTTTTTGTTGTTTTTGTGGTAAGAGTAGCTAACATCTACTTATTTTACATGAAACCCATAGTACAATTTCATTACCTGTAGTCCTCATGTTGTACATTAGATCTCTAGACTTGTTCATCATATATATATATATATACACACATATACACACACACATACATATATATATATATATATATGCTTCTTTGTATCCTCTGACCTACATCTTCCCATACCCCCAGTCCCTGCCTCTGGTAATCACTGTTTTGTTCTCTATCTCTATATATTTGATTTTTTTTTTTACAAAGATTCTGCATATAAGTGAGACCAGGCAATATTTCTGTGTCTGGATTATAGCACATAGCATAATGTCCTCCAG…	0.336009174311927
145_NCASD	AATCTGGTTAGAATTTGTGCCCTG	59.536	TTTCACTTCTGAACCTAGAGGCA	59.354	900	145	chr2:166324497+166325396	Noncoding Autism		2	2	165467987	165468886	900	99.8% (1 x 2)	AATCTGGTTAGAATTTGTGCCCTGCAAATACTTGCCTACAAGTCTCTGTCTACAATCACACTTGACATATAAATCACCTGGGAGAGCTTGCTAAAAATGCTGAGTCAGAAACTCCTCAAATGCTTATTCATTAAATCTGGAGGAGGCCCATGAACCTGCATTTTTAATGAATCTTCCCCTAGTGGTTCTGATGAAGATGGCCCCGAACAACTATTTCTAAAAATGCTGTCTGTCCTAGGGATTCCTCCAGTTATTCCTAGCAATAGGACCACAAAGGCTTTGAAAGCATTTTTCACAACAGAGGACTTGGCGGTGGGAATAAGCGATAGTTTAGTCTTCCCCATAATCTTTAGCAGAGCCTCCCAAAGCTACTCTAAATAACAGTGCAAACTAAGCAAA…	0.385555555555556
146_NCASD	AAACAGGCAATTTACCTAGGTTTT	57.259	AAAGAGTCTACAACCTGCAAAAAT	57.285	915	146	chr2:166325834+166326748	Noncoding Autism		2	2	165469324	165470238	915	99.3% (1 x 2)	AAACAGGCAATTTACCTAGGTTTTACTATGAGCATTTTGCTTTGATTTCAGGTAGGTGAGGCATTGATTAACTTTATTTTTCTAAATCCAAAGCAAGACTTTTTACTTCAGCTGAGGTCATCTGCAGACATTTTCCATAGTTGGGAGCTATTTTTTGAAATATCTTGCATCTCTGCTTTTCTCTCCATATTTCTTTTCTCCACTCGCTTCCTCTCTCCCAGCTGCAGGGATTCGTCCTCTAAAAGAGTGGAGGTGGGAGGGAACAAGAAATGGAAGCAAAGCAGGGAGCATGAGCTAGAGAATGCCAGGATCTGGCTTTTGTTATTGGTTGGCTGCCGCCTGATGGATAGACGAGGGAGGAGTGTACTCTCTTCAGTGTGTTCTGACGGAGCCGAAGTA…	0.369398907103825
147_NCASD	TGAGGAAGCTTTGCAATGAGC	59.457	TTTTAATGAGGTTCTACCACCGTT	58.377	901	147	chr2:166326392+166327292	Noncoding Autism		2	2	165469882	165470782	901	99.6% (1 x 2)	TGAGGAAGCTTTGCAATGAGCTTGCTGTTCTTTCTCTCTGCAAAATCCTTAGCTGATTAAAAACAAAACAAAACAATCACCAGAGGCATGTCTTATCCTAAATAACTTTCTATGCAAGTGTCACTGAAGCAAAATTAATAGATAAAATGAATCATCATGTGTCTCTTCAAAAATGTTTAATTCAAGCTTGTTACTAGGAATCGCAGGAAGGATGAGAAAACCTCGGTAAATTCCACAGGTCCTGAGAAAATGGAGCCTTCTGTGAATATACAATATAAAATTTCATGTGATGGCTTTTAATATTGACAATACAGTAAAAGGCTTAGGAAAACTATTTTTGCAGGTTGTAGACTCTTTTAGCATTAATTTAGAATGAATGATTTGTGTGCATTTAAGCCC…	0.311875693673696
148_NCASD	AAACAATGGTTTGTCTCTACTTGTT	57.595	ATCCAGAAACAGTTCAAAATCAACC	58.484	881	148	chr2:166326880+166327760	Noncoding Autism		2	2	165470370	165471250	881	99.4% (1 x 2)	AAACAATGGTTTGTCTCTACTTGTTAACTTACATGGAGCCATTTTTATTTTAAAGCACAGAAACCTAATTTTGAAAGATTAAACATTGCTGTAAAAAATAGCATCTTAACAGTCATGTTTCATGGGTAGTTTAATTTATCAGTCAAACACATCTAGATAAGAATTCCATCAGAGCATTTATATTGTTGATAATATCTCTAGGCAATTTTTTTTTAGCAACTTTACTAGGTGCTTGTATCTCCTAATATGGTCCTTTATATTGCCTTAGGGAAAAAAGGGACAAGTTCTAAGTATGTAGAATAAATAACACACTTGCAGTAAAAACATACAAAAAAACTGAACTCCCAGTCACTTAATTCTTTACTTTAATTCATAAATACAGGTCATTTAACGGTGGTA…	0.266742338251986
149_NCASD	TGGTTAAGTGTCATAATGAACCAAG	57.553	AAAGAGAAAAAGGAAAGAGTGTTGT	57.532	900	149	chr2:166327696+166328595	Noncoding Autism		2	2	165471186	165472085	900	98.9% (1 x 2)	TGGTTAAGTGTCATAATGAACCAAGTAAATATTCTGGTATGGTTGATTTTGAACTGTTTCTGGATTTCAAAAATTATTACATAATACTGAAATTTTGGCATGTTTCTAATTATTGATGGATCTTTCCGATTTTGTTTTTTTAAGCAAAACAATGGTTGAAATTAATCCACCCCTCACCCCAAGATTGAAATTCAAGGTGATATATAAGACCAGATATTCATCTCCTAAAATGTATTAGAGGAAATAAATCAATGCAGCTATATTTTTTAGAAATTATAAATTCTGAGTAAAGCTACCTCCAGGAATGAAGGGGAATTGATGAAAATTAGAGAGCAGAGTTCCACATGGTTTTAAATTATTCTGTTTCCTTGGAAACCAGCTGCTGCAGATGCATTTTGC…	0.343333333333333
150_NCASD	AGTGAGAAATGGGAAGGCATCA	59.69	TAACACGTAGTTTAAGCATGTGGT	58.701	890	150	chr2:166328460+166329349	Noncoding Autism		2	2	165471950	165472839	890	99.7% (1 x 2)	AGTGAGAAATGGGAAGGCATCACCATTTTTTTTTCCTTTGGTACAAACATTTTTAAGATTTAAATGTAGGTTTTTAATGGAGCTCACTATATACAGCTTTGTCCCCTTTTCACAACACTCTTTCCTTTTTCTCTTTATGTTTGCAGTGGTTTGCAATATAATGAATAATACAATAAATTAAGAAGTATTTTTTAATGTATCAATCACTTTAATCATAAAGAGAGAAGCTTGGTATATGTCCAGGCTATGGATAGTGAGGAGCATTCAATACACATTTTGACATTAGAATAAGAATTTTTTAAACTTAACGTCCAAACCATGTTTCATTAATGCAATTATTTCCTTACCTTTGTAATCTATTTAATATGTATAAAAAATTACACATTCCAACAACCTAAA…	0.270786516853933
151_NCASD	AAAATTACATGCTTCAAAGGCAGC	59.31	TAAATCTGACCCAAGCTTTCTTACT	58.22	890	151	chr2:166329070+166329959	Noncoding Autism	High mispriming possibility. Via online Primer3.	2	2	165472560	165473449	890	99.8% (1 x 2)	AAAATTACATGCTTCAAAGGCAGCACTGTCATCCCATACACCATTTTTTTCAAATCTCTCAGCTATTTGTTAAGAGGAAAAATCATCATAAAGCTGTTAACAGCTTTCCTATTATTTTTGTTATAATTCAGATGAGATTCCTAACTCTTATTTTCTCTTTACAACTCATTTAAATATTTGTGACATATCATACTTTATTTTCATAATATTAACCTTAGTCTATTAGATTCAATGTTAGCAATGTAGCAAATAAAGCACCACATGCTTAAACTACGTGTTAAAATATTTAATATGTAGCCAACATATTATTTAAAGTTAAATTAATTTGGCATGTCAGTACGTTATTTTCAAAAAAAGCTAAGATGGTGGGAAGTATTTTGTTTTTATCAATTAACACGA…	0.317977528089888
152_NCASD	GGGCTTATACAGATATTAAAAGGGG	57.06	CATGTTTCTAGGGCAATAAAAGACT	57.6	930	152	chr2:166330111+166331040	Noncoding Autism	Via online Primer3.	2	2	165473601	165474530	930	98.6% (1 x 2)	GGGCTTATACAGATATTAAAAGGGGGTTGGTTCAAAGCAGCATTATTGCTTTTTAATTATGATTTGGTATGAAGAAGCAAGGAATGGATTTATCAAGCTAATTGTCACATTTGGATATTTCACATATCTCAATGAATCAGTTGGGCAGATCATTTGATTTCTCTGTCAATTGCTTAGATTTCAGATATTATAATGGCCTAAATTGTTTGAGCTGAAAACTGTTGAATATGCATGCCCTGAGAAAACACTCAATATAACTTGTAAGGTATTTAATTCAAGATTATAACGATCTAGATAAATATCAGTGCTATTTCTATGAACTACGTATAGTAAGGAAATCACTTTGATACGAGATCAACTTCATGATCAACTTCATGATCTCATATCATGGCCTGAAAA…	0.325806451612903
153_NCASD	CTCAAACTCCTGGGCTCCAAT	59.995	TCATGAGCAACGAGAAGGGA	58.734	926	153	chr2:166330832+166331757	Noncoding Autism		2	2	165474322	165475247	926	99.8% (1 x 2)	CTCAAACTCCTGGGCTCCAATGATTATTCTGCTGCAGCCTCCCAAGTGGCTGGGGGATTGCAGGCTTATACCACTGTCCCTGGCAAAAGTAATTTTTATGCAAATGTTTATGTCTTTAAACAATATTTACTATAAATTCCTTGGCCTATACTCATTTAATTCATGTATTACCTTTTCATATTTTAGTCTTTTATTGCCCTAGAAACATGGGACTGCCGTGTAGAGAGAATTTCTTCCTGGATTCTTCATTTTACCTATGACAAAATTAAGGCGCAGAGAGGACAATGATCATATTTAGTGGGAAACTAAGTATTTGCTTATGCAAAATTACAAAGCAAGACACTATGTGTTTGTATTAAATATTAGATATAGTGCATTAAACACTGGATGAAAGAAAAG…	0.367170626349892
154_NCASD	TTCCCTTCTCGTTGCTCATGA	59.377	AGGAGAATGGGGATTCATTGACT	59.21	904	154	chr2:166331737+166332640	Noncoding Autism		2	2	165475227	165476130	904	99.7% (1 x 2)	TTCCCTTCTCGTTGCTCATGAAACTCATACTTAAAATTTTAAATGATTTGCCCCCTGTGCATCCAAATCAATAAGGGCCCCAAGGGGCTGCTCTCATGCTGCCCACTGAACTTACCTAGAGCTGAGTGTTAAATGGAAAACTGATCTTGGGGATGCCATTATAATCCATTTTCAGAGATCTTCCCACAACATACAGGCAGGGCCAAGGAGAGAAGCCGTGGGCCTGTCCTGTGCTCCCTGCCAGAGCTTCTTGGTGTGTGGTCATGACAGCCACTTTGTGATCTCTCAGTACCCTTTCGCTCACTATCTAAATTATAGCTCTTGATGACAAGGAGTTTCCTTCATCTCTGCATCAATGCCTAATACAATGCCTGATACACAGTATGTGCCCCCAGATTG…	0.396017699115044
155_NCASD	ACCAATCTGAGTGCTATCATACA	57.123	TTTTCACCCACTAGCAAGCA	57.643	915	155	chr2:166332586+166333500	Noncoding Autism		2	2	165476076	165476990	915	98.5% (1 x 2)	ACCAATCTGAGTGCTATCATACATCCACTCTTAGTCAATGAATCCCCATTCTCCTGAGTTAAATTTGTTCAACAACATTTGATTAAAGTTAAAATTGTTTGGCAATATTTTTGTGCTGCTCTGGGCTCACTTTCTGCCATTTGTGGTCTGTTCTGGTGAACAATTCTAAGCCGTAATGCCTGGTAAGTGACAATGCTGCATAAGCTACAAAGAAAACAAGTGTGCATGCTTGCTTGCTGTGTGTCACTGGGGTTTACTATGCCTCAGGGTAAAGGTAAGCAGATAATATGGGACTGGTAGAAGTCCTTTGATATAAATATCACCACAACTAGGTAAAAATAACCAAAAGAATAACGAATGAAATATCCTGATGAATTTAAACTGAAGGAAAAGGAGTGC…	0.379234972677596
156_NCASD	CCTTTACTCTCATGTCTTGTCTTC	57.04	GGGTTAGGTGATGAGGCCAA	59.38	900	156	chr2:166335050+166335949	Noncoding Autism	Via online Primer3.	2	2	165478540	165479439	900	99% (1 x 2)	CCTTTACTCTCATGTCTTGTCTTCTATTTACCTTACTTTTCTTCTTCAAAAGTACCTGGTTATTTATTGAACATTTCTTGAATCTTTAAATAAGATCCCATTCTTCAGTTGCTCACAGTCTATTAAGAAATTGAGTAGGAAACCTATGCCAAGTTTTATATAGAAGGGGTGTAGCATGACCTTAAAGAGCACAGTCTACGGAGTCAGGCAAGGTGAGTTTTAATTCCAGCTCAGTTACTTAATTGCCTTTGTCAGTGTATGTAGGTTACTTCCATCCTAAGCTTCATGTTGCTCCATGATAAAAAGGGAAGCATAATGCTTAATTCAGAATCACTGTAAGGGCAAACAAGATAACATGTTCACAGAATTTAGTTTCTAACACCAAGTAAAAACTCAAGA…	0.33
157_NCASD	TGAGCACCTGAACAGTTTCCT	59.51	AGGCAATAAGAAATGAGAAGCCAG	59.356	915	157	chr2:166353567+166354481	Noncoding Autism		2	2	165497057	165497971	915	99.6% (1 x 2)	TGAGCACCTGAACAGTTTCCTGGAAGGTTAACAGTATAGTGGAGAGTGGTTTTATTTTTTAATAACTATTTTGACGTGTGGTTTTAACTGCTCCACTCCACCACCATTACTCTAGTCTGGAAAGGAGAAAACACATACATATCCACTGTGGTCAGAGGAGAATACTTAAGCTATTGAAGAAGGCAGCTGCAAAGTTGATGAGTTTTTTTCCCCCCTGTAGTGCTGTTGATGTACTTTTCTTTGTGAATTTTCAAGAGTTTTGAAGGAAACATTTGTTGATACTCCTCTGGAAGGGAATGGTGATAGGCATCATTGAACAACTTGTAATTGAGTGTGTAATCAGAACCATGACTTGAGATAAACAGTGGGGAGGAAGGATAAAGAATAAATGGCAATATG…	0.380327868852459
158_NCASD	ACAAGAATCAAAATGTGAGCTGGT	59.414	TTGAAGTTTGGTCCAATTGTGCT	59.55	901	158	chr2:166354251+166355151	Noncoding Autism		2	2	165497741	165498641	901	99.7% (1 x 2)	ACAAGAATCAAAATGTGAGCTGGTGGCAGAGGACTTTAATGTAGATCCCTAGAGTCTACCTCTCTACCAGACCACACAGCTCTCTGATGGTTCAGTTACAAGCCTGGCTACTAAGTAGAGGGACACAAATCAAGTCAAAGATATGGCTGTAGCTTATATGCCAGCATCTCTTATAAATAGAATGAATCTATCTTTTGGTAAATGTAACTGGCTTCTCATTTCTTATTGCCTTTTTGTGGCTTTAGGGCAGTGCTAGTGATGAGTTTATGAACAAATTCAATGAGCTAAATGAAATAGTGGGCCGAGAATTCAATTTGAGTGTGAAAGAACATTTTACTTCCCCTTTCTGTAAGTAAGTGACAGGGCAGATTGTTGAGACTTTCCTTGTATGTCACTGAC…	0.365149833518313
159_NCASD	GAAAACCTCCAAATTTCCCACA	57.32	ATTCTGATTGCTCTTTCTTCCTTAC	57.38	900	159	chr2:166355333+166356232	Noncoding Autism	High mispriming possibility. Via online Primer3.	2	2	165498823	165499722	900	98.5% (1 x 2)	GAAAACCTCCAAATTTCCCACATCTATTATTTACTCAGGATGTTCATAGGTGGAATTGATACTGTAGCTACATTTCATAAAGAGCACAAGAATTAAAGTTGCTATTAAATATTAAAGATACCATCTTCACATTAGTGATCAAAACATTTTCATCTGACAGTGTAATTTATTTACAAATAAATCTTAGAGTGTTCGTATTTTATAAACCTCTTGTTAGAGAATCACATCCTTACTTTGGGTCCATCTAGCAGTGGTCACAGGCAATACATAAATGATTGCCCAACTGTAAAATATCATGGCTTGAAAAATGCATCCAAACAAATTTAGGTAATTAAAATTCTACTAACCATCTTCAAAGTACCATCATCTTCTAGCTTTGGTTTGAATACCAGAGATTGA…	0.338888888888889
160_NCASD	TGCAGTGAGTTAAAATTACAATGGA	57.482	GGCCTAGGTGGGAGGATTAC	58.943	882	160	chr2:166356342+166357223	Noncoding Autism		2	2	165499832	165500713	882	99.3% (1 x 2)	TGCAGTGAGTTAAAATTACAATGGACTCTCGGTTTGTTGCATTTGCCTTCATCTCACAAATATTATAATAAGGGAGTAGTAGTAAAGACTGAGTTATATAATTTACAGTTCTAGACATTTGAATAAAATTTTATGAAACTTGATTTATATAGTGAACTCTTAAGTCTCTTTACAATCCTTAATGTACAACTGCAACAGACTTAGCATCACCAAAAAAAAAAAAAACAGGAAAGAAAACACCAAAAACTCAAACTCAATTGAAACAATTTTCAAAAGCAACATGCAAGCTGGTAAAGATTGCTAGATAGAGTGCTAAAAGCACTAGATGTTTCCATGGTGAGACCCAGTCTGTGGTGGGTCCCATTAATTGTGTCATGTAGATATGCAAAATACGTAAAC…	0.357142857142857
161_NCASD	agtgcgaggattacaggcg	59.86	cacaatgcctgccaaatcat	57.32	882	161	chr2:166357230+166358111	Noncoding Autism	High mispriming possibility. Via online Primer3.	2	2	165500720	165501601	882	99.1% (1 x 2)	AGTGCGAGGATTACAGGCGTGAACCACCGTGCCTGGCCATTATTTATATTTGATCTTGAAATTTGTTCTAATGCCTACAACTCCCACATTTTTGAAAATGTATATACTTTAAATTTATCAGAGGCTAGGGTATTTAATTCCATCTTTGAGAACCTTGGTTTGGAATAAATCATGGAAAGTAATATTATATATAATTTTTCCAACATAGCCTGTCCTATTTTATGATTTCCTCCAAAGATGCTGTCCATTATCTTCTTGCTCTGTCAGATCCAACTTTCTGCTGTTTGCTGTTTCTATGACAACCATCATTTTGGCTTGGAGAGATTAGTACATATTCTGGATATATATACATTTATAGATATATATTTCAAGAACTCTTTACTTGCCAAAAGAATTGAT…	0.335600907029478
162_NCASD	CGTACTCCATGTTGTTACAAACAGA	59.536	ATAAGAGTTACTCGCAGGGGC	59.587	916	162	chr2:166364150+166365065	Noncoding Autism		2	2	165507640	165508555	916	99.8% (1 x 2)	CGTACTCCATGTTGTTACAAACAGACCAATTTGGGGTCAGACTAATTACATGATTATATACCCTTCTGTCTGCCACAACATGCAATGCTTCTGGGGCGTAATGAAAGTACTTAAACATGTATAAATACTTATTAGGTGCTCAGCACTTTCTACAGGGGACTGTTTGGGATACTCCTAACATCTTATTGTGGCAGAAAAGATACGGACATATTATTGTTAGAAAGCCTGTGGTTTGTTCCACATTTTTTAAGAGAATAAAACTTGTCAGGGCAGCCCTAGCAACCATTCAAGAGCTTATTTGGGCATTCTTGTTCTCCAGGACAAAAATCGCATGGTTTCCATGCAGGAACATATCCATGATAACACTTAAGGTAGGTGCCATCGACTGCTTGATTAACT…	0.366812227074236
163_NCASD	GCTAGATTTCTTTGCCCCAGG	58.97	GAAGCCCAGGGTCAGATGTC	60.11	917	163	chr2:166369665+166370581	Noncoding Autism	Via online Primer3.	2	2	165513155	165514071	917	99.7% (1 x 2)	GCTAGATTTCTTTGCCCCAGGCCCTTTGCTCTGTCAGGAAACTGTCCTTCAGAGTAAATGATGCTTGTGCTGGTTGCAGGCATATTAATTATGCAATGCTGTATTTTGAGATGCAATTGCAGATGCAATTGAACTATTTCACTGAATTTACAAGTTTTATTATCACTTGAGAACACCAGACAATTACTCCACTTGTGTTCATAGACCATCATTCCCTTTTGACGTATTTGGGTTGTGATGTGTGCCAGGCTTCCAGACAAGCAGAAGTCGTCAACTTAGAGGTCTCAAATTCTGTGATTCCGACAGGAACAGATTTATTCTCAAAACCCCAGCATTGGCAAAAGAGATTTTTTTAAAGGCAGGAACAAGATGACAGCCTTTCAAACAAGTTCTATTTCT…	0.391494002181025
164_NCASD	ACCTTTCATTCTCTAGGTCTGATT	57.117	TTGGGATGGTGGTGAAATGA	57.011	872	164	chr5:14016439+14017310	Noncoding Autism		5	5	14016330	14017201	872	98.8% (1 x 2)	ACCTTTCATTCTCTAGGTCTGATTTTCAGGATTACAGAGCTTTACAGTGCTCTCTCAGCTCACTAGCGCTCCATGCAAGTCATCATTTTTGCCCATTATTACAGTCATATAATAGTAACCTCTTTCTATTTTGCAGAAGAGAGACAGAGTTTACTAAATAAAATTTTATTGACAGCTTTACTTTCATAATTTTGGGGGAAAACTTTTGTTGCCTGTCATAAACTGTGGGCTAGCAAGTGTCAACATACAATGAAGGAATTAATCAGTTCAAAAATCAATATTAATTCACGTGATAAACTTGGCAGTGGCAGAAGTCACTGTTTGTTGGCTCATCCATCCCTGTTTCAATGTCTTTGCCTGCCTCTAGCAGAGCAACAGGAAACTGTCAATATTTCCCGG…	0.401376146788991
165_NCASD	CGCCTGGGAATCCTTTTGCT	60.967	CAGACTGAGCCGCCAAGT	59.655	919	165	chr5:14016901+14017819	Noncoding Autism		5	5	14016792	14017710	919	99.8% (1 x 2)	CGCCTGGGAATCCTTTTGCTTTCCTGATGAAAGAGGCAGACCCAGCTGTCTCTTTCACACCTTCTTCCAGCTGGAACTTGGCCCTGATGCCTGGAACTGTTGCAGTCAGCCGTATTATAACCATGAGGGCATAACCATTCAAATTACAGAAATGATAGCCTTGACATCTCTGAATCTCTGAACCAACAATAACAGGTGCCTCTCCCAAACCCACTTGTTACATGGGGAAACTGAACCCCTGTCTATTTAAAGCATTGTCAATTGTGTTTTCTCTTGCCCAAAACTAAAAGCATTCCTAATCAATACAGCAACTATCAACTATTCTCAGATATTTTTGTGGGTCGATTTTATTTTACAAATCTAAGACTTTTAAGTTGTATAAGCAGAGGTTCATTTCAC…	0.482045701849837
166_NCASD	ACACCCACACATTTGATACTACAA	58.374	GGTCCAGACACTATTTTTGTTGGT	59.417	919	166	chr5:14019734+14020652	Noncoding Autism		5	5	14019625	14020543	919	99.5% (1 x 2)	ACACCCACACATTTGATACTACAAGACTGTTTGGCAGTATTTGTGTAATGTACTTTATAAAAGTTTGGGAATGCTAATTAACAAAATGAATTATGAAAATAGAGAAGGAGAGATGTAAGGTAGCATAGTATACATAACCTTCTCACAACTGGGGAGCAAATTTTAAAAGTTAAGCTCTTCAAAGGGAGTCTCTTTGTAGGAAGGAGGAAGGTGGTTTCCTAGTTCCTAGCCTTGTTTACCAGTCACAAAGGTGTATTATTATTTAGGGTTCGGCCAGAGAAACAGATTCAGTAAGATGTATATGTATGCATACATGTATGTGGGCATGCACACACACACACACACACACACATACACACACACACACACACACACACCCATATATGCAAACTGTATATA…	0.357997823721436
167_NCASD	TCTCAAAAGGCAGATGGTCAGT	59.627	AGCACCTTATTCCATGCCCTT	59.711	915	167	chr5:14022970+14023884	Noncoding Autism		5	5	14022861	14023775	915	99.8% (1 x 2)	TCTCAAAAGGCAGATGGTCAGTTGGGTGGGTAGGTAGATAACTTTCCAAATGGATTATTTAACCTTCTTCAAGTGTGTCAGACTACTGCTCAGAAACGCTAATTTCTTCCCAAAAGGAGTTATAAATTGTGGCAAAAAATTTCTATAGCAGACCTTGTTTGGGACAGTTTTCTTTCTCAGTTGCCATTTTGAATTTGGAAAACATTATATATACGATCTACCACCAATTGACAAAAATAACCATAGAATTACACTCTATCACAGGATTACACTGGGGGAGGAATATCAGAAAGAAAATATGCCAGAGAATTCCTAAAATTGGGCACTTGAAAAATGTTTCCTGCCAATGAAGAGGAGGCCTTGTCACATGCCTCTACATGCTTCCTAATCTATAGTCTC…	0.436065573770492
168_NCASD	TGAATCTCAACTTATATCACTTGCC	57.208	GGGGTGGAGTTGAATGTGTT	58.005	917	168	chr5:14025423+14026339	Noncoding Autism		5	5	14025314	14026230	917	99% (1 x 2)	TGAATCTCAACTTATATCACTTGCCATTACTATTAGTGCGATAATCATTGTTCATTCTCTCAGGTTTTTCTCACCAGGGCAAAAATGGTGTAACAAGATCTTTGGGAAACCGTTTCCTGCTGGGGTGACCCTACAAATCCCCTGTTTTTAGGTAAACTTGTGAATAGACTACCTTAAGATTCTAGATGCACAAAGTCTCATAATTTAGACTCCTCAAAACTGGATGTTTTTGATAACAAAAATAAGAATTGGTCTCCAATGTGTCTTTTTGCTATGTGTAAAGAAGGAGTTTGCTAAGTAAATGGATCGTGTATTCAAAATTTGTTTGAAGGAAAAAAATTTAGCCTGTTGAATCTTCCTATAAGTAATTACATTTTTTAAATATTTGTAGGCACTCCA…	0.387131952017448
169_NCASD	GCAACCTCTGCCTCTCAGT	59.324	CACAGGCAGGGGGTGTAG	59.329	915	169	chr5:14026890+14027804	Noncoding Autism		5	5	14026781	14027695	915	99.3% (1 x 2)	GCAACCTCTGCCTCTCAGTTTCAAGCAATTCTCCTGCCTCAGCCTCCTGAGTAGCTGGGATTACAGGCACCGGCCACCACGCCCCACTAATTTTTGTATTTTTAGTAGAGATGGGGTTTCACTACATTGGCCAGGCTGGTCTCAAACTCCTGACCTCAAGTTATCTGCCCACCTTGGCCTCCCAAAGTGCTGGGATTACAGGCATGAGCCATCATGCCTAGCCACCAATAACAATTTTATTAATATCTTTGTTAATGTCAAATGACACGTGTCCCTTAATACGTGGCAATATCTGTTTTCCAGACTCCACGGGCAGAAGGTACTAGGATGTACGAGAAGGTACTGTGTTCTCAGTGTAATGTAGCATTATTTCAGTTTGCTTAGAGCTGTACCACAATA…	0.440437158469945
170_NCASD	GCTTGACCCTGAATGGTGATT	58.55	GACTCCCATTTTATCGATGGTGA	58.296	894	170	chr5:14030020+14030913	Noncoding Autism		5	5	14029911	14030804	894	99.6% (1 x 2)	GCTTGACCCTGAATGGTGATTGTATGGCGTGCCCTCTGGTACCTGGCATAGAGAGGACAATTAGGGTGCTGTGTGGGGCTCTTTGTTCTCCTCTGCCCCATCCTCTTTTTCTCCCTGATGGCACTTTGGACCCCTGGTTCTTCAGAATCACCAGGTTTGACCTGGACTCTGCAGATGAGGTCCTAAGTAGGAAATTCACATCGTGACAGCTCAGATTTCTCTTTTGTCTCAAGTCTTTGGGATGGGAGCAGAGAGCTGAACACAGTCTTATTAGTCAGAAGGAAGGGGAAGGAGTCTAGTGGGCCCAAAGAACTAACGGGGCAATCATACCTATCACCCCCAAAGCATAGATAGAGCAAAAAGTTGGGGTCAAGACAACATATTCTGCTTCGTAACTGC…	0.487695749440716
171_NCASD	TCTCTGTTCCTCATTCCATAGCA	58.97	GGTTCTTGAGCCAAAGGACC	58.75	890	171	chr5:14034031+14034920	Noncoding Autism	Via online Primer3.	5	5	14033922	14034811	890	99.5% (1 x 2)	TCTCTGTTCCTCATTCCATAGCATCTCCAACATTGAGAGCATTGTGAAAATAAGCAACAGGCAGAGAAATGGATGATCACTTCTGACCGTGTAGAATACAAAGCAATTATGAGCCGATTGTAATTCTGATGCTGTTGATTTGTTATTCATCATTATAATGCACCTGACAGCAACATAGGCTTTCACAGGCGCCATTTTATTTAGTCATCTCTTCAGCTCTGAAAGTAATTATGGTTCTCAGAGAGAGTTTTAGCGATTTGTTCTAGATTTGTTCTAATAAATGGCAATGGCAGGTAAAGAGCCCATATTAAGACAGGTTGGGCAGAAACAGTACATGAAGTCAATTATATTTGAAATTACACTTACTAATGCCTGTAAAATGTGTTTGTCATACATATC…	0.414606741573034
172_NCASD	ACACAGCCAGACCATATCAGC	60.134	AACCTGCAAAGGAAAAATGGTTT	58.146	900	172	chr5:14034809+14035708	Noncoding Autism		5	5	14034700	14035599	900	98.8% (1 x 2)	ACACAGCCAGACCATATCAGCAACTAAGGCTTAGAGCGGTTGGGTAATTTGCTCAAGGTCTCAAGGACGATAAATGATGACTTTTGAACATGGGTCCTTTGGCTCAAGAACCCATGTGGTTTTTGTTTTCTTCTATTTCACTTGGTTTATGCCTAATGGCCCATGTTTTATCAGGAAGGTGTGAATAAAGACATGTCCTAGCCAGGAGGTGCTAGGGCTGAAGGTTTGAGGGAAAGTAGTAGAAAAGGTTTCAAACAGCTGCTTTGAGTGCCTGCTAATGGCAGATTATGGAAGCCCAATGTTGAGGGTCTAGTAAGGGTAGGTTATGGAAGCCTGACACGGGTGTCTTGGAGCTCTCTCCCTGGGACTCCTGTGCTTGTGGTGCTGTAGAACCAAGTG…	0.465555555555556
173_NCASD	GGAAACATGTCCTCTCCGTG	58.273	TTTTGCAGTGCCTTTGCTG	57.634	915	173	chr5:14035726+14036640	Noncoding Autism		5	5	14035617	14036531	915	98.3% (1 x 2)	GGAAACATGTCCTCTCCGTGCAGACTGAGCCGACAGGACGGACATTCTTTTGATCATTTTACCATTTTCATGTTTGACACACAACAGCTTTTTCACTGTTCAACCCAAATTTGAAGAGGAAACAAGATAACATCTGTTTCCTTCACCATCCTTCCATGCATTTCATAGCACCCAGATATATAGGTGCTTTGCTCACAGGGATCACGCTATTCAAGTTCACCTTCTGATGATTCTGAGATGAAAATGGCATTTGCTATAGATCCCTCTCACAGGGTAGGCCGGGAATGCAGACTAGCTAAGTAGGGAGTGGGAGGCAATTACTCTAACCTCAGTGGACAAAACAGTTCCCCAAACTGCAGAATTAGCAGAGCACAAACGCTGCAGCTGTTTGCAAAGGCA…	0.427322404371585
174_NCASD	TGCAAAGCCTTGAGCCTAGC	60.962	GGTGGCTGTGCTGTGAATCT	60.607	901	174	chr5:14036676+14037576	Noncoding Autism		5	5	14036567	14037467	901	99.8% (1 x 2)	TGCAAAGCCTTGAGCCTAGCTCACACCGCTTCTGTGCAAATTAGAAAAAGGTGGCCCCCCAGGTTGAAGGAATTAGGAAAAAGCACCCACTTGGGGCAGCAGCTGCTGACAGCCATGTTTGGGGGCCTGGTGAGTAAGCAAATGGGCTGGATCTCCACTCACCCCCCTGCCCTGCCCTCCAGCCCTTCCCCTAACCACCTCCACCCCTGCTTTTGTGCAGAGAACAAATTCCAGGACCTTGTGCAGTGGCGTGAGAAGAAGGACATGGAACTTTTTATGACTCCCCCTCCCCATTTTCCTGGTAAAATCTTTTTTTCCCTACTTTTGACCCTGTTGTTCCTTATTGCTAACACTTGGAAACACTGATTTTTTTTTTAATTTGTCACGCTGTACTAACAG…	0.508324084350721
175_NCASD	ATCAGGCTCTGCTTTTAGGGG	59.786	TTTTGCCTAACTGTGGTAAATCAAA	57.886	915	175	chr5:14041436+14042350	Noncoding Autism		5	5	14041327	14042241	915	99.3% (1 x 2)	ATCAGGCTCTGCTTTTAGGGGAACCCAAAATAAGACACTCTTCCTGTATTTGGGCACAATTTTATGAGAAAACGACGTCTTGTGGATTTGAGAGGCTGAAGCTGAGGATGAAAGTCAATGTGCTGGGGATGGTGGAATGGAAGCATGGGAAGAGCTAGGAGGCCTTGGTGACATCCCTAAGAGGCTGGATTCCCCTCACCTGCTGGTTCCTTCCTCTGTGCTTGTTGGGACAGCAGGGAGAGAGATGACAGACCCCATGCCATCATCTAGGGCACCTTCCCTGGAGCACCCTAAGTGATCACAGTGGTGTTTGTTCCACAGCCTCCATGCCAGTAGGAGGCAAAAGAAACGTTTTCATGTTAGGCCAGTGAGCAATGCCAGGAGTCTCAGCTGGATGTG…	0.47431693989071
176_NCASD	TAGAGTCTCAGATTGATAAACTGGC	58.189	GGGAGCCTGTAGTCCAGC	59.096	900	176	chr5:14046393+14047292	Noncoding Autism		5	5	14046284	14047183	900	99.5% (1 x 2)	TAGAGTCTCAGATTGATAAACTGGCAACAAACCCATTTCTAGCAAGGCACTAAAGCACACCCAGGTGTCCTATCCCTGCAGGCGTCCCAAACCCAGGGCCACCTGCACCACAGGCTGGTCTCCAGCTTCCAGTCACCTCCCTTACACCAGTGGGAGGTGTTAACATGAAGGAACAAGGAGCTAGATCCTCATCTAGTTGATCTGCGTCCCCTGTGCATTAGCTTCTTATGGCTGCTGTATCCAGTTACCACAGATTTCATGGCTTAGCACAACATAAATATATTCTCCTACAGTCCAAAATCAATTTCACTGGAGTAAAATTAAGGTGTTGGCAGTTCTGTGTTCTTTCTGGAGGCTCTAGACAAGAATCTCTTTCCTTTTCCTTCTGGCTCCTATAGG…	0.482222222222222
177_NCASD	TGCAAAATTCTCTGTTCTCCTCA	58.282	TCCACAAGTACCATTAAGTGCC	58.318	922	177	chr16:6909350+6910271	Noncoding Autism		16	16	6859349	6860270	922	99.4% (1 x 2)	TGCAAAATTCTCTGTTCTCCTCAAACAGATGACGCTTTTGCCCATACTTGGCTCTAATATCATAATTGATTTTACTTGTCAGCTCTCTGTTCATCAGAGAACTTGATAAGCAGAAGAACAGTTGCTCACTCTTGTTCAAGTCTACTGCCCTAATGCCCATGGACCTGCAAATTTCCCAAATGTGAGTGGTTTTTATGCTGCCTGTGGAAATCTGAATTTAGATGAGCCACACTTTGTAGAAAATGCTTCAGAGATCTTCCTGCCGCCTCTCTGTGTCGATAACCTCCATGGAACTGTGTTTGTGAGATACTCAATAATGGAACCATTTAATTCAAATTTTTTAATCGACTACGGTATCAGCAAAATGAGAAATGTCTTTCACCCTTGATCTTTGACAAT…	0.382863340563991
178_NCASD	ATCACACTTTTGAGTATTCAGAGCT	58.529	ACATGACACACCAGACATGACT	59.63	870	178	chr16:6909838+6910707	Noncoding Autism		16	16	6859837	6860706	870	99.5% (1 x 2)	ATCACACTTTTGAGTATTCAGAGCTTGCTTTTCCTTTGAGTTAGAGGAATGCATTGGAGAGAAGTGTTATTGATGAGGGCTGATTAAGCAAATTAATGAATTGAGACAGCTGAATAGTAAGTGAGAAGAATTTGAGGAGTGGAATTGGTTTTTGCTCATTGACTGTAAAGTGTAGGAGTTAACACCACAAGGGTACCTGATGGAACGAGCTATAATACCGAGGTAAGTGAAGAGAGAGCATTTGGAATTGTGTACTATTTTTCCTCTTCCAATGAATAGCTGTGCGCTAGCTGTTCACTGCTTTCCTGGCATATGTTTTTCTTGCTTCATTTTCTGAGTCATCTGCAATAGCGGAAATGAATTCATTCAACAATATATATTGAATGCCCGTTATGTTCC…	0.394252873563218
179_NCASD	GCCCACCACTGTTAGGGAG	59.7	CCTGCCAGTGCCAGAGAG	59.732	915	179	chr16:6911016+6911930	Noncoding Autism		16	16	6861015	6861929	915	99.4% (1 x 2)	GCCCACCACTGTTAGGGAGTAGGGGAGCGGTTGTAATCTGCGAGAGTGACTGACAAGGATTCCATTATATTTGTTATATTTTATGTTGCAAGCTGCGGGGTGGACATACGGCATTTGCTCCAGCATCTTCCGTATTTTTTATATGTCTCATGTATTGCATAAGAAAAAAGAGTGCATCTGAACAGCTACAGTTACCGCTGTGTCTGTGTGTATTTGCATGCTGAGTTTTTTGAGCACCACACTCTAACCATAGTCTTTGCAAAAGGGTTTTATACAAAAACAAGGTCCCTTTCGAGTGCATTGTCTTGGTAAGATTGTTAAGGGCAGATGAGTAAAGAGATGCAGTACCCTCAATCTACAAGACAAAAGATGGACCAGTCAAGCAGTTCCCTAATGTCT…	0.415300546448087
180_NCASD	AATGAGGTCAAATTCGTTTTGGA	57.217	GCCTGTAACATGAACTCTCTTTT	57.051	915	180	chr16:6911686+6912600	Noncoding Autism		16	16	6861685	6862599	915	99.1% (1 x 2)	AATGAGGTCAAATTCGTTTTGGAAGGCCCGGAAGTCTTCAGGATTTACAGCTATTTGAAAACCCTATTGATAATAAGTATTTGGCCAAAGTGTTTCCACGTTCATACACTCCCCCTCTTTCCTAGCCAGCGTCCCTTGGTTTTTTTTTTTTTTTTTTTTTGGTTTTTTTTTTGGTCTAGCTTGCACTTTCTCCCTGCCCAGAAATGTCGTTAACATTAACAAGAGCTCTCTCTGGCACTGGCAGGGGGTCTGCAAACAGAACTGGTTTGGAATATGCAATGGGAGGCTTGAATCAAAGAAAAGCTGTGATACAGACTGTGGAGTGTGTAAGACAAACTCGATAAGCTCCAGTCAATACTGTCAGGAAAAATCACAGCAAAACTGATTTCGATGAGAAGA…	0.427322404371585
181_NCASD	GTGGCCGGCACCTGTAAT	60.045	CTGTAAGGTTGTATTTGGTTTTGGT	58.188	929	181	chr16:6912850+6913778	Noncoding Autism		16	16	6862849	6863777	929	99.5% (1 x 2)	GTGGCCGGCACCTGTAATCCCAGCTACTCAGGAGGTTGAGGCAGGAGAATCACTTGAACCCAGGAGGCAGAGGTTGCAGTGAGCTGAGATCACGGCACTGCACTCCAGCCTGGGCGACAGAGGGAGACTCTGTCTAAAAAAAAAAAAAGGAAGACAGGCCGCAGCTGATTTTTGAAGGAATTTGCAGAGTCCTTCTAAGGTGTTTGGTACATTATTCTATGATGTATGGTGGAGAACAGTGGAAGGATTTTTACAGATTATTGGTGGGAGAGTGGATGAAGAGAAATTAATAAGCAGGGGATCAAAAGTCTAGGTGAAAAAACAGGAGGGCTTGCCTGAATTACTTTTTGGAATAGAGAAGGACATGGCACAAAACATTCCAACCTAAAGGCAAGACCC…	0.399354144241119
182_NCASD	TTTCTGTGCAGAGTAGGATGAAA	57.772	TCCTTGTTGTGAAGCTAGCCA	59.58	918	182	chr16:6919567+6920484	Noncoding Autism		16	16	6869566	6870483	918	99.3% (1 x 2)	TTTCTGTGCAGAGTAGGATGAAATAGAGAAAGAAAGAACAGGAAAAATATAATTGGAATCTGTTTTCAACTCTGACGTGTTAGAACTAGGATTTTTACCCTTCTCAAAACAAATTCTAGGACACACATTCATGCAGTTGGCAAAGCCATGTGACTCTAGAGAACCGTGTTGACTGATTGGAAATGGGTAAAATTCTAAACAGCATCAGCTTGATGTGGAATTTCCAATTACTTAATTCTGGTTGGTTTTGAAGACACATGAGCTGACTGCTTCACGGGAATCAGGAATGAAGGGGAATCTGTTCAGAACGTATATGTCTCCCCGCAGTAAAAGCAATTCAAAGCCATAAATTACTTATATCATCTCAGCGTCTTGGGGACTGCTTACTAATCTTAGGAC…	0.389978213507625
183_NCASD	TGCCTACTTACTGTGGCCG	59.405	TCATCTGAAATATTTCTAGCCACCA	58.101	918	183	chr16:6927488+6928405	Noncoding Autism		16	16	6877487	6878404	918	99.4% (1 x 2)	TGCCTACTTACTGTGGCCGAAAGGAAAAAGAGCATCGACTCTCAGTGCTTGGAATTCGGAACAACTTCTGAATTCACAGCCCCAGAGTCTTGTGTGTGTGCAACAATAACCGTGTCTTTGCATTTGCATATTGCTTTAGAGTTCACAAAGCATTTTTACGGACAAGCCCATACTGAGAATCAGAGCAAGGATTGCTATTCTCTGTGTATAGTGAGAAAATAGAGGCTCAAAGAAGTTTCCAATATAGTAAGAATTATTTCTGTAGGACTTTTAAATTGTATAAATTGCTTTAACGCATGCAGTTACATTTTGCTTGTGTAACTAGGAGAATAAGTCATCTAACAGTCTTCTTCCTATCCCCAAAATACCCATTCAAAGAGAATAGGGAAAGGATTGCTT…	0.398692810457516
184_NCASD	ATCAAGCAGATCATTAAGGCAGA	57.955	AACACCCCCTCCTTGTGTG	59.463	901	184	chr16:6933120+6934020	Noncoding Autism		16	16	6883119	6884019	901	99.5% (1 x 2)	ATCAAGCAGATCATTAAGGCAGAGGTGGGGAGGTAGCCATTTATATTAAAGATACGTTTAATGTTCTGAACCTAAGCAATAGAAAGAAAGTACTTAGCTTAGAAATCTCGCTTTGCTACACTATGGGTTTTCTTTTTTAAAGTTGTCCTAGACCTTCTTTTTGCTTGCTTAATGCTACTTTTTGTTGGAGCCCCTGGGAATTTGAATGAGTTAATAAGGCAGATCTGTTTGTAAAAGAGTATAATCAAGTAAATCACAGCCTTTAAAATCACAGATTTCAAAATCCAATCAACTTAATTAATGTGTTGGTTCATAGACATTGTACAAGATTTTATTTGATTGCACTAGCCGCTTTCTCTTAGACACCCATCTGCAAGAATATTTACTTATAACTTGTTG…	0.362930077691454
185_NCASD	TTGTAGTAAGTATTGAAACCTTGCC	57.557	TGTCATCAACACAGTTCCTTGC	59.382	870	185	chr16:6933652+6934521	Noncoding Autism		16	16	6883651	6884520	870	99.1% (1 x 2)	TTGTAGTAAGTATTGAAACCTTGCCTCCCACATCCAGGCTGTTCAAATATGAGATAAAATAGTTTCTAAGAATGATAGAGTCCAAAAGTTTTCTACAGTTCTTATAGATGTTGTGAGCTGAAAATACATGGGTTAGTGAAGAGGTTTTTTTTTTTCTTTTCTCTATTATTATCTCTTTTTTCCCCCTAGGAATTAATGTCCTTTGTAGTAGCCAAAATGTTAAATGTTTTTAATAAAAGCTGAGACTTAAGTTAGAGGGGAACATCTTTACCCCAGGTACAAATGACGTTGCTACTTGCCACGGTCCAAAGCGCAGAGGAGATGGGGAGATTGTGAAAACTGGGGAGTCACACACAAGGAGGGGGTGTTTTTTGTTCTTCTGACAAACTGATCCTGTTA…	0.454022988505747
186_NCASD	AGGATTTAAGAACAGTAGGCAGT	57.236	AACACATGCAATTCCCTGAAG	57.052	900	186	chr16:6938141+6939040	Noncoding Autism		16	16	6888140	6889039	900	98.7% (1 x 2)	AGGATTTAAGAACAGTAGGCAGTAGTTGTGACATTTTGAACATTTTATTTCTTTACCCAAAAAATAACTAACTTTTGTAAAACCAATGAAAAGAAATGAAAAGAAAATGAAGGACCACAATGCTTTATGGGTTTGTGTTTCTGACAGCTTAAGTCCTGCTCTTGAAAGTAGTTACACAGTTGGCAATATACAATGAATCACTGAAGCTGTTTGAAAACTTTTTCGTTTTTTTGTGAAAATCCAAACTTGGAGGAGAAAGAGCTTACTGATGTCAACACTTAGAAAGCAGTGTTCTCTTTATATAGTCACTTACTGTCTTGGGTTTCATTTTCGGTTCAGGGGGAAATTAAATTCCCTTGCAATTGCACTCTCTGTCTACCGAGAAATTTTATCTCCACA…	0.364444444444444
187_NCASD	GTAGTTAATCTACTTGCCCATCGA	58.16	AGGAGCTCTGGGGAAGTTCT	59.882	900	187	chr16:6941331+6942230	Noncoding Autism		16	16	6891330	6892229	900	99.6% (1 x 2)	GTAGTTAATCTACTTGCCCATCGATATAAGATACAGACACTAAATTTGGGTCTACCCAGTTCTGAAAACCCAGAAACCCGTTTGCCTTTTCTACCTAATAGTACCTTGTTGATGAAGACACATACACACACACACTAGAGAGAGAGAGAGAGAGAGGAGAGGAGAGGGGAAGATATATCAGCTACATAAACTTCCCAGTCCTGCCTTATTTATTAGTCTGTGATGGTTAGTTTTTTCCAGTGCTCCAGGCATAGCATTCCTCAGCACCATTGTTCCAAATCACTGAAGCTGGCAGCATTCCTTTCCTTGCTTAATCTCTGCAAGTTTCAACAAATTGTTAATGTAATGTTTTCCTTGAACATACTTAACATTTACTTTTATTCATCTGAACGTGGAACG…	0.426666666666667
188_NCASD	GCTTCAGGGTGTTCTGTGC	59.048	GTTTTGGTCTTCATGATAAATGCAA	57.112	927	188	chr16:6942834+6943760	Noncoding Autism		16	16	6892833	6893759	927	98.6% (1 x 2)	GCTTCAGGGTGTTCTGTGCCCCCCTCCCCTGTCTGATTTCTGTCTCTGCTCATTTCTCACCACTCACTCTCAGTCTTTGCTCCTCAGCTATTCTTGCGTGTGTGGCGCTGGCTCCTGCTCTGCTTTTGCCTTGATCTAGTTTTACTTTTAATTGCAAAAACTACAATTACTTTTCATTGCAAACACTGCAGTTACCTTTGCACCAACCGAATACATGATCTTTCTCTTCAGAACTTGTAAAAGACTGCCCACCTCACCTGACCCTCCTAGATTCCATTCACAGGAGCTCACTGTCTGCAGAATGAATTGCCATTGAAACAGCTCTTTCACCTCATTTTGCAGGCAGTGGAGTGAGTTTACAGGAAATGGACAAGCTCACAGGGAAGCAGAGACTGTGGA…	0.427184466019417
189_NCASD	TCTCTAATTCTGTGAGAATGCCT	57.053	TTTTAGAGCTATCCAGGGGATTCT	58.772	880	189	chr16:6944420+6945299	Noncoding Autism		16	16	6894419	6895298	880	98.6% (1 x 2)	TCTCTAATTCTGTGAGAATGCCTTCCCGAATTTGTGCCTTTATTATCTTTTGGTTGGACTCCTGGGAATCTGTCTCATGTTTCTGTTCACACCTGCTCTCCATCCCAACTAGAGGTACTCCCAAAGTGTACCCCCAAAACAAGAAGTATTTCTGAAAACACTTGCCCCATTTGGGGTTCTCAGTGCAATTTCGTGACAGTTTTAAACTGACACTTTCTCTCACTTTATAACAGCAGGCTAGAGAAAAATAAGAAACTGATAGCCTCGACCTCACTAAAACATTCATGAATTAAAATTTTGTAAAAAGGTTACCAACAGATTGTATCAGTTTAGTTCATTTTTTTCTATTATCTTAAAAAGCCATTTTCCCTGTGTTTGTAATTGTATTTTATCATTTTA…	0.360227272727273
190_NCASD	CAGGAGGCTGAGGAGGGA	59.634	GCAAACTCCACAATGGACTGT	59.044	917	190	chr16:6947296+6948212	Noncoding Autism		16	16	6897295	6898211	917	99.4% (1 x 2)	CAGGAGGCTGAGGAGGGAGAATCGCTTGAACCCAGGAGGCAGAGGTTGCAGTGAGCCGAGGTCGTGCCATTGCACTCCAGCCGGGGTGACAGAGCGAGACTCCGTCACACACACACAAAAGGAAACATTTGCATTGACTGGGGCATGTCCTGACACAGATTAAAACGTGATGTGGCTTCCCACTGTATTTAAGAAAATGGTCAAGTCCAGAAGTCCAGGTTGGGTGCAGTGGCTCACGCCTGTAATCCCAACACTTTGGGAGTCCAAGGCGGGCGGATCACTTGAGGTCAGGAGTTTGACCAGTCTGGCCAACATGGTGAAACCCCATCTCTATTAAAACAAAAAAAAATTAGCTGGGCTTGGTGGCACGTGTCTGTAATCACAGCCAGTTGGGAGCCT…	0.48309705561614
191_NCASD	GTCTTTTCCAGTTTTAGCAATGTGC	59.824	GGTCGAGAGTCATGGGCTAAG	59.932	922	191	chr16:6950579+6951500	Noncoding Autism		16	16	6900578	6901499	922	99.8% (1 x 2)	GTCTTTTCCAGTTTTAGCAATGTGCTGAGTGTCACAGCAGATGCTATTCCCTCTGCCTGGAATTCTACCCTTCTTGACCTCGTCCCACCAACATCACTATTCATTCTTCTGGTCTCAGAATCTGTATTGCTTTCTCCATGATGCCGTTCCTATCTTTCGTCTAAACTGGGATCTTCTGTCTACGTGTAAGACCCTCTCCTCTTCCTTCACAGCACACAATGCCATTCCTAATATTCCACTTAACATGTTATGGTTGTTGAGTGTTTGTCTTTGTGTGAGCTCCATGAATGCAGGGAGCTACATATGTCTTGTGAACTGCTAGATCCCCAGCATTTTGCACATGGTAAATGCTAATGAAAACATTTGTAGAAGGTGTGAATGCCATTTAAGATGTTCCCA…	0.443600867678959
192_NCASD	ACGTTCCTACTACCTTTGGGG	59.095	AGAGTAGCTTTCCATTTCAGTTGT	58.375	920	192	chr16:6951393+6952312	Noncoding Autism		16	16	6901392	6902311	920	99.4% (1 x 2)	ACGTTCCTACTACCTTTGGGGAAGACAATAACACAGAGTCCAAGAGGTCAAAGGGTGCCTGGCCTATGTCTGCCCCTACGACTCTTCCTTAGCCCATGACTCTCGACCTGGAATGACAGCAAGTTCATGTCTAGTTAAGCAAATCCAGAGAAGATTTTTGTTTATGTAGTGGAATGTTCAACTCCTCAATTATGCTGTGAGAGGCTGAGGGGGAAAAATAGACATTTTTGCAAAATCTGTTTCTGGTAACCTTCAACAAACTAAAACAGTTGAGCATACAGAATTTTCTGTTGTTTCTGCAGAGATAATTTGTTACATGGAAGCTCATTTGCTTATTTGAAGTAAATACTGCTTCAGACCCAGTAGAGATTAACACTCATAGATGAGATGGATTGAGAA…	0.384782608695652
193_NCASD	CCATCATTGCTTATCTGTCTTTGA	57.311	CCACCTGGCCTAAAGATGGA	59.081	889	193	chr16:6953441+6954329	Noncoding Autism		16	16	6903440	6904328	889	99.3% (1 x 2)	CCATCATTGCTTATCTGTCTTTGAATTCTCTAGTGTCTAGTGTTCAGCAAGTGCTGGTAAAATAAATACATGATGTGGGGGAAGCACTTCAATAGGATGTGAGCTCGGAGTGAGTTCCAGAAAGGTGCCCCGCAATCACTTATCCCAGAAACTGGTGGGGAGGTTTCAGTCAACCTGTATAAATGCTCCTGGGGACTGTCCTTTGGATAAGCAGGTGTTCTCTTTACCTAAAAAGAGATGCCTTTCAGAAAGTCTTTAAGGGCAGCAGAGCAAGCACTGGGAGGGACTAATAGGACCTCAAAAGAAAGAGGTGAGAGGCAGAGGGCTGAGGGCCTTTCGGAGCTGCCGCTGCTTAGCCAGAGGAGGGAAGCAATTGCATCCCCAACAGGCGGGCTGTAA…	0.479190101237345
194_NCASD	GGTGAATCCTCCTGTCCACTG	60.066	GGGGATCCACCTGCCTCT	60.368	918	194	chr16:6954420+6955337	Noncoding Autism		16	16	6904419	6905336	918	99.7% (1 x 2)	GGTGAATCCTCCTGTCCACTGAAAGTACAAAAATGAGCTAGGTGTGGTGGTGGGTGCCTGTAATCCCAGCTACTCGGGAGGCCGAGGCAGGAGAATTGTTTGAACCCAGGAGGCAGATGTTGCAGTGAGCTGAGATCATGCCATTGCACTCCAGCCTGGGTGACAGAGTGAGACTCTCTCTAAAAAAAAAAAAAAAAAAAAAAAAAAAAAGAAGAAGAAGAAAGAAAAATTCATACATCTTGTACCTGAGGACTGTTTGGGGAAGCAGCTGCTTTTTCCCGTCAGTTTCTCCTTGGTTTTCTCTACTCACAGGGACCCTCGCCTTGCACCTGCTGGGAAGGCCAGTTCACCTGCCCGGGCTACTTGTGTTACACAAAGCTGGAGGAGAATGAAGTCAAA…	0.423747276688453
195_NCASD	AGTGAGCCAAGCTGATGCC	60.378	ACCGAGTTTTCAACAATCATTAGGT	59.232	872	195	chr16:6955495+6956366	Noncoding Autism		16	16	6905494	6906365	872	99.7% (1 x 2)	AGTGAGCCAAGCTGATGCCACTGCACTCTAGCCTAGGGGACAGAGTTAGACTCCATCTCAAAAAAAAAAAAAAGTGTAGATGTTTGGTTACCCCTTCAAATCATCTAGCTAGTAGGTTGGACTTTGTGTTTATTCCAATTTTCCCCGTTTAGCAACATTGCCCCCACCATCACCACCAAAAGGGGAAAAAAAGACAGTGGGTTAATCATCCCTGTTAGAAAGAATTTCTCTCCAATGCCTGAGGCAAGTTTGCATGCCATGGATGGAAATGGTATTTTCAAGAGACAGACTGAGCCGGTCCTGCCTAGGAAACCTGCTGCCTTGGCACGGTGGTATTAGTGGCTGAGGGCTGTATGTTTATTCCCTGGCCCTCTGCTGATCCCTGGAAGCAAAGTGAGT…	0.447247706422018
196_NCASD	ATAGTACAGGTGGTCTTCAGATGTG	59.872	AAAATTAGGCGGGCACGTGT	60.892	916	196	chr16:6961878+6962793	Noncoding Autism		16	16	6911877	6912792	916	99.9% (1 x 2)	ATAGTACAGGTGGTCTTCAGATGTGGCCAAATATAGAAGACACAGTGTAAGATTTGGGCAATACTTGGTTCACCAATCCTTTGAGGCTTGGGAGTAGAAAGAACAAGAATAAAGATGTTAAGTAGAGTAAGATGCATTCTTCAAAGATTCCTTTTTGTGGACCATTTCTTTGAGAGAGAAGTTTTCTTCCTGTGAATAAATATGCTGTTGCTTTTTTTAGCTCTATCATTTATACTTACTAGTATTTCAGAACTTTACGTTTGAGTTCTATTTTCATGCCATAAAGAATGAGGTAAATAATCTGAAACTTAAATTCCCACGTGGAGTAATTTCTCTAATGTGGAGTTTCTCAAACTTGAGGGTACGTCAGAAGCACCTGCTGGCATTGTTAAAATGAAG…	0.40938864628821
197_NCASD	TGCTGTCTCTTCCGGCAAG	60.005	TCCCTCCTAGCCCGGAAATT	60.327	923	197	chr16:6963387+6964309	Noncoding Autism		16	16	6913386	6914308	923	99.8% (1 x 2)	TGCTGTCTCTTCCGGCAAGCCACGGCATTGTTTGAGAACATCTTTCCTCTCATATCCCCCACCAGACCCTGAGCATGTTGCCATCGGCCTTCTTCACACCCCCACAACCCTCGGCCCCATCATCTGCAGTGCCCGATGCCCAGCACTGAGCCCAGTGCCTGGTGTTCAGGGTGTCTTTTGAAGGAGAAGTTATAAGTCGGTAGCATCCCCAAGCTTTTCCCAGAGCAACTCAAGCCCTGAGGCCACCAGATTGTTTGGGCAGCAAGTTGGTCTCCTAGAAGCCCTTGGTAGACCTGGCTCCTTGCCTAGCTGGGCCAGGCTCTGTCCTCCCCTGCGTACCCTCCTAGCCAAGCGTCTGGGCAGCCAGCGGTTAAGTCCACTGTGGGAAGCTATTGAGTC…	0.463705308775731
198_NCASD	GCAAGATCCCATCTGTACCAA	57.718	GGTGACAGAGCAAGACACTG	58.494	900	198	chr16:6964694+6965593	Noncoding Autism		16	16	6914693	6915592	900	98.7% (1 x 2)	GCAAGATCCCATCTGTACCAATAAGCTGAAAATTAACCTGGCATGGTGGTGTGCACCTGTAGTCCCAGCTACTTTGAAGGCTGAAGCAAGGAGGCAGAAACAACAAGATCGCTGAAGCCCAGGAGTTCAAGGCTGCACTGAGCCAAGATCGCAACATTGTGTTCCAAGCTGGGCAACAGAGCAAGACCCTCTCAAAAACAAAACACAGATGGATAGGTTTGAGACAGCCCTCACTCACATAACTTTTAGAGAAGTAAATCGGATAGTGCCTGCGTACTATTATTATTACAGCACTATTGCCAGGCAGCAAGCAGGCCCAGGGTGGTGTAAGTCGGCTTTGCTCATCCGTAGATGAAGGATGCAGAACATTCCTCAGTTGACTAATGTGTGAACTGCACA…	0.471111111111111
199_NCASD	TCTACAAGTGCTTTTGTCCTTGA	58.224	TAGGCCTGGGGTGGAGTC	59.959	918	199	chr16:6967415+6968332	Noncoding Autism		16	16	6917414	6918331	918	99.7% (1 x 2)	TCTACAAGTGCTTTTGTCCTTGATGTGTTTCATTTGGGGAATACATCCATTTCTGTCTCCGCCTTCTTTAAACCTGAAAGGAAGAGAGTTGGTAGAAACACTCTGTCCAAAGGAAGATCAATGCTAACAATGTTCATTTTTCTAAGTGTCTCCTTCTTCTGAAATAAAAGTTAGGAAGCTCTGACACCGGCTCCCTTCCTGCCTTCTACACCGAAGTGGGAGTTAAGATGTTCCAGATACCATTTGCTGTTTTGAAGGAGGGTCTGTGTGCTGTGTGATGAGTAGACTCTTCCCCTTTGCTTCGATGGGAACCTCGGCATTCCAAGTGGACATATTTCATATCCTCAGGGCTTGTTCTCCTCCTCTGTGGATCTCAGTAGCAGACCTTCAGCTGCCTCT…	0.468409586056645
200_NCASD	TACCGAATCAGACCACTGGG	58.808	TCCCAGCCCAGCACTTTG	59.884	930	200	chr16:6968331+6969260	Noncoding Autism		16	16	6918330	6919259	930	99.7% (1 x 2)	TACCGAATCAGACCACTGGGCTTGGTGCCATTGTTTATGAATTTTTAACAAGCTACCCGGGTGATTCTGGGGCCCACTAATATTTTTGAACTGTAGCTATAGGAAGACTTCATACATGCAGAGTAAAACCATCTTAAATCCAATCAAATTAATTGTTAATTAAATTAATGTCTGCCTGGGCCCTAATTCATAACTTTCATGTTGCAATTCCCTCCTGATATCCAGAGGCATCATTTAAAGAATAAGTAACCAGGGACATAAAAATGAATTATTTATCTTACCCAAATCTCATACCCTTCTCAGTGAAAATGTGGTTGCTTGTCACTGAGTGTCCTACCCAATGGGCATATCTCTGGTCGTTTCAGAGAAAGAAATCATTCTCTGCCTTCCGAATGCAGA…	0.437634408602151
201_NCASD	ACATTTGTAGCGGTGTTATAGGC	59.125	AAGCGTCTCACTCTGTTGCC	60.601	915	201	chr16:6976495+6977409	Noncoding Autism		16	16	6926494	6927408	915	99.8% (1 x 2)	ACATTTGTAGCGGTGTTATAGGCTGCAGGCCAGGGAGAGGCTTTCTGGAAAATTGCAGGGAGAAATCCTGCAGGCTCTGCCTTTGAAAGATAATGCTAGTTGCATGCTGGGGCTGTCTCCTCCCTTTGTCTTGAAGGTGTAGAAGACACAGCTTTGCGGGCTGAGTAAACATATGTGCATGGTTAAGGTAAAAATGCTACTTAGCTCTTCTTCCCGTTAATTCGTTCAAGAACTGGTGAAAGAGAGCACACTTCTTGGAGACTGAACTTTTAAATGCTTCTGCTGGGTCTCTTGAGTTCTTAAAATTATCGTTTTGATCTTTCTGTCCCGTGCAGATACAAAATACATAAACATCCACGTGACTCTTTTTATTTTTCACTTAGAACCTGCGCATTGTCC…	0.475409836065574
202_NCASD	GCAGATTTTAGGGCACTGTAGC	59.644	CAGGGTAACTGTAAGACACATTGC	59.846	921	202	chr16:6977691+6978611	Noncoding Autism		16	16	6927690	6928610	921	99.7% (1 x 2)	GCAGATTTTAGGGCACTGTAGCAAGGCTGATTATAAGTCAGTGCCCTATGTAAGGCCTGGAACCTAAAATCTCCAATCATTGTTTTTGTTCTGTTGAATTAAGCCACCACCCTAAAGAGCCAGAAGCCTAACACTGAAGGAAATAGAAAATGTGGATCTCACAACACATCATTTCAAGTGTGTACATATACTAATAGCATACGCTAAACATCATCTAAACACTAAATATAATGATATAATGGCATTGGTCATAATCTTGAAGGTAGTTGCATCTCCGTAAAGTTTCCCATTGAGCTGCTGTTCCGCTGCTGCTGGCTTCCACCCCCAGCACCCACCCCTCTAGATTTATAATTTCCCCAACTTGGGTTGAAGCCCCAGATGACTGGGAGCTGCTTCTTT…	0.447339847991314
203_NCASD	TCACATTGTTTGATTTCTTTCCGC	59.018	ACACACTAGTTATGCAAGCTGG	58.662	920	203	chr16:6978764+6979683	Noncoding Autism		16	16	6928763	6929682	920	99.5% (1 x 2)	TCACATTGTTTGATTTCTTTCCGCTATGAAAAGACATATGCACACAGAAAAAGAACAGTAACACACACAAAAAAATCAGCCAGTTAAAACCACCACCACCACCATCATCACCACAGAAACTTAGAAATGGAGCCCAGTAGAGCATCAGTTGTCAGATATGGGGGCTTCAAGTCCCCAAAGCAGATGTCATCTCATGTCATTGGGAAGTAAAGATGTTCACGGTGCAAGCGTCATTCACAGACACGCATGCTTGAGTTCCAAGGGAGCAGATGTGAGCCAGTTAGGAAGACGCCAGGAAAACACCATGCTTGCCCCACTCCCCAGTCTAGTGTTTAATTCACAGGCCCACATTGCAACTCTTCAATACTTTATTAAACACATCTCTTCTCCTGGATACCC…	0.422826086956522
204_NCASD	CCATGTGACTTCCAACAGTAGA	57.728	CGGCATAAAACGGAAGGCAA	59.476	906	204	chr16:6985390+6986295	Noncoding Autism		16	16	6935389	6936294	906	99.4% (1 x 2)	CCATGTGACTTCCAACAGTAGATCATAAAAAGGAAATCTTTTTCTCTCTCTTCTTGTCAATTTTCTTTTGCAATAATGAATGATTACTGTTGTCTTAAGCCATTACATTTCAGGGTAATTTGTCTCATGGCAATAGATAACTCACACTTTCAGTAGTATTTGCAGCCAAGATCTGTTATCCTTGAATATTCAAAAATCTGTGACCTATCCCCATTGTGCATGTACACACAAGCACACGCTCCCCTACATACTTTGCTGACATCTTATTCTTAAATGTAATGTGCCTTATTCAAAGGGTGATTAGGAGGTTTGAGAATCAGTGTGGCAGCTAAGCGAGACATCTTCCTTGTTTTAATCAGAAGAATGGAAAGTGCTTTGTAGAGGCGAGGTGGACTGTCA…	0.421633554083885
205_NCASD	ACTGCGGGCATTTCCTTAGA	59.382	CCACAACAGTCCCAATGAGA	57.433	874	205	chr16:6986072+6986945	Noncoding Autism		16	16	6936071	6936944	874	99.1% (1 x 2)	ACTGCGGGCATTTCCTTAGATCTGAGGTTCACTTTTTGCTCCGGGGGTTCAGCTTCTGTACACTTGATGGATGCTGGTCTTAATTTGGTGTGTTGCAGTCATTGCGAGTTGTGCAAGGATATTACCTTAAGGATATTCTTTTGAATATTAAATTAGAATAAATTAAGGGATGCTGGATATTAAGCCTAAATCAGAGATGAGTAATTGCCTTCCGTTTTATGCCGTTAAGTTTGTTGGAAATGCAAGATATTTGTTTTAATTACCAAGTTGTTGAACCAACTCTCAATGAGCATAGGCACAAACAGAAACAAATAAAAACTTCTTGGTGAGTTTGTGAAATGTAGATAACACCTAATTGGATGCATTTTGTTAGTGCCTGTCCTATTATCATTACTTTCT…	0.371853546910755
206_NCASD	CCAGCTACTTCGGAGGCC	59.5	GATCTCACTACCGCACTCCA	58.9	896	206	chr16:6995775+6996670	Noncoding Autism		16	16	6945774	6946669	896	99.6% (1 x 2)	CCAGCTACTTCGGAGGCCGAGACGGGAGAATCGCCTGAACCCAGGAGGCGGAGGTTGCAGTGTGCTGAGATCAAATCACTGCACTCCCCACTGGGTGACAGAGCAAGACTCTCGTCCCCCACAAAAAAGGAATCTGCTGGTGCTAACCCTAAGCCCCCAGGGGCGTTTACCATTTCAAGGCATTCTGCCTCAATTTCCACAAGTGTCTTTTGGCCTGAGGTCTTTCTGGAGCCTCTGGAGCCCCCTTTGCCTACACAGATGCTTCACTGGAAATGTGAGGGAATTAAAGCACCCTTTCCCCAGCAACCTTCAATGGGTAACTCAGGATTTGCTTTATAAATAACCCAGTTTTCCTTGCTTCTCAAGTGGGATAACTCATGATTAGGGGTTGGCAAGTGT…	0.463169642857143
207_NCASD	TGGGAGCCATTTGAATGTGT	57.693	ATGAGGTGGACTTTGCAGTG	58.098	924	207	chr16:6996947+6997870	Noncoding Autism		16	16	6946946	6947869	924	97.3% (1 x 2)	TGGGAGCCATTTGAATGTGTATTTGAATCCCAGCCTGACCAGTTTCCTAGCCCTGTTGGGTTGAGCAAGTCCCTTCACCTCTCTCCTGGCCTCAGGCTCCTCATCTGTAATTGAGAGAAGGTCTGTGCTTTCTCAGAGAATAGTTAAGAGGATTTAATGGGATAAGATCTGTTAAACTCTTAGCACATAACCTGGCCCATGTTCAAGGTCCAATAAATCACTGGCTGTGATTTCAACTCTTTATGTGAAGGATGCAGTTTATGGCTGTCTTTTAGGAATTGGCCAAAATGATGAGTCAGAAGCTCTTCTTATTTTCCTGTTTTTCACCTTGATTTTGGAGTAAGGTCACCCTTCCCACAGGTAGGGTGTGATTTAACAGTCTTTAAGAGATAACATTAT…	0.433982683982684
208_NCASD	CTCAAAGGAAGGGATTCTCGAT	57.586	GCTACCTACGCTGAGGATGA	58.68	930	208	chr16:6998991+6999920	Noncoding Autism		16	16	6948990	6949919	930	98.9% (1 x 2)	CTCAAAGGAAGGGATTCTCGATTAAGAAAAGAAATTCGACTCTATGGAGTGTGATTCGTAAAAGGGAGAGTAAGGACAAAGCTATTGTCAAGGTTTCTTTATCCTCTGAAATGTAATTATTGACTTTTTTTAAAACATGGATAGGGATATGTAACTGATGCCTTCCCCCACCCCCCTGAAAAGTCTAAGGTCTAGAATAAAAGCTACAAAAGCTAAATTCCAGGATATAGAAACAAGCCTATAAAAAGCACCTTCATCAACAAGAAACAGGCTCAATTTCACAAAACAAACCCATAAAGGGAGAAGAAAGACATGTACCAGTTAGTTTTCAATCTTCGCTCACCTTTTGTTCCTTCCCTTCAGTGAAACAGGCCTTGCTGATGGGTTTTACTCATTCCA…	0.412903225806452
209_NCASD	CAGTGGGGACGATCAGAGGT	60.973	CGAGAAGGTCCTTGCCCAAT	60.035	918	209	chr16:7007535+7008452	Noncoding Autism		16	16	6957534	6958451	918	99.8% (1 x 2)	CAGTGGGGACGATCAGAGGTGACTCTCATCACCATCTTGGTTTTGGTGGGTTATGGCATCTTTACTGCAACCTGTTTTATCAGCAAGGTCTTTATGACCCGTATCTTGTGCCGACATCCTGTCTCATCTTGTGACTTAGAATGCCTTAACCTCAGGGGAAAGTAGCCCAGCAGGTCTCAGCGTCATTTTACCCAGCCCCTATTGAAGATGGAGTTGCTCTGGTTCAAACATCTGTGACTGTTGGGCTGGGATACCTTAGGGAAAGCCAGGCATCTCTCTTTTCACACAGCCTCTTTGTGTAGTTAGCCTGGACTTCCTCCTAGCGTGACAGTTGCAGATTAGTCAGAGCCCTTAAATGGCCCCTCCCTTTTCCATGCAGGACATCTGTGACCTAGCCCG…	0.479302832244009
210_NCASD	CGTTAGCAGGCTGGGCAAT	60.75	TTAATTTCTGAAAAGACAAAGCCGA	57.97	881	210	chr16:7008251+7009131	Noncoding Autism	Via online Primer3.	16	16	6958250	6959130	881	99.6% (1 x 2)	CGTTAGCAGGCTGGGCAATGCTTTGCTTTATGAGGCAATTATTCCAACACACTCTATTCAAAATACACATTAGAACTTAACCTTCTGAATCCTCAAGTAGCATTTTTATCACCCACCATTAGAAAAGAGATGGAGTCAGCATATTTCCCCCCCTTTTTATGATCGGGTATCATTAATAAAGCATTGGGCAAGGACCTTCTCGCAATTCCTCGGGATAATTTGTGACACAAAAGGCGTTCTGTGATACAATGGTCTGTTGACTTATTCAATAACAGAGGAAACACATGGATTGTTTTAAAAAATAAAGCCAAGGAATTAAACAACCAAACGGAATATTTCCTTTCAACAATGGGAACGCACGCTCAGAGTAGGGATGTGATGCTATTGGCTATGCATAAC…	0.350737797956867
211_NCASD	CGGACCTCAAGTGATCTCCC	59.54	ACTGTGATCATGCTCCGTGG	60.11	926	211	chr16:7015564+7016489	Noncoding Autism	Via online Primer3.	16	16	6965563	6966488	926	99.7% (1 x 2)	CGGACCTCAAGTGATCTCCCCAACTTGGCTTCCCAAAGTGCTGAGATGACAGGCATGAGCCACTGCGCCTGGCTGACAAATCCAGTTTTCACTGAGTTCTGGAAAATGTGAGTCCAGTGACTATATTATCTGAACTTAAAAAGTAGATGTGATTGGCTCCAAATGGGAATGATAATAATCATGTTTATTATCCTGGGGTGCTTTCTCCATAGCAAGTACTCACTTAGGTCCTGTTCATTAGTCAGTCTTTTAATCTGTACTGAAATAGGTGCTGTCGCATCCATGGGGATAAGGAAACTGAGGCATGGGGGGATTAAGTTGTTTGCCCAAGGAAATGCCGGGAAATAGTAGCAGAGTTGGCATTTAGCATCGGGGGATCCAGTGCCAGGTTTTTAATGG…	0.476241900647948
212_NCASD	CCTGCCCCTCAGTACTCAGT	60.616	CTGCTCTCAGGAAACGGCTA	59.467	929	212	chr16:7017600+7018528	Noncoding Autism		16	16	6967599	6968527	929	99.8% (1 x 2)	CCTGCCCCTCAGTACTCAGTACACTTCGCTGTTGAACAGCGAAGTGTGTGTTCAGTAATTATATTGCTCTTCTAAGGGCCTGGTTCAAGACATTGAACACGGTAGGTCCTTGGTCAAATGGGTCTTCTTTAATTGTTTGTGCCCATCTGCCCGTGCAGCTGTGGGACCCTGGGGAATGTGTGGGAGGCAGCAGGTGACCAAGCCCTGAAACTAAGAATGTAAGGGGACAGGGTTTAGAAGCAACCAGACATACTTCCTGAAGAATTGGGTTGTCAGTCTGAAAAAAGATGCCCCAAATCACTGCTCCAATTCCTCCCACCAACTGTTCAGCTGCCCCGGGTGCCAGAAGGATAAAAACGCTCGGGGAGAGAGGTTGGCAGTTCTGCTGATGACAGCGGG…	0.502691065662002
213_NCASD	GGGTCAGGATTAGGGTGCAT	59.153	CATGGGTTTTTGATTTTGGGGT	57.902	917	213	chr16:7019313+7020229	Noncoding Autism		16	16	6969312	6970228	917	99.4% (1 x 2)	GGGTCAGGATTAGGGTGCATTGAGGGAGGCAGTGTCATGCAGTGATTCCATATTTAACTTAAAAATTTGGATATTTTGTTCATGATGCATATTTCACAATGAATAATTGTGATTTTGTACAACATTACATTCAAATAAGGTGGCCGGGTGTGGTGGCTCATGCCTGTAATCCCAGCACTTCAGGAGGCCAACGTAGGTGGATCGATTGAGCTCGGGAGTTTGAGACCACACTGGGCAACAAAATGAGACCTCGTCTCTACAAAAAATAAAAATAAAAAAAAAATTAGTTGGGCATTATGGTGCATGCCTGTAGTCTCAGCTACTCGGGAGGCTGAGGTGGGAGGATGGCTTGAGTCTGGGAGGCGGAGGTTGCAGTGAGCTGAAATAGTGCCACCTCAC…	0.440567066521265
214_NCASD	CCCATTTCCTCCTGCCCTTATT	60.091	GCGGATCACTGCAGGGAATTA	60.475	917	214	chr16:7020962+7021878	Noncoding Autism		16	16	6970961	6971877	917	99.9% (1 x 2)	CCCATTTCCTCCTGCCCTTATTTGATCATAGAATGTTTAACAGTTTCCTTCAACAGATATTTCTTGAGAACCATACTATCTAATCTGTCCAAGACATAATGATGAAAAGGACACATGCGTTTCCTGATTGGATGGTAGTTATAATCTAGCGGAGGAAGACAGACATTTGACAATTGAGTGGGTCTACTAATACATAGGAAGGAAATTATTGGGAAAAAGTATCCGCTATACAGAGATTTTAAAATATAGAAAGAGGTGTGCTAAAAGGCAGCTGAATTGTTATGGGGATGGGATTCTTCTGGAACACCTTGGGGATTCATATGTAAGCTGAGATAGGAAAGCGAGGACATGTCAGCCACAGAAACATCCATGGAAGAGCAATCCAGGCAGCAGGAACAG…	0.44711014176663
215_NCASD	TAAAAGATCACCAGCTGTTACATG	57.258	TGTATCCATTCCACATAAGGGAA	57.015	890	215	chr16:7021578+7022467	Noncoding Autism		16	16	6971577	6972466	890	98% (1 x 2)	TAAAAGATCACCAGCTGTTACATGGAATATGGTGTACTGATTGGGGGCGGAGAATGGAGTCAAACATTCCAATTAGGAAGCCATTGCAATAGTCCTGGATAGAGATGACTGTTGTTGGGGTTAGGGTGTTGTTAGCAGACCTGTGGGAGTGTGGACGGATTGGGGACATCGTGGAGATGTCACTTAAGTGGAGTGTCCACAGTCCTGCTTCTGTTGGGTGTGGAGGGCGAGGGAAATAGGATTCAAGGCTAAGAGCAGAGAAGTGTCTGATGGAAGAGTCTAATTCCCTGCAGTGATCCGCTGGTACCCTTTACATCAGCAGCCTCAGTGGGGTGGTGAGATGGGAACTGGACCGACTTGAGATGCGGGAGAATGTGAATGAGCATGGAGTCCGTGCCA…	0.441573033707865
216_NCASD	CAAATAAAAATAGTTAGCCCAGCAC	57.244	CAGGCACAGTAAACCACCA	57.587	900	216	chr16:7022970+7023869	Noncoding Autism		16	16	6972969	6973868	900	98.5% (1 x 2)	CAAATAAAAATAGTTAGCCCAGCACGGTGGTAGGCACCTGTAATCCCAGCTACTTGGGAGGCTGAGGAAGTAGAATCAGTTGAACCTGGGAGGTGGAGGCTGCAGTGAGCTGAGATTGCACTACTGCACTCCAGCCTGGGTGACGGAGCAAGACTCCATTGTCTAAATAAATTAAAAATTTAAAAATAGAGACAAGGCCATCAGCTTTGAGAGAGTGTGTGTGTGGTGGTGGGGGGCGGGGTTGGAGGATATCAGGGGTTCTTCCCCATTAATAGCATAAATGATTAACAGTAAGTACTTGGAATCAAGTTGATGCATTTTCTTATGTGCCATGCAGACAAAATAAAGCTCAGCTTTGTTGTCAGACAAAAGCAGCACTTATTACAATGGTTGGCATTT…	0.397777777777778
217_NCASD	CACCTGGCCCATAAATCATATTCT	58.67	GGTAGGCAGATCACTTGAGG	57.39	881	217	chr16:7024637+7025517	Noncoding Autism	Via online Primer3.	16	16	6974636	6975516	881	98.9% (1 x 2)	CACCTGGCCCATAAATCATATTCTTTATTTGCATTTCTGGAAGACCATCAGGAGGGTAGTAACATTTATTAAATGTCCCTTTCCATATTTTTCTTATCTCTTAACTGAAACTCACCAGAGGCAGGCACCAGAAAACCCCCTGTGTTTGCAAACCTTGATGAAGTTTGCCAGTCACTCCCTTGGCTTGTAGTCCTTTTACTTCCATTTTACTCGCATTCAGTGCTCCCTGGAAGGTGTTTCTTTCTGCAAATAGCTGCGTGAGAAATCCAGCATGTCCTGGACCCTCCCTCTTTTAAAACACTTTTTTAAAAGGATTGTTCTAAAAGAATCTTCCTCTGCTTCTGCTTCTAATTCTGGAAGAAAGGGTGGAGCTAGGTGTGTTCACATGGTAGTACTTTT…	0.439273552780931
218_NCASD	TTGCTCTGCTACAAGGGTTT	57.34	ATTACCTCCACTGCCGTATG	57.09	921	218	chr16:7027259+7028179	Noncoding Autism	Via online Primer3.	16	16	6977258	6978178	921	98.6% (1 x 2)	TTGCTCTGCTACAAGGGTTTGTGATAAAGGATTAATTTTCTTAATTATTGTGTTTTGCAAGAATTGATATTATGATCTTTGAAGCAAAATTAGGAATGCCTTTGTTCTCTAGATACCGGGATATCTGGACACTCGCAAGTCTGGTTCTGTTTAGCAAACATTATTTACTTGTTCCCTTAACCATACACATCTAGAGGCCAGGAATGCCTGACTTCCTGAGAATGCAGCCCAGCAAGTCCCAGCCTCATTTTCCAGCCCTCACTCAAAATGGAGTCACTGTAGTTCGAAGACCTCTGACAATTGGACACACGTCTGTGGTTCCTAACTCAGGACAGATGGATTTCTGTGGACTCCAAGCTTCCAAACGGCAGGCCCCCGGCTGGTCATCTCTTTAGCTCT…	0.471226927252986
219_NCASD	TGAAATGAATTGAAATTGTGGGTGG	59.003	AATATGTGGAAGGCACCCAA	57.082	915	219	chr16:7027704+7028618	Noncoding Autism		16	16	6977703	6978617	915	99.2% (1 x 2)	TGAAATGAATTGAAATTGTGGGTGGAGGAAGGCTGAATAAAGGCCATTTCTCTGAAGAAAAGAAAGAAAAAGAAAGTCATCTTATCCCGTAGTCAGTGTGGATTGCAGGCACCTTTGGCTTATTTGCAGTATCTTGAAAAGCTGCTTCCCAATCTGGTCTGAGAGAAACACGTGAGCTGAGGGGACTCTCTAGGGAGATCCCAAGAGGAAACTGCCTCTTCCAGCCTCCCCAGGGAAAAAAAAAAAAAAGGCAAACCTCCTTTCCCAATGTGGCTGAATGTGTCTTTGCAAGACACTCAGCATTCTTGTGTGTTTATTTTCTGGGTCCCCCAAGCCCCGCCCTCCCTCTAACCTGCCCCGTACCCCGCCCCCCTTCATGTGGGTGTCAATTACAGCTGA…	0.451366120218579
220_NCASD	CCCGCACCAATGACTAAACC	59.19	TCACTCTTGTCACCCAGGC	59.25	882	220	chr16:7032103+7032984	Noncoding Autism	Via online Primer3.	16	2	160462636	160463774	1139	99.6% (2 x 2)	TTCACTCTTGTCACCCAGGCAGGAGTGCAATAGCGCAATCTCGGCTCACTGCAACCTCTGCCTCTCGGGTTCAAGCGATTCTCCTGCCTCAGCCTCCCGAGTAGCTGGGCACCCCCATGCCCAGCTAATTTTTGTATTTTTAGCAGAGATGGGGTTTTACCATGTTGGCCAGCTGGTCTCGAACTCCTGACCTCAGGTGATCCACCCGCCTCGGTCCCCCAAAGTGCTGGGATTACAGGCGTGAGCCACAGCACCTGGCCAGCCAAAATCATTTCTAAACTTAGATAGACATTTCAGTTAAAGAATGAAACCCCAAAAAGAATGGAAGAGATGGGAAGTTAGAAGGCAGTCTAACATTTGTTATTTACAGTATACATGAAAGGAAAATCATAGCAAGGA…	0.454784899034241
220_NCASD	CCCGCACCAATGACTAAACC	59.19	TCACTCTTGTCACCCAGGC	59.25	882	220	chr16:7032103+7032984	Noncoding Autism	Via online Primer3.	16	2	241756549	241757948	1400	99.6% (2 x 2)	TTCACTCTTGTCACCCAGGCTGGAGTGCAGTGGCGCAATCTCGGCTCACTGCAACCTCCATCTTCTGGGTTCAAGCAATTCTCCTGCCCCAGCCTCCCGAGTCTCTGGGATTACAGGCGTCCACCACCAGGCCTGGCTAATTTTTGTATTTTTAGTAGAGACAGGGTTTTGCCATGTTGGCCAGGCTGGTCTTGAACTCCTGACCTCTGGTGATCTGCCCACTTCGGCCTCTCAAAGTGCTGGGATTACAGGAGTGAGCCACCGTGCCCAGCTGTTTTCCTGTCAGTTCTTTGGAGCCTTGGAGCGAGGTGTCTAAAAGGCCAGCTTATAGGGCAGGGGTGGGGGCAGTGCTGGGGGTGTGGAGCATGGCTTTGGGGCCTGACAGATATTCACTCTGGC…	0.522142857142857
220_NCASD	CCCGCACCAATGACTAAACC	59.19	TCACTCTTGTCACCCAGGC	59.25	882	220	chr16:7032103+7032984	Noncoding Autism	Via online Primer3.	16	16	6982102	6982983	882	99.6% (1 x 2)	CCCGCACCAATGACTAAACCAAATTAGTGATACGAAGAGTTATCCATGTTTATGGTATTGGATTGTGTATTCTCTGGCATCCAATTTGAGAAACCTGAGAATGGTCCTGTGGTTGGCTATCAGGTACCCGGGGAGAAATGTAGCTGCTTTCAATTTGAAAACCCTTTTCCAGGTAACAAAGATTGACCTACATTATTCCATTTTGATCTTTACAGAAACCCATTCCCATTGTTGGCCAGCATGTCATTTTGACTTTTGTTGGTTTTATTAGTGAGAACACTGAATATCATTCCAGAGTCAGGGCTCTGATCCTGGAGCATCAGTCATGTCTACTTAAGTCCTTTCATTGCAGCGAGCTCCTTCTCATTCGTTCATGAGAGTCGTTGACGAGGTGGATCC…	0.454648526077097
221_NCASD	AGGAAAGGTGTCGAACTGAGG	59.655	AGTCACACAACACCTTGTCCA	59.719	881	221	chr16:7033018+7033898	Noncoding Autism		16	16	6983017	6983897	881	99.6% (1 x 2)	AGGAAAGGTGTCGAACTGAGGCTCGAGCATTTTGGTAAGTTATCTAACATCACATTACTGGGGAGTGGCCATGCTGAGACATGAGTTACAGTTTTCCAGATACCAAAACTCTTAGCTGTTCCATTGACAGCTTCCTAGCAGGGATAGCACACCAAGCCTCTACCCTTTCCTTGGGTAGTACTCATCCTCTGACTCTGTCACCCGCTTTATCCTCTTGGTGATGGCAGAGCTACTTGGAATCACTAGTAACTGCATTAGAATGATGTGCAGTTGTCTATCCAATGAGTTTTGTCCATTATTTCTTTAGCCGTAAATAAATGAGGAAAGTACAGAATTATTGGTGGGGGGTGGTCTTTGAAAAAGCTAGGGTGGGAGAATATCGAGAATGATATAATTATC…	0.435868331441544
222_NCASD	TCATTTGCTTGGGTTCAGGA	57.326	TCCAACCCTGCATTTAAGATGA	57.685	930	222	chr16:7043390+7044319	Noncoding Autism		16	16	6993389	6994318	930	99.3% (1 x 2)	TCATTTGCTTGGGTTCAGGATTTGTAGAGCATATTCTAAATGCATTGCTGGCTGAGGGATCCATCAGAGTGGGAAGGGGAGATGGGGAAAGCCATCCTGTTGCATTGAAGAAACGGAATCTGTGATCAGGAAACCTGGTTAAAGGTCCTTTCCCCTTTGTAATTTTATTCTACATAGGGAGGCAAGAGTGGTGCTGCAACATATGGAGAGACTTGAGTTTAATTGTTAAAATTCCACTCAGCCGGGCCACTTCTTCACTGTGATTTGCACTATTTAGCATTTGTGTGCATTAGGTAATATATTTAATGTTTCTCCCTCCAATCCAATTTGCGTGTGTTTGGCAGCAGCCCAGCTCCATGGGCATGGGGCAGGGGAGATCATAAATCTGCCATCCTGGAG…	0.444086021505376
223_NCASD	ACCACCACACCTGGCTTG	59.804	AGAACCTGTCAATACGATGCG	58.459	915	223	chr16:7056600+7057514	Noncoding Autism		16	16	7006599	7007513	915	99.4% (1 x 2)	ACCACCACACCTGGCTTGGTTTCGGGTTTTATAGAGACAAGGTCTCCCTGTGATGCTCATTCTGATCTTGAACTCCTGGACTCAAGTGATCGTCCTTCCTTGGTCTCCCAATGTGCTGGGATTACGGACATGAGCCACCATGCCTGGCAATTAATTTGATTAAGAAAAAGTAAACCCTATGCAGAAGAGAACACTTAGCAAAGTTAAGTCACCTGCCCAAGAACCCTCAGCTCCCAAGCAGTGGAATCACACTTTGAACCCTGCCATTTTCTGTCTGAGCCTTTGTTCTGCCTTTAACATCACCTCCCCATATGGACGCACCGTCTTGTCTCTTCCATGTTTTCGTAGTCTTAGTTTTCTACCACTGCCAGAAGTACCACACATTTGGCACCTTGAAAT…	0.432786885245902
224_NCASD	CTCTTTCTCTCTGTCCCTCTTTC	57.93	GGCAAACCGTTATAGAAGTTAACT	57.27	896	224	chr16:7059205+7060100	Noncoding Autism	High mispriming possibility. Via online Primer3.	16	16	7009204	7010099	896	98.9% (1 x 2)	CTCTTTCTCTCTGTCCCTCTTTCTTTTTTCTTCTTGTCTACTTCCTCTCCTTCCTCTCCTTCCTCTTCTTCTCTCTTTTCTCTCTCACTCTCTGTCTCTTCCTTCTTTCTCTTTCTTTGTACATGTATAATTTGAAGACCCTGCGCCAAGCAGTCTCTTGGAATTAGAAGCACCTTAAAATGAAAAAAATGTCTCGCCACTGTGACAAATCCACAGGCCTTGCAAGAAACCCTGCAGATCACTAACACACGGCCATAGGAATATATTGACTGCAGCCCAAGCACAGGAGAAGATTAATCAATCCAACAGACTTGCATTAATTGTGAAATGGAAGGGATGATGCGATCAATGATAGGAATGAAAGTGCAGCAGTAACGATGCCACATCCAGCTAATCCAA…	0.391741071428571
225_NCASD	TCAGCTCTGTAACCTGCTTGC	60.61	GCGGTACCAGAGAGCCATTG	60.81	880	225	chr16:7059773+7060652	Noncoding Autism	Via online Primer3.	16	16	7009772	7010651	880	99.9% (1 x 2)	TCAGCTCTGTAACCTGCTTGCCTTGTGAAAAATAATACTAGAGCTAACGTGAAAAGTTTGTATTTTAATCAAAGCAAACTACGAATATTAAAATATTCCTGGGCTATTTTGGTGCCGTTTAGCTGTGAACAAGTTTAATAATTTATAAATGGTTCTTTTGCCATTGGCTACAAGGAAAAAGGGTCCAAAGCTATATTGGGAGGTAAGGCTTCCTGTGCTAAAAATCAATTAGACTTGATAGAAGCTCAGAGAACTCTTAAGAAAAAAAAAATGCACTCAAGAGGCCCTGGGAGAATTCAAATTTAGTTAACTTCTATAACGGTTTGCCTAAGGGCATGAACTCTATTCTTTGCTGCAAAGCACGTGATCATTCCAGGAGGGGTGAGACTTAATCAGCTG…	0.405681818181818
226_NCASD	GAAGCTGTGCACACTGGATT	58.758	TAATGGCATCCTCCCTCCTC	58.265	920	226	chr16:7062730+7063649	Noncoding Autism		16	16	7012729	7013648	920	99.8% (1 x 2)	GAAGCTGTGCACACTGGATTAGAGGAGAAGTAATGTTTCCTTTCAAGTTTTGACCCATTTTAACAAACTGATATCTTAGTGTGTTCAGGCTGCCATAACAAAATGCCGTAGACTGGGTGGCTTGAACAAGAGCTATTTATTTTCCCATAGCTGGGGAGGCTGGAAGTTCAAGATCAGGGTGCCAAGATGGTCAGGTCCTGGTGGAGGCTCTCTTTGTGGTTGGCAGATGGCCACCTTCTCAATGTGTCTTCAGTGGCGTTTCCTCAGTGTGTACAGGTGGAGAGAGAGAGAAAGCAAGCCCTCTCTTTCTCTCCTTTTAAGGGCAGTAATCCCCTTATGAGGATCTTACTTTTATGATGTTATCTTCTCAAAAGTCCCATCTCCAAATGTCTTTAGACT…	0.431521739130435
227_NCASD	TGTTTTTCTCTGTTGCCCAGG	58.969	TTGCAAAGACAGTTATCCCCT	57.193	926	227	chr16:7063684+7064609	Noncoding Autism		16	16	7013683	7014608	926	98.7% (1 x 2)	TGTTTTTCTCTGTTGCCCAGGCTGGAGTGCACTGGCACAATCACTGCTCACTGCAGCCTCAAACTCCCAGGCTCAAGCAATCCTCTTATCTTAGCCTCCCAAGGAGGTGGAACTACAGGTGTGCACCAACATGCCCAGTTAATTTTTTAAAAACTTGTAGAAATGGGGTCTCACCATGTTACCCAGGTCATTCTTGAGCTCTTGATCTCCAAAAATCTTCCTGCCTCAGCCTCCCAAAGGGCTGGGATTACAGATTTGAGCCACGGCGCTTGGCTAAAATGCTATATACTCTATTCCGTACGTCAGTATTCTCACTAAAAGAAGGAAGAGTAGGTTTCAAGGAACTTGAGGATGAAATATGTAACAGTATTCACTCAGTATATTAAAAATAAATACACA…	0.428725701943845
228_NCASD	GAAGAAGCCTTTCGGATACTGA	57.875	GCCATCATTCTATACTTGGGCC	58.915	918	228	chr16:7066371+7067289	Noncoding Autism		16	16	7016371	7017288	918	99.4% (1 x 2)	GAAGAAGCCTTTCGGATACTGAAAACAAGGCACTGAACTTAAATTCTGCAGACTGGATTTAAATCTGGGCTCATGTTTCTCACTTGTTTCGGGACGTAACCTAAGTCACTGAACTGCCGTGATAACAGACACAGCCACAGTGTATTCAGCACACCTATGTGCCAAGCATTGCACACAGCGTTTTGCATATATCATCTCACGTAATTCCTCCAGCCACACTTCCACTTGGGTAGACACGCCTCACTTGGTGGATGTGGAAACAGGCGTGATACACGATGCAAAACCAGAAAGTGGAAATGCTGAACTTGAAGTCACATGTGACTGATGCCTATTCCCGTATTTTTCTTTTTTCTAAAGTGGAGTTGATTAAACTGTCTACTTCACTGGGCCGTTTTAGGA…	0.444444444444444
229_NCASD	GCTGTCACTTGACCCTGTGT	60.179	TGTTCTTTTCCCAGAGGGTGA	58.868	915	229	chr16:7066880+7067794	Noncoding Autism		16	16	7016879	7017793	915	99.4% (1 x 2)	GCTGTCACTTGACCCTGTGTACCAACCTTGAAATCCCTCACTGGCATTTTGGTAAATTTGTTTCATGTTTTTGTCCCATCAGTAGTAAAGGTTTCACCATTATTTTCATTTCCTGGTTGAGCGACCCTCTTTCTTTCATGACTTTTGGCTTCATCCTTCAGCCTCTTTCTCTTTTTTTATTGTTCCATGTTGCTGTGAGCAGAACTCATTTTTCAAAAGACAGATGGTGGCAACCCTGTTCTCTCTAAATAAAAAAGCAAAACAGCTGTTAAGGTGCAAACAGAGTCGCGGCCAGCAAATCGTATCTGCTTCAAGTGTTGGCGAAGTTTCCCTTCAGGGAATGGGAGCTATCTAAACAAAATGTGCAGCCTCGGCTGTGCTCTGCCAAGGCCCAAGTAT…	0.426229508196721
230_NCASD	TGCCTAACCTTCTGGGAATGC	60.341	TGCATCATGGATACCCGAGT	58.576	902	230	chr16:7075448+7076349	Noncoding Autism		16	16	7025447	7026348	902	99.5% (1 x 2)	TGCCTAACCTTCTGGGAATGCATCCTAGTAGGTCTCAGCCTTGTTGTACCCAGCCCCTATGGAAGATGGAGTTGCTCTGGTTCAAACACCTCTGACAAAACCGGATCCCAAGACATAAGATTGTGCAGTGTGCATTTGCATGCTTCTCAGCCTCAGAGCTAAGGAGACCTGGGCATGTCCTGGGGGGGTTTTGGATAGAGGGGGGCACCTCTTCATCAGGGGTGCTGGAGAAGGCCTGGCCTGGCCTCTGGAGCCTGCCGCACTGCCAGTCAGGACATCCTAGCTGAGCAGGAGCCATGGGCGTCCCGGGGAATCCTAGGTACTGAGAGGAGATGGCCAGCAGATGGCGCTGCAGGGATTCAAACTGGAGCAGCCATATCTGACAGCAACCCCAGGTCA…	0.549889135254989
231_NCASD	GTAATACCGGAGCTGGCGG	60.3	TCCACCTTCCTTCCCTTCTT	57.87	926	231	chr16:7076910+7077835	Noncoding Autism	Via online Primer3.	16	16	7026909	7027834	926	99.7% (1 x 2)	GTAATACCGGAGCTGGCGGCCTCCCAGGAAGGCTGCAAAGTGCTTGGGTGCTTTGCCCTCTCTGAAGCATACATCAGCACCCCTAAGGTTTAGCTGTGCTGCAGCCACAGCCCACACACTCCTCCATTCTCCCTGAACAATAGGACCCTTGCTGAGATAGTCTGGTAGGAGAGGGGAGGCTCTTTCCTGAACCCGTCTCTCCTAAACGCTTTCTATGCCTTAGAGTGCTAAGAACAGTCTACCCTCCTTACGAGACTGAGTGTTTCCTGAAGGCAGGAGCTGTATCTTATTGAACTCTCCAGCGCACAGAAAAAACTCATAAATATTTGTTCAACTAATAAACAAGTAAATGAATAGAGAGGATGAATAATCTTTTAGGGTAAGTTAATTACATCTATT…	0.407127429805616
232_NCASD	agagaaggaaggagggagag	57.15	TGCTGGCTTTGTTGATCGC	59.42	897	232	chr16:7077925+7078821	Noncoding Autism	Via online Primer3.	16	16	7027924	7028820	897	99% (1 x 2)	AGAGAAGGAAGGAGGGAGAGAAGGGGAAGGAAAAGGAAGGAAGAAACAAGGGTGGAAGGACGAAAGGCAAGAAGGAAGGGAAGAAGGAGAAGGAAAGAAAGGAAGCCTTATTTAATCTCCAGCACAGAAAGTGTTCGCAGCCCTGAGAAACGTGGTTTCTCATTTGCCTGTTACTTGGCACAGTTTGACTGCCTAGAAGCCTGCAGAAATATTGGAAGTCAAGGTCCAATATAATAATTGGCTTACAGATTTGAAGAAGGATAGATAGACTCTTCCATTTCCAAGATTCATTAGTCCAGCTTTCTCCGTAATAGACAGGGCTTGCTCTACGTGTAAGCCATTTTCTAATCAAATTGGCACACAGTTCATGCTCTGACTTGGTATAAATGGGCTTCTGTG…	0.438127090301003
233_NCASD	GTCCACTGTGGGCCAAGTC	60.601	ACAGCCTTCTACAGTCCAGC	59.389	916	233	chr21:42016447+42017362	Noncoding Autism		21	21	40644521	40645436	916	99.7% (1 x 2)	GTCCACTGTGGGCCAAGTCTTCACTTCAGCCTCTGATTGGTGGTGGGCCAATCTTTCATAGGGTGTGACTAACTGGAGGCCTCGAAAGGGCACCTAGGGGTGTTACCAAATTCTTTTAGCTTAATAGAAACCCTAAAGAACATTGCATTCGGGGCTCTTGAGCTGCTTGCTTGAGCCTGCTCCCACTCTGTAGAGTGTACTTTCACTTCAGTAAAGCTGGACTTTTGTTACTTCGTTCATTGCTTCATTCCTTGTTGCATTTTTTGTGGATTTTGTTTAGTTCTTTGCTCAATGCACCAAGAACCTGGACAACTCACAGTCAAAACGTTCCATCCCTAAAATCTGAGGAGATATATAGTCATTCTTCTTTTTAAAACAGTTTCAAAATACAACTGCCAA…	0.396288209606987
234_NCASD	TGGACCACTCGAAATTCCATTAC	58.741	TATCAACAGCTCAGCCACGG	60.108	916	234	chr21:42019433+42020348	Noncoding Autism		21	21	40647507	40648422	916	99.7% (1 x 2)	TGGACCACTCGAAATTCCATTACATAAATCATAGTCCAAAGTCAGGTTCTCTTGTCTAAAATAGCAAAATTTCTAGTGATAGGACAAAAATTTAATAGTGCTAGCACAGTTATAAGACAAAATCTTTGGTGTAGTTAGGATAAAAACTATATATTATTTGAGAAATTATGTCCATTCAAAATATTCCTTCTAGAACTACATACCTTCAAACCTCATCAGATAATAGTAGCTAATAGCTATTTTTCATTTCATAATGCAGAAACCCTAGGACCTTTCAACATTAATACAAATGTGGCTGCTTTATATAATGCCTCACATCTGCATGAAAAATAAGACACCCAACAGCATCCAGCTGACTCTAAATGTCCAGATGCTGGGAATGATTCACCCATGTGTCTT…	0.37117903930131
235_NCASD	AGGGCCATACTTCCCCATTT	58.681	GAGTGCTCAGATGACTTACCTT	57.536	929	235	chr21:42023932+42024860	Noncoding Autism		21	21	40652006	40652934	929	99.6% (1 x 2)	AGGGCCATACTTCCCCATTTAGTTGGTGGCATTCTTTTCTCAGGGGAAAAGGTAAAAGATTATAAAGGAGTGAGAAAGTCAAGTTACTTTTAGCTGGTGAGAACACATGGACACATGGAGGGGAACAACACACACTGGGGCCTGTTGAAGGGTGGGGGTGGAGGGAAGGAGAGGATCAGGAAGAATAGCTGATGGATGTGGGGCTTAATACCTGGGTCACGGAATGATCTGTGCGGCAAACCACCGTGGTACCTGTTTACCTATGTAACAAACCTGCACATCCTGCACATGTGCCCCTGAAGTTAAAATTAAGGTTGGAAATTTGAAAACAACAACAACAACAAAAAAAAAAAAAAACAACTTCTAGCTATAAGAATCCTGCTTTGAGCTTCAAAAGCC…	0.461786867599569
236_NCASD	TGGGTGACAGATTGAGATTCCA	59.088	ACTGAGAGTATCTCCACAGCTG	58.977	919	236	chr21:42025995+42026913	Noncoding Autism		21	21	40654069	40654987	919	99.4% (1 x 2)	TGGGTGACAGATTGAGATTCCATCTCAAAAAGAAAAAGAAAAAAGAAAAAAAGAAAAACCTCACACCCATTACATACATGAAAAACTGTTAGCTTTTTAACCCAATCACCAATACGATATTACTGTCTGGTAAAAATATTTTTGTTTTCCTTTAAAAATCATATTGGCTATCAGGGAAATGGACCCAAATATGCAGATGGAAGTTGTTTATCAAGAGCATAGAAATGGAGCTCTAGGTTGAGTCCTAGAAGCATGCTCTCTGCTTTCTGGTGCTAGTACAAAATCAATAGCAGTACTTTCTCAGCACCTCTTTGATGTCAGCACATGGCACATGTGAAGCAAGAGGCTGTTCGATTTTGATTGTTCACTGCACTAAATTTTTACAGCTGCGGTAACAAA…	0.414581066376496
237_NCASD	CCCACTGCTCAGTCCTATCAC	59.862	AGACATACTATGGTTCAAGTCCCA	58.97	873	237	chr21:42028054+42028926	Noncoding Autism		21	21	40656128	40657000	873	99.6% (1 x 2)	CCCACTGCTCAGTCCTATCACATTGGGTTTTAGGTTCCACCATATGAATTTTGGGGGGACACATACATTCAAACCAGAGCAACTCTTATTTCATTTTGTTCTTTCTACCCCCTTTTGAAGGCTACATTCAACCTTTCTTAACGTTTCCATTTTATTTTCACACGCAAATGCTGATGATCTTTAGTTTCCTCACCAGCCCCTTCAAAATCCTAATGTGAAAATGTTCATCGCTTTTTGCAAACCACACAGCCAAGCCCTGTTGTGCATGAGTGAAAGCTGTTGTTGCTTGCTTCATTAATAGCCACACTGTCAAACAAGCTGTGTGTGTTATTTCTTCACTCCATCCTCAAGTTGACAAGAAAAAAGCTTAAATGCACTAGAAGATGCTTCAATAGAAAA…	0.38602520045819
238_NCASD	GGTGGATATCTTTCTGGACCCT	58.951	CCTGTGTCTGCAATACAAATGT	57.228	922	238	chr21:42029089+42030010	Noncoding Autism		21	21	40657163	40658084	922	98.9% (1 x 2)	GGTGGATATCTTTCTGGACCCTAATGGGGTAGGTAAGGTTGCCTTACATGACCTTGTGTGTGTTGAAGCCTAGAGAGGCATGAACAGTGTATATTCATGGGCAGGCATACTCTGCCTAATCTTCTATCCCCAGAGGTTACTTTTGAGCTGACACAAGGAATATATCAATAATTAGCCCTTAAGATGCAATTCTCTGTTGGTCTAATTACTCAGGCCATTTTCACAGGCAATAAAAGCAAATAAACCAGGGTACGACTCCTTTTAAAATGTAAAAGGAGTAAAAAGCAACATTAGTGGGCTAGTTCAAGTGCCTTTCAAACTGCAAGAAAAAGAAAAAGTGAAATGGACCAATTCCAGGGCTTTATTTTCAGCTGAGAACAGGATACCAGAGGGCTGCAC…	0.398047722342733
239_NCASD	CAGTTGACTGATGGATGTCACC	58.994	AAGTGGATTGGGGGTGTTCT	58.842	900	239	chr1:112477609+112478508	Noncoding Autism		1	1	111934987	111935886	900	99.6% (1 x 2)	CAGTTGACTGATGGATGTCACCTTTGCTTCTTGACTCTAAACTGAGTAATCACTGGAGGTCACCAGACTTAAAGCCAAATCCATCTATCTATATGGCATACTTGAACATGGGGTATGTCCATAAACACAAGTCTTATGGTTTTCATTAGATTCTCAAATTCCCAAGGACGAACTTTATTGAAATATCATTCATAGAGTCACTGCCATTGGGAACCTTTTATATATTTAATAACCTTATAAAAAAGTCTTTTGTATACCTCATCAACCAAACCCTTTCAAACTGGTCCAGCCCAACCTACGTCATGCTCCCTGGCTTGATGGCAGGGAGCTTTCTGAATTGATTTTAGAGCCCACTCTCTTGGCTTGTGGATTATTTGTGCAACCACCTGCTTCCCTTAC…	0.413333333333333
240_NCASD	CATTCTCAAGTGGCCTTATGAGC	59.685	GGAGTATAAAGGGGAAAAGTACACT	58.045	916	240	chr3:115748717+115749632	Noncoding Autism		3	3	116029870	116030785	916	99.5% (1 x 2)	CATTCTCAAGTGGCCTTATGAGCCCCAAGCACTGTCCCAGGAAGTCAGATGTACAACAAAACAGTCCCTAGAGACTCATCCAGACAGTTGCTACCATCAAAAAGGAGGGTTAATTTGAATTAGATGGCTCTAAATAACTTAAACATGGTAGCCATGGGACAAAGAAATGTTACGTAGCTCATTTATATACCAACCAGTGGTGAATGTTCTCTGCTGGTGACACATGTGTAGCGTGGATATCTGCAAACTGAGAGTCCCTTAGTCTACCTAAAATCAAGGTATATTAAATTGAAATTTTTCTATATGTATTAAATGTTCACGATCACCTCAGAATCTAAGCGAGTGTTCTAGTTCAGAAAAGGGACAAATTATCCAGACACCAGCAAGTGCATTCAGCTA…	0.399563318777293
241_NCASD	ATGACCATTTGCTACTGGTGC	58.91	ACATGAAGTAGTTAGCCATACTGA	57.21	900	241	chr3:85885443+85886342	Noncoding Autism	Via online Primer3.	3	3	85836293	85837192	900	98.9% (1 x 2)	ATGACCATTTGCTACTGGTGCAGATAATAATTTATTCCAGTGAAAGAAAAGAAAAAACTGTGGTCACATATGGCTTCAGGTTTTGATTCTTTCTATCTTCTACTGACTGCTAACAATAATTAAAATTTTTTAGAAACAACCTGATCAAGGCCTAGAAAACCAGTCTCCATCTTCAATCAATAGTGGAGGTCAGGATTAATTTGTTGTTTTAAAATGTGGAAATTACTCTCTGTGTTTGAGAGCAGTATGTGGCACCTCTTAACTATATGACAAAAAGGGCCTTGAATTTCACTGGATGTGTGTGGCATAAAGGATATCTATTTGGAGAGATTTAATGGGACTGAAATAGAGGGTAATGGATACTGAATTGGGGTAATTTATGTTGTGCACTGAAGAAGA…	0.344444444444444
242_NCASD	TCCTGCTTCAATGAGGCTTATGT	60.054	TGTGACCAGATAAAGTCAAAAGCC	59.481	918	242	chr5:87798023+87798940	Noncoding Autism		5	5	88502206	88503123	918	99.8% (1 x 2)	TCCTGCTTCAATGAGGCTTATGTCTGCATGGGTGTGCTACTCATTGAACACAAATATAAAGGTGCCACCAGACAAGGAGTTTTTCTGGTTCATCATTGCACTGCAGGATGCCATGAAGGAGTCACAGGCTGTGGCTTCCATGAAGCCCGTGACAAATTTAATACCCTATTACTTGTGTCGTCTGCACTAGCACTTCATTTGGTGACATCACTGGGTACAACTAAAGTTGAAATTTGTGTGACATTTTTGCAGGTGTTGCTTTTCACCAAAAATGTTATTTTACATAGTTTAGCCACAGTGCAGTGCTTTAAGTCTAGAACTAAACCTCAGGAAATCTAATGAGGTTGAAAAGAAAAGTGAAAGTTAACGGCTGCAGCTTTAACAAAGGCTCATCCTCCC…	0.406318082788671
243_NCASD	GGAGTCGCGGAAATGGATCA	60.18	AGCACTGGACAAGCTCTGAG	59.68	893	243	chr5:109026677+109027569	Noncoding Autism	Via online Primer3.	5	5	109690976	109691868	893	99.7% (1 x 2)	GGAGTCGCGGAAATGGATCAAACCGAACCCACCTAGGCTTTTTTTTCTTTTTCTTCCCCGCTGCCTCTGAAGAGAGAGAAGTTTATTTCGTGTTGCGGCCCTTTTAGATGTGAATCTCTAGGTTGATTTTAGTGTCGTCATTCTTCAGCTATTACATCTGGTTTGTTTGTGGCAGACAGGGGGAACCGAGTGGGGAAGCGCGTGTTATACTCCGGCCGAAAGCTGTGGGGCGCTCAGTCCTGCGTCCAGTGGTTAAATTGGTAAATGAGTTGGGAAGACGACCCATCCAAAGTCTTATTTAAAGTTACCAAAAATAAGCAAAGCGGACACAGTCTGTTCCCTTTGGAAGGGTATCCACCGCGCGGCATGTGCGAGTTCAGTTTCAAGTTACTTGCCAAT…	0.417693169092945
244_NCASD	CAGGACCACTCCAGGAGGA	59.921	TCCGATTCCTGCCCCAGA	59.96	928	244	chr7:131012169+131013096	Noncoding Autism		7	7	131327410	131328337	928	99.8% (1 x 2)	CAGGACCACTCCAGGAGGACAGCACATTAGCTACTGCCCTCCAGCTCCCTTCAGTGTTGTTTCCGTAAAGGACTTATAAACTGGCGAGGGCGGTGGCTTCCAAAAGCGCACAGGCGTCCCTTTTCCAACTTGGTCTTCTTATTTTCCCTTCCTGCTCCATAACTACAACGTGTTTCTGTTCGTAATCATCTCGGCTTTTCCTTACCTCTGCTTGTAAGAAAAGTCCTTTGCGCCATTCCCCTCCAAGCCCCAGGGAAGGGCCTGGAAAGCGCTTACACCTCAGACCCAGTGTCGGTCAGCCGTCAAGGAGCGAGCGACGTGGGAAACCCTGAGATAGGACATTGGCCCGGCGCTGGGCTCGGGTAACGATGCGGGGCGGGGAGCGCGGGCGGCCGGGGA…	0.641163793103448
245_NCASD	GTGGTTTTCAACTGGGAATGAA	57.336	CCTTGGCTCTTCCCCCAG	59.32	919	245	chr10:75610148+75611066	Noncoding Autism		10	10	73850390	73851308	919	98.8% (1 x 2)	GTGGTTTTCAACTGGGAATGAATTTGCCGCCCGCCCCCCCCCACCGCAGGGGACATTTGGCAATGCCTAGAGAAATTTCTGGTTGTCACAACTGGAGGAGGGGTGCTCCCAGCATTTGGTGGGCAGAGGCCAAGGATGCTTCTAAATGTCTGCCACAATGCACAGGAGAGGCCTCACAACAAGGAAGTACCTGGCCTAAAACGTTAGTAGCACCAAGGCTGAGGAACTTGGCCTAGAATATAGACCCCCGTCATCAGGCACTATCTGGTATATTAAGCACATCTGCAGAGCATCCCAGTGTATGGGGCTGGGTGGCCTGGACTTACTATTCCTAAAATCTGATGCTGGGGATGCCACAAGAACCAAGGGGTCGTACTGGGTCCCTGGGGGCTGAAACTC…	0.552774755168662
246_NCASD	CCGAGAGTGGGATCCTACCA	60.106	TCTGGTCCTCTTCTTCCACC	58.354	927	246	chr12:122232732+122233658	Noncoding Autism		12	12	121794826	121795752	927	99.6% (1 x 2)	CCGAGAGTGGGATCCTACCAGCTGGGGTAGGAAGAGCCCATTTCTAACAAAACCCCCAACAGCAGCATGGTTGGGGGCAAGTGGCCTTCGTAGTTTCCTCAGATAGGGGCTGGCAGGACTCAGGATCTTTTTGCTGGCGACCCCACCCCGAAGACTCCCAGTTTTCAAGGTCTCGGCAAGGGTCATGTAAACCTCACTTCGTGGAGGAAAACCGCCAACCTGGCAGTTCCATGGTCAAGGTTCTCACAGTGCAAGCAAGGCACGGTCTGACCACCAGAGGGCAGCAGCGACCGCCCACAGAATCCCAAGACCACAGCAGAGCTGGGAAGGGGAGGCCGGGGAGGCACCCCAGGTTCTCAGTGGACGCCCTCTTCAGGCACTGGGCAAAGGGTAATCTCC…	0.594390507011866
247_NCASD	CAGACAACCCCTGCCACC	60.28	TAATATTGTGTCGTTAGCCACCA	57.91	910	247	chr15:99123800+99124709	Noncoding Autism	Via online Primer3.	15	15	98580571	98581480	910	99.7% (1 x 2)	CAGACAACCCCTGCCACCTCCTCAGAGCAGGATAGTCCCCATGAGCCTGGTCACTAAGTACACACTTTGCTCTCTCCTCTTGAAAAGCAGGTATCTTAACGGGTGCAAGCCTCTCTGAGCTTCTAGTCCTATCCAATGTTGACTCTTACCCAACGTGGCAGAGCAGAAGCCACAAGGAAAACGTAAATGGAGCCCACATCCCCCGCCAGAATGCTCGCTGCAGCCAGACAGCTGGCCAGGACACTGTTGTCAGTGGGGGATGTGCGTGTCACTGAGGATTCCAAGGAATTTGGCTTGTTCTGCGCTCTGCCTCTCCAGCTAAATGAGTTCCACTTATACCCCGCACTACGGGCTCTGTCGATTAGGCAAAGTGGTGGTATCCCTTCCCGGCACAATTGA…	0.415384615384615
248_NCASD	TCTTCCACAGAAAGCAAAGTCA	58.12	AAGGATGAGATGAGAAAGTCCCG	59.87	900	248	chr16:13549191+13550090	Noncoding Autism	Via online Primer3.	16	16	13455334	13456233	900	99.6% (1 x 2)	TCTTCCACAGAAAGCAAAGTCAAAGTCCATTTTGTCCTCCACTCCCAATTATATTGGCTTCAAGTGCACCTTCAATGTTTTGCATTCACCAGGGATTTATGTAGAAACCAGTAAAAAGGAGTCCAAAGAAAAAAAGTGACACAAATGTTCACATGGTGGATGAGAGAAGAGAGTAAAAGTGCTCATTGTCATTGCTGACAGCCTGTGTTTAGGAAGCATTTGCCTGGCCCCGGCTGAATCCTAATATGCATGTGGAAATTGATAATTATGTTCATTCAACCCTTTACAAAGTGCCTTCATGTGTTAAGATGCAAAAACATGAAGCTAAGTGCCCAATTCTTTATTAATTCGGTGTGGAGTTTTGCAGTTAACGGTGCCAGGTTTGCATCTGCAATTACC…	0.416666666666667
249_NCASD	GGAGGAATCTGCCAAAGACCA	59.995	CCTCTTGAGATAGGGGCATCA	58.667	907	249	chr17:38286413+38287319	Noncoding Autism		17	17	40130160	40131066	907	99.5% (1 x 2)	GGAGGAATCTGCCAAAGACCAACAGTCTTACTTTATCTTACTATACTTCACAAAGGTTCTAAAATGTGAAGAGTTTACTTGGATTGCAGTAGCCCATTGGTTGTTCATATATTTAAATAAAATGGTCTACAAACTATTTTTCAAACAATAAGGACTATCTTGGGATATCTGAGCTGCTTGGGGAGGGTGTGGGGTGTGGGACCTTGGTCTTCATTCCCTTTTTTTTTTCTTTATGGCTTCCACACAGAGATGCTCCCCTATCTTCTACATCAACCAGTAACTGGAATGTGCCTTCAATCATGTAATATTAGTCTATGTCAGTCACTGCGGTTACTCTGGGGTAATGGTTGGGGAGGCCTTCTAGGATAGAGCCGCAGTCCCAAGTTTCTACCACTGTGT…	0.428886438809261
250_SCN1A	ACCTTGCTCTCACCTGGAAT	58.63	GGAGAGGTGGCACTGATACAC	60.13	891	250	chr2:166909349+166910239	SCN1A	New, previously from #86. Via Primer-BLAST.	2	2	166052839	166053729	891	99.5% (1 x 2)	ACCTTGCTCTCACCTGGAATGACTGAAATCGTCTTCAATGCTCGGAGAACTCTGAATGTTCTCAATGCCGAGACATTGCCCAGGTCCACAAACTCTGTGACGTACCTGTAATAGGGAGTTCACACACAAACACAAAAACAGGACACAAAGAAAAAGCTGTAGGTACAAAGAGCCTATCCTTTACTCTAATCACTTCTTACCTGGAATTACCGAAATAGTTTTCAAAGCTCTCAAGACTCTGAAAGTGCGAAGAGCTGAAAAATTGCCTAGGTTTACAAATTCTGTTACAAACCTGTAGAATTAAATCAGAATTATTCAAGATTTTAGCAGGATTTATATTACTTGCATGGGTCTTTTATAAAGACCTTCTTGGTGATTTTAAATGATAAATATTATAAG…	0.364758698092031
251_Controls	AGTGCTTTGAAGAGTGTAAGAATGA	58.71	AGCTGACCTAGTGTTGAGTACC	59.17	931	251	chr21:30930165+30931095	Controls	Via online Primer3.	21	21	29557844	29558774	931	99.6% (1 x 2)	AGTGCTTTGAAGAGTGTAAGAATGATTCTTATGTTAGTTGTTGCAGTAATAATCCTAGGAGCATACACAGTGGGTGCTCAGTAAATGTTGACTGATGCTTTCCTTCTGCCTCCAGGCTGCGCAATACCTAAAACATTTCAGACAGATGAAAATCTGATCTCTGTTTAAAGTTGGTCTCTGAGAAAGATAATTTTCAGCCTCCTGGTAAGCTGTTCAAACCTTAAATGCTCTTATTCTCTCAGAGTTTTACTTTAAATCTCTCAGGAGGTACATTTCCAGAGCTGTTGTCCTGAGTGTCTCTAAGAAGCAAAGTCTTCAATTTTGTGTTGTGACTCTGCCAATCTTTGATTATGGGACAGAGCTTGCAGCCATAAGGGAGTTAGTCAGGGCAAGACTAGA…	0.345864661654135
252_Controls	AACACAGGGATCCACTCAGC	59.67	TGTCTCCTCTGAAATTGTCCAAGA	59.65	902	252	chr6:157274392+157275293	Controls	Via online Primer3.	6	6	156953258	156954159	902	99.9% (1 x 2)	AACACAGGGATCCACTCAGCCCCCTTAGCTGACTACTGGTGCTTAAAACGGTTTTTGACAAACGCCAGAGTTTCACAAATATAGAAGTAGCAGTTATAGAGGTGGTTTTGCAAGTCCCTTGGAACATTCATGCAGGTCTGCAGTCACTCTTAATTTGAATGAGAAAGAAGATGGTAGAAACTATTTTTATTTTCTCCTGGGAGCAAGAGAAAAGGAAGGCTAGAACTCTGTACTATGTAATTTTAAAAAAAGAAAAAAATCGGACTCCATTGAGATTCTTTCTTGTTTACTTTTTGTTTTACTCTCTCTGTCTCCTAGTATGTTTGACTAATGTAAGTCTTCCCCCAGGAATATGAGAATATGTGGTACCGTCCGCCTCATAACCTTCCTGGATATTTT…	0.376940133037694
253_Controls	CTCACCTTCTTTCCGTGGGG	60.32	CCTTCAGGGGTCAGATGTGG	59.75	919	253	chr6:157557742+157558660	Controls	Via online Primer3.	6	6	157236608	157237526	919	99.7% (1 x 2)	CTCACCTTCTTTCCGTGGGGTCCGGGGCCAGGGACGCAGCGGGGGACGGCGGGCATCAGCCGGGCAGCGCCCGAGCCGTCCCTGGCCGGGTCCCCACACCTGCGTGCTCGGGCATCCCCAGGGTCGGGGGCGCGGTGAATCGTGGTCCCCGCAGCCCGGGGCCCGCCAGGCCCGCGGAGTCAGCCCACCCTGGCGAGGGGCCCAGGCACCCGCATTTAACCAGTCCCGACCTCGGCACGTGGCGGCGCCGGTGTCGCAGACTCGGGCCCACTTCTGGGAGCTTTGGTGCGAGGGGGAAAGTGCCCCTGCGGACGGGCTCGGGTGCCCGGTGCTGCCCCGCCGCCATCCCCGGCACGCAGAGGTGGAGAATGCCAGGCAGCCTGCCGTCCTAATTGGAAG…	0.590859630032644
254_Controls	CTTTCCCTCAACCCTCCCAC	59.96	GGGAAAGGAGTTGGgtgtgt	59.81	932	254	chrX:25019153+25020084	Controls	Via online Primer3.	23	23	25001036	25001967	932	99.7% (1 x 2)	CTTTCCCTCAACCCTCCCACAGAGGCCTGTCCCAGGCTTCAATTACCCCTCACCCCAAGATGCTGTGGGGGTGGCCCTGGGAAAGCAGGTGTTGGGCCATTCTGCCTTGGGTGTGATAGGACACAGCCATGCCCTGAACTGGGCCCTCGCAAACTCCCTGGGGCTCTGCATGTCCTCCATGGTGGAAGAGGTTTGCTTAAGGTTGGGGGGGGGGGGTCAGCCGCTCCCAGCATTGTGACCAAGTTCCCAGATATTGGGGCCAAATTGGGTTGCCATTCATTAATAATGCTCACAATAAGATTAAATCATTCTGGAAAATCTCATAAAATCCCCCTAAGTACGCTCCAGTGGCTCTTTCCAATCCCCATCATTCAGCACTTGGGGAGGTTTGGAAGGAGA…	0.469957081545064
255_Controls	AGAGGTTAGGTCATTGGAAGCC	59.76	GCGAAACAGGGCAGAACAAC	60.32	924	255	chr6:97544815+97545738	Controls	Via online Primer3.	6	6	97096939	97097862	924	99.8% (1 x 2)	AGAGGTTAGGTCATTGGAAGCCTTTTTAGTCATTTTGTGCTTTTCAAGAGCGAATTTGTTAGAATTATGCTGAATACCCACTTAAAGCCTCAGCTGATAACCCTACCTGTGTTTTATAACTCTGCACTGTCAGAACTCATAATAAGTCAAACATTCTTTCAGTGGTGCTCATAAGGGAGGGAAAAAAACCACGCAAATTTAAGAGTAATTTCAGATTGTAAATGAAAAGGAGAGGCACGACTGTTCATTTGCACCAATCATGCCTTCCTTTCATCTGCTCTGATTAGGCCTGGTGCGGTTTCATCAGACTCCTCCATCACCGAGCTGTCACTCCAGCCGTCTGTTGATTGAAAACAATCAAGGCTCTGATGGCACAATTATTCTGACCCTTTAACTAGA…	0.409090909090909
256_Controls	tggtatgggtgaaaacggct	59.6	GAGGTTTGTGGGGAGGAGTG	59.96	909	256	chr6:157624000+157624908	Controls	Via online Primer3.	6	6	157254725	157255633	909	99.8% (2 x 1)	GAGGTTTGTGGGGAGGAGTGTTTTCCTGGAGAGCCTCTCAACATAGATACACTTGTGTGGACCTAAAATCACCCAAGCTAGGAGGGCCAGCCCATCCTGGTCTGCCCTGGGCTGAGGGCTTTCCCAGGAGAGTGAACTTTCAGTGCTAAAGCCAGACAGGGACAGCTGCTCACCCTACCTGCCTCCTAACATCTATCCACGGGTTCTGCATCCACCCTTTGGAGTGGCACAAAACAAAGATGATCCCCTCTTTCCCCAAGTAGACTCTGAGTGAAGACACATCTTAGGTCCACTTCTCAGGCTCAATATCCTCAATTTCTTGGACCTCCTTCATATTGTGCGAGGTGGCAGAGGCTGCTTGCTGATCACCAGGCTCCTCTCCTCTTCTGCACTTTCCAG…	0.544554455445545
257_Controls	TCAGTGAACTCTATGAACCGTT	57.13	TCCTAGGTAATGTGACGGCA	58.14	901	257	chr10:103245371+103246271	Controls	Via online Primer3.	10	10	101485614	101486514	901	99.4% (1 x 2)	TCAGTGAACTCTATGAACCGTTTTTTTTGTTTTTGTTTTTGTTTTTAAATAGCAGCGGTTCAGCTGTTGGGAACCACTGATATATCTGACTGAGGCACTTCAAGATGCTAGAATTTATTCATATTTCTATCTAGCCAGGGAGCTAATAGGCTCGAGCTTGTCTTTGTGGATTGATCTAGATTAGCATGAAATGAGCCCAGTCAGTGTCTTCCTCAGTGAAAAGGGAGAGGTTAGGGGAAAGAGGGATGAAAGAAGAAAGTTCTTCATCAAGAATTGACTGCAGTATTGCCTGCTGATGCATGTCGGATCACCCGCACAGAGAGATCACATGGCTTCTCCAAAAGTCAAACGATCAATTCGCCTCGTTTTGGCTCTGTACTTAATGCACAAACAGTGCGA…	0.450610432852386
258_Controls	TGAACAGTTTGTGGTGGAGCT	60.06	AAGGGTCCAGTTTGAAGTATACA	57.16	900	258	chrX:25017509+25018408	Controls	Via online Primer3.	23	23	24999392	25000291	900	99.5% (1 x 2)	TGAACAGTTTGTGGTGGAGCTTCCTTATAGCAGTTTAATAGATTAACTCATCTCAGCCAGCCTCAAATTTCAGATTAAAATTCCTTCATCCCGAAGGCAGCATTATCAGGTTGTTGGAGGCTGTTTTCAAACCTTGGTTTTGAATAGCAGCGGCTCTGCATTAATTTAACCACTAAGCTAATAAGTAGGTTTCGTTTTGTTATGCTAAGCTTTATTGCTTTTCTTTTGATCAGAATGGTGTTGTTGAGCAAAGCAGCAGACAAGGCATTCTTTGATGAGGGAATTAGCGCTCCATTCTTCCTCTATTATTCATAGCGCAGTGGAATATGTAAGTACCTGAGGGTGTCAAAGGAGCGCAGGTTCTATTGCAAAGTGCTCGCCTTGTTTCTCTCAATAGCT…	0.391111111111111
259_Controls	CGGAAATCATTGCCCCTTCC	59.25	AATCTGGATTGTGAGAAAGTGTTT	57.03	941	259	chr2:166983709+166984649	Controls	Via online Primer3.	2	2	166127199	166128139	941	99.6% (1 x 2)	CGGAAATCATTGCCCCTTCCTTGTTCAAGGCATGAGGCATTTCTTCTCAAAAGCCCAGCCTCAGCCTCAGGAAGCTGAATACCCCTGCAATGCTAGGCTCCAGCAGCAGCCCCGCTGCCTTCTTTCTTCCTGTGGAGTTAAAACTGAGATCTAATTTTTGCTCCGTCCTTAAGAACAATATGACCTCTATTCCCAGCCAGCTAGTCCACTTCCAAAGCACCAGTGAAGGAGGGGGCTTCAACAGGATCAAAAGGGACCTTGAATAGGATGAAGGCAAGCAAAGGCAAGAACTGGCCAGATGCCAAGCTATTTCAGGCCAAAGAATCCCATCTTCTATCAAAATGCTGAACTGCAAAACAAACCTGATTTCAGTTCATGGAAGGTTGAGAGAGGAGGGGG…	0.445270988310308
260_Controls	CGGGACAATCGGAAACTGC	57.89	TTTCACTACCAAGGCGACCC	59.96	923	260	chr9:973641+974563	Controls	Via online Primer3.	9	9	973641	974563	923	99.6% (1 x 2)	CGGGACAATCGGAAACTGCCGTTTTGATTGAGTATTAGTTGGGATGAGGAGCACATACCAGGACTCCCAGATCTGGAGTCCTCACTTTCTCAGCAAGGGCACCTGCATCCTGAGCTTTTACATGTACACACACCCAGCGATTGTGTGTGCCGAGAAAGACCCACATACGCACATTGTTTTTTCCTCTTCCACGATTATCTGCCAGAATTCTACTCAGTTAATTGCGGTTTGAGAACACACCATCCACAGGAGAGCACCAATGGATCTAGTCTAGTGAGGTTACATTTACTTGTAATCCTCCCCCTTCCCTTTCCCATTTCTTTGATGATTTTTCCCATAAGTGTGTAAGCTACTGGGACTTAGTAGAAGCAGGCCGCTCCTCCTAAATGTGATTTGGAC…	0.457204767063922
261_Controls	CGACAATCACCAGAAacctgc	59.8	GGGGCCTTTCACAGAGAGTC	60.04	931	261	chr6:156969168+156970098	Controls	Via online Primer3.	6	6	156648034	156648964	931	99.8% (1 x 2)	CGACAATCACCAGAAACCTGCTCTGTGCCAAGCACTGTGCTGGGTGCTGCACATTCAAAGACAAGCAGAAAAAGAAAAAGGAGAAGAAACAAAAAAAAGAACCTGCAACTGATGGGGCAGTGCCACACGATCCAGATTCGTGAACACCGTTTGTGAAAATTGCTTCAACATCGTTCTGTGTTTCAAACGGAAAACCACCCCTTCCTCCCTCCACCCATGAATCAGTCAAGAACAAAAGGAAATGATTCTGAATTTTTCCTTTCTTTCCAAGCACCTTGGGAAGAGCCAGGCATAGAGCCAAAAAGAAGAGGGGTTTTACTAAGGAAAAACACCACCCTGTTTGGCTTTGATGGGAAAAAAAAAAAAAAGAAAGAAAGGAAAGAAAGGAGCAACTGCATC…	0.46186895810956
262_Controls	ACTGCCTTACATTTTCCAAGCT	58.5	TTTCATCATCCACCCACCCC	59.67	914	262	chr4:54881389+54882302	Controls	MUCH LONGER THAN IN MOUSE (4772bp using LiftOver)!! CAUTION! Via online Primer3.	4	4	54015222	54016135	914	99.5% (1 x 2)	ACTGCCTTACATTTTCCAAGCTTATGTCATAAAAATCGGAAAATCAACTACTTCCCTGGGTAATAATATGCCAATGACTAATTTATTACATTACTTTTTCTGAAGAGTCTTTTTGGCAAGAATTTTAAAGAAAAAAAAGTGCCCTTGTTAACAATGATCAGCAGACCTCACTTGTTTCTTTGTAAAGATAGCCTTTTAGAGGCAGCTCTCCTTTTAAATGAAAATAGGGCAGCAGTTATGGTCACACTTTTTGTTAATTTAGTTGCCAGTCAGCCCCAAATCAAAAGAAAATAAGGCTGCAGAGTGTAATTAACATTCAGTTCGGTCGTTTTGTCCCTTGTCTAGCCCCCAAGCTTTGTTAAAATTGCCATCTGAATGCTGAAGGCTGTAGGGAAATCG…	0.382932166301969
263_Controls	GGAGGCAAGAAGGACAGGAC	60.04	AAATACAGGACCGGCGGAAG	60.11	930	263	chr6:157539193+157540122	Controls	Via online Primer3.	6	6	157218059	157218988	930	99.8% (1 x 2)	GGAGGCAAGAAGGACAGGACGGAGAGGGCGGGTGGGGCACTGGGAGAGGCCAGGGAGCCCATGTTGGCACCAAGAGCCAAAGGCTTCCAGGAGATGCTGCCACAGGGCCCAGGCTGCAGGACAGGCCCAGATGGCAGCAGAGGGTTCCCTCGATTCTGCAATGGGAGCTCATGGACCATGCAGATGACAGGGCCAGCGTTGGGTGGAGGGGGGGGTGGCTGTGCAGATGACAGGGCCAGCGTCGGGGGTTGCTGCCCTTGCCCACCTTCAGGGCCTGCTATGAAAGGCTGCTCCATGGACACGCCCTTTGAGATGCTTCTCAGGACAGGGGCTCAGGATCCCCCGTGCCCAGCTCACTCCTGCTCGGGAAAGCCTGCCCCACCAGCGACCTTGCCTCTC…	0.611827956989247
264_Controls	CAGGTCCACTTCAAGGGCTG	60.61	CACAGCAAGACACGCATGAG	59.83	915	264	chr6:157613906+157614820	Controls	Via online Primer3.	6	6	157264813	157265727	915	99.8% (2 x 1)	CACAGCAAGACACGCATGAGTGTTGCCAAAGTCAACATGCTCAGCTCGCGTGTTTACGGCTGCGGCACCTGCTGCTCTAACGGGGCTCTGGGCTGTTCTGTACATATTGGTTTTGGACAGTGGCTGCGGCGATTTTGTCTTCAGATTTCTTATGGGGGAGATTTAGCATCTGGCAACATGGCCTCTAACTGCGAGGAGTCTCCTAACAAGCACTGTGGTCGGCCGTGTCCTGGAATCGGCCTTCTGTGAGGAGAGGAAAAAAGCATTGCTTAGACAAGGCACTGATTCCGTAGGACAAGGTGGCCCGTTTCATGCCCTATTGGGATCTAATGGGCATCTTAAACTTGCAAGCTCAAGTTGAACTTGGGGGTTTCCTGTTCTCTCCCCTCACAGCCAATC…	0.559562841530055
265_Controls	TCTTGAGTATGTTGGGGTTAGATTG	58.59	CAAATCTGACTGCGTGTTTGAAA	58.65	914	265	chr6:157274310+157275223	Controls	Via online Primer3.	6	6	156953176	156954089	914	99.3% (1 x 2)	TCTTGAGTATGTTGGGGTTAGATTGGGTGGTTGGAAAGCAAAGCTCCAAGTGCTAGAATGGACGGCTGCCCTCTGCAGCTTCAACACAGGGATCCACTCAGCCCCCTTAGCTGACTACTGGTGCTTAAAACGGTTTTTGACAAACGCCAGAGTTTCACAAATATAGAAGTAGCAGTTATAGAGGTGGTTTTGCAAGTCCCTTGGAACATTCATGCAGGTCTGCAGTCACTCTTAATTTGAATGAGAAAGAAGATGGTAGAAACTATTTTTATTTTCTCCTGGGAGCAAGAGAAAAGGAAGGCTAGAACTCTGTACTATGTAATTTTAAAAAAAGAAAAAAATCGGACTCCATTGAGATTCTTTCTTGTTTACTTTTTGTTTTACTCTCTCTGTCTCCTA…	0.387308533916849
266_Controls	TCCAAAAGTATATGCTGGGCT	57.05	ACATATCACTAAGTTCCACTACAGT	57.28	913	266	chr7:13506285+13507197	Controls	Via online Primer3.	7	7	13466660	13467572	913	98.1% (1 x 2)	TCCAAAAGTATATGCTGGGCTTTTTATTGGCATATCAAACAGGGAAGCATTCAGGCCATACATTAGCAAGCAGCCAAGTAATTAATAATAACACACGTGAAAGAAAATGAATATTTTGGTTGAGAATCAGAATGAGAAGTAAGACAAAGGCCTGGGATTCGTGTCCTTGCCCTCAGCAGCAGCAAAAATAATGTTATGAATAGCATTTAACTTGAATTTGCAGCAAACTGCTGCTTTTATCATAAACAATTGCCAGATGGTATACATTATCTTTCTTTTTTCTCCTTTCACAAAAGCAGCATTAATTGCAGAGCAGCCCAGGGCTCCACTCAGCTCATCAGTGTGATAACACTTCATGACCCTGATTAGCCGTCAGTCTACTCAATTAAAAAGATCATT…	0.391018619934283
267_SZ108	GCTGTGGGAGCTAGGACG	59.503	GCATCCCAAACGGCATCAAC	60.458	920	267	chr1:2386650+2387569	Schizophrenia 108		1	1	2455211	2456130	920	99.6% (1 x 2)	GCTGTGGGAGCTAGGACGGGCGGGCACCTGGAACTGGACGTTGGCTGCGTGATGGCCAGTCTAGGCTGGGTGCTGCCCAGAGGCCCGGCAGGTCCCTGTTCCCCGGCCTGGCCTGAGCACCAAGGTGTCGGGGCAGGAGGACCCTCGGCCCTGCCAGGCCCCCTCTGCATCCCTCGGTGTGGGTCCCCAAATTTGGCGGTTCACCCACTGTTCCCAGGGCCTGTGCTAGGTTGGGAGACACCCCTCAGGGAGAGCACGTAGGGGCACAGGGTCCCCAGAGAAGGGCCTACTGGGGGCGCAGGGAGGCTGGCAGCCCGCCTTCCTGCAGGTGGAGTTAGACTCAGTGAGTGTGAAGGATGCTCTGTGGCCACCATAGCTGGAGCAGCTGCCTGTGGGGGA…	0.640217391304348
268_SZ108	ACTGAACGTGCACACAATGT	58.621	TTTGAGAACCGCCCTCTGG	59.625	929	268	chr1:8422210+8423138	Schizophrenia 108		1	1	8362150	8363078	929	99.4% (1 x 2)	ACTGAACGTGCACACAATGTTTTCTTGTCATTATCTCCTGAACTAGACAGTGGAACCACTGTTTAAACTGCATTTACATTGCACTGGGCAGTAGAAGTAACCTAGGGATGATTTAGAGTCTACAGGAGGATGTGACTGGTCACATGCAAACCATGTGTCGATGTATATGAGATTTGAGCACCTGTGGATTTTGGTATCCTGGGCGGTGGAGGCTCTGGAGCCAATCTCTAATGGATACCAAGGGAGGACTGTACTTGGCTCTGGAGGGAGCCGTTCTAACCACTCCCCACACTTTCTGAGAACTTGGGAAGCTTGAGGCAGAGGTGGCCCCCAAGAGTTGGTGCTCGAGCCCCCTTCTCTAGGCCCCCAGCCTTCGGTCTGCAGCCCCTAGGCCAGGAC…	0.552206673842842
269_SZ108	CTGGTCAGGGAGGCACAGA	60.915	GCATGCCCATACTTGATCTTTCC	59.995	916	269	chr1:30431101+30432016	Schizophrenia 108		1	1	29958254	29959169	916	99.9% (1 x 2)	CTGGTCAGGGAGGCACAGAGGACTTGGATGTGGATGAAAGTGAGGACAAAGTGAAATCTAAGGATAAAATAGAACCCATGAGCTGGGACCCACACAGACACCTTGGAACCTTTGTTTGTCCCTCACTCCTTCTACCATGACCCGTGACCTGCAGGGAGGTTGACACCGCTCACCACGGAGCTCCACGTGTTCTTGGTCCAGGACCTGGGGAGGCTGGAGGAAGAGATCCGGTGGGAGCTGGAGAAACCACACACCAGATGGTGCCCATGCCAACATGGTGGACCAGCAGACAAAGCTGCCCCATGCCTGTTGCCCAGCTATGACCTTCAGAGGCCAACAGGCACAGATGCTGCCTGTCTCCTGCCTTCCAAACATGTGCATAGTATTTCTTGTGGACAG…	0.528384279475983
270_SZ108	TCAGGGAAAGGCATCTGCAG	60.035	TCTGATGCTGGGACTCCCTC	60.689	936	270	chr1:30433481+30434416	Schizophrenia 108		1	1	29960634	29961569	936	99.8% (1 x 2)	TCAGGGAAAGGCATCTGCAGGGAAGTTGGGGCTGAGCACGACGACCGTGGGTCTGCGCTGCCCACCCCTCAGAGCCTCAGCTGCTCCAAGAAAAGGAGCAGAGGGAGCTGAAGGCCTCTGGGCCATCACAAGCTCAGTCCTGGTTCTTTCCAGGCTTGTTCCAGTGGCCTCTGTTTTCAGCCCCAGCAGCTGAGGTCTCTAAACCTGAAGGTGCCCAGCTGAACCTGGGCTCTGCTCATCTCCGTGGGCGGGACCTTGGTAGTGAACGAAGGCTGCTCTAGAAGGAGCCTGAGTCCTCTGCCCTGGGGGGTCTGAAGGGACGGGTGGCTTCCACCTGCACAAGGGGAACAAGGGTCAGAGAACCCAGGGGCCAATGCTCTACCCAGGCTCAGATCAACC…	0.606837606837607
271_SZ108	ACGTGGTGAAACCTCATCTAC	57.685	TCAGACTGACCTCCCACTACA	59.572	915	271	chr1:44099632+44100546	Schizophrenia 108		1	1	43633961	43634875	915	98.7% (1 x 2)	ACGTGGTGAAACCTCATCTACTAAAAATACAAAAAAATTAGCCAGGCATGGTGGCAGGCACCTGTAATCCCAGCTACTTGGGAGGCTGAGGCAGGAGAATCACTTGAACCCAGGAGGCAAGGTTGCAGTGAGCTGAGATAGTGCCGCTGCACTCCAGCCTGGGCGACAGAGCAAGACTCGATCTCAAAAAAAAAAAAAAAAAAAAAAAGTAGACTCTAACTCAGGCACGGTGGCCAAGTGGTAATGTGCCTGTCTCGTAGAAATGTAGAATCTTAGGCTCTACCCCAGACCTGCTGCATCAGAATTTGTATTTTGACAGTTCCGTATGGCATTTGTATGAGCATTAAAATTCGAGAAACACTGGAAAGGATAGACACCAAAATGTTAGCACATTGCTGG…	0.451366120218579
272_SZ108	AAGGCAGCCACAATGCTTTA	58.369	CCGGCCGATTTTAGAGTCTCA	59.864	908	272	chr1:73767896+73768803	Schizophrenia 108		1	1	73302213	73303120	908	99.8% (1 x 2)	AAGGCAGCCACAATGCTTTATACATAAATGTGCTTATACTGTCAATGTAAATATGAAAATCAGTGGAAGTGGACTTCAGATATATCTCAGCAGCAGAGGGCCAAAGAAATGGAAGATAAAAGACTTTAATGGTTAAAAAATATACTCCCAATGCTCTAAAGAAGATATACAGTGGGGGGAAATGTGTCCTCAGCAAGAGAATGTGGCTGAGAGTAAACTATTCCAGTTTAACAGGGTGGAGCAGAGTGGGGTACAGAGCGTTTTCCCAACATTTGACGAAGTCACTGTAGAAGCTAGTATGAAAGAATCCCAAGTAGACATCAAATAGGAGATGCAACGAGACGTCAGGGGATTAGCTCCAGCAAAAGCCAAGATAGAACGGAATTAATGGAAAAAGAC…	0.373348017621145
273_SZ108	TGGGGCATTTTCTCACAATGAC	59.438	TGCGGCACAAAAGAATACTATAGT	58.575	934	273	chr1:73824444+73825377	Schizophrenia 108		1	1	73358761	73359694	934	99.6% (1 x 2)	TGGGGCATTTTCTCACAATGACTGGCACATTAGTGCTAAATAAATACATACTGTATATATAAATAAATGAATAAATAAAAGAAAAAATGAACGGTAAATTGCTCTGATTGCCCCAGTATTTACTTAGCTGGTAGCCTGTGTTAGGTGAATAATACAGGAGGATGAATGACTCCATGACTATAGGAAGACATGATACTCAGTGGCAGAGGGCACAGGAGTTATCACATGCATGACTTTAAACATATAGATAAAGTCAGGCATAAAAACCCTTGTCATGCATTGATGGATACAATTTTATCTCTTGAACTATGAGCTTGAATATTTTTATTTATTACATCTTAACTGTGTGAGAAAACATTTTAAATGGTCCATCTTCAAGGCATGATAAATCTGAGCACT…	0.397216274089936
274_SZ108	ACCTGTACAGCCACATGTTACT	59.03	ACCTGTACAGCCACATGTTACT	59.36	897	274	chr1:98501424+98502320	Schizophrenia 108	Via online Primer3.	1	NA	NA	NA	NA	NA	NA	NA
275_SZ108	TACGAGGAGCATGCTTCACG	60.179	TCCCATGTTTCCCATATGAAGTC	58.208	915	275	chr1:98502477+98503391	Schizophrenia 108		1	1	98036921	98037835	915	99.8% (1 x 2)	TACGAGGAGCATGCTTCACGATTGATAAGTTGGTTGAACCCACAGTGCAAAATCACCTTCTCAAACCCCTAAATTGTTAGCATTGCAAGTAACCCAGATGTGGCAGTGGCAGACCACAATGCAATTTTCATAAATAGCACAACAGAAGTGAACAGGGTTCAATTGCAAAATTGAGAATTTTACTTTGATTCTGCCCTAATCCAAGAGCTGATCTGTCCCTGTTTATTTAACAAGATATCTTTGAACATTTAAAAAGTGAAGTAAAAGTAAATATAATTTTAAATTGTATATTAAAATGTGATTTTATTTCTGTTATTTGGTATGAGAACATCATGGGGTCACTATTATTTAACAATGTCACTTTAAATTTTTCATTGAATACACTGCATTACAAATGTT…	0.310382513661202
276_SZ108	TCTTTTCCTCAACTCAATTCTAAGC	57.559	TGGTAAAGATTGATTGAGCACCA	58.339	882	276	chr1:98552392+98553273	Schizophrenia 108		1	1	98086836	98087717	882	99.2% (1 x 2)	TCTTTTCCTCAACTCAATTCTAAGCTCTCTAAGGACAAGTATGTTGCCTTACTCATACTTGTGAACTCAGTGCTCAGGACACTGGCATGCATAGAATAAACACCCTCTGAATGTTTGCAGAATGAGTCAGTGATTAGATATGAGACTGGATGAATTCTCCTGAAGAGTAAATGCTAAGGAGAAAAGAGTGTCTTGTAGGAGGCATTTGCAGACAGACGAAGCTATAGAGAGGGACAATGCAAGTAACCTCAAATGAGAGTGTGGAAAGGCGGGAAAGCAGCCAGAGCTTCATTGTTATGAAAAAAGAGTGAAATGTGCTCTGTTGAAGAGTTGAAGAATGAACAAAGGATATTTAGTTTGAATGGAAGCTCAGTAATGAGAAATGAGAATGGTTGAGTT…	0.390022675736961
277_SZ108	ACGGAGTCTTACTCTCTTGGC	59.18	ATGGCAAACAGATGTAATGGATC	57.22	870	277	chr1:150031064+150031933	Schizophrenia 108		1	1	150059075	150059937	863	99.1% (1 x 2)	ACGGAGTCTTACTCTCTTGGCCAGGCTGGAGTGCAGTGGTGTGATCTCGGCTCACTGCAACCTCTGCCGCCCAGGTTCAAGCGATTCTTCTGCCTCAGCCTCCTGAGTAGCTGGGATTACAGGTGCCTGCCACCACACCTGGCTAATTTTTGTAGTTTTTACTAGAGACAGGGTTTCACCATCTTGGCCAGGCTGGTCTTGAACTCCTGACCTCGTGATCCACCCCCCCCCCCCCCGCCTCCCAAAATGCTGGGATTACAGACATGAGCCACCGCACCTGGCCACTTTTCATATTCTTTCTTTTTTTTTTTTGAGACAGAGTTTCACTCTTGTTGCCCAGGCTGGAGTGCAATGGCGCAATCTCGGCTCACCGCCTCCTCCTCCTCCCAGGTTCAATCG…	0.463499420625724
278_SZ108	ATTGTGTCCAACTATAGCTGGGT	59.476	GAGTTCACATCACCATTCTCCCT	60.055	915	278	chr1:177279653+177280567	Schizophrenia 108		1	1	177310517	177311431	915	99.8% (1 x 2)	ATTGTGTCCAACTATAGCTGGGTGACTCTGGTATTAGTGCAAAAGACAAACATAATAGAAGGCAAAGAGGCCAACTTCTTCCCTTCGCCTGAGTCAGGATGACAGCCTCATCCTCACCATGCAGCTGTGCACAATTAAGGATCACATCAAAAAAGGGGGCACAGGGTTAGTGCAGGTTTCCCCACACAGGCAGGAAATGCATCACACTTGTTTCGCAGGAGTTACACAGAGAATCACATTAATGGGAAAGATCATTTCATTGTATTCCCCCATTTCTAGCCTTCCTTCCCTAATATCTACTTGTTGTTATGACTATTATCATTATTTTACATACCTTTTTCACATGAATGGTTGGCTATAAAGCAGTACTTGTTTTGCTTTATTGCCATTTGCCTTATG…	0.419672131147541
279_SZ108	TCCTCTGATACCATAACCAAGAGA	58.223	GCTCATAGGGAGGGGGTACT	59.809	923	279	chr1:207976626+207977548	Schizophrenia 108		1	1	207803281	207804203	923	99.7% (1 x 2)	TCCTCTGATACCATAACCAAGAGAAAAGAGACAGAGTAGACACTGTATATTTTAGCTTCCTTTCAGGCCTCTAGATACAGCCTTATAATTTTTATGGTTCCTGGCACTAACAGTATGTGTTGCTAGAAGGAGAAGAAATAGAATTTGAACATCAAAAGTTGCGGTGTTTAATTCTCACAACAGTCGTATGGGGCAGGTATTATTCCAATTTTTGCGAAGAAATTCATCCTTAATGAGGCTAAATAACTTGTCTGCAGTCACACAACCAATCAATGCAGATCCCAGGTCTAACTCCAAAGACTGTGTTTCTGCCCTTGTATCCACTGCAGCCTGCTCCATAACTTGACTATCATCTCATTTTGTTCTTGAACTTCATTAAGAACAAAACAGGGTGGGTGG…	0.461538461538462
280_SZ108	ACTCCCACGCAGATAACACC	59.751	ATTGCTGCCAAATATCTCCACC	59.039	916	280	chr1:243544365+243545280	Schizophrenia 108		1	1	243381063	243381978	916	99.6% (1 x 2)	ACTCCCACGCAGATAACACCTTACCACACAGTCTCAACTTAAACACTTCAAATGGCATATTCTAAACAAAGTTTAAAATTGAATATGAAAACCGTGTTTAAAGTAATGATGAAATAAGGATCCAAATCTTTAGAGGCAAAGAAAATTTAAAAACTGTAGTAGAGATCTGTACATCAACCTAAAAGAAAAATAGCCTACCACTTTTTTGGTGTTTCTCCTTATGGGATTTTAAAACGGTAAATAGAGGCCAGGCGCAGTGCTCACACCTGTCATTCCAACACTGTGGGAGGCCAAGACAGGGGAATCACTTGAGGCTAAGAGTTCGTGATCATCCTGAGCAACACAATGAGACCCCATCTCTACAAAAAAACAAAAAATATTAGTCAGGCATGGTGGTGC…	0.400655021834061
281_SZ108	CCAGGGCCCACTTCAAGTAA	59.596	GTCATGCCCTTAATTGCTCTAAAGT	59.642	940	281	chr1:243554636+243555575	Schizophrenia 108		1	1	243391334	243392273	940	99.8% (1 x 2)	CCAGGGCCCACTTCAAGTAAACACATTTTTATTATGCTGCAACTCTGTTAGAGCCACCAAGCAAAGGATGCAGTCAGTCTCGGGAGATGAGAGTAGGCACCAAACAGGTCAGAAAATGTTTGGAAGCAGCTTGCCATCTAGCTGAGCTAAGAGTGTGCTCCACCTTGGCTCTGTGTGGCCTCTCCCCAGCAGGCAGGGTCACCTGTGATAGGGCTGAGCATCTCCTGCCTTGACCAAGCCATGGAGGGTAGAGAGAGAGAGCCACAGGCTGCTTGGTTTTCAGAATATCAAAGGGATTCCTTCCCCAGGGTGGGCACCAGTGAATAAGCAGGGCATCCCTTTGACACCTTTCCTGTATCTAACTTCAAGAAGCCTATTCCTGACCAGGAGATTTACCAA…	0.454255319148936
282_SZ108	AGAATCAGAAGAGGCCTGAAAGA	59.157	TGATCACCCAACAACTAACCCT	59.286	924	282	chr1:243608512+243609435	Schizophrenia 108		1	1	243445210	243446133	924	99.7% (1 x 2)	AGAATCAGAAGAGGCCTGAAAGATTATCTAGTCCAACTTCACCTCTTGTCGTCTACTCCCACCCTCCATTCCCATCCCCATCCCCAGCACCACATTTTATAGATAAGAAAACGGAAGCCCAAAGAATACAAGTAATGACTCGAATCCGTTTTCTGACATCAGGTCTAGTGTTTTCTACTGTACCCACTCAATAACTTATATGCTTCCAGAAATAGGGAGGTGGACTAGTACTAATGATGAAAAGGAAAATATACAATGGACATAAATAATCAGATGTTTACCAGAAGCTATTTTGTCCAGTGACCTTGAGACCAGAAGTTGGATGGTTAATTGGAAGGTCAAAAAATACATGACAGGTGATGGATATGTGGGGCTGAGGCATATTTTTTGTGTGTAAGG…	0.41017316017316
283_SZ108	GAACAAAACACACCAAAAAGGCA	59.251	CCACTGGGGTTGACAGATCC	60.035	917	283	chr1:243663431+243664347	Schizophrenia 108		1	1	243500129	243501045	917	99.7% (1 x 2)	GAACAAAACACACCAAAAAGGCACATATTTTAACTAGGCCAAAGTATATTAAGGACCAAACTTTTTTTCCTGCCATTCATTTTTCTTTTCATGATCTATATATCAATCATCCTTCACCTTTAATCAATGTCCCATCAGACTCCATTTTATTTATTTATCGTCCTACTTTGTGCACAATCAATCAATCAGGAGACACCAGGAAGCACTATGCATTACTCTTTCCATTCTGTTAAACAACGAAAACAGACAAAAAAGCATCTTTGGCTCGGTGGTGTCAGATTTTTTTCTTCAATACGCAGTATTTGAGAGGAGCCTAAAAACGTACTTAGTGAAATTAGAAAATTTACTTAGAGTATATCAAATATCTGTACACAGATAATTATTTGTCTAAAATAGTAT…	0.368593238822246
284_SZ108	TAACAATACACACACAACACAGC	57.837	AAAATATATAACCACACTGTCTGGC	57.432	890	284	chr2:37592199+37593088	Schizophrenia 108		2	2	37365056	37365945	890	99.5% (1 x 2)	TAACAATACACACACAACACAGCACACACACACACACACACAAGACAACACACACATACCCACACATATATGATTTAAAGCCTCAAGAAGAGATATCAAGACAGTGAGTGAGTGTGGACAGAGAAGAGAAGAGAACCATGGAGCAAGCCCCTGAGGCTCTCTAGTGTGAAGAGGGAAGGGAGATGAAGGGAGCCATTAGTGCTAAGGTAGGAGGAATATGGTATCTTAGGAACCAAATGAAGCAAGTGTAGCCAGGAGGGAGTAATTAACTGTGTTGAATGCTGACAATAAGTCAAGAGAGATGAAGACTGAGAGTTGACCACTGGATGTAGCCATGTAGAGTCATTGGTGTCTTGACAAGAGCAGTTTCAGTACACGGTGGAGATAAAACCCAACTGG…	0.430337078651685
285_SZ108	AGGGGAGAGATGGCCACTAG	60.105	ACTGATGAGAAACTAAAGGCCAAG	58.994	898	285	chr2:57987127+57988024	Schizophrenia 108		2	2	57759992	57760889	898	99.7% (1 x 2)	AGGGGAGAGATGGCCACTAGATGGCAGTGTTACCCCGCCGTCGGCACCCGGCCCGGGCTGGGAACTGGACAGGACCATTTGGCGGAAACGTGGCATGGTGAATAACGCTGAGAGCTGTGCCTCGAGAGTTCAGACCCGACCCTCCGCCCTCCTCGGGCCTTTTGTCCACAATTTTTCCATCCTCCAGCCCATACAAGGCGAGGAGACAAAAGGGGCAGTCCCCGAATGGCCTCCCTCTGAGAGCCCAGGGCTCTGATTCTTCTATGCAGCCTTCTTTCACAAAGTACAGGGGTCCCTTCGTCCGATTAGACTGAGTTCTTCCTGAATTTTTTTCTTTTTCTTCTTTTTCTTTTTATTTTTTTACCCTGGGAGGCTTGCAATCTCTGCATCCCTCACAGG…	0.44988864142539
286_SZ108	CAGGACACCAGGGCCATG	60.045	AAGGACTACTTGGACGCCCT	60.545	934	286	chr2:72361037+72361970	Schizophrenia 108		2	2	72133908	72134841	934	99.8% (1 x 2)	CAGGACACCAGGGCCATGGGTTCCCCACAGAAAGGCCCCAGCAGGCTATCTCATAGCACACCCTGCATTTTACAAATGTGGACTCTGGGCCCAGAGAGGGCAATGAAGGGACCTGGGTCCATTACTGGCCATGGCAACATCCATAAATCACAAAGCTTCTTGTAGTGGAAAAGCCACTCCAGCTCTTCCTAGCTCCCCAGGAAAGAAGTTGGAGCTAGAATATGGGGAGGCAAAGATAGTGGGCAGGGGAGGCTGCAGTGAGTGTCCATGGGCACCCAGCAGTGGAGCAGGCCTGCAGAGCCCAGGTGGGGATGGGCGAGTGAGCCCTCCTCGGGTGAAACATCCGCCTAAAGCAGGGCAAGCAGGTCCTGCGTGGAGCACAGCCGGGATCCCCAGGGG…	0.597430406852248
287_SZ108	TCTCAATTTTGTTGTTGGCATATCT	57.769	GCCTCTGTTTCAGGGTTGAA	58.019	934	287	chr2:145141072+145142005	Schizophrenia 108		2	2	144383505	144384438	934	99% (1 x 2)	TCTCAATTTTGTTGTTGGCATATCTTATAAATTATATAGTTTTTTTTTGGTGAGGCTGTCTTCGGAACCTTTTATTTTTCCAGTATCAACATTTTAAATGTCTTCGATGTAAGATAACAAAATGTAAAATGTCTGAAAAGCACTTCTTTTCAGACTTTTTCCATGTCTTGAGTATTTTTTTTAAGAAACACAGCTATTCAAATGTACACACACAAACTTAGCAAACCTGCACACACGCACACATGCGCACACCCACATACACTTTACTTCCCTTTGACTGCTCTGAAAATGGTCAGAACAGGATCATAATGCACAAATCTTTCTCTGAATGTTTCCTTATGTTAGATCAATTCCTTCTGAGTTCTGTGCTTGCCAATGCTAAATTTCCTGCCAGGGCAG…	0.339400428265525
288_SZ108	CTTTGCCACCAATCTTTCTGTT	57.67	AGTAAGAGGATTTTGTTGGCCA	57.89	914	288	chr2:162845311+162846224	Schizophrenia 108	Via online Primer3.	2	2	161988801	161989714	914	99.2% (1 x 2)	CTTTGCCACCAATCTTTCTGTTATTAACACTGGAAACCAAACTTACCCAGTGAAACACCTTTTTTGCTCATGAGTCACAAATATCAGGACCTTGGATAGAAGAAGCTTAAAAAATAAAAAGGGTTTTTGATTGTTGGATGGTCACACTTCACACCACACTCACACATGCTTTTTAAATAATTTGAAGAGTGGGTTCAGATGAAAGACTATATAGAATAAGAATTTTTATCGAGTTTGTTGAGGCTTAAAGCCTGTAAGCACCAAAAAAAAAAGTTTTCTCTCAATTAAGGAAGTTAACTATTAATTCAAATTCTTGGGTGTAAATGTTAATATTGTCACAGAAAGAAGACTGTGCAGAAAGATGATACATTTCTATGGGCCATAATATTGGTCCATTCA…	0.413566739606127
289_SZ108	AGGCTAGCAGTAGGGAGACA	59.368	AATGGCGTGAACCCAGGA	58.834	923	289	chr2:185600968+185601890	Schizophrenia 108		2	1	26886727	26887668	942	99.8% (2 x 2)	AGAATGGCGTGAACCCAGGAGGGGGAGCTTGCAGTGAGCCGAGATCGCGCCACTGCACTCCAGCCTGGGCGACACAGCAAGACTCCGTCTCAAAAAAAAAGAAAAAAAAATACAAAATTAGCCGGACGTGGTGGCACATGCCTGTAATCCCAGCTACACGGGAGGCTGAGGCAGGAGAATCGCTTGAATCCAGGAGGCGGAGGATGCAGTGAGCCGAGATTACACCATTGCACTCCAGCTTGGGCAACAAGAGCGAAACTCTGTCTCAAAAAAAAAAAAAAAAAAAAAAGTTGCAAATAATGATAACAAGTATGTACCAAGAACTGTGCATGGTCGTCCTCACCTCACAGAGCTCATAGTCAGGTCATACCCTCAGGACCTGGCACATACACTGCAAAG…	0.466029723991507
289_SZ108	AGGCTAGCAGTAGGGAGACA	59.368	AATGGCGTGAACCCAGGA	58.834	923	289	chr2:185600968+185601890	Schizophrenia 108		2	1	28554753	28555604	852	99.8% (2 x 2)	AGAATGGCGTGAACCCAGGAGGCGGAGCTTGCAGTGAGCCGAGATCGCTCCACTCCACTCCAGCCTGGGCGACAGCTGAGACTCTGTCTCAAAAAAAAAAAAAAAGAGTTATAATAAATAACAAGTCAGGACTTGAATTCGAGTCTATCCTGAAAGCTCATGAGGGCCCTTAACTCTTATGCCATTCATTTAAAAAATTGTGGAGGATGGGTGCGGTGCCTCATGCCTGTAATCCCAGCACTTCGGGAGGCGAGAAGGGTGGATCACCTGAGGTCAGGAGTTGGAGACCAGCCTGACCAACATGGAGAAACCCTGTCTCTACCAAAAATTAGCCAGGCGTGGTGGTGCATGCCTGTAATCCCAGCTACCTGGGAGGCTGAGGCAGGAGAATCGCTTGAA…	0.462441314553991
289_SZ108	AGGCTAGCAGTAGGGAGACA	59.368	AATGGCGTGAACCCAGGA	58.834	923	289	chr2:185600968+185601890	Schizophrenia 108		2	1	89621378	89622439	1062	99.8% (2 x 2)	AGAATGGCGTGAACCCAGGAGGCGGAGCTTGCAGCGAGCCGAGATCGCCACTGCACTCCAGCCTGGGCGACAGAGCGAGACACCATCTCAAAAAAAAATTCCTTTCCCCTTAAAGCACTCAGAAGTCTTGCACCACTCCTCACCTCACCCTCCTTGGGAAACTGGAGAGGCTGAGCTGCCAGTCTGATCTGAGGAAAAGTATTGTGATGTGACTTGTAGCCTAGGCAGCATCACAATGTGCCCACCTGGGGAACCTGGAAATTGGGCAGTTTGGGGCTGGCAGTAATAGTCTTTATAATCATGAAAAATGGAAACATCTCCAGGTAGAGAATTAGTAACTTTTAAAATATTGTTGCTCTTTCCTCCCTCTTTGGATATAGACTTAAAGACACTCAACAT…	0.431261770244821
289_SZ108	AGGCTAGCAGTAGGGAGACA	59.368	AATGGCGTGAACCCAGGA	58.834	923	289	chr2:185600968+185601890	Schizophrenia 108		2	2	42530396	42531863	1468	99.8% (2 x 2)	AGAATGGCGTGAACCCAGGAGGCGGAGCTTGCAGTGAGCCGAGATGGCGCCACTGCACTCCAGCCTGGGCGACAGAGCGAGACTCCGTCTCAAAGGAAAAAAAAAAGGGCTGGGAGCGGTGGCTCATGCCTGTAATCCAACAATTTGGGAGGCCGAGGCGGGCAGATCACCTGAGGTCGGGAGTTTGAGACCAGTCTGACCAACATGGAGAAACCCCCTCTCTACTAAAAATACAAAAAATTAGCTGGGCGTAGTGGCGCATGCCTATAATCCCAGCTACTCGGGAGGCTGAGGCAGGAGAATCGCTTGAACCTGGGAGGCGGAGGTTGCGGTGAGCCGAGATCACACCGTTGCACTCCAGCCTGGGCGACAAGAGTGAAACTCTGTCTGAAAAAAAGA…	0.500681198910082
289_SZ108	AGGCTAGCAGTAGGGAGACA	59.368	AATGGCGTGAACCCAGGA	58.834	923	289	chr2:185600968+185601890	Schizophrenia 108		2	2	86084175	86085068	894	99.8% (2 x 2)	AGAATGGCGTGAACCCAGGAGGCGGAGCTTGCAGTGAGCGGAGATTGTGCCACTGCACTCCAGCCTGGGCAACAGAGCGAGACTCCGTCTCAGAAAAAAAGAAAATACTGGACATGACTGTAATCCCAGCTACTAGGGAGGCTGAGACAGGAGAATCGCTTGAACCTGAGAGGCAGAGGCTGTAGGGAGCCGAGATCGTATCGCTGCACTCCAGCCTGGATGACAAAGTGAGACCCTGTCTCAAAAAAAAAAACACAAAACAAAACAAAACAAAAACCCCAAAAAGCTTTTCTGGATACATCCACTGAAACTAAGCATTACTCAATGTTCCTTTTTTATTCACATATCAGGACAGGCACTATGCCTTGTCTGTGTTCCTAACACTTGACAGGGTGTCTA…	0.44407158836689
289_SZ108	AGGCTAGCAGTAGGGAGACA	59.368	AATGGCGTGAACCCAGGA	58.834	923	289	chr2:185600968+185601890	Schizophrenia 108		2	2	184736241	184737163	923	99.7% (1 x 2)	AGGCTAGCAGTAGGGAGACAATTTTGTCTACTGCCCTTTCTTGAAAATATTTTTGTTCGATATTATTTGCTCTCTTTGATATTTAAATGACCATTATTTTATTAAAATATGGAGGCAATAGAAAATAAGTGTTCATAGAGAAAATGTGGTACATATACACTATGGAATACTATGCAGCCATAAAAAGGAATGAGATCATGTCCTTTGCAGAGACGTGGATGAAGCTGGAAATCATCATCCTCAGAAAGCTAACACAGGAACAGGAAACCAAATACCACATGGGAGTTCAACGATGGGAACACATGGACACAGGCAGGGTAGCAACACAGCTGGGGCCTGTTGGGTGGTGGGGACGAGGGGAGGGAACCTAGATGGTGGGTCAATAGATGCAGCAAACCA…	0.364030335861322
289_SZ108	AGGCTAGCAGTAGGGAGACA	59.368	AATGGCGTGAACCCAGGA	58.834	923	289	chr2:185600968+185601890	Schizophrenia 108		2	3	142052454	142052916	463	99.8% (2 x 2)	AGAATGGCGTGAACCCAGGAGACGGAGCTTGCAGTGAGTGGAGATCGAGCGGAGATCAGCCTGGGCGACTGAGCGAGACTCTGTCTCAAAGAAAAAAAAAAAGAAAACCTTAGTATTATTGGCTTAGGCAAAAATTTCTTTTCTTTCCTCTTTTTTTTCTGAGATGGGGTTTCACTATGTTGCTGAGGCTGGTCTCTAACTCCTGGGCTCAAGGGATTCTCCCACTTCCGCCTCCCAAAGTAGCTGGAACTACTAGGCTGGGTAGTCTCCCTCCCAAGGGTAGTCCACCCCTCCCAAGGGTAGTTCCGCCTCCCAAGTAGCTGGAACTACCCTGCCTGGCTTAGATTTCCCTTTTCTTTTTTTTCTTTTTTTTTGAGATGGAGTCTTGCTCTGTCGCCC…	0.496760259179266
289_SZ108	AGGCTAGCAGTAGGGAGACA	59.368	AATGGCGTGAACCCAGGA	58.834	923	289	chr2:185600968+185601890	Schizophrenia 108		2	3	161145633	161146146	514	99.8% (2 x 2)	AGAATGGCGTGAACCCAGGAGGTGGAGCTTGCAGTGAGCCGAGGTCGCGCCACTGCACTCCAGCCTGGGTGACAGAGCGAGACTCCGTCTCAAAAAATAAATAAATAAAAATAAAAGGTTTGTGAGAATGTTACCTAATGGTCAAACTATTTAAAATTGAATAGATTTGCCTATAAGGCTTTATTAAGAATTGGGTTTGACATTAATAGTACACTAATGCAAAGGTGAAATTTGGCTTTCTCTCTTGAACAATATTTTCATGTAATGTTGAGAGATAATACAAAATTTGTGTTTGCCTTTTGAATAAACTACAGGAAAATGAAGGGAGAGAAAAGAGACAAATTGTTTGGAAAGCTAAGGCTTCCTTCTATCAATGAGTAAAGGGTTTTGCCTTTGTTT…	0.398832684824903
289_SZ108	AGGCTAGCAGTAGGGAGACA	59.368	AATGGCGTGAACCCAGGA	58.834	923	289	chr2:185600968+185601890	Schizophrenia 108		2	6	10516675	10517670	996	99.8% (2 x 2)	AGAATGGCGTGAACCCAGGAGGCGGAGCTTGCAGTGAGCCGAGATTTCGCCACTGCACTTCAGCCTGGGCGAGAGTGCGAGACTCCATCTCTGAAAAAAAAAAAAAAATTTTTTCAAGAATTCAGAACCATCTTCCAGGTGAACTGTCTGTCAACTGTGTTTGGGCCATGTCCACATGCTGGCCTCACTTGGATTGATGGGTAGAAACCCTCTGTGGGCCAGCCTTCATGAGTCTTCAGGAAGTCATCCTTCGTATAAAATTTTAAAATCCTCTACTAGTTATCCGTGGGCAGAACATTTTAAAACATTCTTTTCTTATTATAAAATTCAATCTTACTGCGGAAACTCTGGGAAAAACAAAAGCATAAACAAGAAAGTAAAATCTACGCATTATACAAA…	0.421686746987952
289_SZ108	AGGCTAGCAGTAGGGAGACA	59.368	AATGGCGTGAACCCAGGA	58.834	923	289	chr2:185600968+185601890	Schizophrenia 108		2	6	34257105	34258356	1252	99.8% (2 x 2)	AGAATGGCGTGAACCCAGGAGGCAGAGCTTGCAGTGAGCCGAGATCTTGTCACTGCACTCCAGCCTGGGCGACACAGCAAGACTCTGTCTCAAAAAAAAAAAAAAAAGTAAATGGGAGCCGGGCACGGTGGCTCACGCTTGTAATCCCAGCACTTTGTGAGGCCGAGGTGGGCGGATCACGAGGTCAAGAGTTTGAGACCAGCCTGGCCAACACAGTGAAACCCTGTCTCTACTAAAAATACAAAAATTACCTGGGCGTGGTGGCACACGCCTGTAATCCCAGCTACTCGGGAGGCTGAGGCAGGAGTATCGTTTGAACCCAGGAGGCAGAGGTTGCAGTGAGCCAAGATCACACCACTGCACTCCAGCCTGGGTGACAGAACTAGACTCCGTCTCAAA…	0.493610223642172
289_SZ108	AGGCTAGCAGTAGGGAGACA	59.368	AATGGCGTGAACCCAGGA	58.834	923	289	chr2:185600968+185601890	Schizophrenia 108		2	7	146096142	146096371	230	99.8% (2 x 2)	AGAATGGCGTGAACCCAGGAGGCGGAGCTTGCAGTGAGCCGAGATCGATCGCGCCGCTGCACTCCAGCCTGGGGGACAGAGCGAGACTTTGTCTCAAAAAAAAAAAAAAAAAAGGCTTTTTTTTTTTTTTCTTTTTTTTTGAGACGGAGTCTCGCTCTCGTTGCCCAGGCTGGAGTGCAGTGGCGCGATCTCGGCTCACTGCAAGCTCCGCCTCCTGGGTTCACGCCATT	0.530434782608696
289_SZ108	AGGCTAGCAGTAGGGAGACA	59.368	AATGGCGTGAACCCAGGA	58.834	923	289	chr2:185600968+185601890	Schizophrenia 108		2	9	77940876	77941356	481	99.8% (2 x 2)	AGAATGGCGTGAACCCAGGAGGAGCTTGCAGTGAGCCGAGATCACACCACTGCACTCCAGCCTGGGCGACAGAGCGAGACTCCGTCTCAAAAAAAAAAAAATTTGCAAGTCATTTTTTTAAATCTCCCAATAAAGAAAAGGGCAATTGGAAAAAAAAGTAACAACTAAAAAATAATTTAGCTTCACAAGTATTAAAAGAATTAACAAATTCAAATGGCAATGACATAATATTTTTCAAGTATTAAATTGGCAAAGATGTTTTTAAATGCTCATATTTAGGATTTGGAAATCTAAGGCAAAATTGGAATTCTATACACCAATGTGAGAAATACAAACAGCCACAAAGCTTTCTAAAAAAACTCAACAATAGCTACCATATCTTTTTTTTTTTTGAGACAG…	0.378378378378378
289_SZ108	AGGCTAGCAGTAGGGAGACA	59.368	AATGGCGTGAACCCAGGA	58.834	923	289	chr2:185600968+185601890	Schizophrenia 108		2	9	128319235	128320022	788	99.8% (2 x 2)	AGAATGGCGTGAACCCAGGAGGAGAAGCTTGCAGTGAGCCGAGATCGTGCCACTGCACTCCAGCCTGGGCAACAGAGCATGACTCCGTCTCAAAAAAAAAAAAAAAATTAGCCAGGCATAGTGGCCTGTGCCTGTAGTCCCAGCTACTCGGGAGGCTTAGGTGAGAAGACTGCTTGAACTCAGGAGGCAGAGGTTTCAGTGAGCCGAGATCTCACCACTGCCCTCCAGCCTGGGTGACAGAGTGAGACCCTGTCTCTAAATAAATAGAATACTACAGTTGTCCCTTGGTATCCAAGGGGATTGGGTCCAGGATCCCTTGCAGATACCAAAATTTGTAGATGTTCAAGTCCCTGATATAAAATGGCATAGTATTTGCATATAACCTAGGCATGTCGTCCC…	0.512690355329949
289_SZ108	AGGCTAGCAGTAGGGAGACA	59.368	AATGGCGTGAACCCAGGA	58.834	923	289	chr2:185600968+185601890	Schizophrenia 108		2	9	138107894	138108755	862	99.8% (2 x 2)	AGAATGGCGTGAACCCAGGAGGCAGAGCTTGCAGTGAGCCGAGATTGCGCCACTGCACTCCAGTCTGGGTGACAGAGTGAGACTCTGTCTCAAAAAAAAAAGAATAGATAACCTTCAGTTTCAACACCAGAGGACAAAAAAAAAAAAAAAAGAGATAACCAGGCCAGGTGCCCTGGCTTATGCCTGTAATCCCAGCAGTTTTTGAGGTTGAGGGAGGAGGATCACTTGAGCTCAGGAGTTTGAGACCAGTCCGGGCAACACAGGGAGCCCCTGGCTCTACAAAATATTAAAAAATTAGCTGAATGTGGTGGTGAACGCCTGTGCTCCCAGCTGCTTGGGGAGGCTGAGGTAGGAGGAATGAGCTGTGATGGTGCCACTGCACTATAGCCTGGGCAACAG…	0.418793503480278
289_SZ108	AGGCTAGCAGTAGGGAGACA	59.368	AATGGCGTGAACCCAGGA	58.834	923	289	chr2:185600968+185601890	Schizophrenia 108		2	11	119005375	119006342	968	99.8% (2 x 2)	AGAATGGCGTGAACCCAGGAGGTGGAGCTTGCAGTGAGCCGAGATCATGCCACTGCACTCCAGCCTGGCGACATAGAGTGAGACCCCGTCTCAAAAAAAAAAAAAATTTTTTTTTTTTACAATTCCACATTGTCATTTTCTTTTCCTCTGGTCTCAAACTCCTGGTCTCAGGCAATCCTCCCACCTCAGCCTCCCAAAGTGCTGGGACTACAGACAAGCCACTGTGCCCAGCCAGCTGCCTAGAAATTTCTGGACTTCAACCACACTGTAATTTTTTTTTTTTAATCAGTTTCTTCTATTTCCTTGAACTCAGTTTCCAGGAACTTCTGGTTTGGAAATTAGAGACCTGCCTTCCAGGTTAGTCTACAGAAAGTCTAGTTGTGTTCCACTGTGTCTTCA…	0.452479338842975
289_SZ108	AGGCTAGCAGTAGGGAGACA	59.368	AATGGCGTGAACCCAGGA	58.834	923	289	chr2:185600968+185601890	Schizophrenia 108		2	12	49123282	49123877	596	99.8% (2 x 2)	AGAATGGCGTGAACCCAGGAGGCGGAGCTTGCAGTGAGCCGAGATTGCGCCACTGCACTGTAGCCTGGGCGAGACTCCGTCTCAAAAAAGAAAAAAAAGAATCTGGCTGGCCGGGCGGGGTGGCTCGTGCCTGTATTCCCAGCACTTTGGGAGGCCGAGGTGGGTGGATCACGAGGTCAGGAGATGGAGACCATCCTGGCTAACACGGTGAAACCCCGTCTCTACTAAAAATACAAAAAACTAGCCGGGCGTAGTGGCGGCCACCTGTAGTCCTAGCTACTCGGGAGGCTGAGGCAGGAGAATGACGTGAACCTGTGAGGGAGAGCTTGCAGTGAGCCGAGATGGTGCCACTGCACTCCAGCCTGGGTGACAGAGTGAGACTCCGTCTCAAAAAAAAAA…	0.521812080536913
289_SZ108	AGGCTAGCAGTAGGGAGACA	59.368	AATGGCGTGAACCCAGGA	58.834	923	289	chr2:185600968+185601890	Schizophrenia 108		2	12	66223568	66223820	253	99.8% (2 x 2)	AGAATGGCGTGAACCCAGGAGGCAGAGCTTGCAGTGAGCTGAGTTCACGCCACTGCACTCCAGCCTGGGCAACAGAGCGAGACTCCGTCTCAAAAAAAAAAAAAGTTATCATGGTTTTTGCCATTAAAAGTAAACATTACTTTTTTTTATTTTTATTTTTTTTTGAGACGGAGTCTTGCTCTGTCACCTAGGCTGGGGTGCAGTGATGTCATCTCAGCTCACTGCAAGCTCTTCCTCCTGGGTTCACGCCATT	0.454545454545455
289_SZ108	AGGCTAGCAGTAGGGAGACA	59.368	AATGGCGTGAACCCAGGA	58.834	923	289	chr2:185600968+185601890	Schizophrenia 108		2	12	112414814	112416246	1433	99.8% (2 x 2)	AGAATGGCGTGAACCCAGGAGGCGGTGCTTGCAGTGAGTCGAGATCACGCCACTGCACTCCAGCCTGGGAGACAGAGTGAGACTGTCTAAAAAAAAAAACAAAACAAAAAAAACCCACAAAACTTAATTGGATGCTTCCTATATGATACGGCTCTTAGATTTATAGTGTAGCATGTTAGGTTCTAAGGATAGGTGTCTTGGTGACCATCTGACCTGCACTAGAGAATCGGGTGAGGCTTGTATTCCAGAGGAAGTGGCTCCTAGCCTGAGATCAGAGGCATAGAGTTGATGTGGAGGACAGTCAGGAAGAACCCTCTGGGGAAAGAAAGCAGATTGTTAAAAGGCTCTACGCTGGGAAAGAATATGGCATATTGAGGGGAGCTGAAAGTCATTCAGCAT…	0.479413817166783
289_SZ108	AGGCTAGCAGTAGGGAGACA	59.368	AATGGCGTGAACCCAGGA	58.834	923	289	chr2:185600968+185601890	Schizophrenia 108		2	14	38542801	38543279	479	99.8% (2 x 2)	AGAATGGCGTGAACCCAGGAGGCGGAGCTTTCAATGAGCCGAGATCGCGCCACTGCACTCCAGCCTGGGGGACAGAGCGAGACTCAGTCTCAAGATAAAATAAAATAAAATAGCAAAGAAAATTTGCATGGGAGATCACAAATACAAGAATAGCAAAACATTGATACTTGCTTAAATTAGATGGTGAGTACTCAAGATTCCATATATAATACTTTCTATGTTTGTATGCAACTGAAAGTTTTACTTTTTAAACAAAAAGAATACATTGCTTCTGGGGGTAGTGAGGTCCCTGCTTTAGATATGTTCACACAAAGACTGGATCTCCACCTGAAAAGAATATTATTGCATAGTATACACAATGTTGGATCTTTATTTTTATTTATTTATTTTGAGACGGAG…	0.405010438413361
289_SZ108	AGGCTAGCAGTAGGGAGACA	59.368	AATGGCGTGAACCCAGGA	58.834	923	289	chr2:185600968+185601890	Schizophrenia 108		2	19	43853384	43853705	322	99.8% (2 x 2)	AGAATGGCGTGAACCCAGGAGGCGGAGCTTGCAGTGAGCCAAGAACGTGCCACTGCACTCCAGCCTGGTGACAGAGCGAGACTCCATCTCAAAAAAAAAAAATACCACATTGGCTAGAACAATGAGGAAGTATATTGAATGATATAACATGCTTTCAGAGGGACAGTGGGCTCCAGATATTTTTGATTCATCAGCAAAATTAAATTTCTTTTTTTTTTTTTCTTTTTCTTTTTGAGACAGAGTCTCGCTCTTTCACCCAGGCCGGACTGCAGTGGCACTATCTCGGCTCACTGCAAGCTCCACCTCCTGGGTTCACGCCATT	0.453416149068323
289_SZ108	AGGCTAGCAGTAGGGAGACA	59.368	AATGGCGTGAACCCAGGA	58.834	923	289	chr2:185600968+185601890	Schizophrenia 108		2	22	50110358	50111610	1253	99.8% (2 x 2)	AGAATGGCGTGAACCCAGGAAGCGGAGCTTGCAGTGAGCCGAGATCGCGCCACTGCACTCCAGCCTGCACAACAGAGTGACACTCCATCTCAAAAAAAAAAAAAAGACTGTCTTTTGGAAGCTTTCAGCCATCTCTATGGTTGACTGAAGGTGGAGTTAGGGGTCGCTCTTCATCCTTCATCTTACATTGGTGATTGCTGTTTTGGGTGGATTTTTCTGTTTTGTTGTTTCACATTTTGGCATTTAAAAAATGCATTGGATGTAGTTGGTTCTTAAAATTATTGGATTTCTGGCTGGCCACAGTGGCTCACGCCTGTAATCCTAGGACTTTGGGAGGCCAAGGCGGGCGGATTGCCTGAGCTCAGGAGTTCGAGAACAGCCTGGGCAACACGGTGAAAC…	0.474860335195531
289_SZ108	AGGCTAGCAGTAGGGAGACA	59.368	AATGGCGTGAACCCAGGA	58.834	923	289	chr2:185600968+185601890	Schizophrenia 108		2	23	40293258	40294590	1333	99.8% (2 x 2)	AGAATGGCGTGAACCCAGGAGGCAGAGCTTGCAGTGAGCCGAGATCATGCCACTGCACTCCAGCCTGGGTGACAGAGCGAGACTCCATCTCAAAAAAAAAAAAAAAAAAAGCATTTACCCACAAGAAACCAGAGATCACTGAGTGTTTGCGGGGAGACACATGAAAATTCGGGACTCCCTCCCCCAAAAAATGGTCAGCTGTGCCAGTGCGCTGAGTGTGCCATAGAGTTTTAGGGGAATGACTCTTAGTCCCTGGGAGCCAGGGACTGCAGGTTATAGGTTATGTGTGGCTGGTCTCAGCTGTGACCTGTTTCCAGAAAGCAAGCACAGTGGAATTGGCTCCAGGAAAAGAGAAGGGGGTCGGTGTTAAAGGATGCAGGCGGGGCCAGGCGCTGTGGC…	0.524381095273818
290_SZ108	TGGGACATTTTGAGGTAGGTGA	59.02	tggtgggactgtaaactagttca	59.03	926	290	chr2:185811713+185812638	Schizophrenia 108	High mispriming possibility. Via online Primer3.	2	2	184946986	184947911	926	99.6% (1 x 2)	TGGGACATTTTGAGGTAGGTGAAGGAATTACAAAGTGGGAGTATAAATGTTAAATCAGGCACTGAGTATGACTTTACCTGGTTAAACAAAAACAAAACCAAAAAAACCCTCATTCACAGGGAGGTAATGTTTTTGTTCCTGACCTGGCTCACTTGCCCTCAGGTATGCTGCATTTCTTTCAAAACGACTTCAAGTCTTCATCGTATTTTTTTTTTTTTGTAATATTCAGTTTATTTTTCATCCATTAAAGCATTACTACTAAATTTTTAGTTGCTTGAATACTTTCTATTAGTTTCAATGGCTTAGTTTTTTTTTTTTTTTTATTATACTCTAAGTTTTAGGGTACATGTGCACATTGTGCAGGTTAGTTACATATGTATACATGTGCCATGCTGGTGC…	0.392008639308855
290_SZ108	TGGGACATTTTGAGGTAGGTGA	59.02	tggtgggactgtaaactagttca	59.03	926	290	chr2:185811713+185812638	Schizophrenia 108	High mispriming possibility. Via online Primer3.	2	5	45939039	45940009	971	99.6% (2 x 2)	GGTGGGACTGTAAACTAGTTCAACCATTGTGGAAGTCAGTGTGGCGATTCCTCAGGGACCTAGAACTAGAAATACCATTTGACCCAGCCATCCCATTACTTGGTATATACCCAAAGGATTATAAATCATGCTGCTATAAAGACACATGCACACGTATGTTTTCATGGAATCTATGAAGAAATATATTGGAGCACATTGAGACCTATGGTGAAAAAGGAAATATGTTCAGATAAAAACTAGAAGGATACTTTCTGAGAAACAGCTTTTTGATATGTGCATTCACCTCACAGAATTAAATGATTCTTTGGATTCAGCAGGTTGGGAACACTGTTGTCCATTCTGTGAATGGACTTTGGGAGCTCTTTTAGGCCAATGGTAAAAAAGTGAATATCCCAGGAT…	0.380020597322348
290_SZ108	TGGGACATTTTGAGGTAGGTGA	59.02	tggtgggactgtaaactagttca	59.03	926	290	chr2:185811713+185812638	Schizophrenia 108	High mispriming possibility. Via online Primer3.	2	8	76365536	76366023	488	99.6% (2 x 2)	GGTGGGACTGTAAACTAGTTCAACCATTGTGGAAGTCGGTGTGGCGATTCCTCAGGGATCTAGAACTAGAAATACCATTTGACCCAGCCATCCCATTACTGGGTATATACCCAAAGGACTATAAATCATGCTGCTATAAAGACACATGCACACGTATGTTTATTGTGGCACTATTCACAATAGCAAAGACTTGGAACCAACCCAAATGTCCAACAATGGTTGACTGGAGTAAGAAAATGTGGCACATATAAACCACGGAATACTATGCAGCCATAAAAATTGATGGGTTGGTTCCAAGTCTTTGCTATTGTGAATAGTGATGCAATAAACATACGTGTGTATGTGTCTTTATAGCAGCATGATTTATAGTCCTTTGGGTATATACCCAGTAATGGGATG…	0.418032786885246
290_SZ108	TGGGACATTTTGAGGTAGGTGA	59.02	tggtgggactgtaaactagttca	59.03	926	290	chr2:185811713+185812638	Schizophrenia 108	High mispriming possibility. Via online Primer3.	2	8	88691122	88692520	1399	99.6% (2 x 2)	GGTGGGACTGTAAACTAGTTCAACCATTGTGGAAGTCAGTGTGGCGATTCCTCAGGGATCTAGAACTAGAAATACCATTTGACCCAGCCATCCCATTACTGAGTATATACCCAAAGGACTATAAATCATGCTGCTATAAAGACACATGCACACGTATGTTTATTGCGGCACTATTCACAATAGCAAAGACTTGGAACCAACCCAAATGTCCAACAATGATAGACTGGATTAAGAAAATGTGGCACATATACACCATGGAATACTATGCAGCCATAAAAAATGATGAGTTCATGTCCTTTGTAGGGACATGGATGAAATTGGAAACCATCATTCTCAGTAAACTATCGCAAGGACAAAAAACCAAACACCGCATATTCTCACTCATAGGTGGGAATTGAA…	0.395997140814868
290_SZ108	TGGGACATTTTGAGGTAGGTGA	59.02	tggtgggactgtaaactagttca	59.03	926	290	chr2:185811713+185812638	Schizophrenia 108	High mispriming possibility. Via online Primer3.	2	23	76650048	76651461	1414	99.6% (2 x 2)	GGTGGGACTGTAAACTAGTTCAACCATTGTGGAAGTCAGTGTGGCGATTCCTCAGGGATCTTGAACTAGAAATACATTTGATCCAGCCATCCCATTACTGGGTATATACCCAAAGGATGATAAATCCTGCTGCTATAAAGACACATGCACACATATGTTTATTGCGGCACTACTCACAATAGCAAAGACTTGGAACCTGGTTTAGTCTTGAGAGAGTGTGTGTGTCCAGGAATTTAGCCATTTCTTCTAGATTTTCTAGTCTATTTTTTATTTTATTTATATATATATATATATTTATTACACTTTAAGTTCTAGGGTACATGTGCACAACGTGCAGGTTTGTTACATATGTGTACATGTGCCATGTTGGTGTGCTGCACCCCTTAACTCGTCATTTAC…	0.37977369165488
290_SZ108	TGGGACATTTTGAGGTAGGTGA	59.02	tggtgggactgtaaactagttca	59.03	926	290	chr2:185811713+185812638	Schizophrenia 108	High mispriming possibility. Via online Primer3.	2	23	118020540	118021853	1314	99.6% (2 x 2)	GGTGGGACTGTAAACTAGTTCAACCATTGTGGAAGTCAGAGTGGCGATTCCTCAGGGATCTAGAACTAGAAATACCATTTGACCCAGCCATCCCATTACTGGGTATATACCCAAAGGATTATAGATCATGCTGCTATAAAGACACATGCACACGTATGTTTATTGCGGCACTACTCACAATAGCAAAGACTTGGAACTAACCCAAATGTCTAACAATGATAGACTGGATTAAGAAAATGTGGCACATATACACCATGGAATACTATGCAGCCATAAAAATGATGAGTTTATGTCCTTTGTAGGGACATGGATGAAGCTAGAAACCATCATTCTCAGCAAACTATCACAAGGACAGAAAACCAAACACCGCATATTCTCACTCATAGGTGGGAATTGAAC…	0.41324200913242
291_SZ108	GGAGCTTCTCAGTAAGAAATTCATT	57.377	CGATCAGCCCGTCCTCTA	57.841	891	291	chr2:193847873+193848763	Schizophrenia 108		2	2	192983147	192984037	891	99.3% (1 x 2)	GGAGCTTCTCAGTAAGAAATTCATTAAATCTATTTGATCCCTAGCTATAATATTCTATTTTTCTTCTCTTTGTCATTTAAATTATACCCTGTTGTTTAGTGCAATTGTACATAAAATGTGCACAGTAACTTTCAGACCATCTGTTATTGGTATCTGTTTTGTTTCTTTCTTTGAAATTATAATAACTGTCATGAATTCTGAAATGGAGTATTCTTCTGGCCTTCTGGTTAAGATCATTCCTACATCTGCTCCCAGGAAAACTGAAGTGAATACAGCATTGAATGAGCTCTGTGATCAACTATGGCTCATTTATTTCTAACTGTTATGACTAGAGGTGTGTCTGAAATCTTGGTGCTATAAAAATGCTCTAAAGATAGCCCTTCATAGAATTGCAATATT…	0.362514029180696
292_SZ108	CAGGCAAGCATTTTAATGGATCA	57.986	TGCTGGAGCTGCTTTATACCT	59.16	905	292	chr2:193984187+193985091	Schizophrenia 108		2	2	193119461	193120365	905	99.3% (1 x 2)	CAGGCAAGCATTTTAATGGATCATGTCTTGCAAAGAATAAACATCCAAAAATGTCAGTTGTTATTCTTTTTTCACATGCCTGTTACTACAACTCAGTATGGGGCTACAAAATTTCAATGTTTTATGTTTTGCCTTATCAAACTTCAAAGTAATGCCTAACATATAGTGGACATTGAGTGTACTTCCATCAAGACCAAATGTATGAGAGAAAAACAGATGCTATTATATAATTTTTCTTTTTTTTGGTCCTCTAATACAAATTCATAAAGCCTGTTATTTAACCTCATTGAGTTTTGACTTTCTGCTAAGTTAAAAAATATATTTTCATTCTGTTGTTGAGTACTATATACTGCACTTATTTTTAAAGAAATACTCATAAATGTGGAAGTAAATATACAT…	0.334806629834254
293_SZ108	AAATCAGTCCTGGAGCTGTG	57.514	ATCCTTGGCAGTATATAAAGAGTCT	57.136	915	293	chr2:198304129+198305043	Schizophrenia 108		2	2	197439405	197440319	915	98.8% (1 x 2)	AAATCAGTCCTGGAGCTGTGGCTCACGCCTGTAATCCCAGCACTTTGGGAGGCCGAGGCGGGTGGATCACCTGAGGTCGGGAGTTTGAGACCAGCCTGACCAACATGGAGAAACCCCATCTCTACTAAAGATACAAAATTAGCCGGGTATGGTGGCACATGCCTGTAATCCCAGCTACTCGGGAGGCTGAGGCAGGAGAATTGCTTAAACCTGAGAGGCAGACGTTGCAGTGAGCCAAGATGGTACCATTGCACTCCAGCCTGGGCAACAAGAGCAAAACTCCATCTCAAAAAAATAAAATAATAAAATAAAATAAAAATCAGGTCAGGCGCGGTGGCTCACACCTGTAATCCCAGCACTTTGGGAGGCCAAGGTGGGTGGATCACTTGAGGTCAGGAG…	0.47103825136612
294_SZ108	GCCCATACCTCAGTACCAAGT	59.162	TTCCCTTCCCACCCACAAAA	59.363	916	294	chr2:200163795+200164710	Schizophrenia 108		2	2	199299072	199299987	916	99.6% (1 x 2)	GCCCATACCTCAGTACCAAGTAAATAAGGTTGCTAACTTGGAGAAGTCATTCTGGCTGGAGAGAATAAATATGAGCAGGACATAAAAAGAGAAGTGTTTATCTGTGTGGTCAGGGAGAAATTAGGGTTGGAGTGGACACACTTATTATCTATCTGTTTTCCATCAAAACTATTTTTTAAAATGCCACTTGATCATTAATCAACAGATGCCATTCTTTGTAGAGCTATGTAAATCACTTTAGACTCTATAGAATAGATTCAGAAGGTCTGTTTGGTTTGATACCTTCAAATAGCCACACTTTGTTCTTTTAAGGTAATCTCATCACTGAGAGGCTTAACGTGTTTCAGAGATATTACCTGTCCATTCTAGAAACAGCTAGAAAAACAGAAGCAGAAAGAT…	0.356986899563319
295_SZ108	TATGGCAACCCCTAACAGTGC	60.34	GTTCAAGGACGCCAGGCA	60.28	900	295	chr2:200715120+200716019	Schizophrenia 108	Via online Primer3.	2	2	199850397	199851296	900	99.8% (1 x 2)	TATGGCAACCCCTAACAGTGCAAAAGAAAGGATTAGTTTCATCCTCTCATTCCACATTTTGATTCCCTGTGGACAGCTAAATCACACAAAGATGGTGTTAGAAAAATTCACCTTCACAGCGAAGCTGAAATGAGCGGCAGTACCAGGCTCAGAAAGTGACCCAAACGCAAGCCCCCCAAAACACTCTGTGTTTGGGACAGGGAGATCCTAGTCCTCCCAGCTCATCCTTCAATTACCATTGGATGACCTCTGGTGATAGATTAAACACTCGGCCGTCCCCCGCCCCCGCGCCTCCCCACCCGCGGAGAACCTAGCCTAGCAAGTGCAAAGTGCAGCAGTTCACCTGCCCCCTGCGCACGCACCCCACCGGCACTTGGAGGCCGCAAGGACGCTCGCCAG…	0.666666666666667
296_SZ108	AAGAAAACAAGAGTCTTGAGAGGG	58.628	AGTTAGAAGTCACATACTAGGCCT	58.479	915	296	chr2:225390838+225391752	Schizophrenia 108		2	2	224526121	224527035	915	99.4% (1 x 2)	AAGAAAACAAGAGTCTTGAGAGGGTAAATAACTTGAGCAAATTAATGACAAAGCAGGAACTAGTTTCTTAATTCACATTAAACATTCTTCTCACTACTCCAAACTTCCCATATACATTGTCAGAGTCCACTTTATGTATACAAGTTCATTCCCTTTACTCTATCAAGATGTGATGTATTTCCGGGCTGGGCGCTGTGGCTCATGCCTGTAATTCCAGCACTTTGGAAGGCCAAGGCAGGTGGATCACCTGAGGTCGAAAGTTCGAGACCAGTCTGGCCAACGTGGTGAATCCCGTCTTTAAGAAAAATACAAAAAATTAGCTGGACGTGGTGGTGGGCGCCTGTAATCCCAGCTACTCGGGAGGCTGAGGCAGAAGAATCGCTTGAACCCAGGAGGCGA…	0.404371584699454
297_SZ108	AGAATTGCCTGTCTCAGAATAAGGT	60.045	ATGCCTCCCTCCCCAACT	59.872	919	297	chr2:233592052+233592970	Schizophrenia 108		2	2	232727342	232728260	919	99.8% (1 x 2)	AGAATTGCCTGTCTCAGAATAAGGTATAGTGTATGATTCTTGCTTTATAATAGCAAATAGCTAATCCCCTTTCCCCACCACATATATGTGAACATGTTTGTCTGAATGTGAAGTATGGAGGGATACACACTAGGCTGTTAACATGTTTACCTCAGGAAATGGGAATAGCGGGGAGGCAAGAGTAATTATGAACTTGGAGGTTAATATGGGTCTATTTTAGTTACAGAGAATGTGGTGAGAATAGTACCTCAGGGGGAGAAAACTAGAGTCAGTGAATTTGAGTTTAGTGAAGGGTTTGGGCTAGAGATCTCTACCTCTGTGGTCTTTCTCTTTCTTCCTGTATCAGCCTGTACAGTGATTGCTGAGGCTTTGTTCCTGTTCTTTCTTGAGATTTCTGCT…	0.405875952121872
298_SZ108	CCAACTCCTTCCCAACCCTC	59.962	CCTGATGGGCTGGATGTAACT	59.508	925	298	chr2:233742643+233743567	Schizophrenia 108		2	2	232877933	232878857	925	99.8% (1 x 2)	CCAACTCCTTCCCAACCCTCCCCTCCAGGGACGAGAGATGGCCCCCTCTTTCCCTTTCCCCACTCTGCAAGCACTCCCCCACCAACGGGTGCATCACAGCCCCTCACTGGGACCAGGGGGCCTCCCTCTCCGGTGGAACCAGTGTCACATGCCTGTGCATCTCTGTGATTCTCAGAGGGTCTGAGGTCCGAGCACCCTGCTGTGGCCTGTGGGAAGACGCTACAAAGTCCCACTGGATCTAAACCAGAGGCCTGTTCTGGCGAGCAGGGAAACTGTGTCCTGGCAGAGATCGTGGTCCTGGGCACACAGGACCCCTCAGCACACTGAGGTGGAGCTGGGGCGAGGGGAGGGGGTGCGCTCTGGGTAACTGAAGGTGTGAAGGGCCCAGGGCCTGTTTCT…	0.561081081081081
299_SZ108	TCATTCTTGGTAAGACTCACTGAC	58.216	TGGGTGTCACAGCATGGTC	59.927	911	299	chr2:236794903+236795813	Schizophrenia 108		2	2	235886259	235887169	911	99.6% (1 x 2)	TCATTCTTGGTAAGACTCACTGACCAGTAAAAAGTGAGAGCTGATGGATGATACATTTCCAGTCAACATATGCTCACTGCTGAGCTCAGGCTCAGTCGAAGGGATGTTTGCTGCTTCTTGCCAAGGGGCAGATATGGTAACAACGATATGTATCAGAAGATTCCCTTAGGAGGCCTAAAGCCTGTTTGCTTTTCATCCAATCCCTTGAGTATATAATCACAACCAGTTCTTCAAAAATTCTCCTATCCACAGGCTTTTTTTTGTGATGTCCCTCAGTGTTTGCCAATTCCATCCTTTCTCCTTCATTCATAAGTATGCATGAATCTTACTGGAGTACGGAAGAGGGGCGCAATGGGGCTTTGTTGTATAATTGTATAGCAAGCAAGAGCCAATGTCATT…	0.436882546652031
300_SZ108	TGTGGCTGTGTCACCAAGAT	59.526	TTGAGCACCTACTAACTCACCA	58.764	902	300	chr3:2547323+2548224	Schizophrenia 108		3	3	2505639	2506540	902	99.5% (1 x 2)	TGTGGCTGTGTCACCAAGATTACATTAATTTCATATTCTCAGAATTAAAGGTTGATTTCCCTATATTTGACATTTGCTTGCAATGTTACTACATCATATAGATAAAAGAAGGTAGAAAGGTGTGAATTTAGGCAGAGGTTTCCCTGAAAAGAGCTTTTAAAATATCTACTTAAAGAGAAACTTGAACTCTGCTTTACGCTCTGATTTACGTGTGTTCTAAAATTAAGCCTTTCCTCTGTATCTGGGAATCAGTTGGGGAGAAAACATTAAACCATTTTCTGAAAGCATGGAGGAAGAAAAGCAGGCATCTTATTCCTCTTTTCACTCCATAAAATATATATAAGGACAGGTTTTGCCCATTTTAAACAGACACTCGCTTTTTTTTTTCTAATGTAACAC…	0.376940133037694
301_SZ108	ctcttaggggaggctcagg	58.17	GTGACTGTTAATGCCCTAAACCA	58.92	882	301	chr3:17859222+17860103	Schizophrenia 108	High mispriming possibility. Via online Primer3.	3	3	17817730	17818611	882	99.3% (1 x 2)	CTCTTAGGGGAGGCTCAGGCTGCGCAGGAGCCCACTGCAGGGCGGGGGGCATCTGGGAGACTCAGGCATGGCAGGCTGTAGGTCCCGAGCCCTGCCCGGTGGGGAGGCAGCTAAGGCCTGGTGAGAAATCGAGTGCTGGCCCACTGGTGGGCCAGCACTGCTGGGGGACCTGGCACACCCTCCACAGCTGCTGGCCCAGGTGCTAAGTCCCTCACTGCCCAGGGCCGGTGGGCTGGCGGGCCGCTCCGAGTGCAGGGCCCGCCAAGCCCATGTCCACCCGGAACTCTAGCTGGCCCGCAAGCACTGCACGCAGCCCCGGTTCCCACCCATGCCTCTCCCTCCACACCTCCCAGCAGGCTGAGGGAGCCAGCTCCGGCCTTGGCCATCCCAGGAAGGGGC…	0.689342403628118
302_SZ108	GGCTGATGTCCTTATAACAGGAAA	58.563	GCCCTTGATCACCAACTCTC	58.256	939	302	chr3:36858114+36859052	Schizophrenia 108		3	3	36816623	36817561	939	99.4% (1 x 2)	GGCTGATGTCCTTATAACAGGAAATTAGGACACAGACAGGTTCAGAGGGAGCCCCTGTGAAAACAACGGGAGGAGACAGGCACCTCCCAGCCGAGGAGAAGGCCTTACAAGAAATTAAACCTGCCAATGTTCTGGTCTTGGACATCTAGCCTCACCACCATAAGAAAATAACTTTCTGCTGTTTAAGCCATCCAGTCTGCCTAGTGCACTGTATGGCAGCCCTAGCAAACTAAAACACCTGGCCATTGTTCAGTGGGTGACAGCTTTAGGCAAGAAGGCCTCTAATCCTCTTCTCCTTCTGCCAAACAGGCAGTGCCCTCCCCACTGAGCAGAACTTCCCTTCCCCTTCCCCTTTCCCACAGGACCCCACTCCCACACACCTACTCTCATCCCAACAAG…	0.494142705005325
303_SZ108	TCTCTGAAGCAGATTTAGAGTGACA	59.522	AGCTGAGACTTGGTTGCTGG	60.251	915	303	chr3:36862526+36863440	Schizophrenia 108		3	3	36821035	36821949	915	99.8% (1 x 2)	TCTCTGAAGCAGATTTAGAGTGACAAGATCAGGGGAAGCCAGTATCCATTGTCTAGGAGAGATATTTGTGGCAGAAAGGAGAGCAATTTCCTGCTGAATTGATTTACCCATCCTTCGAATCATGATCTTACAGATGACCCGGGACACAGGTTTCTACATGGTATTGTAGACCTGGGACACAACTACATGGTATTGATCCAGGAACATGTTTAAGGCATCCCAGATGCCAGATTAGGCTGCTGGAGAAGGCCAGGGAGAACTTACTATTTCATTTACTTTATGTGTGTGTGAGAGAAAGGGAGGCAGCATGGGAGAGAGACGTTGGGCATTGAGCAGATGATGATGGTTATGGCTGGAGAATCTCTGAAAGCTGGCTTCTTGTCCTGCAAGGACAAAAAT…	0.483060109289618
304_SZ108	TCCTCTATGTGGCCTCTGCA	60.326	TGAAGGAGGCCCTCTCTCC	59.998	915	304	chr3:36864038+36864952	Schizophrenia 108		3	3	36822547	36823461	915	99.6% (1 x 2)	TCCTCTATGTGGCCTCTGCACATGGCTAGCTCTGGCTTCTGCACAGCATGTTGGTCTCAGGGTATTCAAATTCTCATGTGGCAGCTGGATTACCCCAAAAGCTTCCAAGCCTCTCAAAGGCCAGATTTGGAAAGGGCACCATATCATCTCTGCTGCATTCTGTTGGCTAAAGCAAGTCTAGTCGTAGAGGAGACAGACTCCACCTCTGGATGGGCAAAGTGACACAGAGATGGGAAGGAATTGATAGTGGCCATCCCTGAAGTCTACCTAGCCCTCACCTTTTTTTTCTTTTTGAGACAGGGTCTTGCTCTGTCACCCAGGCTGGAGTGCAGTGGTACAGTCGCAGCTCACTGCAGCCTCAACCTCCTGGGCTCAGGCAATCCTTCAACCTCAGCCTCC…	0.473224043715847
305_SZ108	TGTGACTCCACTGACCTCAATG	59.962	CCCAGGTGTCCCAAGTGTG	60.228	927	305	chr3:52837943+52838869	Schizophrenia 108		3	3	52803927	52804853	927	99.7% (1 x 2)	TGTGACTCCACTGACCTCAATGGTGGTGACCAAGCCTGAGGACAACGAGGATGAGAGGGCCATTGCCGACAAGCCTGGGGAAGGTGGGGATAGGGATGGAGGCCGGAACCCGGAGGCCTCCTGTGCTGGGCACCCTACCTGGGTGTCCAGTGGAGGAGTGGGCCAGGCTGGGGAGACCCAGACCTGCTGAAGTAGGGCATCTGAAGGAAAACTGGCCACGGGATGGGGAAAGTGGGGTGGAGCGTGAAGCAGTCAGCATGGACAGTGGGGTGTGGGGTGAATAGGAGCCTCTGCACCTCTAAAGGGAAGTGAGTAAAGGGGGCACACTGCCCATGGGGCATTTCAAGGAAAAGGACTGAGGCTGCAGCATGGAAGGGCTTAGTTAGACAAGAAGAAGCA…	0.59007551240561
306_SZ108	ATGATCACCGCTCACTGCAG	60.462	AGTACTGTGGGCACATTGGG	59.962	919	306	chr3:52844650+52845568	Schizophrenia 108		3	3	52810634	52811552	919	99.7% (1 x 2)	ATGATCACCGCTCACTGCAGCCTCGAATTCTCAGGCTCAGGTGATCCTCCCACTTCAGCCTCCAGAATAGCGGGGACTACAGGCATGGGCAATCACACCCGGCTAATTTTTTATTTTTTGCAGAGACAGGGTTTTGCCATGTTGTTCAGGCTGGTCTCGAACTCCTGGGCTCAAGCGATCTGCCCACCTCAGCCTCCCAAAGTGCTGGGATTATAGGTGTGAGCCACTGCCCCCAGCCCACATAGCTTTAAAACAGTCATCTTGAGGTCAGTTTCCACATCTATGCAGTGGGGAGAAGGATCCTGCCATGCGAAGGATGTGAAAAGGCGTCCTCGTTATGGTTTCTGGTCGTCCTCAGGTGTCTCCAGAAGGACAGCTCCAGGTAGTAGCCATGTGAAC…	0.55930359085963
307_SZ108	CATCGGATGCGGAGACACTG	60.873	CCCTGTCATTGTCCCACGG	60.377	915	307	chr3:52854785+52855699	Schizophrenia 108		3	3	52820769	52821683	915	99.8% (1 x 2)	CATCGGATGCGGAGACACTGTAGGTGGAGCACATCAGAGCTCAGGAGATCCTTGAATTCGGGAACAGATTTTCCATCCAGCCCCTTCTGGGGAGGTCCCTCTGGGAGAATCTGGAGCTTGGACATGATGCCAAGACCCCCCTCTCTCCATGCTTAGGCGCTGTACCGTGCCACCTGTGCCTGCCCCCTAGCGACAGGCTTAGGGAGGTGCTGATGCACTCACGTTTGCTCCAGCAGCTGCTGGATAGTCAGGTATGCCCAGAGCCTCTCCATGAAGTTGTGGAAGATATACTTGGGGCTCTGGAACTCCGCCTCCTGCTCTGCCACACTGGACTCCGTTTGGAAAGTGATGTTCTGTGTAGGCTGGAAAGAGGGGCCCAGCCAGGGCAGGAGCAGTGAG…	0.579234972677596
308_SZ108	TCACTTTTCTAAAGAGACCCCCT	58.76	TCATGACCCAGCATACACCC	59.454	915	308	chr3:62064323+62065237	Schizophrenia 108		3	3	62078649	62079563	915	99.7% (1 x 2)	TCACTTTTCTAAAGAGACCCCCTCTCTTTCCCTCTCAGAAATCCCCATAGTAACTAAAGTTTTTGTTGCAACTATCTCTGTGTTGGTACATTTATGAACTCTTATCCTTCTGTCCTCTCTTTTAATATGATTGTGTTGATGAATGCTCATAACTCAGTGTTGATTCTGCACCTAGAATCCCAGCATTGCATCCTGTGATAAAATAATGCTGTTCAGGCTTTTTAATAAGTCAAATCAAAGTAGTGTTGATCAGTGAGTGCCTTGACCAACTTGCCTGTAGGAGACCTTGGTGCTTTTTAGTGTGTAAGGTAGTCTGAGTAGTAGGCATCTGTGGTTTGTCTTTCAATCTTAAAGTTGACCTAGCGACTACATAAAGGTGTTCATTTCACCAATGAGTCT…	0.367213114754098
309_SZ108	GCCATTCCCCAAGTATTTCAGC	59.899	ACTTTTGGAAATTTTGTCCAATGGT	58.578	900	309	chr3:63832584+63833483	Schizophrenia 108		3	3	63846908	63847807	900	99.6% (1 x 2)	GCCATTCCCCAAGTATTTCAGCTCCATGACAACCAGCAACCTAGAATGACATTTGGGCCTGTCCTAGGGTGCTTCCCCAAATAAGCAATCCCTAAAACAGCAGTTTCCAAAAATTCACTAGTAGGAGGGCTAGAACGCCTCCTAGTTTGTTGGGAATGGATCGAAGAATTGCGTAGGCGAATAGGAAGTACCACCACTTGTGCAAATAACCAGGACATTGGAAAAAGGACTGCTAAAAAAAATTTCTAGGAAAGCCCCTAAAATCAGGCTTCCCACCCACCCTGTGATAAAAAAAGTTCCTATAAATCTGGTATGTATTGGTATAAATGCTATCAGTCATAATTTTGGTTGAAAAATAACCAAATTTCCTTGTCAATTTCATCATTATTTTAATGAACT…	0.425555555555556
310_SZ108	TCGGACCTTACCAATCCCAT	58.112	TCCCTACCTCTGCCCAAGAA	59.882	919	310	chr3:136287936+136288854	Schizophrenia 108		3	3	136569094	136570012	919	99.6% (1 x 2)	TCGGACCTTACCAATCCCATTAAGTCCAATAATTATTAAGCAAGTATAGATAATATTCAAACCATATTAAGAAAATGATAAAAATTAACTTCACTTTTACACAGATACAAACTTTCTGAGTTATCAGAAAGCATAATCCACCAGTAGTGCATAAAAAGAATGCAAATAATAAGAGGCATTTTTTCAAGAGTACAAGAATGGCTTAATATTAAGAAATCAAATAACTGAATTTATCAACAAAGTGAAAAAGAAAAATAAAACAATTATATATCAAATCAGATCTCAAAAACGTATCTGATAAAATTCTGTAGCCAATCCAAAAAAAAAAAAAAACTTTCTAGGAAAATTAGGGTTCAATAAAATCTACTTAAAGGATAAAAAGACTAAAATATATTTGTT…	0.281828073993471
311_SZ108	AATGTATGCGAAGAAGAGCCAA	58.39	TTCCACTTGGCTTTATATGGTACT	57.678	915	311	chr3:180550770+180551684	Schizophrenia 108		3	3	180832982	180833896	915	99.1% (1 x 2)	AATGTATGCGAAGAAGAGCCAATTTTCTCAAGATAAATCTGGTGCGTTTTCAACATTCTAGTAGCTTGGGACTGTGGGAGAAATACAACCGTCTAGTCTCCTTTGTGAAGGTATTACTACTCCAGTTTTAACCAGTGATCCAGATATATCTCATTCCTACCCAAAGATAAAATAGCACCATATTATTCCATTGCCAAACCAAACCTGGAATTGAAGCAGGCAGGAGATGCAAAGTAAAAATGGCCGCATGCAAATATAAGGTATTCTGTGTCTAGCCTCATTCTGCCTAAGACTTAGAATCAGAGAATTTCAGAATCAGCAGAAGTCTTACACATAATTTAGCCAATTATCCCTTTTCAAAGATGAGGAAACTGTGGCCCAGAAAAATTAAGTGGCTTG…	0.361748633879781
312_SZ108	TAGAAATGTTTCAGTGTGAGGCC	58.928	TCACTCTTTCATCCACACAATTGTC	59.761	900	312	chr3:181167153+181168052	Schizophrenia 108		3	3	181449365	181450264	900	99.9% (1 x 2)	TAGAAATGTTTCAGTGTGAGGCCAGGCGCAGGGGCTCACGCCTGTAATCCCAGCACTTTGAGAAGCCGAGGCGGGCGGATCACGAGGTCAGGAGATCAAGACCATCTTGGCTAACGCGGTGAAACCCCGTCTCTACAGAAAATACAAAAAATAAGCTGGGCGTGTTGTTGGGCACCTGTAGTCCCAGCTACTCGGGAGGCTGAGGCAGGAGAATGGCATGAACTCAGAAGGTAGAGCTTGCAGTTAGCCGAGATCGTGCCACTGCACTCCAGCCTGGGTGACAGAGCGAGACTCCACCTCAAAAAAAAAAAAAAAAAAAAGTTTCAGTGTGAGTTAAAGCAAATAAGATTTTCTAATAACCAAGGCAATTAATTAGTAAACCCCATTTTTGTGCACCCA…	0.425555555555556
313_SZ108	TTTCTGTCCCTTGTAAACTTTCCT	58.238	CCTCCCTGTTCCAAGTCACT	58.94	900	313	chr4:23423174+23424073	Schizophrenia 108		4	4	23421551	23422450	900	99.3% (1 x 2)	TTTCTGTCCCTTGTAAACTTTCCTTGTTTTCTAAAGTACTGAGATATATATTTAAACATTTTAAAAATTCCCATATTTGTAAAAGAAAAGTTCCCAGTGGATCTAGTCCACCATATTGCTAAGCAGTCTAGTTCAGCCTTTATTTATCTCATATAATAGGATTTTTAAATAATATATTTTAAATTAAACTTTCCATGGCTACAAAAATATTTTAAATCATTAAATAAGAAAATCTCCAAGAGCATTGCCTCATCTAAAATCAGCATTGTGGTTAAGACTTTGAGCTTAGGAGCCAGACTAACTGATTTTGGTTTCTAGCTCTTCTAATGATTGCCTGGGCGACCTCATGCTATTTACTGAAGGTTAGTAACTGTGCTTCATTTTCTTCATCTGTAAAAT…	0.343333333333333
314_SZ108	ccaagatcaagatgtcagcagg	59.06	accatctgatcttcgacaaacct	59.74	929	314	chr4:103146226+103147154	Schizophrenia 108	High mispriming possibility. Via online Primer3.	4	4	102225069	102225997	929	99.6% (1 x 2)	CCAAGATCAAGATGTCAGCAGGTTTAGTTTCTTCTGAGGCCTCTCTCCTTGGCTTGCAGATGGCCGCGTTCTCACTATATCCTCACATGGTTTTTCCTCAGTGTGCATCCCTGAGGTCTCTCAGTGTGTACTATTCTCTTCTTATAAGAACACCAGTCAGATTGAATTTGAGCCTGCCCTAAGGGCCTCATTTTAAACTTAATTATCTCTTTAAAGGCCCTATCTTCAAACATAGTCACATTCTGAGGTCTTGGAAGTTAAGGCTTCAGCATTTTTAGGTGACACACATTGGCCCTTAGCACTACACTTCAGCTTTCTTGTTCCTTTTCATTTCACATAATCCAACTACCTTGAAAAATGCATCTAAAGAAATAGGTATTTCAATGCTCTAGGTACCAT…	0.354144241119483
315_SZ108	AATGTCCACTTTCTTTTTAGCATTG	57.048	TTATCTTACCTCCTTGACTCCAGG	59.037	915	315	chr4:170626098+170627012	Schizophrenia 108		4	4	169704947	169705861	915	99.4% (1 x 2)	AATGTCCACTTTCTTTTTAGCATTGTGCTAGATACAGTGCATAATACAAAAAGAACATGGACCCAATCTCGACTCTAATCAAGTTGAGGAGACAAGATGAACACTGAGAATACAATAGTGAGGAATACTAACAAATATATACAAGGTTAAAAGAGTCTAAGTATGGTAGGAATATAGGGGAAGAAAGAGCTGAAGTACTTCAGGAAGAGTAGAACATGAGCTTTATTTAAAAGATTAGCAGAATTTAAGGAAAAGGTGACTTTGTTGAAGATTATAATGTGAAGACAAAGGAACGAGGATGGGAATAAATTTTGTATTCATGAGGCTTTGAAGAAATTGACTCTAGAGAGTATATTTTGGGTACTTTTGGGAAATGAAGTTGGATTAGTGAGAAGGAAC…	0.348633879781421
316_SZ108	TCTGCTTCACTCTTAATAAGCAAAA	57.26	atcgcttgaatctaggaggc	57.17	881	316	chr4:176860985+176861865	Schizophrenia 108	High mispriming possibility. Via online Primer3.	4	4	175939834	175940714	881	98.3% (1 x 2)	TCTGCTTCACTCTTAATAAGCAAAAAAAAAAACCTGACATTTGGCAATCATAAGTTTTTCCATAAGCACAAATAGAACCATAGCGCCTGGTTCCAGACTACATATAATATTTCTGAGAAAATGCATACATGCCATGAAGATCTTAACATGCCAGTTAAGGAAGAAACAGAGAAACATAAATAGTGATTAAATAGTGATGCAGTAGTTCATTTATTATTTTATAATACAAATATATTTTGTATCAGGACTGGTTTTACCAATGAAATTAAAAATGCCTGGTAGACTAGCAATAATAAAATAGGTAAGGTGACTTGGAGTCAGGGGAGTCATAAAAGCACCGTACATTGATTCTTTTTGAAAATGTGTGTATCTTCTCATGTTAGCCAACGTAAATATGAT…	0.317820658342792
317_SZ108	tggttctggctttcgtgttt	58.24	TCAGGAAGCTTATGGTCTGCA	59.09	910	317	chr5:45364212+45365121	Schizophrenia 108	Via online Primer3.	5	5	45364110	45365019	910	99.7% (1 x 2)	TGGTTCTGGCTTTCGTGTTTCTTCTTTGGCTGCTCTTTTCAGTCTCATTTGTTGGCATCTTTTAATAGTTGGTATTTCCAAAGACTATGCCCAAGGCCGCCTTTTCTTTTCACCTTACGTATTTTCCTTGGACAATCCTTCCCACTCACATGACTTCAGTTACTATCAATATACCACCAATCCTCAAGTCAATGGTCCAGCAGAGAACAAATCCCTGATCTCGACTCGTAAGCCTGTTTTCCCTTTAAACATCTACCCTTACAACATGTTTCATGGGCACATCAAACGCAAAATTGAAATTGTCTTCCTTTTTCCTGCATGTCTTCAAGTCAATGGTCCAGCAGAGAACAAATCCCTGATCTCGACTCGTAAGCCTGTCTTCCCTTTAAACATCTACCC…	0.368131868131868
318_SZ108	ACAGTATCTGAATGTAAAAGCCACC	59.352	GGAAGAAACACATGCAAGATGG	58.158	890	318	chr5:60498699+60499588	Schizophrenia 108		5	5	61202872	61203761	890	99.4% (1 x 2)	ACAGTATCTGAATGTAAAAGCCACCTGCCCCCAAAATGGGATAGAAATTAAATATCAGTCTTTCTAGTAAAATAAATAAATGGTCACTCAGTACAGCTCAGCCATCACTTGCTTAATATGTTTGATATAGTTTGGATATTTGTTTCCTCCAAGTCTCATGTTGAAATTTGATCCCCAGTGTTGGAGGTGGGACCTGGTGGGAGGTGTTTGGATCATAACGACAGATACCTCATGAATGGCTCAGTTCCATCCTTGTGATAATGAATGAGTTCCTACTGTATTAGTCTCTGTGAGAACTGATTGTCTAAAAGAGCATGGCACCTTCTCCTCTCTCTCTTTTCTCCTCTCTCACTGTTAGATGCCTGTTCCCCCTACTCTTCCTCCGTGAGTGGAAGCTTC…	0.421348314606742
319_SZ108	GCCTTTTCTTACCAACAGGTCAG	59.747	GCTCTGCAATGACATGTCAGC	60.202	920	319	chr5:60598087+60599006	Schizophrenia 108		5	5	61302260	61303179	920	99.3% (1 x 2)	GCCTTTTCTTACCAACAGGTCAGCAATGTGGGTGACAGATACTTCTTTTTGCTGTTGGAACACTTCATATTCATCTCTGGTATTGTCATGGCCTTTGACATACCTTACCAACAAGAGAGGTTTGTTGACTGATGACAGCAGGTATAACAAAATCTAACTAGTGACAGTTGTAAGAATTGGCAAAGTATTACTGCATCAACAGGTATGTGGACTGTCTAAGAGCCTCAGAAAGGACAAAGAAAGAAGCTTACAGATTCCGATGCCCCTTACTACTGTATCTGGCCTTTCTCCTGCCGGTATAGTGAGAGTTGACAGTTTGATGGATTTAATTTAGGATCTATGTTAGGATGAGATGCACTCTGTTTTCCTAAACAAATTTGCTGCAGAATGGCAGCCACA…	0.427173913043478
320_SZ108	TCAGTTTCAAAATGCTTCACTGTG	58.66	GTCCCACCAGTGATCAGCAG	60.39	911	320	chr5:88746075+88746985	Schizophrenia 108	Via online Primer3.	5	5	89450258	89451168	911	99.7% (1 x 2)	TCAGTTTCAAAATGCTTCACTGTGTAGTATCATTTCACATGTCATAGAGAGCTGTTTGACTGTCTTCAGATGTCAAAAAGCTCTGGTTATTTAATTTACCTTTGCAGATGCCTGCAATGAAATTAGTGGCAGCAGGTGTGTGTGTGGGTGGGGAGCTAGAGGGATGAGGGAGTAATAGCTAAAAGTATGTGAGGATTGCTGAGTTTTATGAATTAGTTGAAGGAGACCTTATGAACTTTTATTGTGAACACCTCTGAACTGTCCTTGTATCTCTTTTTTTCTCATTTATACCATGATATTTAGAACAGAATCTAATTCCCTAATATTCTGTAAACACCATGCTGTAAAATAACTATTCCCAGCTGCTTCACCATAGAGACTCTTATCTTTACTGTTTCC…	0.340285400658617
321_SZ108	CTGTGTGGCCTAACTCCTGG	60.036	CTGCTAGGTTTCTGAGCTCCA	59.448	923	321	chr5:101769258+101770180	Schizophrenia 108		5	5	102433554	102434476	923	99.7% (1 x 2)	CTGTGTGGCCTAACTCCTGGGGACCAGTATTGGGCACTGGCTTTGTTCTCTGGCTCCTCAAGGTAGAAACATGCTGTGCTGGAGGGGTCAAGGTGCTCCTGGACTGCTGGTCACAACACTCCAATGGACGGTGGCAGCCAAAGCACTTTGTAGGGCAGTGGCAATGGGATCCATCCTGTTTGCACATACCAGCAACAGCAGCAGCGGCAGCATGGCAGAGTGCATGCTTTTTGGCTGTGGCAGGGTGCTGGCAGGTACTGGGGTGCTAGCCTCCATGGGGGAGCTAGTGAGGTTTTTTGAAGGAAAAAAGACATTCCAGCTTTTTGAGTTGTCGTAGTTCTTGTGTTCTTTAAAGGATACAATATTTAAAATTATTATAGTTGCACAAGCTTCTCTTTT…	0.42795232936078
322_SZ108	AAATACCATGCAGTATATGTCAGGT	58.158	TGGAAGGCCAGTGAATTATAAGT	57.549	915	322	chr5:109035611+109036525	Schizophrenia 108		5	5	109699910	109700824	915	99% (1 x 2)	AAATACCATGCAGTATATGTCAGGTAGTTTGGCTTCATAAGAAGGAGGGATAATCTTGATAATTACACCTGTGCCACTTGAAGGAAATATTCTGAGCATTAGAGCAAGTGGAGTCTCTTATATTCCAGCTGGTGAGAATCATGCTATATTTCAGTTTCCTTAACTTCTGGACCATGACTTCCTGATATGTAGTTTTTGTTTTTTCTGTCTATTTCTAATTCCTTTCCCTTTTTGTTAGCGTCAGAGGAAATAGAAGTTATTGATTCCTGTCTCTTGAATCTCATTATTTAAAAAATCATTTTACAACTCATTATGCACCAACATTTTGGTCCCTTGTGCCTACTCAGGATTGAAAGTATGAAGTTTTGCCGGTTTTTTTTTTTTTTTTTGGTCGTTCAC…	0.390163934426229
323_SZ108	TCCATTTTAAGAAAATAGCCCCTTC	57.582	GTCGACAGTTTACAGTGGATGA	58.091	916	323	chr5:137850724+137851639	Schizophrenia 108		5	5	138515035	138515950	916	99.4% (1 x 2)	TCCATTTTAAGAAAATAGCCCCTTCAATAATTGACTAGAAAGCAGATGGATCAACTAAGAATCCATCTTTAACAAACCATGCTAGATAGTTGGCATTAAGACATGAATATTGTGGCCGGGCGTGGTGGCTCATGCCTGCAATGGCACTTTGAGAGGCCAAGGTGGGTGGATCACTCGAGGTCAGGAGTTTCAGACCAGCCTAGCCAACATGGTGAAATCTCATCTACTAAAAATACAAAAATTAGTTGGGCGTGGTGGTGCACACTTGTAATCCCAGCTACTCAGGAGGCTGAGGCAGGACAATCACTTGAATTCGGGAGGTGGAAGTTGCAAGGAGCCGAGATCGTGCCATTGCACTCCAGCCTGGGCAACAGAGCAAAACTCAATCTCAGAAAAAAG…	0.408296943231441
324_SZ108	TGGGCAGGTCAGGAGTTCA	60.461	AGAGGTACAATGCACGGTGG	60.036	883	324	chr5:152176686+152177568	Schizophrenia 108		5	5	152797126	152798008	883	99.8% (1 x 2)	TGGGCAGGTCAGGAGTTCAAGACCAGCCTGGCCAACATGGTGAAACCCTGTCTCTAATAAAAATACAAACATTAGCCAGGAATGGTGGCATGTGCCTGCAATCCCAGCTACTCAGGAGGCTGAGGCAGGAGAATTGCTTGAACCCATGAGGCGGTGGTTGCAGTTGAAGGGGTGGCTTGCCCCTCCACACCTGTGGGTATTTCTAGTAGGGTGGGATGAGAGACTGAGAAAAGAAATAAGACAGAGAGACAAAGTATAGAGAAACAACAGTGGGCCCAGGGGACCGGAGCTCAGCATAACAAGGACCTGCACCAGCACCGGTCTCTGAGTTCCCTCAGTTTTTATTGATTATTATTTTCATTATTTCAGCAAAAAGGAATGTAGGAGAGCAGGGTGATA…	0.473386183465459
325_SZ108	GCCTTCTGTTCATTGAGAGATTAGA	58.656	TGGAAGACACATATCATTCAGGT	57.301	927	325	chr5:152539884+152540810	Schizophrenia 108		5	5	153160324	153161250	927	99.1% (1 x 2)	GCCTTCTGTTCATTGAGAGATTAGAAAAAAAGAAACACATGTCATTTCTGGGTGAAACATTTAACAGCCAGTGCATATTTTGACCACACCATCTCTTTCCCTCTGCCTCATCAACTGACAATAATTTGGAGACTCCTCTCTGTTGGCCTGGGTGCTGGGATGAGTACATGTAAAATGTATCTTCCAGAGAACCTAGGATGGACAGGAAAATGAGCAAGAAATACACCATAATTACTTAAAGTAACTGAAGTTCAGAGTCCTTTGTGTTACCTGCTTTTTGTTACCCATTCTGATTTGTATGGACAAAGTACTTTACCTATCTGCTTCAATTTTCTGATCTATAAATGGGATAATAACTACCTACTTGGAAGGCTGTTTATGAAGATTAAGTGATAGAAC…	0.374325782092772
326_SZ108	CTGATAAATCTGCCCCATGTCC	58.848	CTGCTTGGTTCTAAATTTGCCCA	59.993	915	326	chr5:152654027+152654941	Schizophrenia 108		5	5	153274467	153275381	915	99.7% (1 x 2)	CTGATAAATCTGCCCCATGTCCACCACACACACGCACACACACACATACATACACACACACACACTTGCATCTCAATCTGTCTATAAGGTCAAATAAATCCTAAGAGAACAAGTGAATAAAGTATATGAGTGGGCTGGTCCTAATCCATTTGGTCCATTGTCATGGAGTATAAACAAAAAAATTTGTCATTCTCCTAGCAATTAATAAGCCTCTCTGAGCAGACCTGGGATGGGGCACTGTGCCCCCAAATGGCAGCAGCATTACTGGATGACTTCACCCCCTGAGGCTATGACTGCACTGAGAGCAACTTAAGTAGCATCAAGGCAATTTCAGAAGATTGCTTGCTTCTCTATTATCTTTCCTTTCTTCTTCTTCTTCTTATAAGAACAGACTCTCCT…	0.412021857923497
327_SZ108	GGGTGGGGATGGATGACATG	60.179	GGCAAGAGGATCACTTGAGC	58.622	915	327	chr5:153680289+153681203	Schizophrenia 108		5	5	154300729	154301643	915	99.5% (1 x 2)	GGGTGGGGATGGATGACATGAGCTGGGCATTACACCATAGTTGAGAAGATCAATAATAGGGTTGGGCACAGGGTGCTTTGTGACCACAGAGGATACCCCTGACCCTGTGTCTGCAGTTTAAGAGCTAGGAAGGCCTTCCGGAGGGGTGCTATCTACAGCCTCTGAAAGGAACAACTAGGGCTAGCCAGGGGATGGGGATGAGCAAGAGCATTGTGGGTAGAGAGAGTGGCCTGGCCAGAGGCCTCCAGGCAAAACAGCACATGTTCTCTGGCTTAGGACTTAGGAAGTGGAGCCAGGATGAGGACCTAGCCCCTTTGTCTCCCATTGTAGTGCTCTTTCCTGACAGTCCAGAAAAAGAAACCTCTTTTTCATCGAAGAGTCCTGGGATCCACAGATGTG…	0.421857923497268
328_SZ108	CTCTGGGGCCCAAGAAAGTA	59.008	CACAGTCCTGGATAGACTTTAGAA	57.468	927	328	chr6:30173674+30174600	Schizophrenia 108	In haplotype chromosome 6. Matches with the following haplotypes: chr6_ssto_hap7:1504081+1505007, chr6_mcf_hap5:1555510+1556436, chr6_mann_hchr6_cox_hap2:1685770+1686696ap4:1522171+1523097, chr6_dbb_hap3:1467364+1468290, chr6_apd_hap1:1413874+1414800	6	6	30205897	30206823	927	98.4% (1 x 2)	CTCTGGGGCCCAAGAAAGTAAATGGAGAGGCCTGGGTTTTCATCCTGGCCTCCAGGGTACCAGTTCAGGCCTCTCTTGAGTATCCCAAGCTGCTTCTCAAGCATATGTCTGGACCTCCAAACAAGAGCAAAGCACCTGTAATCCCAAAGCACTTAGCCTAGAGCTCCATTCCCTGTGGGTACTCCATTTAAGGGCTCCTGGGTCCCAGATTAATCCCCATATTTTAATCTGAGATAAGCAAACTCTCCATGGGGTAAACTTCCGTGAGACACCTCTAACAAACCTGGAGAGGCCAGAATTCGGGGCAAAAAGCAAGTGATCTGGATGTGCATACTAGGAGTGACTGCACCCCTACTGGCCAGGCCAAAGGCCTGGATCCCAGGCTGTCCCAGGAGATCC…	0.488673139158576
329_SZ108	acctaggttgattccatgcg	57.67	TGTTTCTAGGAAGGAGCTGTC	57.04	921	329	chr6:73155444+73156364	Schizophrenia 108	Via online Primer3.	6	6	72445742	72446662	921	98.7% (1 x 2)	ACCTAGGTTGATTCCATGCGTTTGCTATTGTGAATAGTGCTACAGTGAACATACAGGTGCATGTGTCTTTTTAGTAGAATGACTTATTTTCCTTGGATATATATCCAGTAATGAAATTGCTGGGTCAAATGGTAGTTCTATTCTTAGTTCTTTGAGAAATCTCCAAACTACTTTCCACAGTGGCAGAACTAATTTACATTCCCACCAACAGTGTATGAGTGTTCTGAGAAAAGAAACATTTTTCTTTTCAGTCTATGCGTTCTTTATATGCTATTCATTTTTTTTAGTATGTCCATATGTTATGTTGGTTTAAAGAATAAAATAAACTTGCTTTCAATAGAAGTTCTAATATGGGTCATTTATAGCAAGGCTACTCAAAGTACTAGTCCATGACAGACT…	0.362649294245385
330_SZ108	TGCAGTGAAGACTTCTGAGGC	60.271	TGGAGTGATACACAAAAATTAGGCA	58.993	915	330	chr6:96459193+96460107	Schizophrenia 108		6	6	96011317	96012231	915	99.7% (1 x 2)	TGCAGTGAAGACTTCTGAGGCCAGTATCAGTATTTTTCTTTATAAGCTACTGATTGCTTTGCCTGCATGCCTAAAAAAATTCTTTTTTAAATTTAAATTCTAGTTACTGTACTAGGACACATCTCAATGTCAATGATTCTGGGGCAATTTTTCCTGGTAATCATTGTTTCTTTTCAAAGTGAAATATCAAGTCATCTTTCATTTGAAGAATGTTTCTTTCTTTAATAATATATTGACATATTTATTTTCCCATCACTTATTTCTTTTCTCTAATTATGTATCTATTGGATTACCATTCCCTATCTTCTCCATCTTTTGTATTCTCTCTAATCCTGTCTATTTTTTCTTTACTTGCATTTCATTTTGTTAGCCTTCCTTATTTCTGTCTCTTCTTTTCCT…	0.33224043715847
331_SZ108	CCAGCTGCTCGGAGTGTG	60.434	TCGGAGAGGGGGTAGTGTG	60	885	331	chr7:2017031+2017915	Schizophrenia 108		7	7	1977396	1978280	885	99.8% (1 x 2)	CCAGCTGCTCGGAGTGTGGGGCCCGCCAAGCCCACGCCCACCCAGAACTCGCACTGGCCTGTGAGCACCACGCACGCAACCCCAGTTCCTGCCTGCGCCTCTCCCTCCACACCTCCCCGCAAGCAGAGGGAGCCGGCTCCGGCCTCGGCCAGCCCAGAGAGGGGCTCCCACAGTGCAGTGGCAGGCTGAAGGGCTCCAAACAAAATGGTGGGGACGAGAAGCTTTGACCTTGATGTAAAAGATATCAATGATAAAGGCCTTTTCTTAAATTGTAAAAATGAATAAACCCCAAGCATGCCAGCCCACACAAATCTGACACACGCCTGGCCATGCTCCCATCAACTGCAGAACGAGAGGTTCTAGGTGCCAAAAGGCCCAGCAGAAAGCAGAGTGCCATCT…	0.610169491525424
332_SZ108	TGACAGCAATCCGTGTCCTC	60.037	TGCAGAACTTTTACACAGACCAC	59.374	921	332	chr7:71750848+71751768	Schizophrenia 108		7	7	72285863	72286783	921	99.8% (1 x 2)	TGACAGCAATCCGTGTCCTCCAATTACCAGACATACAAGGGGCAATATTGATCTTGCATGCTAAAGGTTAAAGAGCCTAACCAGTCCTGACACAGCCTTTGCCAAATTCCTGTAAAAACAACCACGAAAGCACACCAAAATAATGATATTCTCAACACCACCAATGCCAGAGTATGGAAGAAGCTTTCATAAAATCAGTGCAGTTAGGATTAGAATGATGAATAATCAGTGGTGCAGCCTTGAAGTCAGAGACGGAATAACAGAGTCAGATAGTACAGGGATAAGAAGAGATTGTTATCTACCCAAATTCTCTTCTGTTTCAGGGACTTAGGGATGACCAACCATAACAGCAGGCAATCACCCTTCTGACTGGAATTGCTTTATTAAAGCAGCCAAGGT…	0.428881650380022
333_SZ108	CCAGGGCCTCAGTGCTTTG	60.975	CCATATCAATCCACTCCTGGCC	60.554	900	333	chr7:86427164+86428063	Schizophrenia 108		7	7	86797848	86798747	900	99.8% (1 x 2)	CCAGGGCCTCAGTGCTTTGTGCAGTCTCAGGACTCGGTGCCTGCATCCCAGCCGTGGCTAAAAGGGGCCAATGTAGAGCTCAGGCCATTGCTTCACAGGGTGCAAGCCCCAAGCCTTGGTGACTTACACATGATGTTGGGCCTGCATGTGCACAGAAGACAATAATTGAGGTTTGGGAACCTCAGCCTGGATTTCAGAGGATGTATGGAAACACCTGGGTGTCCAGGGAGAGGTGTGCTGCAGGGGTGGAGCCTTCATGGAGAACCTCTGCTAGGGCAGTATAGAAGGAAAAAGTGGAGTATGAGCCCCCACACAGATTCCCCATCTGGGGACTGCATAGTGGAGCTGTGAGAAGAGGGCCACCATCCTCCAGACCTGAGGATGGTAGATCTACCTACA…	0.506666666666667
334_SZ108	ACAACTGGCATTCTAAAGAGACT	57.766	CACCATGTTAGCCAAGACGG	58.913	915	334	chr7:104928609+104929523	Schizophrenia 108		7	7	105288162	105289076	915	99.1% (1 x 2)	ACAACTGGCATTCTAAAGAGACTAGCGTTAAAAACTTAAATTCAGTCTGTCCCTTCTATTTCCACCCATAGTAGGATCTTACAACATAACAAAATTGCTAAAATAAATCACTGAACTTAAAATAAATAAATAAGTAAGTAAACAAACAAACAAGGCCAGGTGGGGTGGCTCATGCCTGTAATCCCAGCACTTTGGGAGGTAGGGCGGGTGGATCACGAAATCAGGAGTTTGAGATCAGCCTGGCCAACACAGTGAACCCTATCTCTACTAAAAATATAAAAAATTAGCTGGGCGTGGTGGCGGGCACCTGTAATCTCAGCTACTTGGGAGGCTGAGCCAGGAGAATCACTTGAACCCGGGAGGCGGAGGTTGCAGTGAGCCAAGAATGCGCCATTGCAC…	0.428415300546448
335_SZ108	GAGCCCTGAGTTCTAATAGAGTC	57.55	cgcaagggacaatctctgg	58.23	891	335	chr7:110048625+110049515	Schizophrenia 108	Via online Primer3.	7	7	110408568	110409458	891	99.2% (1 x 2)	GAGCCCTGAGTTCTAATAGAGTCTCTAAAATGCAGTAGTATTCTGGAATTCTATGTGACCTGGTGGATCTGTTCTAAAACTTCAGAACTGAAAAAGACTTACAAGTCGTCTTACCTAACATCTCACCTAACACATGAATTCTTTGTACAGCAGCTCCTACACCAAGCACCCAGGTGTGACTGGAACTCCTCCAGATAATGTGTACTACCTCACAGGGCAGCTTGAAGGAAAGGAAGTCAGTTTTTGTTTTGCAGGGTGTTGGGTTGTTTATTTATTTTTTCTTCTTTTCCCAACTTTATTGACGGTTAAAAATGGTGTATGTTTAAGTTGTACAACTTGATAATTTTATATACATAAACATTGTGAAATACCCTCCATAATCAACCAAATTAACATATC…	0.375982042648709
336_SZ108	ACTAAACCCCACAACTTAACACA	58.14	accttatagcctacatgtgtggt	58.96	895	336	chr7:110898163+110899057	Schizophrenia 108	Via online Primer3.	7	7	111258107	111259001	895	99.4% (1 x 2)	ACTAAACCCCACAACTTAACACAAAGGTTAATAAAGAAACTCTTGAAACATCAACAAAATAATGATAACTAAGAGTTGTTCCATTATGCTTCCTGCTACCACAAATCTCAATGATGAAGATATTTGGAGCAATACATTAAAAGATTAGTTAACATGTCACCCCTCATGTGTGGGTGATCACAGAGTACAATGTACATACTTGAGAAGAAAAAAAGGTGAATTGATTGAAAACAAGAAGATCAAGGGTAAAATATAAAATATGTTCACAAGGTAGTAGGGCCTTAATCACTAATTACCATCCATATTGTTCATGCATATTTATATATCTTCTACACGATGGCTAATATATATTAATACCATTTAAAATACTGGTTTTATGAAGAAAAGCATTTTTTAATT…	0.36536312849162
337_SZ108	CTGTGGTGCGGGATTGGG	60.751	GGGGATGGAATTGCAGCTCT	60.106	920	337	chr7:131566794+131567713	Schizophrenia 108		7	7	131882035	131882954	920	99.8% (1 x 2)	CTGTGGTGCGGGATTGGGCAGAGAGCCCATATGCTCTTGGATGCATGTTTCACTCCTTTAGACCTCTGCCTACAAGACCCTTGCAGCAGGGGCTGGGTTCTGTTTCTCAAAGGCATAAGAGAAATAAGGTTAGGGAATTCCTTCCCAGAAACCAGATCCCCAGGCTGTTAGTCTGACTCTGATGCTGTCTGCTGTGGGGCCCACTGTGGGTCCCTATTCTACCCTACTTGTTTTCCCATTTGAAAAGCTAAAATAATCAGGGTGCTGTGTATCCCTGTGGGATAAGAAGGGAGGACTTATTAAGGACAGTGTCTTAAGGACTTAAATTTTATTTAGAGGAGAGAGAGTGAAACAATGTGGTACAAAGAGAAAGAGCCCTGGGGAGAAGCCAGGGGACAT…	0.469565217391304
338_SZ108	ACTTACCCCCAAGTCAAGTAGAT	58.564	GAGGAATGGTGAGGTGGCAT	59.743	923	338	chr7:137074382+137075304	Schizophrenia 108		7	7	137389636	137390558	923	99.6% (1 x 2)	ACTTACCCCCAAGTCAAGTAGATATTTGGACAGAAAGACAGACATTTTCTTCTGATATTTTAGGGATCACAGAGTCCCTAAGAGAGGTACCTGTAAGTACCATTCGATCCGTGGCAGGTTTAGATGTTACAATTCTAACTATCTGACAGACATTTCTGGCTAGATTCCAATGGTGGTTTGCACTAAGGACTTTCTGAAAAGGGAAAAATAAAGTAGATAAAATAATATATTAGACTACCCCATACATAGAAAATGGGGTTATTAAGTACGACCTTTGGACCTGACAAATAATAGTTGAAGCATCCTTCTGAATGATCCAGGCATCCCATAAATCTGGCAGTGGAACTCATACAACAAGCCTTTGTTCTTGGGTCAAGGATTACTTGGAGTAATGAAAAC…	0.412784398699892
339_SZ108	CAGGCTTTTGTAGTCCCAGC	58.831	AGTCAAGATAGGCAGGTCTGG	58.885	938	339	chr8:4180375+4181312	Schizophrenia 108		8	8	4322853	4323790	938	99.5% (1 x 2)	CAGGCTTTTGTAGTCCCAGCTACTCAGGAGGCTGAGGCAGGAGAATCGCTTGAACCCTGGAGGTGGAGGTTGCAGTGAGCCTAGATCGTGCCCCTGCAACCCAGCCTGGGTGACAGAGCGAGACTCCGTCTCAAAAAACTACACTAAAATATAAAATAAAATAAAATGCAGCAGGAATCTGAGAATAGAAAGATTTTGACCAGCCTACAAATAGAGAGTTAAGCAGCGAAGGAATGGAAAAATCATATGATTTTAATGAGACATTAATTGGTGGTTCCAAAGTTGTTTCCTCATTTGTACAATGACAAGCTTTGGTTATACAATTCTAATTTCCAGTTCTAAACTCCTATGCAGACCCATGTGATTGTAAGAGAAGTTAGGCATTATGTATAAGCAATT…	0.409381663113006
340_SZ108	GATCCTCGCCCCTCACTTAC	59.61	CATCGATCCCAGCCAGGTC	59.93	932	340	chr8:27441660+27442591	Schizophrenia 108		8	8	27584143	27585074	932	99.8% (1 x 2)	GATCCTCGCCCCTCACTTACCTGCTGTGTGACTCTAGGTAAATCGCTCTGCCTCTCTGAGCTGTGGTTTGCCCATATATAAAGTAAAGCTGGTAGCAACAATTGGGGTTGGGAGGATTCAGCGTCTAGTCCGCATGAAGGGTGCTCACCAGATGTGCCCTCCCTTCTCACTATGATAAACAAAGATTCTTCATTCTCCATACAAGACCCCCACCTCTGGTGTCATCTGAAACCCCACAGGAGGTGCCCTGGGCATCTGGTTTATGGCCCACAGTGAGATGGCAAGGATGGGACAGTGGGACAGGCTTGTGGGGTGGGAGGGGGCGAACGACCTCTCCAGTGAATCCAGAGGAGGGGCTGGGCACTGGCGATGCAGGCCCAGTAGAGGCAGCAGCGCATT…	0.564377682403433
341_SZ108	AGACAGAAAAACTACATCACTCGAT	58.308	TTGGAAGGCCGAAGCAGG	59.966	921	341	chr8:60700002+60700922	Schizophrenia 108		8	8	59787443	59788363	921	99.4% (1 x 2)	AGACAGAAAAACTACATCACTCGATCTAAATATTTCCATGGTAACAGAATGAGAGTTCAATGTCACTATGCAAGCACTGGGAGCACTCCAATCAGAAGTTAACAGTCTAACCACTGTTGTATTTCAAAATGGCCATGTACTGGATATGCTGATAATTCAGTGAGGAAGAGCTACATAACCATTGGTGAGAAATGCTGCTTCTACATAAAGCATTCGAAACGAATAGACTCTGATCTGCACCTTTTGAAACACAAGATAAATATTCTTCATCAGACAAATGAAGCTAAATCATCCTATTTGTCTGACCTATTCCCAAGTATGGGAGACTGGTTTAATGGTGTGTGGGGAAATGTGTTTAGATTTGTTCTTTCTGCTTATTCATTCTCATTTTAATCTATG…	0.398479913137894
342_SZ108	acccacaaacagaagcccat	59.81	tgatttggggtgaagagttctgt	59.86	911	342	chr8:89588063+89588973	Schizophrenia 108	High mispriming possibility. Via online Primer3.	8	8	88575834	88576744	911	99.8% (1 x 2)	ACCCACAAACAGAAGCCCATCAGATTAACAGCCGATCTCTTGGCAGAAACTCTATAAGCCAGAAGAGAGTGGGGGCCAATATTCAACATTCTTAAAGAAAAGAATTTTCAACCCAGAATTTCATATCCAGCCAAACTAAGCTTCATAAGTGAAGGAGAAATAAAATCCTTTACAGACAAGCAAATGCTGAGAGATTTTGTCACCACCAGGCCTGCCCTAAAACATGGAAGCACTAAACATGGAAAGGAACAACCGGTACCAGCCACTGCAAAACATGCCAAATTGTAAAGACCATCGAGGTTAAGAAGAAACTGCATCAACTAATGAGCAAAATAACCAGCTAACATCATAATGACAGGATCAAATTCACACCTAACAATATTAACCTTAAATGTAAAT…	0.392974753018661
343_SZ108	catcaacaaatgggcaaagga	57.32	GCCACAATCAATATATATGATGGCC	58.26	877	343	chr8:89591617+89592493	Schizophrenia 108	High mispriming possibility. Via online Primer3.	8	8	88579388	88580264	877	99.1% (1 x 2)	CATCAACAAATGGGCAAAGGATATGAACAGACACTTCTCAAAAGAAGACATTTATGCAGCCAAAAGACACATGAAAAAATGCTCATCATCAGTGGCCATCAGAGAAATGCAAATCAATACCACAATGAGATACCATCTCACACCAGTTAGAATGGCGATCATTAAAAAGTCAAGAAATAATTGATGCTGGAGAGGATGTGGAGAAATAGGAACACTTTTACACTGTTGGTGGGACTGGAAACTAGTTCAACCATTGTGGAATTCAGTGTGGCGATTCCTGAGGGATCTAGAACTAGAAATACCGTTTGACCCAGCCATCCCATTACTGGGTATGTACCCAAAGGATTATAAATCATGCTGCTATAAAGACACATGCACACGTATGTTTATTGTGGCACT…	0.402508551881414
344_SZ108	TCTCACACTTTGAATTTTTGGGG	57.725	TGCTTGTAGAAACCTTATGAGCT	57.834	915	344	chr8:89759846+89760760	Schizophrenia 108		8	8	88747617	88748531	915	99% (1 x 2)	TCTCACACTTTGAATTTTTGGGGGGGTTTTGGAATATTTGCATTTACAGAATAAGATATCCTGGAGATGGGACCTCTGTCTAAAAACAAAATTTATGTTTTTTATATACTTTAAACATACAGCCTGAAGGTAATTTTATACAATATTTTAAGTAATTTTTTGCATAAAACAAAAGTTATGATTGCAACATATCACATGAGGTCAAGTGTGGGATCTTCCGCTTGTGGCATCATGTTAGTCCTCAAAAAGTTTTAGATTTTGGAGCATTTCACATTTTGAATTTTTAGATTAGGGATGTTTAACTTGTATATATTCTCTACTGTTCCATTCAAATTTAAATATCCAAGGGCTTTGATTTCATCTGTCACATGGCAAAATTAGCATTAAAATTATCTCATA…	0.306010928961749
345_SZ108	TTCTTCAGAGCACTTGTGTTGT	58.39	AACGTTTCATATTTTGAAGAGCTCA	57.798	900	345	chr8:111485319+111486218	Schizophrenia 108		8	8	110473090	110473989	900	99.2% (1 x 2)	TTCTTCAGAGCACTTGTGTTGTCTGGTGCATTGTCCATGAGCAGCAATATTTTGAAAGAAACCATTTTTTTTTTCTAAGCAGTAGGTGTCAACAGTGGGCTTCAAATATTCAGTAAGCCATGCTATAAACAGAAGTGCTGTCATCTTGGCTTTGTCGTTACATTTCTAGAGCACAAGAGTAGATTTAGCATAAATCTTAAGGTCCTTAGGATTTCTGGAATAGTAAATGAGCATCAGCTTCAACTTACAGTCACCAGCTTCATTAGCCCCTAATAAGAGAGTTAAGCCTATCCTAGGAAGCCTTGAAGTCAGGCATTGACTTCTCCTCACTAGCTATGAAAGTCATAGATGGTGTCTTCTTCCAACAGAAGAATTCTAATTCCAATTGAAAAACTGTTG…	0.383333333333333
346_SZ108	CCATCAAGATGACCAGCCCC	60.467	TTTCCATGCCCTTTGCTCCC	60.904	916	346	chr8:143312472+143313387	Schizophrenia 108		8	8	142231111	142232026	916	99.8% (1 x 2)	CCATCAAGATGACCAGCCCCCAGCTCAGCTCCCTCAACTGTCTCAATGTCATTGCACCTTAAGAGGGACCCACATACTGGCCTGAAAATGACCAATTGCTGAAACAGCACCACTTCCCAGCCTTGGGAAACACATTGCTACCTGTGTTCTTGGCCAGGACACTGAAGCTCAAAAAGGTAAAGAGACCTTCCCAGGCTTCACAGTGTGTGGCAGATCTGAGGTCCAGGTCTCTCTCCCTCTAGGTGTTGTCACAAAGTCATGTTGCTGCCTGGACATCCTAGGATGTGGGCAGGGTAATAAGGGGTTGGGGGGTGGCCAGAAGGGGACAGAAGGCCAAGAGTGAATCAGACAAAGCCCTCAGCTTACTGGTTGGCGGGGGGGCAGTCAACCCTCCTGGCA…	0.565502183406114
347_SZ108	ATGAGTTTTCTCCATGTTGGCTC	59.239	CCAATGTCTACAAGATCTGAAACCA	59.06	880	347	chr9:84739532+84740411	Schizophrenia 108		9	9	82124617	82125496	880	99.7% (1 x 2)	ATGAGTTTTCTCCATGTTGGCTCGGCTGGTCTGAAACTCCCGACCTCAGGTGATCCGCCCGTCTTGGCCTCCCAAAGTGCTGGGATTATAGGCGTGAGCCACCACACCAGGCCAAGTGCTTGCATTTCTTAACTTAAATAGGAAGGTCAGCCCCCAACTTATAGTAAACATCAAAGTTCTCTGTAGTATGCTGTGTGTCACTGGTTCAGTTATAGTTGAATACGTGAATACTGAGCTATGCCAAGTGTTTGAGCCAAGTGAACATGTATGAGTGTTTCCTGGTACAGGACTGAGCAGAGTATCCCATGATGCACTAGATATTTACCTGAGCAAATTTTCAAAAGATGAGTTTAGACCTGTAACTTTTCCAATTAATTATACATTTATAAGAAGTTCATA…	0.381818181818182
348_SZ108	GGGTAATACCTGACATGCTAACATT	58.938	AGGCTCAGCTACAATCCCAC	59.456	939	348	chr10:18734058+18734996	Schizophrenia 108		10	10	18445129	18446067	939	99.7% (1 x 2)	GGGTAATACCTGACATGCTAACATTATTCTGTTATTTTTTCAGTTCATTATTAAAGTTGTTTGGGGGAATTTGAACACATCTGATTCCTCTCAGGAACGAGAGGGGAAATTGTCTAGCAGCTGGCACCCTGAGAACTGGTACAAATTACTATGTCCGATAGTTTATCTTGAACTACGGTGTTTATAACTACCAACAGAGCATCAATTTAACAAAAATTGCAGTACTTAGTATTAAAAGAGGCTTGCACTTTAAAGAAGAATGTGGAGAATTTTCTTTTCCATTACACACGTACTGGCCATATTTTGGCAACAGAGTTTCCAGTGTCATTGGCTCTGAATTGAAAAACATGAGTGAGTATCCTTTCCTATGTACAGGAGATTTCCGAGGTACGTAATGTG…	0.439829605963791
349_SZ108	TGAAGGATGCTCACTGAGGG	59.09	tgggtgaactctgaggaca	57.45	886	349	chr10:18744843+18745728	Schizophrenia 108	High mispriming possibility. Via online Primer3.	10	10	18455914	18456799	886	98.9% (1 x 2)	TGAAGGATGCTCACTGAGGGTGACATTTTGTTCCATTAAAGCTGATGTTTCTATTTATACCAAGGATAGTTTGTGCAGTTACACCGGAAATAAGATATTTCCTGCGTTTACAGACATCTACATGCTTGCCTTTTTTTCCATTTCCCACTGAACCAGTCTCGTTGTTGTCAATTATTCTTCTTCCTCTATTTAATGGAATCTTTACTTTCTTGACAGATGAATGTACATGACCACTTTCATAATGCCTCTCCCTTAAGAAACTTCCTACTGATCTTGGCCAGGCACGGTGGCTCACACCTGTGATCCCAGCACTTTGGGAGGCTGAGGCGGGCTTATCATTTCAGGCCAGGAGTTCGAGAACGGCCTGACCAAAACCCCGCCTCTACTGAAAATAGGAAA…	0.451467268623025
350_SZ108	TTTGTGGTTGCCTATCTTTACCC	58.916	AGACTTTGTATCCCCACCCAG	59.084	880	350	chr10:62346190+62347069	Schizophrenia 108		10	10	60586432	60587311	880	99.6% (1 x 2)	TTTGTGGTTGCCTATCTTTACCCCACCACTATATATTTATTTAATGTGATGGAAGATACTATACCTTGAGCCAGATGCAGTAACCAACTGAGACTTTGGATTGACTCTGGAGGAGTAGGGGAGGGCACATGATTTGCAGTGACAGAAGAGCTGGTTTCTGGCAGAGACAGCTTGACATCCAACCAAGATGTGTGCTCTGCTTCTACAATATATTGTACAATGTGTATTCTATACAATGTACAATATCTATACCATAGATATTGTAGCCAGGGGCCACATTTAGTACCATGTTGCTTTGTGGTAGGACCACATGACTAATTCTCACTAATAAAAAGTAGAAATTGCATGTATCACCTCCAAAACAAAGTAGTTAAAACGTAGGTATCTGTCCACTTTCCT…	0.415909090909091
351_SZ108	ccaggcgtgatagtgggc	60.2	gaactcccaggctgatgagg	59.82	922	351	chr10:104611779+104612700	Schizophrenia 108	Via online Primer3.	10	10	102852022	102852943	922	99.8% (1 x 2)	CCAGGCGTGATAGTGGGCACCTGTAATCCCAGCTACTCGGGAGGCTGAGGCAGGAGAATCGCTTGAACCAGGGAGGCAAAGGTTGCAGTGAGCCAAGATCGTGCCACTGCACTCCAGCCTGGGTGACAAAGCAAGACTCCATCTCAAAAAATAATGTTGTTATTGTACATAAATTATAACATAAATTCATGCACATAAACTCAATAAAGTTTATTAAGGACAAAAAGTAAACAGTAAATGAGATTCAACGGAGACATATGAATCTAGACACTTGGAAGAGGAAGTAATGTTGATATTGAATACAGGTAATTTTGAACAAAATTTTCAATACAATAACATTCTCACATCTTTTATTAACTAAAAAAGAAATGGAGCTACTTGAAATATTTTATTTTTTTT…	0.412147505422993
352_SZ108	TTGCTTTCCTAAATACAACCCAAA	57.27	TGAAAGGAGAGGGTGCTGAG	59.02	890	352	chr10:104628649+104629538	Schizophrenia 108	Via online Primer3.	10	10	102868892	102869781	890	99% (1 x 2)	TTGCTTTCCTAAATACAACCCAAAATAGACTGGGAACAGCTACATACTGTTAATGGTTCCCTCTATGTGACATTCTAGAAAAGGCAGAACTATAGGGAGGGAAAACATCTGTGGTTGCCCAGGAGCTAGGGGTGGGAAGAGGGAATTTACTACAAAGAGGCACGAAGAAACTTGTGGGCCAGAGCTATTTTGGTCTCCGTTTTGGTGATGTATATACGTTTGCCAGAGTTCACAGAACTGCACACTGAAGAAAGATGGATTTCACGGAATGTGAATTATATCTCAACAAACTTGACTTCAAAAAACAGATCGAGAAAAGATGATTCTATTCCCAAAAAGGGGGAGGGGGGAAGATCATTATATAGGTGAGTGTTCATTTAAATCAGAGTACGAGATTTA…	0.569662921348315
353_SZ108	GATTAGCCAGGCGTAGTGCT	59.895	GCTTGGCATGGCAGCATATAT	59.177	910	353	chr10:104775459+104776368	Schizophrenia 108		10	10	103015702	103016611	910	99.8% (1 x 2)	GATTAGCCAGGCGTAGTGCTGCACGTCTGTAATCCCAGCTACTCGGGAGGCTGAAGCAGGAGAATCGCTTGAACCCGGGAGGTAGAAGTTCCAGTGAGCTGAGATCATGCCACTGCACTCCAACCTGGGCAAGAGAGCAAGACTCCATCTCAAAAAAACAACAACAAAAAACAAACAAAAAACTCAGAAAGGTGCCCCTCTAGGTAGATGAATTACAAAAGCTCAAAGTTAAGCTCACCCCAGGCCTGGCTGGATTTTAATCTCTACTTGCCCCCTTACAGCTTTTAAGATTTCTCCCCTTTTAAGTACCATTAAGACTGATGAATCTTAACTGAATTGTCAGATTGTCATTTGAGCCTTTAAACTGGCTCCTTTGTAGACTTTCTGACAGAAACAAGA…	0.420879120879121
354_SZ108	AGCAATCTTAATGGCTTTAACTTGT	57.768	TAATCCAGCATTGGCCTGTG	58.234	928	354	chr10:104905744+104906671	Schizophrenia 108		10	10	103145987	103146914	928	99.1% (1 x 2)	AGCAATCTTAATGGCTTTAACTTGTAATTCAAAGCAGTATTACCTCATCTGTCACTGGTTGCCGTTTTGAAAAGTGTAAAACTATCTGAGTCAACTAGTTCTTGAAGTCACATAACAAAATTCTTCGTAAGGTCCCTAGTATAGTTTTTTTGTGACTTAACTTCAAGAAGTTTAACCTGAATCAGGCCCCTCAAAAGCATGTATCTTCCGAGACAGTGCTGGAGAAAACACCTCTGTGTTTAATTTAACTTGTCATTGGATATCACTGTTGCTCCACACAAATCCATTTGGAATAGAATTTCTTTGGCAATGGTGAACTTTATCTGTAACTCCTCCCCTTGCCTAGGAGTCACAATTTCCTGGCCAAGTGCCCAATGACAGTTAGTGCAACAACAAATG…	0.370689655172414
355_SZ108	GGGCTTTAGGTCTCACAGCA	59.675	GGTGGCAGGCACCTGTAA	59.566	924	355	chr11:17159686+17160609	Schizophrenia 108		11	1	23881137	23882076	940	98.8% (2 x 2)	ATGGTGGCAGGCACCTGTAATCCCAGCTACTCGGGAGGCTGAGGCAGGAGAATCGCTTGAACCCAGGAGGCGGAGTTTGCAGTGAGCCAAAATCACACCATTGCACTCCAGCCTGGGTGACAGAGTGAGACTCCGTCTCAAAAAATATATGTAATAATAATAATTTTAAAAAATTACTGGTTGGGCATGGTGGCTCATGCCTATAATCCCAACACTTTGAGAGGCCGAGGCGGGCAGATCACATGAGGCCAGGAGTTTGAGACCAGCCTGTCTCTAATAAACCCCATCTCTACTAAAAATACAAAAATTAACCAGGCCTGGTGGTGCACACCTGTAATCCCAGCTACTGAGGTGGTTGAGGCAGGAGAATCGTTTGAACCTAGGAGGCGGAGGCTGCAA…	0.50531914893617
355_SZ108	GGGCTTTAGGTCTCACAGCA	59.675	GGTGGCAGGCACCTGTAA	59.566	924	355	chr11:17159686+17160609	Schizophrenia 108		11	1	113143742	113145094	1353	98.8% (2 x 2)	ATGGTGGCAGGCACCTGTAATCCCAACAACTCGGGAAGCTGAGGCAGGAGAATTGCTTGAACTTGGGAGGGGGAGGTTACAGTAAGCTGAGATGCAGCCTGGGTGACAGAGCGAGACTCCATCTCAAAATAAATAAATAAATAAATAAATAAATAAATAAATAAATAAATAAATAAAATAAATAAAATAAAATCAGATTGAGAGGTAGCAGGTATGACAACATTAGATAGTTATTTTGAGTTGCAGTTCAAGACCTGGGAAGCTCTTGAAATAGATAGTTAAGCCGCTGGCAACCAGAAGGAAGGGCAGAGAGAGTGTTTCCCAAACTGAGTACCGTGAATCACTTAGTATCCATGAGATGTTTGTAAATATTTTGCCATGAAACATAGGCAGTGGTGG…	0.438285291943829
355_SZ108	GGGCTTTAGGTCTCACAGCA	59.675	GGTGGCAGGCACCTGTAA	59.566	924	355	chr11:17159686+17160609	Schizophrenia 108		11	1	236414734	236415600	867	98.8% (2 x 2)	GTGGTGGCAGGCACCTGTAATCCCAGCTACTAAGGAGGCTGAGGCAGGAGAATCGCTTGAACCTGGGAGGCAGAGGTTGCAGTGAGCCAAGATCGCACCACTGCACTCCAGCCTGGGCAACAAACTCCATCTCAAAAAAAAGAAAAAAAAAGTGGGAACTTGCTGACTTTGGGGTCTTTGGGCCCTGCTGCATCCAAGCATCTAAGTGAGGCTGTCAGGCTGAGTCCATCTCATGGCTCTGTCTTCTTCCATGTTGGCTCCATTCTTGGGCAGGATTTCCCCCCGTGGAGGGAAAGATGATTACTAGCGCCTCTTGCTTTAGATGGCGTTCTCAAGGTGGTGGAGGAAGAGGGAGCCTTTCCACCAGCACGGATAGCACAATTTTAGAGATGATTGTGA…	0.508650519031142
355_SZ108	GGGCTTTAGGTCTCACAGCA	59.675	GGTGGCAGGCACCTGTAA	59.566	924	355	chr11:17159686+17160609	Schizophrenia 108		11	2	214672375	214673088	714	98.8% (2 x 2)	ATGGTGGCAGGCACCTGTAATCCCAGCTACTCAGGAGGCTGAGGCAGGAGAATCGCTTGAAACTGGGAGGCGGAGGTTGCAGTGAGCTGAGATCGCGCCATTGCACCCTAGCCTGGGCAACAAGAGCGAAACTCCATCTCAAAAATAATAACAATAAGTTCTGGGAAAAGCACCATATTGAATCACAAAGGGCCTATTCTCAATGGGCTTGCAACCTAGTAGGAGAATTAAGATATGTATGCACATAAAATCAGTGAGACTGCGCATGTTTTGATGATCTCCAAGGATCTCAATGAGAAGGTAATATTTACAGGGAATGATAAAGGAAGGAAGTTATAATGATTTTCTTGTTGTAGCTATAACAAATTACCACAAACTTGGTGGCTTAAAAACAACACA…	0.445378151260504
355_SZ108	GGGCTTTAGGTCTCACAGCA	59.675	GGTGGCAGGCACCTGTAA	59.566	924	355	chr11:17159686+17160609	Schizophrenia 108		11	3	196085338	196086678	1341	98.8% (2 x 2)	GTGGTGGCAGGCACCTGTAATCCCAGCTACTCAGTAGGCTGAGGCAGGAGAATCGCTTGAACCCGGGAGGCAGAGGGTGCAGTGAGCTGAGATTGTGCCACTGCACTCCAGGCTGAGAGACACAGCAAGACTCCTTCTCAAAAAATAAAATGGGAATAAAAATACCTCATTCCAAAAATACCTCTTTTAGGGTCTAGAAGACCCTAAAAGCAATGACTGGCACATCATACACTGTTGGTCAGCATGGTTGAATCAGAGTCCTCGTGGGGCGGAGTGGGGTCAGGTAGGAACGTGACGTGGAAGATGTCTGCAGACTGGGATGGATGTGGGCTCATGAAGAGGAAGGATGAAGGCATTTCAGCAGAGGAGAACCGGCCACCTGAAGGCTCTGTAGTGAGA…	0.485458612975392
355_SZ108	GGGCTTTAGGTCTCACAGCA	59.675	GGTGGCAGGCACCTGTAA	59.566	924	355	chr11:17159686+17160609	Schizophrenia 108		11	5	16875974	16876709	736	98.8% (2 x 2)	GTGGTGGCAGGCACCTGTAATGTCAGCTACTCAGGAGGCTGAGGCAGGAGACTCACTTGAACCCAGGAGGCGAAGGTTACAGTGAACCAAGATGGTACCACTGCACTCCAGGCTGGGCAACAGAGCAAGAATCCATCTCAGAAAATAAAAAAATAAATAAAAATAAAAACATAAACTATGTGTTTTAGATCCTTGCATTTGACTATCTTTTATTTCCTTAAGTCTTAAATTTTAATATGTACCTCTGAGGTAGAGGCCAATTTATAACATTAAATTAGTTTCCTTAGTAAAATGGACGTGCCAGGTTTCTCTTATAATCATCAGAATATAATCAAGCAAACCAGTTTTTGGATTTACATATTTAATTTTAGTGATAGGACTTTTCATTCATTTTACACT…	0.400815217391304
355_SZ108	GGGCTTTAGGTCTCACAGCA	59.675	GGTGGCAGGCACCTGTAA	59.566	924	355	chr11:17159686+17160609	Schizophrenia 108		11	5	69547432	69548468	1037	98.8% (2 x 2)	GTGGTGGCAGGCACCTGTAATCCCAGCTACTGTGGAGACTGAGGCACGAAAATCGCTTGAACCCGGGAGGTGGAGGTTGCAGTGAGCCGAGATTGTGCCACTGCACTCCATCCTGGGTGACAGAGCAGGCTTTGTCTCAAAAAAAAAAAAAAAAGAAAAGAAAAACTTTATAAACATAAGTAGTCCATTATTGATATTGTGTATGGGAAATAAGTGAGTTCCTATGACTTGTACCTTCAATTTTGTAAATGATTTTCAAAATTATTTCTGCAAATTACGTAGGCATAGTTTTTATTTTTTAAAAAATGAGCAGTAATATATAGTCACTCTTAATAGAACTTATTTGTATTCTCTCTCTCTTTCCCCATAAGAAACAAAAACGAAACAAGAAAATGTCAT…	0.374156219864995
355_SZ108	GGGCTTTAGGTCTCACAGCA	59.675	GGTGGCAGGCACCTGTAA	59.566	924	355	chr11:17159686+17160609	Schizophrenia 108		11	5	139234779	139235320	542	98.8% (2 x 2)	ATGGTGGCAGGCACCTGTAATCCCAGCTACTCAGGAGGCTGAGGCAGGAGAATTGCTTGAACCCAGGAGGCAGAGGTTGTAGTGAGCCAAGATCATGCCATTGCACTCCAGCCTGGGCAACAAGAGCAAAACTCCATCTCAAAAAACAAAAACAAAATACAAAATATAAAATTAGCTGGGCGTGTTGGCACATGCCTGTGATCCCAGCTACTTGGGAAGCTAAGGCAAGAGAATTGCCTGAACCTGGGAGGCGGAGGATGCAGTGAGCTCAGATCACACCATTGCACTCCAGCCTGGGCAACAAGAGCGAAACTCTGTCTCAAAATAAATAGATAAATAATTAAAACAAACAAACATAGAAAAGGTACAGTAAAAATACAGTATTATAATCATTTTTTT…	0.464944649446494
355_SZ108	GGGCTTTAGGTCTCACAGCA	59.675	GGTGGCAGGCACCTGTAA	59.566	924	355	chr11:17159686+17160609	Schizophrenia 108		11	6	158650812	158652082	1271	98.8% (2 x 2)	GTGGTGGCAGGCACCTGTAATCCCAGCTGCCCAGGAGGCTGAGGCACGAGAATCACTTGAACCTGGGAGGCGGAGGTGGCAGTGAGCCAAGATCCTGCCACTGCAATCCAGCCTGGGCAACAGAGTAAGACTCCGTCTCAAAAAAAGAAAAAAAGAAATTAGAATTGGTGTAGAAAAGATTATTTAGCCAAGATAGTTGGAGATTCTAACTTAGCTGCTTTGCCTAAATGAAGCATAAGGTTTTGGAGTTAAACAGACCCAGTTTAGAGTGTGAGTTTAGGTAAGTTACTTAATCACTCCAAGACTCACTCTCCTCATCTGTAGAATGGGTACATTTACTTCATAATGTGGCAATAAGGATTAGTAGAGATAATGTATGCAAAGTACTTAAACTATCTG…	0.428009441384736
355_SZ108	GGGCTTTAGGTCTCACAGCA	59.675	GGTGGCAGGCACCTGTAA	59.566	924	355	chr11:17159686+17160609	Schizophrenia 108		11	7	76189836	76191347	1512	98.8% (2 x 2)	ATGGTGGCAGGCACCTGTAATCCCAGCTACTCAGGAGGCTGAGGCAGGATAATCACTTGAACCCGGGAGGCGGAGGGAGGTTGCAGTGAGCTGAGATCGTGCCATTGCACTCCAGCCTGGGCAACAGAGTGAGACTCCGTCTCTCAAAAAAAAAAAAAAAAAGAAAAGAAAAAAGAAAGAAAGAAAAGAAAAAAAAGAGAGAGAGGAGCTGCACCTCAGGCCACCATTGTCCTCTGCCCTCTACCACTGCCCACATCATCACCCCATTCTCTCCTCATCCTAACCTTCCCTCTATTGGGCTGGGCAATTTTTGTTGTTGTTGTTGAGACAGAGTTTCACTCTGTCATCCAGGCTAGAGTGCACTGGCGCGATCTCGGCTCACTGCAGCCTCTGCCTCCT…	0.492724867724868
355_SZ108	GGGCTTTAGGTCTCACAGCA	59.675	GGTGGCAGGCACCTGTAA	59.566	924	355	chr11:17159686+17160609	Schizophrenia 108		11	10	97593338	97594509	1172	98.8% (2 x 2)	GTGGTGGCAGGCACCTGTAATCTCAGCTACTCGGGAGGCTGAGACAGAAGAATTGCTTGAACCTGGGAGGTGGAGGTTGCAGTGAGCCGAGACCATGCCACTGCCCTCCAGCCTGGGTAACAGAGCCAGACTCTGTCTCAAAAAAAACATAAAAAAGAAAAAAATAAATAAAGTTCATCACAAAAATGCTTAAGCATTTCATCAGGAATGTAATTTCTTTCCAGAGGGAGGTTATGAATTATGTCATGCAAAAAACTTTGGCCGCAGACCAGGGCAGAAAAAAATAAAGAACTTCTTTTTCTTTTGCACAACAAATTGTCAACACACACCTCAACACCTATGCTAGGCACCACACAGGAGGCCAGAATGCATCCAGGCAAAGTAAGGCAAGCACTGGGC…	0.488907849829352
355_SZ108	GGGCTTTAGGTCTCACAGCA	59.675	GGTGGCAGGCACCTGTAA	59.566	924	355	chr11:17159686+17160609	Schizophrenia 108		11	11	17138139	17139062	924	99.2% (1 x 2)	GGGCTTTAGGTCTCACAGCACGAACCCCTCAAAGTCTACCTGGGTACACACCACATGCAGATTTTGGTGCTTTCCCAACCTTCTTGGTACAAAGGTAAACAATTCTATTACCAGGGGTTCAGGACAGGCTAGGAAAGCCTATGAGGATATGCCAAATGCCCCGGAAGACGAAAAACAGCCAGCTTCCTTTTTTTTTTTTTTTTAATTCAGTGTGAGAGCTGAGTAGTCCTCAAAGACTACCTCTAGCTGCACCCTCATGCTATGTTCTCCTACCTGACACCTTTGGCTAAATTTATCTAGCAGGTTTCTTTGCCATAGGCAACTATGTATTCCTGTGAGAGCCATACTCTCTTCAAAGAGACTAAATTTCAGTCTAAGGTTCGGGGAGAGACTTTATCA…	0.444805194805195
355_SZ108	GGGCTTTAGGTCTCACAGCA	59.675	GGTGGCAGGCACCTGTAA	59.566	924	355	chr11:17159686+17160609	Schizophrenia 108		11	11	77054508	77055726	1219	98.8% (2 x 2)	GTGGTGGCAGGCACCTGTAATCCCAGCTACGCGAGAGGCTGAGGCAGAAGAATTGCTTGAACCCTGGAGGTGAAGGTTGCAGTGAACCGAGATCACACCATCGCACTCTAGCCTGGCGGACAAGAGTGAGACTTAGTCTCAGAAAAAAAAAAAAAAAAATAGCCAACCTTGGAGCTGCTCTTCCGCCTGTGGAGTAGCCATTCTTTTGTTTCTTTACTTTTCTAATAAACTGGCTTTCACTTCACTGTGTGGACTCACAGTGAATTCTTTCTTGCTTGAGATCTAATAGCTCTCTTTTGGGGTCTGGATTGGGAGTCCTTTGCAGTAACATCTCCACAAGGCACTACTTGTGGAGATTTGGAAGCACTACTGGTCCCTTGGATAGAGGAAGCACGCTCC…	0.479081214109926
355_SZ108	GGGCTTTAGGTCTCACAGCA	59.675	GGTGGCAGGCACCTGTAA	59.566	924	355	chr11:17159686+17160609	Schizophrenia 108		11	11	102260141	102260821	681	98.8% (2 x 2)	ATGGTGGCAGGCACCTGTAATCCCAGCTACTCTGGAGACTGAGGCAGGAGAATTGTTTGAACCCGGGAGGTGGAAGTTGCAGTGAGCCAAAATCTCATCACTGCACTCCAGCCTGGGTGACAAGAGCAAGACTCCATCTTTAAAAAAAAAAAAAAAGTATTGGTGAACACTATCTTCTAGCTCTTTAAGGGACATATTTTGGTGAGGAGTGAGCAGTTCACCCATTAAAAAACCACTCCAGCATTCCTATTTTCCTAAGCCTTTGAATTACTTCCTTTGTATTATACTAAGGAATTTCTGGCACCTCAACTTCAATTAGCATGGGTAAGCTACGGCAGACCACAAAGGAGACCAAGGTTTGTACATTGGTGAGAATGACAGCTCAGACTTAGCTAAGGC…	0.433186490455213
355_SZ108	GGGCTTTAGGTCTCACAGCA	59.675	GGTGGCAGGCACCTGTAA	59.566	924	355	chr11:17159686+17160609	Schizophrenia 108		11	12	57427981	57428901	921	98.8% (2 x 2)	ATGGTGGCAGGCACCTGTAATCCCAGCTACTCAGGGGGCTGAGGCAGGAGAATCGCTTGAACCCAGGAGGTAGAGGTTGCAGTGAGCCGAGATCATGCCACTGCACTCCAGCCTGGGTGACAGAGCGAGACTCCATCTCAAAAAAAAAAAAGAGTGAAATTTGAGTAAAGACCTGAAGGAGATGAGGGGACAGACAGGCTATGCTCTTACACAGCTTTGTAAGAGAAAAGTAACTCAGGAAGAGGAAACAAGAGCATAGACCCTGAGGCAGAAGTGTGCCTAGTGTGCTCAAGGAACAGCCAGAGGCCAGTGTGCATGTTAGGGGAAAAGGGTGCCACAGATCTAGAGCTTTAAAGCTAAGATTGGTTTGGCTGGGCGCGGTGGCTCATGCCTGTAATC…	0.50271444082519
355_SZ108	GGGCTTTAGGTCTCACAGCA	59.675	GGTGGCAGGCACCTGTAA	59.566	924	355	chr11:17159686+17160609	Schizophrenia 108		11	12	112358064	112359573	1510	98.8% (2 x 2)	ATGGTGGCAGGCACCTGTAATCCCAGCTATTCCAGAGGTTGAGGCACAAGAAATTGCTTGAACCTGGGAGGCGTAGGTTGCAATGAGCCAACATCACGCCACTGCACTTCAGCCTGGTGATAGAGCAAGATTCTGTCTCAAAAAAAATAAAAAATAATTCCTATTGTATCTATCCCACAAGTTTATTTTTAGAGGAATAAAATAATGTGGTCAGTTAAAATATGATTCATCCATAAAATAAAATATTATAACCTACTAAAAAGTATTAAGAGCTGGGTACAGTGGCACACACCTGAAATCCCAGCTATTCAGGAGCCCGAAGCAGGGGGATCACTTCAGCCCAGGAGTTCAAGACCAGCTTGAACAACATAGCAAAACCTCATTTCAAAAAGAAAAAAA…	0.413245033112583
355_SZ108	GGGCTTTAGGTCTCACAGCA	59.675	GGTGGCAGGCACCTGTAA	59.566	924	355	chr11:17159686+17160609	Schizophrenia 108		11	15	89212445	89212883	439	98.8% (2 x 2)	ATGGTGGCAGGCACCTGTAATCCCAGCTACTTTGGGAGGCTGAGGCAGGAGAATCACTTGAACTTGAGAGGCAGAGGTTGCAGTGAGCCGAGATCACGCCACTGCTCTCCAACCTAGGCGACAAGAGCAAAACTGTGTCTCAAAAAAAAAAAAAAAAAGAAAAATGTGTGTGTGTGTGCGCGTGTGTGTGTGTGTGTATGTGCGTGCATACATGTATGAAAAGATTGGAAGGATGTCAATAGTAGAGCTCTCTAGGTAGTAGAATTGCAAATGATTTTAAATTTGTCTGTAATTTTTTTTTTGAGATGGAGTCTTGCTCTGTCACCCAGGCTGGAGTGCAGTGGTGCGATCTTGGCTCACTGCAACCTCTGCCTCACAGGTTCAAGCGATTCCCCTGCC…	0.47380410022779
355_SZ108	GGGCTTTAGGTCTCACAGCA	59.675	GGTGGCAGGCACCTGTAA	59.566	924	355	chr11:17159686+17160609	Schizophrenia 108		11	16	8160429	8161597	1169	98.8% (2 x 2)	ATGGTGGCAGGCACCTGTAATCCCAGATACTTGGGAGGCTGAGGCAGGAGAATCACTTGAACCAGGGAGGTGGAGGTTGCAGTGAGCCAAGATCGCACCATTGCACTCTAGCCTGGGCAACAAGAGCAAAACTTCATCTCAAAAAATAAAAAATAAAACAAAAAAAAACATGCAGAAAAATCAGCTTAAGGGGGTGATGGTGTCCGGTAACTACCTCCCAGAAAAATAAGAAAAACCACACATGTGAAAAATATTCTGCAACACACACTGGGGCCTGTTGGAGGTTGGGAGGGGGAGGAGGGAGAGCATCAGGAAGAATAGCTAATAGATGCTGGGCTTCATACCTGGGTGATGGGAAGATCTGTGTGGCAAACCACCATCATACACATTTACCTATGT…	0.46278870829769
355_SZ108	GGGCTTTAGGTCTCACAGCA	59.675	GGTGGCAGGCACCTGTAA	59.566	924	355	chr11:17159686+17160609	Schizophrenia 108		11	17	3570231	3570868	638	98.8% (2 x 2)	GTGGTGGCAGGCACCTGTAATCCCAGCTACTCGGGAGACTGAGGCAGGAGAATCGCTTGAACCCGGGAGGCGGAGGGTGCAGTAAACCCAGATCACGCCACTGCACTCCAGCCTGGGCAACAGAGTGAGACTCCATCTCAGGAAAAAAAAAAAAAAAAGTTCTGGAAATAGATAGTGGTGAGTGTTGTACAATAATGTAAATGTACTTAATGACACTAAACTGTACACTTCAAAAGGATTTAAATGGCAAGTTTTAGGAGATAGATATTTTACCACAATTTTTTACAATTAAATACAAAGTAATTCAAAAACAAAGTGTTCAGGGTTGTAATTATAACTCAAAATTTGTCCACTATAAACTATGCCTCTTTCATTTCTAGGTAAACGTCCTCAATTAGA…	0.413793103448276
355_SZ108	GGGCTTTAGGTCTCACAGCA	59.675	GGTGGCAGGCACCTGTAA	59.566	924	355	chr11:17159686+17160609	Schizophrenia 108		11	17	7663401	7663775	375	98.8% (2 x 2)	GTGGTGGCAGGCACCTGTAATTCCAGGTATTCAAGAGGCTGAGGCAAGAGAATCGCTTGAATCCGGGAGGTGGAGGTTGCAGAGAACAGAAACCACGCCACTGTACTCCAGCCTGGGCAACAGAGCGAGACTCCGTCTCAGAAAAAAGAAAAGAAAAGAAAAGAAAAAATAAAACCAGAGTAAGTCTATATCCCCACAGTTTTTAATTTAATTAATTAATTACTTTGTTTATTTATTTTGAGATGGAGTCTTGCCCTGTCACCCAGGCTGAGTGCAATGGCACGATCTTTGCCCACTGCAACCTCCGCCTCCTGGGTTCAAGCGATTCTCCTGCCTCAGCCTCCCAAGTAGCTGGGATTACAGGTGCCTGCCACC	0.474666666666667
355_SZ108	GGGCTTTAGGTCTCACAGCA	59.675	GGTGGCAGGCACCTGTAA	59.566	924	355	chr11:17159686+17160609	Schizophrenia 108		11	17	39893682	39894522	841	98.8% (2 x 2)	CTGGTGGCAGGCACCTGTAATCCCAGCTACTCAGGAGGCTTAGGCAAGAGAATCACTTGAACCCGGGAGGTGGAGATTGCAGTGAGCTGAGATCACTCATTGCACTCAGCTTGGGCAACAAGAGCGAAACTCCGTCTCAAAAAAAAAAAAAAAAAAAAAGAGAGACATGCCTATGGAGTTCAAAAAGAAACGCTGCATGTACTCCCACGTTATAATGAACACGTGTACATATAGAACTACACGCCAGGAACTGCACAGAGTGTTTCCGATGTATTCAGTAGTTCTCATATTCATCATAGGAGGCAGATACTCTTATTATTCACATTTGATACACATCAAAACGGAGGCATAATAGGGAAGTAATTTGCCCAAAAAGTCACATAGCTGGTATGTGGCAGA…	0.425683709869203
355_SZ108	GGGCTTTAGGTCTCACAGCA	59.675	GGTGGCAGGCACCTGTAA	59.566	924	355	chr11:17159686+17160609	Schizophrenia 108		11	19	49694490	49695438	949	98.8% (2 x 2)	GTGGTGGCAGGCACCTGTAATCACAGCTACCTGGGAGGCTGAGGCAGAAGAATCACTTGAATCCAGGAGGCAGAGATTGCAGTGAGCCAAGATTGCGCCACTGCACTCCAGCCTGGGTGACAGAGCAAGACTCCGTTTCAAAAAAAAAAAAAAAAAAGGGGGTGGGAGCCGGCGGCCAGGAGGATCTCCTGAAGCTGGGATGCTTCAGCAGGCTAAACTGAACCTCTGTGGTCTTGTTGGTTGTATAATCTGTTCCAGTTGGCAAACAGCCACTGCCTTGAACTCCGAATCCCTCTCCCGCCCTTACCCTGGGACTCCTTGGGCCTCAGGCCAGTCTACCAACTAAAGTGTTAACATGTGACCATCCTTGGCCAGGCATGGTGGCTCACGCCTCTAATC…	0.489989462592202
355_SZ108	GGGCTTTAGGTCTCACAGCA	59.675	GGTGGCAGGCACCTGTAA	59.566	924	355	chr11:17159686+17160609	Schizophrenia 108		11	20	53821073	53821441	369	98.8% (2 x 2)	GTGGTGGCAGGCACCTGTAATCCCAGCTACTTGGAAGGCTGAGGCAGGAGAATTGCTCAAACCTGGGAGGCAGAGGTCGCAGTGAGCCGTGGTCATGCCATTGCACTCCAGCTTGGGTGACAAGAGCAAAACTCTGTCTAAAAAAAAAGAAACCACTTTCTCTGTGTTTTAGTCAAAGACATTATGAGCACCTTTCATTAAATATTCTTTCTTTCTTTTTTTTTTTTTTTTGAGACACAGTTTTGCTCTTTTTGCTCAGGCTGGAGTGCAATGGCACGATCTTGGCTCACTGCAACCTCTGCCTCCTGGGTTCAAGTGATTCTCCTGCCTCAGCTTCCCAAGTAGCTGGGATTACAGGTGCCTGCCACC	0.471544715447154
355_SZ108	GGGCTTTAGGTCTCACAGCA	59.675	GGTGGCAGGCACCTGTAA	59.566	924	355	chr11:17159686+17160609	Schizophrenia 108		11	23	41416499	41417963	1465	98.8% (2 x 2)	GTGGTGGCAGGCACCTGTAATCCCACCTACTTGGGAGGCTGAGGCAGAAGAATCGCTTGAACCTGGGAGGCAGAGGTTGCAATGAGCCGAGATCGCGCAACTGCATTCCAGCTTGGGCCACAGAGTGAGACTCTGTCTCAAAAAATAAATAAATTTTAAAAAATCTCACGGGGCGCGGTGGCTCACGCCTGTAATCCCAGCACTTTGGGAGCCCAAGCGGGGGCAGATCACTTGAGGTCAGGAGTTTGAGACCAGCCTGGCCAACACGGTGAAACACCGTCTCTACCAAAAATACAAACATTAGCCAGGCGTTGTGGTGGGCGCCTGTAATCCCAGCTACTCAGGAGGCTGAGGCGGGAGAATCACTTGAACCTGGGAGGTGGAGGTGCAGTGAGCCGA…	0.481911262798635
356_SZ108	TCTTCTTTGCCTTCCGCCAC	60.889	AGAGGGAGGTAGCAAAGGGT	59.881	928	356	chr11:24403150+24404077	Schizophrenia 108		11	11	24381604	24382531	928	99.8% (1 x 2)	TCTTCTTTGCCTTCCGCCACGATTGTAAATTTCCTGAGGTCTCCCCAGCCATGCAGAACTGTGACTCAATTAAACCTCTTTCCTTTATAAATTACTCAGTCCCCAGTAGTATCTTTATAGCAGTGTGAAAACGGACTAATACATATACTCATGTAAATGTGTTGAAAGGAATATACCCTATCCATGTTAAAAACAACAACAACAAAAAAGAAAACAACAACAACAAAAAAAACAGGCATCTCTGGAAGCCTAGACTGAAGGTTTAGTTCTGTAGTTCTCCATAAGGCTCAATGAAGCCCTCGACCAACTGGGGACATTTGATAATGTCTGGAGACATACTGGTCATCACAACTGAGCAGGGGTGAGGCACCACTGACGTCCAAAGGGTAGAGGCTAGGG…	0.397629310344828
357_SZ108	TCTGGGAGGTCGAGGCAG	60.363	TTGAACCTGGGAGACAATGGT	59.22	892	357	chr11:57509834+57510725	Schizophrenia 108		11	11	57742362	57743253	892	99.7% (1 x 2)	TCTGGGAGGTCGAGGCAGGAGTGGATGGCCAACACAGGGAGACCCTATTTGAAAACAAAAAACAAAAAAAAGACACAATATTGTTTTCTGTCTAGTGTGCCCTAAGTGGAATTTATGTCCTTTGGGAGACTGTAGTTGACTTGCCCTGGGGGTATGGACAAGTTTTCCATTTGGAAGTTTATTTCATGTTACTTCATTTATGCTTATCCCTACCCTCTTCTGTTTGGTTCTTGGGTGTTCTGTTACTGTCCTGTGTTAACACTGCATTACAATACCATTAAATTTGGTTACAAGGATTTTGACCTTGTCTTTGTCCCTAGTGCTTCATACAGTGCTTTGGCATGTTGTTCTGCACTTATTATGTTGAGTGAGATTTGGAGGAAGGATGCAATCCTTGAG…	0.409192825112108
358_SZ108	cctggccaattcatttctctgc	60.16	ttgtgtctctgcaattTTAATGGTC	58.55	911	358	chr11:109377501+109378411	Schizophrenia 108	Via online Primer3.	11	11	109506775	109507685	911	99.8% (1 x 2)	CCTGGCCAATTCATTTCTCTGCTCTTTTCTTTTTTTCTGATACCTTGCTGAGCACAGATATTAGCAAGCAATACATACTGATGACATTCTGTTTTTCTACCTCTTTCCCGTTGCTAAAATTTCATTAAGTGCATGATTGGACTTCCAAGTTGTTATAGACATCAGTTCTACCAAATGTTTTGCCAGCATACAATATGGCAACTATTCTAACTCCTCAGAATAGTTTCCTTCCCACCCACCACCTGACCCCTAAGCTAATGGCACTTATTTTAGGCTTTTTTTGTGTGTTGTCACCTCACTTCTAGGCATATACTTCTGTATCAGTCAAGATATAATAAATTATGCTGTGATAAGGAACAGCCTCAAAAATCTCAGTGGCTTAAAATAACAAAGATTTAT…	0.394072447859495
359_SZ108	AGAGACACAAGGGAAGCTCG	59.394	GCTCTTCTTCCAATGTCACCTTC	59.562	915	359	chr11:113392550+113393464	Schizophrenia 108		11	11	113521828	113522742	915	99.7% (1 x 2)	AGAGACACAAGGGAAGCTCGAGGTCAGGCTGTTTAATTTAAAAAGTGCAGAGGGAAGCAGCAAAGGGTTAAGAAGAGCTGCCCTCTGAGGCATGCCCAAGATGACTGTGCCTGGCTAGGGTTGGAAAGGGAGCTGATGGAAGGAGGAGCCCAAATGCAGGAAGCAGCAGTGCCCAGGCCCAGAGGCTGACCATGCAGGGCTCCTTCAAGGCACTGCAAGCACTCTCTTCCTAGGAGCTTGTGCTTGATCCCCCCAGGACTCCTAGGGTGGTCTGTGAAGCACAAGATTCATGAGGGGAGAGAGAGAGCATGACTGGGAATCAGGAGGCTGACTTTCTGAGACATTCCTTTCCCTTCTTACTCTTGTTTTCCCCATCCAGAAATGCAAGATGAGCACTCT…	0.516939890710382
360_SZ108	aatgagctgagattgcacca	57.5	caCTGAGGAGGAGGGCTT	57.86	912	360	chr11:123393981+123394892	Schizophrenia 108	Via online Primer3.	11	11	123523273	123524184	912	99.3% (1 x 2)	AATGAGCTGAGATTGCACCACGGCACTCCAGCCTGGGCAACAGAGTGAGACTCCATCTCAAAATAAATAAATAAATTAAAAAGACACTACAGTTAGTCTTCAGTGTCATTATCTGAAAATCATGAGGTACTGCCTTATAACATGGATGTGAAGATTAAGTCAGAGAATACAGGCAAAATGCTTAGCTTGATGCCTGACATAACTAACCCTCAATATACTCCTATTAATAGCTGAGAAGGAGTTGACTTTTTGGATTTTTGTTTTTGTAGTTAAAAAAAAAACAGCTAGAGCAAAAGCCAAAAAAATTTACAGTTACAATAATGTTTCTAATATAATACTTGGAAATCTTTGATCCAGGTTTTCTGTGTTACTTGTGATCAGAGCAGTTGATGGGCCAGG…	0.395833333333333
361_SZ108	GGCATCTTGAGCACGAATTG	57.816	GAAAATGCAGCCCAGTCAAC	57.93	900	361	chr11:124613487+124614386	Schizophrenia 108		11	11	124743591	124744490	900	99.1% (1 x 2)	GGCATCTTGAGCACGAATTGAAGAATGTGAAGCCCAGGAAATGAGGCTAACCTTGGGAAACATGGCGAGGGGAACCATTTATAAGCCGGGGCTTGGGCATCTGGAGTTTAAGCTTGTGGTCCTGGGGCAGAATCTGGCTAGGACAGTGATCACTGAAGCCTTCCTCATATCCTGTCCACTTCTATGAACCGGATGGATGATGGCAGGGAGAGCTAATGTGCAGAACTGAATTACCATTATTATGTGAAACCTTGGTCATCTCGTGTCCTAGAAGAAAAAGATAGTCAAAGCAGTGGAAGACTTCATGAAAAGAAAAAAAAAAAGAAGGAGGCAAATTCCTAGAAGCCAGTGAGCCAGATCAAAGGAGAAATGTCCTTCTAACTTCATAGTAACCATCCC…	0.432222222222222
362_SZ108	aggctcagcttcagtttcct	58.94	CCAAGTCCCAGTAACTCGGA	58.74	910	362	chr11:125461456+125462365	Schizophrenia 108	Via online Primer3.	11	11	125591561	125592470	910	99.4% (1 x 2)	AGGCTCAGCTTCAGTTTCCTTTTGTTAAAGTAAAATTACATCGAACACTTACTACTAAAAACAAAACCAAAAAAAAGCAGATCTATTGAATCATAACGTCCTGGGGCGAGCCTGGTCATGTGGATTTTGAAAAAAATGCATGTGATTCTGAAGCAGTGATTTAAATAATGACCTTTCAATAAGTGGTGGGTTCCGTTCATGGGAGAATAGGAAACTGCGTGAGTGGTAGAGGCAACAAGTTCGAAGAGCTGCGAGACGTTCCCACTCTCTCTGGTGTAGCCTTGGCTCACCGAGGCGCGCAGGGAGTGGAAGTGCCTGAGGATAAAGGTGTACACGTGCGAGTCTGAGATGATGGAATTGCTGCTCAAACTTCGTCCCCTTCTCTGCCCTCAGCAAACT…	0.503296703296703
363_SZ108	GTGAATAAGTGGGGACTACTGCA	60.055	TTAGGGAGGGAGTGCAGGG	60.307	920	363	chr11:130718168+130719087	Schizophrenia 108		11	11	130848273	130849192	920	99.8% (1 x 2)	GTGAATAAGTGGGGACTACTGCATTGAGCTAAAATCTGTTTTTTTTTTTTGTTTGTTTGTTTTTTTAACCTCCCACTAATTGGTTCCATTCTACCAACTGGGGTCACATAGAACAAGGCTAAGTCCCTGTTACATATGTTACTAGGACTGGCTATGTAATTTGCAGGGCCCAGTGCAAAATGAGAATGTGGGGCCCATGTTAAAAATTACTAAGAATTTCAAGATGGTAACAGAGCATTAAGCCAAGGGTGGAACCCTTCTAACTGCAGAGCTCTGTGTGGCTTTACAGGTAAGCAACCCAGAAAGTTGGCGGCGTAGGGAACTTTCTGTTTTGTTTCTGAATGACTGGATTTGGTACAGTGTTAATAGAAGGAAACTATTTTTCCTCCACTTTGTGTT…	0.458695652173913
364_SZ108	CCCTGATGACATGTGATATGAAGC	59.545	ACTTCAGTGGTTCTCCTCTCAC	59.369	920	364	chr11:130817126+130818045	Schizophrenia 108		11	11	130947231	130948150	920	99.7% (1 x 2)	CCCTGATGACATGTGATATGAAGCATCTGTCCACGTGCTTACTGGCCATCTGCATATCTTCTTTGGTAAGGTGTTGGTTCAGGTTTCCATTTTTTAATTGGGTTGTTAGTTTCTCTTAATTGTTGACTTTTTAAGGGTTATTTTTGTATATTTTTGAATAATAGTCTTTTATTAAATTTGTTTTTTGCACATATTTTCTTTCAGTCTATGGCTTCCCTTCTCATTCTCTTGACATAGTTTTAAAAAGTCTTGGCTATAAATCTGAAATCTGATTATTTGCCTCTTCATGCCAAAAGGGAAGAAAAGAAAAAAAATCTAGTTAGTTGAGGATTTAGGTTACTATTGCTCTGATTGGTTGAGGCTTTCTCATCTCTGGCTTTGGCAGGCAGCGACATGCCC…	0.428260869565217
365_SZ108	TGCAGCTGTTGTAAAAGGGG	58.673	AATGTTCGGGACCAGATGGA	58.715	884	365	chr11:130830290+130831173	Schizophrenia 108		11	11	130960395	130961278	884	99.5% (1 x 2)	TGCAGCTGTTGTAAAAGGGGTTGACTTTTTTATTTGATTTTCAGCTTGGTCACTGTTGGTGTATAGAAGAGCTATTGATTTGTGTACATTAATTTTGTATCTGGAAACTTCACTGAATTCTTTTGTCAGTTCTGGGAGCTTTCTGGAGGAGTCTTTGGGGTTTTCTAGGTAAACAATAATATCATCAGCAAACAGCAAGAGTATGACTTCCTCTTTACCAATTTGGATGCCCTTTATTTCGTTTTCTTGTCTGATTGCTCTGGCTAGGACTTCCAGTACTATGTTGAAGAGGAGTGTTGAGAATGGGCATCCTTGTCTTCTTCCAGTTTTCAGAGGGAATGCTTTCAACTTTTCCCCATTCAGTATTATATTGGCTGTGGGTTTGTCGTAGATGGCTTT…	0.369909502262443
366_SZ108	CAGCAGACTGGGCTCACAC	60.67	ACTCTGGCCCTCACTCCAA	60.152	937	366	chr11:133822103+133823039	Schizophrenia 108		11	11	133952208	133953144	937	99.7% (1 x 2)	CAGCAGACTGGGCTCACACCCATGGGCAGCGCCTTTTGGGGAATGGGCATAAGCTGCCTATCCAACCCCAGAGTCCTCTGGAGTGAGCAACTGAGACACAGCCACACCCTCAGGGAGACAGAGAGGCCCTGGGCTGGGGCCTGCCACTCTGGTAACCTCTGTGCTGCCTAGACTGCAGCACCAAGGGCACCGTGGCAGAGTGGGAGGGGATATGAAGGCAAGAAGTTGGCTCCAAGGGTCTCTCTGCTCTCAGGGCTGCAGCACGGAGAGGAGTGGCCCCCACCTCGTGTCTGCACACTAACTTCCCCACCCTGCCACTCCACGCACGTGCACACAAACACACAGGCACTCAAGCACTTGTGGGCAGGCACACATACAGATTTCACATGTATGTGCACA…	0.556029882604056
367_SZ108	ATGGTGTGCTTCTGGAAGGG	59.961	ACACAGTGAAAGGGACAGAGG	59.582	921	367	chr12:29916796+29917716	Schizophrenia 108		12	12	29763863	29764783	921	99.7% (1 x 2)	ATGGTGTGCTTCTGGAAGGGGAGACCTAAGGTGATGAAGAGCATGGAGTAAATAAAGAAGTGAGGAGGGGCAATGGGAAGCAAAGATGGAACATTAAACTGGAGCCAGTTGATTTTATGACAATGTAGGCTGAATTGTAGGATGCTGGAAAGTACAAAAGCAACTGGTCAGTTCATGGTTAGTGAAAAATATATGCAAATGGCCAGCATGTATTTTAGCCTCAAACTACAGGTTTCCATTACCAACATGGTGGCTATAACCTGGGAACTGCAGCCTCTAACAAATATTCAAACACTGGAAGGAGAAACATCAGTGAACATAATTGGATAGAATTCAAATAATGTAACAGCAGATCCTCAGATCTTCTAGCAAGGTTAACAATATCACAGGCAGAAATTT…	0.386536373507058
368_SZ108	ggttgcagtgagtgaagatcat	58.66	acaagaaaatactgtgtggtgagg	59.18	903	368	chr12:57622114+57623016	Schizophrenia 108	Via online Primer3.	12	12	57228331	57229233	903	99.5% (1 x 2)	GGTTGCAGTGAGTGAAGATCATGCCACTGCACTCCAGCCTGGGTGACAGAATGAGACTCCGTCTCAAAAACAAAAAACAAAAAAAATTTTTTTTGAAGACAGTCTTGCTCTCTTGCTCAGGCTGGAGTGCAGTGGCTTGATCATGGCTCACCTTGAACTCCCGGGCTCAAGTGACCCTCCTGCCTCAACCTTCCCAGTAGCTGGGACTGCATGCACATACCACCATGCCTAGGTAATTTAAAATTTTTCCTTTTGTAGAGATAGGGTCTCACTATGTTGACCAGGCTGGTTTAGAACTCCTGGCCTCAAGAGATTCTCCTGCCTTGGCCTCCCAAAGTGCTGGGATTACAGGCATGAGCCACCATGCCCAGCCAAAAATTTTTTTTTAATTAAAAAAAA…	0.467331118493909
369_SZ108	AAAGTGGAAACAATGTCTAACAACT	57.595	CTTGCCCTCTCTCTCCCAC	59.096	920	369	chr12:92246332+92247251	Schizophrenia 108		12	12	91852556	91853475	920	99.4% (1 x 2)	AAAGTGGAAACAATGTCTAACAACTAGTAAATATCTATATCTATACAATCTAACATCATTTAGCAATAAAAAATAATGAAATACTGATACATGCTACTACTTGAGAACCCTGAATGCATTATGTTAAGTGAAAGAAACCGGTCACAGGAGACCACATATTGTATAATTCCATTTATTTGAAGAGCCATGAACAGGCAAATCCATGGAAACAGAAAATAGAATAGTGGTTGCCTGGGGCTGCGGTGGTGAGCTGGAGAATAGTAACAGGGAATAACTGCTAATGGATATGGGTTGGGGTTTCTTTTTATGGGTTTTGAATATGTTCTAAAATTAGATTGTGGTGATGGTTGCACAACTCTGAACATACTAGAATACTACTAAATGGTAAGACAAACAAGG…	0.375
370_SZ108	AAGGTGGATCTGTGTCCCAG	59.013	AGGTGGGTCTCCATATCCCT	59.047	929	370	chr12:103595992+103596920	Schizophrenia 108		12	12	103202214	103203142	929	99.5% (1 x 2)	AAGGTGGATCTGTGTCCCAGAGTTCCATTCCATTTACAGTATCTTCTTGGATCTGTTTACATACTTCACTTGAAATAAAGTATTTTGCTAAAGAGTCCAAACAAAGGCCTTTTGAGACCCATTTACTCAGGGAAAAGAATGGGTCTACCCATTCTTCAGATGAATCTCTACAAATACTTCTTCTTTCCAAGATTTTCTAAGTGTAGAGGGACAAGGATTTGAGATCATACACCCTGAAAATACCTGGAAAGGAGTTAGTATATCTCCACTTAACAGAAGACCATTGAGTGTTAACAGTTGAGTCTAACTGGAAAATCTGGAAAGAATAAACTGTGTATGCTTGCCTCAGCTCATCCATTTTTCCCTTTTGGAGAAGCTGCCACAGGAAGTTTTCTGCTT…	0.407965554359526
371_SZ108	AGCACTGACTCTCTTTTTGTGT	58.121	ACTCAAGGGGGTCTAGTAGGA	58.705	938	371	chr12:110722777+110723714	Schizophrenia 108		12	12	110284972	110285909	938	99.3% (1 x 2)	AGCACTGACTCTCTTTTTGTGTCAGTTTATTCCTATTGATGTAACAGAAAAAACATGGTAGAATATTCAGGTTTTTTTGGAGAAGTGACTAGGCGATTCTTATATACATCATGCGTCATCAAGTCATGCTTAAATTAAAAAGAATATTAGTGACTTACTTCAAATATCAAACTAAGTAGTAAACTGTTAACTATAGTTAATATTTTGCTGTGGCATAGAATAGGAAGCTATGCTTGTGACCTGTAGGGATCTAGTTTAATTTGTAATATTGGCCAAAGTGTTTTTTTGAAACGGTCACTTGGATTGAAAGAAATAAGCTTCATCTTCCAGTGCATATGAACATTAGAAATTGCTTAATTTGACACTGAAGACCCCCCCTCTATCATTCACTTTATCTTT…	0.371002132196162
372_SZ108	TCAACCATACAGCCAGGACC	59.382	TGCTTATCCTGTTTCAGTATCCTT	57.686	915	372	chr12:123664667+123665581	Schizophrenia 108		12	12	123180120	123181034	915	99.3% (1 x 2)	TCAACCATACAGCCAGGACCAACAGTTCAAGGAAAACAAATGAGAGCAAAGCACCGGCCTACACAAGTCCCTCTGTGTAAGTCCCCTGGGTAACAGATACAGCCCTTTATACTTTGCTTAATTAGAAACAAATCAGTGTTAAAATAACTTGACTAAAACCTCAGAAGGATGGTAAAACAAATATTTTCAATGAGATTTAGATATCATGGGATCTGCTCCCGAACCCTCAGAATGCTTTGGCAGCCAAGCTATGCAGGCCTTTTTGCTGAGCTTCAATAACCACAACCCTCCATTCTATGCAACAGAAATACTTGGGCCCCACTTACACCATCGTCGAAGGGTTTTACTGAATGCAAATATGTAGTCTCCAAACAGAGCTTTCAAAAAGAATTCAAACAT…	0.414207650273224
373_SZ108	GGTGTTTTGTTTGTTTTGAAACGGA	60.05	TGAACCTAACACTGGAGCTTCC	59.961	893	373	chr12:123731001+123731893	Schizophrenia 108		12	12	123246454	123247346	893	99.8% (1 x 2)	GGTGTTTTGTTTGTTTTGAAACGGAGTTTTGTTCTTGTGCCCAGGCTGGAGTGCAAATGGCACAATCTCGGCTCACTGCAACCTCCGCCTCCCAGGTTCAAGCAATTCTCCTGCCTCAGTCTCCCAAGTAGCTGGGATTACAGGCACCTGGCACTACACCCAGCTAATTTATTTGTATGGTTTTGAAGGTTCCTTTTGGAGTTGATTTCCAGTTTTATTCCACTGTGGTCTGAGAGAGTGCTTGATATAATTTCAATTTTTTTTTTTTTTTTTTTTTTTTTTTTTTTTTTTTTTTGAGATGGAATCTCGCTCTGTCGCCCAGGCTGGAGTGCAGTGGAGCAATCTTGGCTCACTGCAAGCTCCACCTCCCGGGTTCACGCCATTCTCCTGCCTCAGCCT…	0.433370660694289
374_SZ108	TTGAGGGCAAGACTTGGGG	59.54	ATTGCTCATGAGTAGATGGATTGG	58.69	910	374	chr14:30190150+30191059	Schizophrenia 108	Via online Primer3.	14	14	29720944	29721853	910	99.6% (1 x 2)	TTGAGGGCAAGACTTGGGGTGGGATAAAGGAAATGTCATCGCACTCTCACATAGCTGTAGCTCTCCTGAGAGTTCTGTTGATTTTTTCATTCCTCCTTCATCAACTACATCAAAATGGTTATTATGTTTGTTCACTTTTACTTCTAAAATATTTTTGACCTCTCTGTCTCATTTTCAGCTCTTCTGTCATAGCCCGAGAATAGGCCCACGCCTCTTCTGCCTGGACTACAGTGCCAGCTCTCTAATGAGGCTCCCTTCTCTTGATAGTGAGGACCAAAAACTAACTACATGTGGAAATAGCTTTTTGCAAAAGTTATAATACAAGATAATCTACTGTAAATCTATAATGAAAGAAGCCCAAGAAAAACATTTATTTTTTAACCTTAAGTGTAAGAAGGA…	0.354945054945055
375_SZ108	tgataacgcactgtcttaattacgt	58.91	tttctctctctcctcagcct	57.08	900	375	chr14:72416757+72417656	Schizophrenia 108	Via online Primer3.	14	14	71950040	71950939	900	98.8% (1 x 2)	TGATAACGCACTGTCTTAATTACGTGAGCTTTATAGGAGGTCTTGATATTCAGTAGTGTGCACCCTCTAGTTTGTTCTTATTTAAGAATAACTTCTAAAGAACAAAGCTGGAGGCATCACTCTACCTGACTTCAAACTATACTACAAAGTGACAGTCACCAGAACAGCATGGTATTGGTACAAAAAACAGACACATAGACCAATGGAACAGAATAGAGATCTCAGAAATAAGACTGCACATCTACAACCATCTCATCTTCCACAGACATGACAAAAACAAGCAATGGGGAAAGGATTTAATAAATGGTGCTGGGAGACATGGCTAGCTATATGCAGCAAACTGAAACTGGACCTCTTCCTTACACCTTATCCAAAGATTAACTCAAGATGGATTAAAGA…	0.372222222222222
376_SZ108	TGGAGAGAACATTCCCAAAGCA	59.892	AAATCCACCATCACAGGCAGT	59.924	919	376	chr14:99718771+99719689	Schizophrenia 108		14	14	99252434	99253352	919	99.8% (1 x 2)	TGGAGAGAACATTCCCAAAGCAGCACGTAAATCCCTGGGCTCGTCAGAAGTCCTTTTCTCTCACACATTTTGCTTAGCAATGGGTCACTGGGGCCCCAAACCAAACCCTTATCTGTGCCCCACCTGCTAAGAGAATCTCCCAGGTAGATCCCGCGTCCTCCCTAGGTTGTGGATGAAGACATATCAAGTGGGCAGGGACATCGCAGCCAGGGCTGCCTGCCACCTCCAAGCCCAGAGGGATCTGCCACCTCCTGTCACCTGCTGCCTGTCTCCGCACTTCTCCAGAAAACTGACATTCAGGACTTGGAGGGTTACGGAGGCAGGCCTATGAGTGACAGCTGATAGTTAATTCCTCCCTCTGTAGCTTCATTTGGTTATGGAAGGGCTGAAAACAGGCAA…	0.529923830250272
377_SZ108	GCATATGGGAGGATGCGAG	57.85	ACATGCCTATAATGCCAGCT	57.034	891	377	chr14:104046392+104047282	Schizophrenia 108		14	14	103580055	103580945	891	98.5% (1 x 2)	GCATATGGGAGGATGCGAGTAGGTTATTTGCAAATATTTGGAGACAAAGCCTTGCTCTGCCACTCAGGCTGGAGTGCAGTGGCGCGATCGTGGCTCCCTGGAGCTTCAACCTCCCAGGCTCAAGCCATCCTCCTGCCTCAGCCTCCCAAGTTGCTGGGACTACAGGCACATGCCACCATGCCTCGCTAATTTAAAAAAAAATTTTTTTGTAGAATTTTTTTCTATGTTGCCTAGGTTTATTACAACATTATATTTTATTTTATTTATTTTTCGAGATGGAGTATCAATCTGTCACCCAGGCTGGAGTGCAGTGGTGCAGTCTCTGCTCACTGCAGCTTCCGCCTCTGGGTTCAAGCAATTCTCCTGCCTCAGCCTCCCAAATAGTGAGGACTACAGGCA…	0.483726150392817
378_SZ108	AGGGAAAGCCAGGACACCA	60.774	TAGTTGAGCATGGTGGCACG	60.673	880	378	chr15:40566773+40567652	Schizophrenia 108		15	15	40274572	40275451	880	99.9% (1 x 2)	AGGGAAAGCCAGGACACCAGCAATCCCTGCTGTCCAGGGAGGGATCCGGAGAAGCTTCACTGAGCACAAACCCTTCTAACCCGTGTCGGGAGATCCATACCATGATTCGATGTCCCTGTCCATCACGGCGAGTCGGCTCATGCTCCATCGTTGCACACCCCGACACAGCTAAGCCACAGCGTTCCCCTTAAAGCCAGTATAAGTGCATGGAAGTGTATACATGTAACCCTTTTTGCCAAATCGGCCCCAACCCCGCAGGCCTTACTGTGGACGCCCCCTGCTGGCAGGTCAGCACGGGGCTGCTAAGTGGCACCGCCATCTGGTGGCCAAAACAAGAAATGTCTCAGAGGGCTGAAGCCTCTCCTCTAAAATAGCAAAAAAACAAGAGTTCTGTGGCCC…	0.5
379_SZ108	GCAAACTAGTCCGGGGGTG	60.377	GAATGGCCTGGAAGGGTGG	60.38	925	379	chr15:40595173+40596097	Schizophrenia 108		15	15	40302972	40303896	925	99.7% (1 x 2)	GCAAACTAGTCCGGGGGTGGGGGTGTAAGCCACCCCTCCCAGACAGACTGGGGTGCTTTAGGGGCAGGAGGTGACCCCTCCTCCCAGATCCCTGCCATCTCAGCTCACTGTGCGCAGTTCTGAAGCTCAGAGCCCAGGCGAGCCCAGGAGCTGCCGCTCCCCTTCCTTGGCTTCCAGCCACGGTCCTTGCTGCCCAGCCAAGGAACCATTCCCCGTGCTTCAGAAGTCAGGCTTCCCACCCGCACAGGGACCCCTGCCCTTGCCCCATGGAGCTAGTAGCTGTGCTTGAGCCTGGGCTGCTACTGGACACACCTACCTTGGGCATCTTGGCAAACTTCCCAAAGCGAGTATCCCGGATGCTGGTGATATCCAGAAACTCCATCTCCTGGGGGCAGGGTG…	0.597837837837838
380_SZ108	TCCATCAGCACCTAGTACAGTC	58.975	ACTTTGGAAGCTCTGCCACA	59.817	915	380	chr15:61839657+61840571	Schizophrenia 108		15	15	61547458	61548372	915	99.8% (1 x 2)	TCCATCAGCACCTAGTACAGTCTCCAGTTCACAGTTAATGAATTTCTAGGAATTATGCCTGCAATTCCAGAAGCTGTCCCACATACATGTTGATTCCTTTAGAAGTCATAGAGACCTATAACTGGAAGAATTAAAGAGCTGATGCACCTGTACATCCTAACCATCCTCACAGGACACACCCAGGCACTCCAGTTATCTATGGACTTTCAATTGTGTCATGGAAAGCAGAAAAATCTATTTTTGGCAATATAGTCAGGTAGGATAGAAACAAGGAGATAGTCTTCCACTTTATCCTTCTGCTGGAGATAGATAGTCTTCCACTTTATCCTTCTGCTGGAGATAGCCATCTGTCATCTAACATTATTGAGTACCTGGTATGTATCAGGCCCTCCCAAAGTC…	0.448087431693989
381_SZ108	TGGAGCATTTGTAAAGCTGTGG	59.44	TGCATTTCGAGTGTAATAGGCA	58.13	916	381	chr15:61854567+61855482	Schizophrenia 108	Via online Primer3.	15	15	61562368	61563283	916	99.4% (1 x 2)	TGGAGCATTTGTAAAGCTGTGGTTCTGTTGGCTAAAAGCCAGAGAGTAGACTAGAGAGGTACTTAGGAGTCAGCAATGGAAGGCCTTGAGGGTTGGGTGGGAGGGAGGAAAGGGGCCTGGGAGTCTCCCCAGGCTAAGGCTTAGATGACTGAGGACCAAGAGGGGCTGCTCAGTGAGACTCAGAGCAAAGATGAAAGCAGCACAAAATAAGGAATTGTGAGAGGGCTCTCGTGTCTTCCTTGATATCACATAAGAGATTCATCATCCATATTTGATGAGAATCATTGGTTTGGTGTTTTACCTCACCTGTGGACAAGGAGCCCCACATGGGTGATGCCTATATTCTAAGAAGCTTTCCTTGCCTTGGTTCTGAACCTGCCTCTCAGTCTCCTCTGAGTT…	0.465065502183406
382_SZ108	CCTCTGCCCAATGTGTGCTA	60.035	CAGAATGACCTGTGTGCAGC	59.48	915	382	chr15:70588825+70589739	Schizophrenia 108		15	15	70296486	70297400	915	99.7% (1 x 2)	CCTCTGCCCAATGTGTGCTACTTTTGTACCTATTTTAATGTCTCTATTGTTTAACTTTGCATATGTAAATAATATTTCTGGGCCTCTATTTCTGGAGCCATTCGGTAAGATAAGAATATTAGTATTCCTATTTTCCCCCCATCTTTGTCCACCTCTATCTCCCAATTTCTTATTTCTTTCATCTTTGTCTTCTATTTTGTCCTTATTATTAAGCCTTTCCTATTTTGTCTATGAAAATGAGGCTCAGTGTTTATGTTGTTGATTATGTGACTTTGTTCCCCAAGGAGTGTATTGTGAGTGATCATAGTTCCTTCTCTATGGTTACAATATCATTACTCCTGTGCCTCTAATAATCAAATGCTTCCAGCATCAACAGTAAGAGAATTGTCCTTTCTTACT…	0.39344262295082
383_SZ108	CCTTTCTCCAAGGCCCAGAC	60.323	CCTCAAGCAATCTGTCTGCCT	60.34	918	383	chr15:78907565+78908482	Schizophrenia 108		15	15	78615223	78616140	918	99.7% (1 x 2)	CCTTTCTCCAAGGCCCAGACCTTTTCCCAGTGGGAGGAGGCCTGCAGGGTACACCGTGTAGCAGGGTAACTGTCTGATGGCAGGTTTGCTGTTGGGAGAGTAGAGAAGAGGTTTGGGGACACAGGCAGAGACAGGCTGGGGTGCCCAGCTCAGCCCCCTGATCACAGCATCGGCCTCCTGCATCCACTGCCCACAGTGGCCCCAAAGCCACAGTGGATGGCTGAGACCACCCCAGACCTGGCTGTGCCACACATCCACTCTGGGCCTCAGTCCTCATCTGTGAAATGTCAGGGAAGGGCCAGATCAGGGATCCCCAAAGCAAGCTGGTCACACAGCCCCCAGGACAGCTTTGTGAAAACACCCATTCCTAGGCCTACCCAGACCCACTGACTCAGTGTT…	0.5239651416122
384_SZ108	AGCACTGTCAGTCTCTCCAC	59.035	AGGATGTACCACTCTGTGCT	58.056	922	384	chr15:84705995+84706916	Schizophrenia 108		15	15	84037243	84038164	922	99% (1 x 2)	AGCACTGTCAGTCTCTCCACACACTTCTCTTCTGCCTGGTAGTCTTACGTGCTAAGACAAAGATTCCATGGATGGGCTTGGGTAGGTATGCTGATGTCCTGAAGTTATATGTAAAAACTGTAGGTTTATTTTTCTAGGGAGTAGGTGTGTAGCATTCATAAGTTTTTCAAGGAGTCCATGACCCTGCAAAAGTTAAGCATTGCTGCTCTGAGAACTCAAAGGAGCAGCATGGGCCAGAGGGACTGGGAGGGTCCAGAGAGCAGCAAGAGGTCACTTGGCTGAGCTGAAAGGGAATCCAATGCACTTCTGACTCTCATGCAAAACAATGGCCCTAACCCAAAGCTGGTTTCTTCACCTCACTCTGTGATCTCAATTTATGGCTTTTCATAAAGTCAAATA…	0.404555314533623
385_SZ108	CATGTTGCTGAGGAGTGAGGA	59.723	TCTTGATTCAGTCAGGCCTCC	59.443	900	385	chr15:91426131+91427030	Schizophrenia 108		15	15	90882901	90883800	900	99.8% (1 x 2)	CATGTTGCTGAGGAGTGAGGAATAGTTGAGCCCCAAGTCCTGAAGAGGCGGGCCAGCCAGGCGGGCTCAAGGAAAGGGGGTCCCAGTGGGAGGGGCAGGCTGACATCTGTGTTTCAAGTGGGGCTCGCCATGCCGGGGGTTCATAGGTCACTGGCTCTCCAAGTGCCAGAGGTGGGCAGGTGGTGGCACTGAGCCCCCCCAACACTGTGCCCTGGTGGAGAAAGCACTGACCTGTCATGCCCCCCTCAAACCTCCTCTTCTGACGTGCCTTTTGCACCCCTCCCATTAGGACAATCAGTCCCCTCCCATCTGGGAGTCCCCTTTTCTTTTCTACCCTAGCCATTCCTGGTACCCAGCCATCTGCCCAGGGGTGCCCCCTCCTCTCCCATCCCCCTGCCC…	0.577777777777778
386_SZ108	CTTTGCGCATATCTCCACCG	59.417	TTCCATTACAGTATTCTCAGTGTCT	57.518	927	386	chr16:9945854+9946780	Schizophrenia 108		16	16	9851997	9852923	927	99.1% (1 x 2)	CTTTGCGCATATCTCCACCGTAGCATTTTATATTATAACCTCAATGACATAACTTTTGAGCACTCCTGTACAGTCAGGAAATGTGCCAATATCACCACTTAGTTTAATTCCTACAAACTCTACATGGTAAGCATTATTATTCCAACTTCGTAGTTCAGGAAACTGAAACACAGAGAGGTTATGTGACTTGCACAAACTCACACAGCAATAAGTGGTGGAACCAGAGTTATAACGTGGGGCTTTCTGAACCCAAAGGTGCTTTCTCGCTATGTACAGTGTTTCTGTGAATTGAGCTACAGTAACCACGTTATAGCTCCAACACTCTTCCTTCCTTGCAGACATGTTTCCTAAAGTCCCAAGATAATGTAAATTAAGGCAAAGACTAGCAGAATCTTTGGT…	0.427184466019417
387_SZ108	CAGTTAGCACCCTAGGCCC	59.473	ACCGTAAGTGGAACATCAGAAG	58.073	933	387	chr16:13749397+13750329	Schizophrenia 108		16	16	13655540	13656472	933	99.2% (1 x 2)	CAGTTAGCACCCTAGGCCCAGACTGTGGTCTCTACATACCATTGTCCATAAGAAGAAAGTAGGGCCACCTGAGGAAATGGTTGACTGTAGAACTAAGATACGAAATAAAAAATAAGAGCTTGAGACATTCTCTCTCTCTGTCTCTGTCTCTCTGTTTGTTTGTGTGCATGTGAGCCTGAAAGCAAAGAAGCTATCAAAATAAATGTTTGCATCAAAATGACACAAAGGTTAGCCTGAAGGGACTTCCATTGGCCAAAAATAAGACAATCTGAGCATTAAAAAAATGATCACAAAGGATTGAGCACAACAACTACATAAAATTCATGAGTTCTTAATTATAACAAACCTAAAAAGCAACTGGACCCTTTGGCAGTTGGTAAGGCACCAACTCATTATTCT…	0.361200428724544
388_SZ108	GAATTATCCCTACTTCCTGATAGCA	57.754	GCACTCCACTCTGGGAGA	57.88	920	388	chr16:29939425+29940344	Schizophrenia 108		16	16	29928104	29929023	920	98.3% (1 x 2)	GAATTATCCCTACTTCCTGATAGCATCCAACCCAGAGCAAATGCCCCCCTTTTTGGACCCGCCTAGGAAGTCCCCTAATGAAAGTTCCAATCCTGTAATAAGTCCTTTCACACATGTTCTTGCTGAGATGTCTGTGGTGTTCAGCCTCCCTTGTTCAACTACAGGTGCTTCCTGGTGGTCCTTGGTTGGAGGGTACTATCAGAAATGGAGGAGCAACAAAGATTCAGCTGAAGCCCTCACTGCCTGGGACTGGGACCCTTGACTCGTCATTGTATGCACACCTGAAACTGCTTATGTCGCTGAGGTGCCAACCTGCTGATGGTTGGAAGCTAATTGAGTTCTGATATTGTGTTGATACCCTTAAGCATTGGGTTTACTTTTTATTTTAATTAATTAATT…	0.471739130434783
389_SZ108	TGAAGCTCAGACAGGTTTGTTTG	59.622	CCCTGCATGAGATTTAATCAAAGCA	60.163	880	389	chr16:58680984+58681863	Schizophrenia 108		16	16	58647080	58647959	880	99.8% (1 x 2)	TGAAGCTCAGACAGGTTTGTTTGCTCAAGGTCACATAGCTATATGTGACCATATATATGCTATATGCCATATGCTATATGGGCTCTGCTATATGTCAGAGCCCAAATTTGAACTAATCAGTCTGTTTCCGGGGCACATATTATGCTAAACTTCTTTCCCTACATGATGTAAATCCTCACAACACTAAGTTTATTGTTGCCCATTTCATAGATGAGGAAACTAAGGCCGGCAGAGGTTAAGGAACAGCTGGGAGGTGTTGGAGATGAGACTTGTATGGCCTCTGGCTCATCCAGGCGTGTGAACTGACTGCAGCTTTTAGTATGCTCAGGATGGTTTCCTTTCCATGGGATTTTACTCATATGATCTGAAATTAAGGTCCACGAGGCAATGGATTGGTGA…	0.475
390_SZ108	AGAGGGAAGACAGAGAGCAGT	59.923	GCCTTCTCTCAGTCTGCTACC	59.864	915	390	chr16:68188877+68189791	Schizophrenia 108		16	16	68154974	68155888	915	99.7% (1 x 2)	AGAGGGAAGACAGAGAGCAGTTATAAGGCTATTGCAATAGTCCAGGCTTTAATTGCTTCTTTATAAATGTTACAGGACTGAAAACTATCCTGGGTAAAATTGTATTACCTAATAATAGGCAAAAGTCTTAATGTCTTCTTCTGGGTACAGGGAGGATAACCAATAAATTATGAAGTTCGCTGGTTACAAGTTCCACTGTAAAGCCAAGGCTGGACAAGTAGGCGGGAATAAAACTCACCTGTAAGACTCCACCAAATACAAGGAGGCTACTATACCAAGGAAGAGGAGGCATGGCAGGAGAACTGAGACCCCCCTCACTTCATAGTTTTACCTACTGAAGGCAGAAACCCTTAGGCACTTAGGCTGTCATTTACAAAGACTGAAGTATTATCAGGAGAG…	0.418579234972678
391_SZ108	TGGGTGAAAAGATCCAACAGTT	58.09	CCCGGCCAACTTGTACAATT	58.747	908	391	chr17:2208429+2209336	Schizophrenia 108		17	17	2305135	2306042	908	99.7% (1 x 2)	TGGGTGAAAAGATCCAACAGTTCAGAAGAGGAACCATTTGAGTGGTCAGAGCAGAAGACAGCCTTTGCCACCAGATTTGAGAGAAATAGGAAGAAGCGTTAAAAAATAATCTGTTTCATATTGAAATTTGAGAGGCCATTGCATGATTTCTTTTTTCAGCTGGAAAAATAATGGAAAACAAGAAAACTTTCTTAGGACAAATGGCACCACCCATTTAATGCAACAGTGTCAGTGAACTGCAGATTAGATATGCCAAAAGTTAAACCAGTTCAAGAAAATTTACCAGAACTCAGAAGGAAAAGGTAATAGATAAAAACTGAGAGACAAAGATAGGAGACATGGAGAAGGGGTACAAAAAATTAATAATTAAATACGAGTTCCAGAAGGGGATAATACAGC…	0.401982378854626
392_SZ108	GCTGGCATGAGATGGAGATG	58.475	CAGCATAGACGACAGAGCAA	57.716	918	392	chr17:17957934+17958851	Schizophrenia 108		17	17	18054620	18055537	918	99% (1 x 2)	GCTGGCATGAGATGGAGATGATGTTGTGGGAATCTGCCTGCCCACTGGCTTATCAGGGCAGAGCCACATCATTTCTTTTTATCCTGGCTGCTGACAGACAAGTATAGTCTTGTCTTAAGTACACCACTATAAATCCTGCTGCCCCCCTTTTTAACTGTCAAGTGTAGAGCATTCTCACTCAGCAGTAGTGAATGCTTCAAGACAGTTAGTGTCCTGGGATCTTTTCATTTGTTGTCATATAAGTACCATGTCTTCAAAAATCAGTGTCTCGGCTGGGCGCGTTGGCTTGCGCCTGTAATCCCAGCACTTTGGGAGGCCGAGGCGGGCGGATCACCAGGTCAGGAGATTGAGACCATCCTGGCTAACACGGTGAAACCTCGTCTCTACCAAAAATACAAA…	0.461873638344227
393_SZ108	ACTTATGAGGAATAGCTCAGTTACT	57.094	GTTTGTTTCAACAGATTTGTCCC	57.033	916	393	chr18:52751547+52752462	Schizophrenia 108		18	18	55084316	55085231	916	97.3% (1 x 2)	ACTTATGAGGAATAGCTCAGTTACTGAGAAAGCCAGATAATTGATATGTTTCTGTCTCTGCCTTGTCATTTCTATAATGGCAGGATAATGAAGTATTATTTAGCTTAACACAATCACTTGAGCTTCTCTATGGTCTTGGAAGGAATAGACACAAGCTAGGAACCTTTTTAAAGTATAATCAGTTTCTTATACAAGATTATATAAATAAAAAGTGGAATTAATTTAAATGACAAGTGACCCATTATTTATCTTCATTATGTCCTAGGACTGGTGGTTCCATGGAAATGAGTCAACCAAGAACATTTCGTTATTATAGAGACTGAGAGAATTTAGAGTAGATCTATATAAAATAATCTTTTAAATAAGATTAGGGTTAAAGTGCATTATGAAGCTTTATAT…	0.323144104803493
394_SZ108	GTGTATGACTGTGGCTTATTTGC	58.34	CTCCATCCCACCCAGTTCAA	59.3	926	394	chr18:52752329+52753254	Schizophrenia 108	Via online Primer3.	18	18	55085098	55086023	926	99.5% (1 x 2)	GTGTATGACTGTGGCTTATTTGCAAATTAGGTTTACTACTGTATCTGTGAACTGGGAATCTCACTTGGAGTAAGTACATTCTGTATTTTAGCAGCCCTTTCCACATGATTAGGGACAAATCTGTTGAAACAAACAAAGAAATAACAACTTTAAAACTTGCCAGACAATTGGAGGAATGTAGATTTCAGCTATGGGACAGGATTCCCAAAGGGTTAGTGATTTCTCCATAACTAGATGATTCTTTATAACTAATGGTTGGGAGAACTAGTGAAAATTAAAGCAGAAAAAGTGAGTTGTACCTATTGGAAAATCAGAGTTTCAAGAAGATAAATAAATGAATGAAAGTACTGGTGATTAATCTATACCAACAACAATGAAGCAATTGATAATGAAACATTT…	0.360691144708423
395_SZ108	CCATCGTGGTGGGTCAAA	57.189	GAAACCAGTTCTGTGCTCTTG	57.384	915	395	chr18:53194496+53195410	Schizophrenia 108		18	18	55527265	55528179	915	98.3% (1 x 2)	CCATCGTGGTGGGTCAAAGAGAGGTTCATCTAAATCAGGTGAGCAGAGGGAGGGACTGTAACAGCTATCTGGAAGAGTCTTTGTCCTGTGATAAAATCCACCCATTACTGTTTCCTCTCCAGAAAGAAAAATAGTAAGGAATTGTTTATATGCATACAAGCACGTTTCTCAATGAATAGGAAATACGGAGGAAGCAGACCAAAAATTCACATCCCTGGTTCTTCTAAGGCCTTGTAACTACCATAGATCATTGGAATTCATCATTTTCTTGGTGCAGATTCAACAAGGTGACATGTCAAACACACAGAGACAAAATGCACGAGGTATTTTTTCTCTAAATATTCAAGGTACCAGCAATTAAAAAGCATAACACCACGTGCATGATAAGCTCTCAATAAA…	0.366120218579235
396_SZ108	GAGGGCACAAGGGAGCTAAT	59.451	GCAATTCTAAACATGTGAGGGTACA	59.586	920	396	chr18:53199659+53200578	Schizophrenia 108		18	18	55532428	55533347	920	99.8% (1 x 2)	GAGGGCACAAGGGAGCTAATTTCTTTTGGAAGGCTGGTACCAAGGAAAGCTGAAAAGCCACCAAAGGAAGATAGAAAACCGTAATATGACCACTTCTGATAAGTACTGTCAAACCTAAACATACAAAGATGTGTCCTATTCTCTCACTAGTTTCATAGATTTGGAATATAAACAATGGAGCTGCAGGTCATGCACACTGCAAACTTCAAGAGGCAGTTCTAGCTTAAAGGATGGTCCCATCAAAGGCCCTTCTAACCCTAAAGTTCTATAATTCCACTGATATGCACTGAGTTCTACTCTGAAAAGGCAATTCCTGTCCCTTTACTCTTCGAAAGAGTTCACAGAAATGCCATGACTGCCTGGGATTGGTCTCCTATCTAGTAATAAGAGCTCTGAATT…	0.406521739130435
397_SZ108	ATCACCAATAATGCCAGTTATTCTT	57.097	TAGTGCACTCAAATGATCTTTGG	57.115	890	397	chr18:53532733+53533622	Schizophrenia 108		18	18	55865502	55866391	890	99.1% (1 x 2)	ATCACCAATAATGCCAGTTATTCTTTGACAAAAAATGCTCCTAGATAATACATTGGTTTCCTTTTCTTATTTCTCATGACAGCAACTGTGGAAGTCAAGGCCAGAAATCACTCACTATATCATCTGATATTCCTCTGATCGTTATACCTATTCTCAGTGTTAAGGAAATGAGACCAGTTGAAACGTCCACATTAAAATAAGAAGAAGGAGAGAAGGTTTTCTAATTGCAGGTCTCTGTTCTGATCCCATTACCATCTCCCTCTGATTATCATTCTCCTGAAAATCTTAGCTTCATTCATACCCCTTCCCTTCCCTTAGTTTCCTTTATGAACTTATTTATCTTCATGCAATTTGCCTGCAGTTAATGTCATCGTTAAATAAAGAATGCCATAAAGGAAC…	0.368539325842697
398_SZ108	TGAACCTGAGCTGGACCAGA	60.472	GCACCACACCCAGCTGATT	60.605	890	398	chr19:19472977+19473866	Schizophrenia 108		19	19	19362168	19363057	890	99.9% (1 x 2)	TGAACCTGAGCTGGACCAGAGCACAGCATGACGAGCCTGCCATGGGACCAGCCACCTTTCCAGCAGGTGTGCAGCCCCCAGCTGGGAGGTGTGAACCTGCATGTGGACAGCAGGTCTATCCTGGGTTGACCAATGTTTCACACAAAGCCTACACCCAGGCAGTCACCTTGGCCTGGGCGCCCGGCAGACTAGGGTCACACAGCTCCTCCTGTTGAGTCATTTCCGAGTAGGCTATGCCCTGTGCAGCATCCATGGGACCCTGACTCAGGAAGTGAGTGACCTTCCTTTTCCCACAAGCCATGTCCTCATCCATGTCATCCCTCATCCACTTAGAGGATGAGGCGGGAGGGAGGTTGAGGCAGGAGGATCGCTTGAGCCCAGGAGGTTGAGGCTGCAGCA…	0.530337078651685
399_SZ108	TGAACGTCGTCTCTAACCACAG	60.031	GATTACAGGCGCCCACGA	59.814	915	399	chr19:19477556+19478470	Schizophrenia 108		19	19	19366747	19367661	915	99.8% (1 x 2)	TGAACGTCGTCTCTAACCACAGTTCCTTACACTCAGTGTTTCTGCAGCGCAGGGTTCAGGCTCCATCTGCAGTTAGGCACACTCTGTCCAGAGTGAGTCTCTGTGTGGCCTTGGCGCTGTCCTGCTATTCCAGGGTTCTGAGCACAAATCCTCCCCTAAAGGGTTAAGCACAAACTGTTCAGAAGTCCTGTCGTGAACCGGAAGTGTATCTCCCACTCTGTCTTCATCTGCAAGTGTCCTCAGTTGCTACTGGCGGCCCCTGGCCTGCTCTGGCCTTGGCCACCAGGGGGCATGGTGGCCCAGGAGCAGCAAGGGCTGCCCAGGCAATGTCCCCACCAGGTAGGACAGGTGGGAACCTACAATCCAGCTAGAAAGACTGGGCTGGATGTTGCCAGACCC…	0.553005464480874
400_SZ108	TCTTGAAGGAATGTCCACTCTCC	59.738	GCTCCCAGCCCCTTTCTC	59.726	916	400	chr19:30986973+30987888	Schizophrenia 108		19	19	30496066	30496981	916	99.8% (1 x 2)	TCTTGAAGGAATGTCCACTCTCCGGGCGTTCCTGGGGAATCTGGTCTCCAGGTGTAAGGAGGGCTTGAGACTTGGGTTGCCTTTTCCACTGCTCCTGGCTCTCTGTCCCCATACCCTGTACCATGCAATGATCCTGGGCCATCCTGGAAGTAGCTCAGTCCCTACAAACTTTCTGTTCTGTCTCTGGAATACCCTCTGAGTTCTCGACTTGTCAAACTTCCACCCATCTCTTAACACTCAGCCGGATTGCCAGCTCTTCCAGGAAGCTTTCCTTATTGAATCAGTCTCCACAAGCAGACATTGTCACTTCTGGGGATGCCATGGTCCTTTGAAATGTTGTTTTAAGGCTCTTAGTGTCTCCTGCCTGGGGACAAAGGAGGGCATATCTAATGATCCTTC…	0.509825327510917
401_SZ108	TCCAAGTAGTACATGTGACATCCt	58.98	gcaggtggatcgtttgaggt	60.32	911	401	chr19:50090559+50091469	Schizophrenia 108	Via online Primer3.	19	19	49587302	49588212	911	99.8% (1 x 2)	TCCAAGTAGTACATGTGACATCCTTTTTTTTTTTTTTTTTTTTGAGGGCGACAGAGTCTCTCTCTGTCATCCAGCCTGGAGGGCAGTGAGTGGCACAATCTCCCCGGCTCAAGCGATCCTCCTGCCTCATCCTTCCGAGTAGCTGGGACTACAGGCAAGAACCACCAAGCCTGGTTAATTTTTTTTTTTTTTTTTTTTTTTGAGACAGAGTTTCACTCTTGTTGCCCAGGCTGGAGTGCAATAGCGCAATCTCGGCTCACTAAAACATCTGCCTCCTGGGTTCAAGTCATTCGCCTGCCTCAGCCTCCCAAGTAGCTGGAATTATAGGCATGCGCCACCGTGCCTGGATAATTTTGTATTTTTAGTAGAGACAGGGTTTCTCCATGTTGGCCAGGCTGG…	0.480790340285401
402_SZ108	TTCTCCTCTCTGAAATGGGAAC	57.44	GAGTCCCACTCTGTTGCC	57.296	901	402	chr20:37452730+37453630	Schizophrenia 108		20	20	38824087	38824987	901	98.5% (1 x 2)	TTCTCCTCTCTGAAATGGGAACAATATCTACATTGCAGAGTTGGTGCAGTGATTCCCAGAAAGGTTACATGCAAAGAACTTGGCAGGTGGAAGGTATGCTGGACACAGAAGCTGCCATGATTACCTGGCATTCTTTGTTTCTAGGTTCATTTCATGTATCTAGTTTATAGGTTCTGCAATGTTAGCCTTTAGTTTCATTAAGCATGTTTTACTCTATACTGACTTCAGCAAGTATTTGTTCTATTACCAGTTGGTCTCTCTGGTTTTTTGGCCAAAATGTCCCCATCTCCCTGGTCACGAATACTGTGGATTTTCTGAAATCTTCTTGAAATTCATGAGAAAGATCTGTTAAAGATGGTTATGGTTCCTTTAGAGATTTTCCCAGTTCCTTCTTCTCCT…	0.435072142064373
403_SZ108	CTGTCACTTGACCCCTAGCTG	60.067	TTGCCGAGCAAGTGGAAACA	60.75	918	403	chr20:48130573+48131490	Schizophrenia 108		20	20	49514036	49514953	918	99.8% (1 x 2)	CTGTCACTTGACCCCTAGCTGAGGCTGGAGTATGGAGATGCCAGGTGTGTGAAGATAGGAGGCTTAGGGAGACCCTAGGTCGGAGGACACACTGATGGACCCTGGAAGACAGGAGTCCATGTTGGGGAGGGCTTTGGGGGTCCATGATGACGCAGTCTTAGGGGCTATCTTGGAGGGTCTGACGATCTCACCAAGCACAGGTGTGCTGTCTAGAACCTTCTGTGGGAGAGTGGTCGTCTGCGAGACAGGCTGCTCCGCTTGCCAAAGGATACTCTCGAGCTCTCCGCGGACAGCAGCCAGGGCTTCAGGATTCTTGAGAAGGAAGAGCAGGAGCCAGAAGGCAGCGGGACCCATATTCCCCTGCAAGGAGAAGGGCCCCTGTTATGCCATTATGAGGGC…	0.534858387799564
404_SZ108	AATCAGCTATTGGCCGGGC	60.529	TGGCTGTCTTATACCCTAACAGC	59.866	905	404	chr22:41587092+41587996	Schizophrenia 108		22	22	41191088	41191992	905	99.7% (1 x 2)	AATCAGCTATTGGCCGGGCACAGTGGCTCATGCCTGTAATCCCAGCACTTTGGGAGGCCGAGGTGGGAGGATCACTTGAGCTCAGAAGTTCAAGACAAGCCTGAGCAACACAGCGAGACCCCATCTCTACAACAAATTTTTTTTCTTTTATTATTTATTTTATTTCTTTATTTTTTGAGATGAAGTTTCGCCCTTGTCACCCAGGCTGGAGTGCAGTGGCTCGATCTCGGCTCACTGCAACCTCTGCCTCCCAGGTTCAAGCGATTTTCCTGCCTCAGCCTCCCGAGTAGCTAGGATTATCAGCACATGCCATGTCCGGCTAATTTTTTGTATTTTTGGTAGAGAGAGGGTTTCGCCATGTTGGCCAGCCTGGTCTGGAATTCCTGACCTCAGGTGATC…	0.456353591160221
405_SZ108	CCTCTGGGAAAACTCAACTCAG	58.593	TCAGAGCCTAGTTGATGGCT	58.129	880	405	chr22:42603379+42604258	Schizophrenia 108		22	22	42207373	42208252	880	98.2% (1 x 2)	CCTCTGGGAAAACTCAACTCAGAAAAAAGACCCATATGCTGGCTGGCTGCCTTATTATTCTACGGAGAGGACTACAGGCTAGCAAGCCTGGCCCATACTGTAACAGAGAGCTTCAAGTCATTTTTTAAAACATCTCTTTCTCTCTTAAAAATATAAATCAAGGCTGGGTGCAGTGGCTCAAGCCTGTAATCCCAGCACTTTGGGAGGCCGAGGTGGGCGGATCACCTGAGGTCAGGAGCTCGAGACCAGACTGACCAACGTGGAGAAACCTCATGTCTTCTAAAAATACAAAATTAGCTGTGCATGGTGGCGCATGCCTCTAATCCCAGCTACTCAGGAGGCTGAGGCAAGAGAATCGCTTGAACCTGGGAAGCGGAGGTTGCGGTGAGCTGAGATTGC…	0.465909090909091
406_SZ108	AAAAGACCATGATGCAAGGCAA	59.366	TCTCCTGCCAACCAAATGCT	59.887	916	406	chrX:6029075+6029990	Schizophrenia 108		23	23	6111034	6111949	916	99.8% (1 x 2)	AAAAGACCATGATGCAAGGCAATGAGCTGTTACAAACCATTCTCATTTTAAGATATAGGATAGCATTGGTTTCCTTATTTAGTTTTATTTCAGTGAAAGTAAAAATATGTGAAAGGGCTTACATAGATTCACTCAAGTGCAGAACACCCCAAACCTAATGTATCTTGTTATATAGTCTGAATGGTAGTGTCCTCCCAAAATTCATATGCTGAAATCCAATACACAACATGATAACTCTACCCTCATGAATGGGATGAGTGTCCTTATAAAAGAGGCTGCAGGCCCTTCCACCTTGTCCCTTCCAACATGTGAGGATAAATCAAGAAGATGCCATTTGGGGGAATGGGCCCTCACTAGACACTGAATCTGCTAGCACCTTGATCCTGGACTTCCCAGGAC…	0.400655021834061
407_SZ108	ggtgggagaatttcttaaggcc	58.98	gcacacttaagctccaacacg	60.07	904	407	chrX:21379705+21380608	Schizophrenia 108	Via online Primer3.	23	23	21361587	21362490	904	99.6% (1 x 2)	GGTGGGAGAATTTCTTAAGGCCAGGAGTTTGAGACCAGCCTGGGTAACATAGCAAGACCCTGCCTCTACAAAACAATTAGCTGGGCATGGTGCTAAAAAAATTAGTTGGGCATGGTGCATGCCTGTAGTCCTTGCTACTCAGGAGGCTGAGGTGGGAGGATTGTCTGAGCCCAAGAGTTCAAGGTTACAGTGAGCTATGATCATGCCACTGCACTCCAGCCTGGGTAACAGAGCAAGACCCTGTCTCTCTAAAAAATAAAATAAAATATTTAAAAGATGTTTACTAAAGTAATACATACGAGTTAATAATCAAATGGTTTATAAGGACTTACAATGAAAAAACCATAGTCCTCTGCCCCATCCTTATGCACTTCCTTTTTACCTCATTTAAGCTGATTG…	0.360619469026549
408_SZ108	TGTGCTGAGACTTGTTGCCA	60.107	CCCTAAGGCCCTACCCTTCT	60.03	915	408	chrX:68376661+68377575	Schizophrenia 108		23	23	69156818	69157732	915	99.6% (1 x 2)	TGTGCTGAGACTTGTTGCCATGTATTTCTCCATCTTCAGATAAACGCCACCTTCTCTCCACAGGCCTTGGGCATGAGAACAGCCTCTGACACACTGGGGATTCCACAGGACAAACAGAAAATGGGATAGAGGTTGAGGGTTGAGAGGGTGGCAGGAGGGGAAGGGGGCGCCAGGGCCTTCAGAGGCTGGGGGTGGGAGTGGGGCTAAGCTTGGTCCAAGCCCCCATGACTCCTACTGGGTTCTCTGAACACAGCCCCTGCCTGAGCCTACCTTGGGAGAGGAATCTATTCACCTTGTCACCAAGTGTTGCTGAACACTTTTGTGCCAAGCAGTGCATGCCAGGACTGTAGAAATGGCTCACAAATAGCTTTTGATCTCAAGAACTTAGAGATGGGAGAC…	0.512568306010929
