# Supplementary figures and images for: Parallel functional testing identifies enhancers active in early postnatal mouse brain
Source: eLife journal article supplement (doi:10.7554/elife.69479), 2021-10-04

Figure 1–figure supplement 3

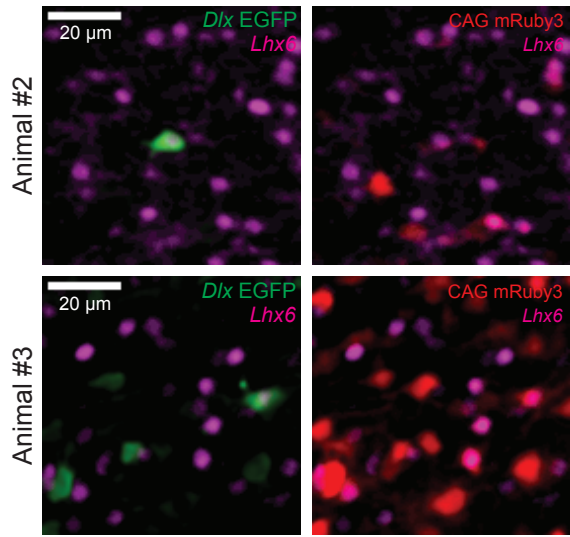

Supplement: supp [file elife-69479-supp-v1.zip]

Figure 1–figure supplement 1

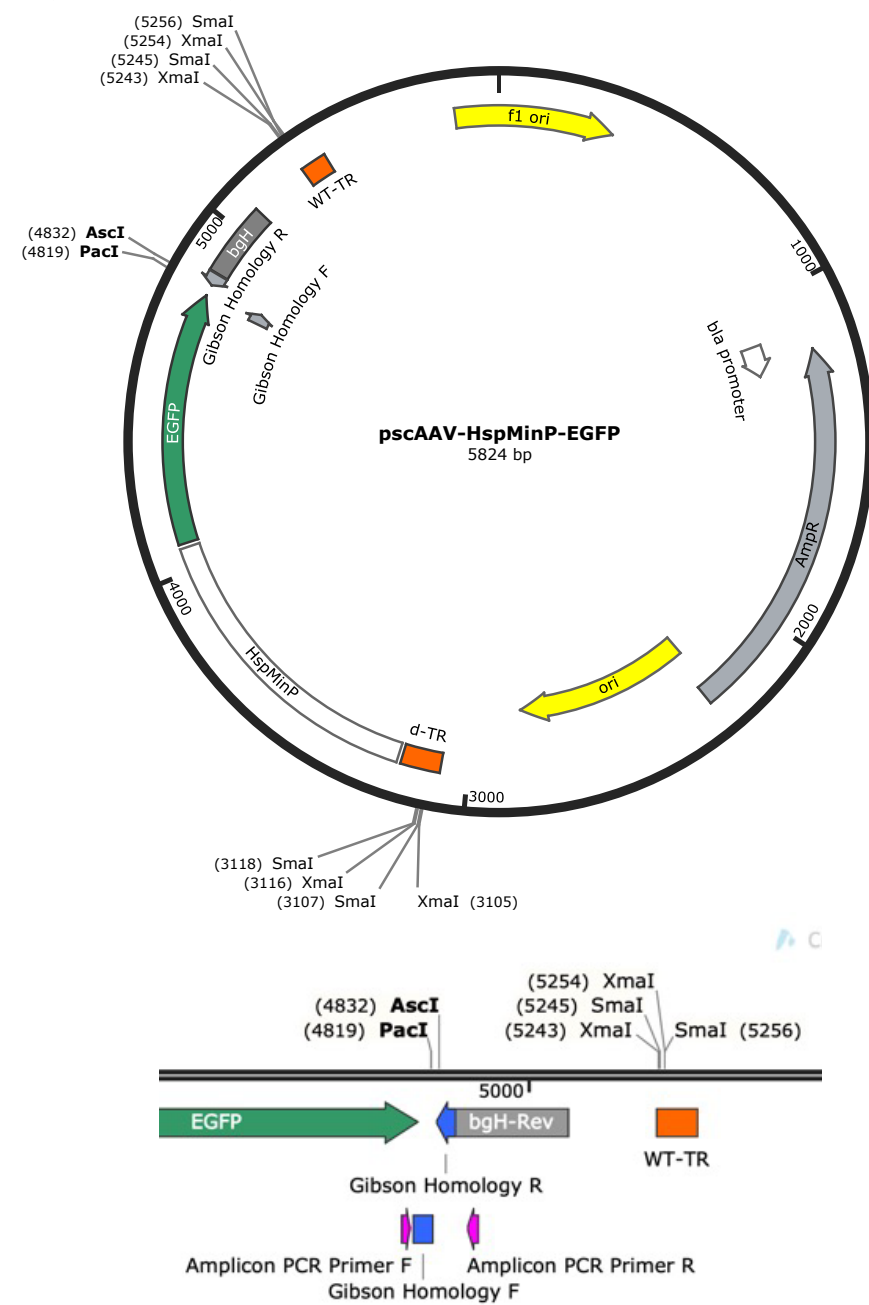

Supplement: supp [file elife-69479-supp-v1.zip › elife_poa_e69479_Figure_1_figure_supplement_1.pdf]

Figure 1–figure supplement 2

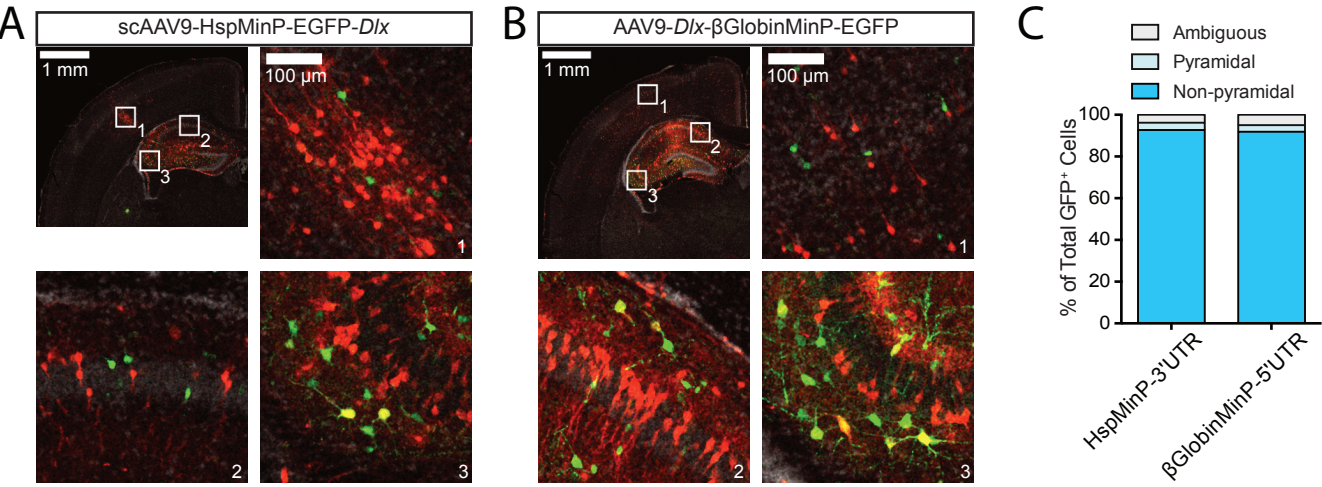

Supplement: supp [file elife-69479-supp-v1.zip › elife_poa_e69479_Figure_1_figure_supplement_2.pdf]

Figure 1–figure supplement 4

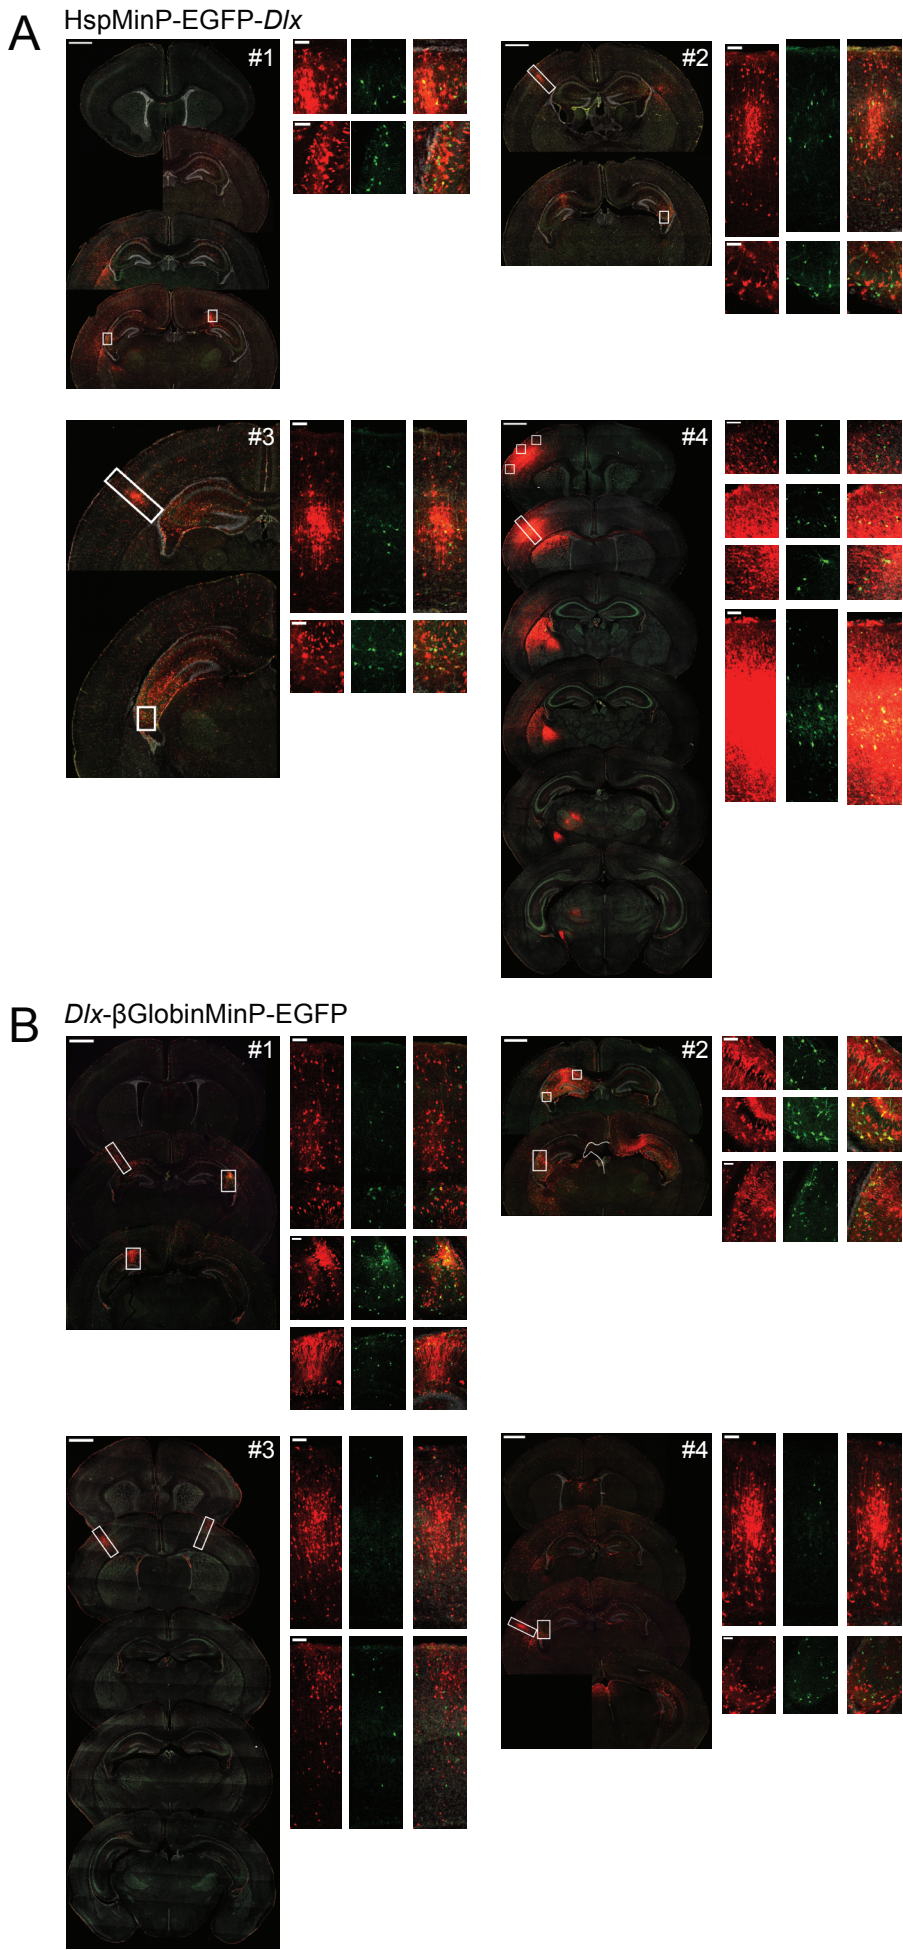

Supplement: supp [file elife-69479-supp-v1.zip › elife_poa_e69479_Figure_1_figure_supplement_4.pdf]

Figure 2—figure supplement 3

Candidate Enhancers Associated  
With Increased RNA Expression

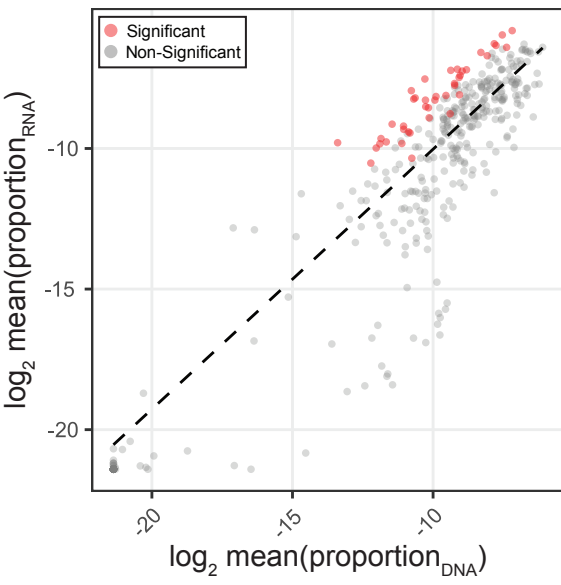

Supplement: supp [file elife-69479-supp-v1.zip › elife_poa_e69479_Figure_2_figure_supplement_3.pdf]

Figure 2—figure supplement 4

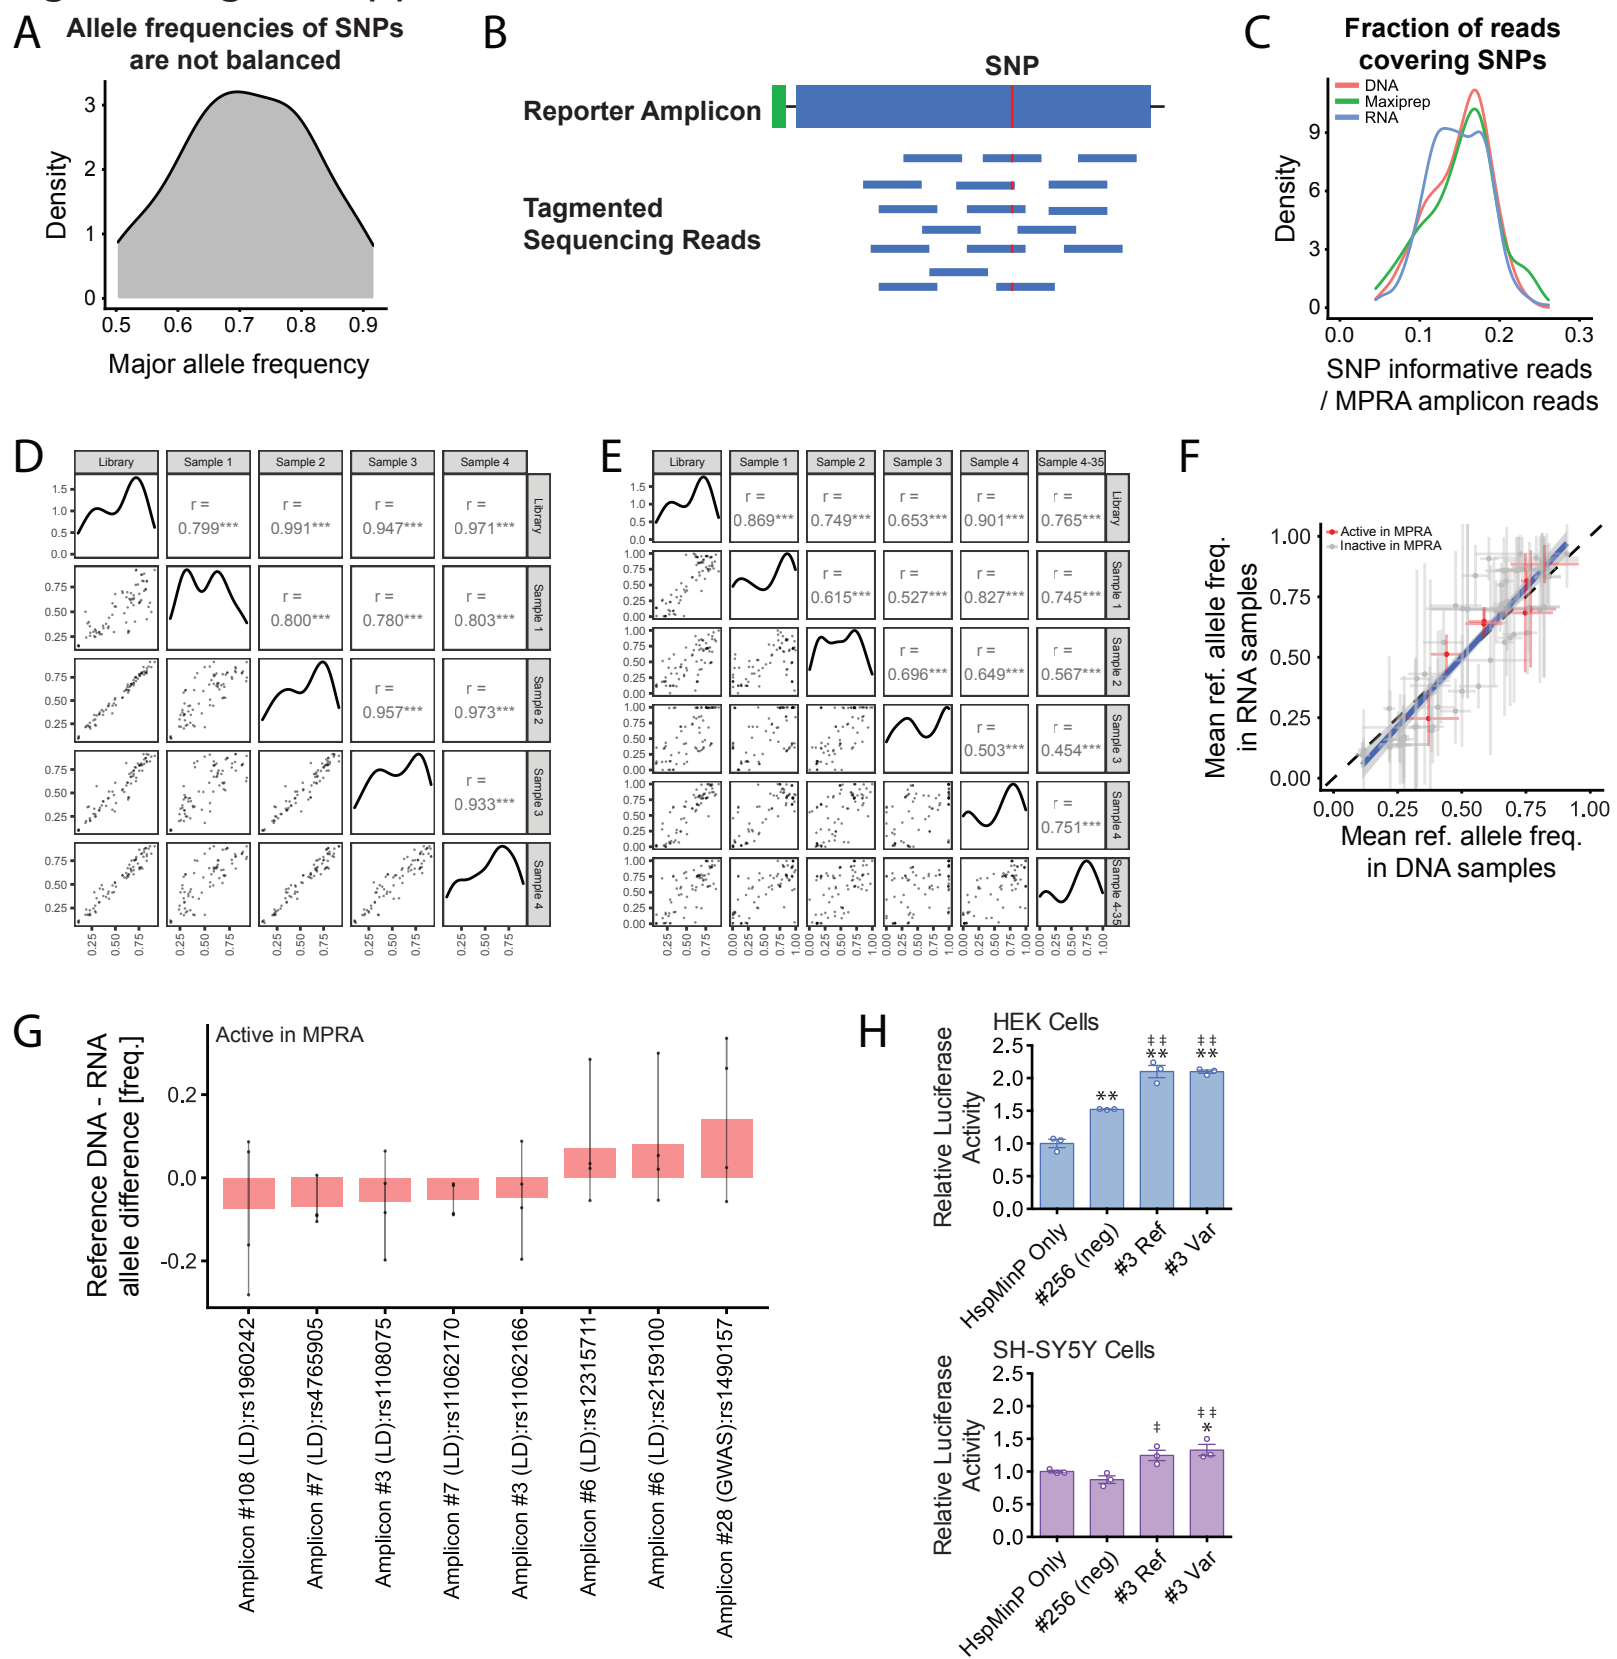

Supplement: supp [file elife-69479-supp-v1.zip › elife_poa_e69479_Figure_2_figure_supplement_4.pdf]

Figure 2—figure supplement 5

Human STAR408 vs mouse miniMPRA orthologs

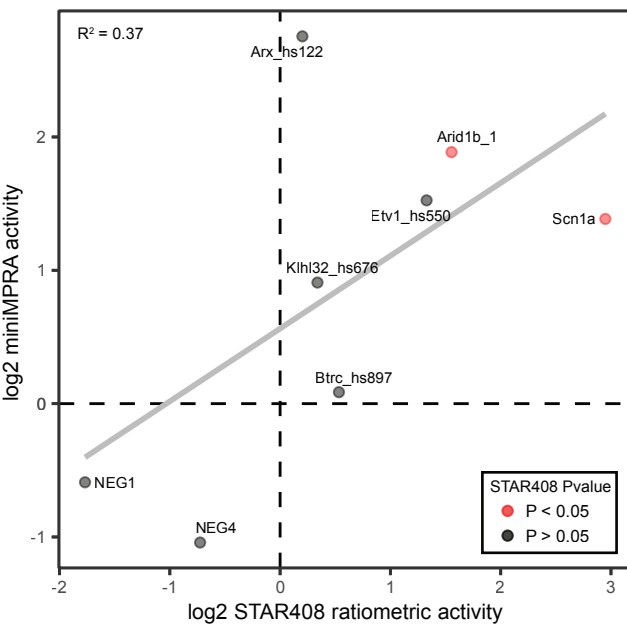

Supplement: supp [file elife-69479-supp-v1.zip › elife_poa_e69479_Figure_2_figure_supplement_5.pdf]

Figure 3—figure supplement 1

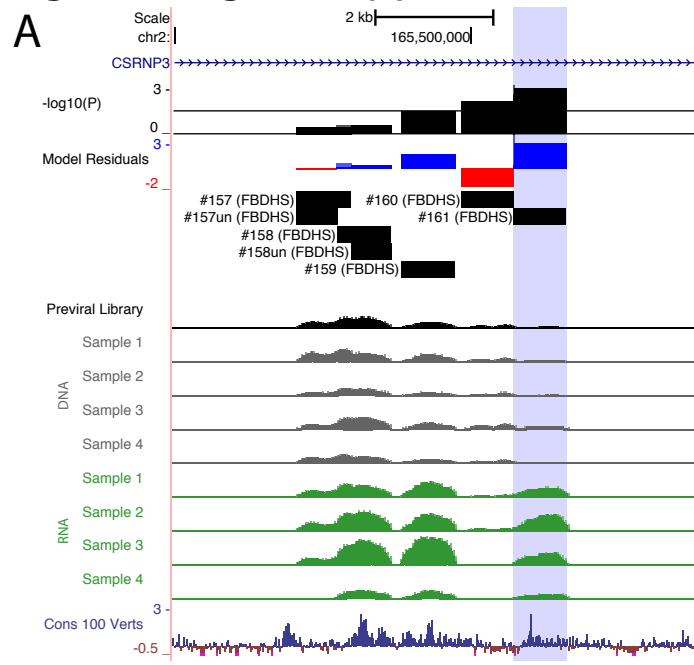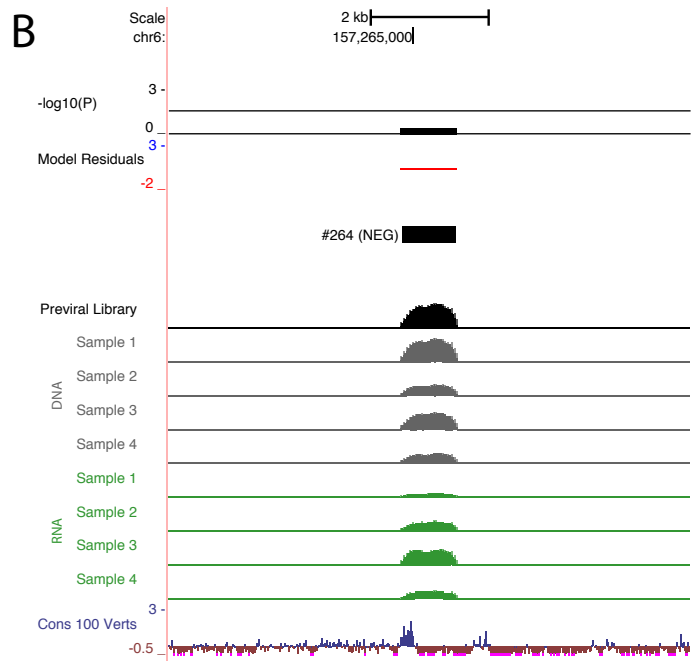

Supplement: supp [file elife-69479-supp-v1.zip › elife_poa_e69479_Figure_3_figure_supplement_1.pdf]

Figure 3–figure supplement 2

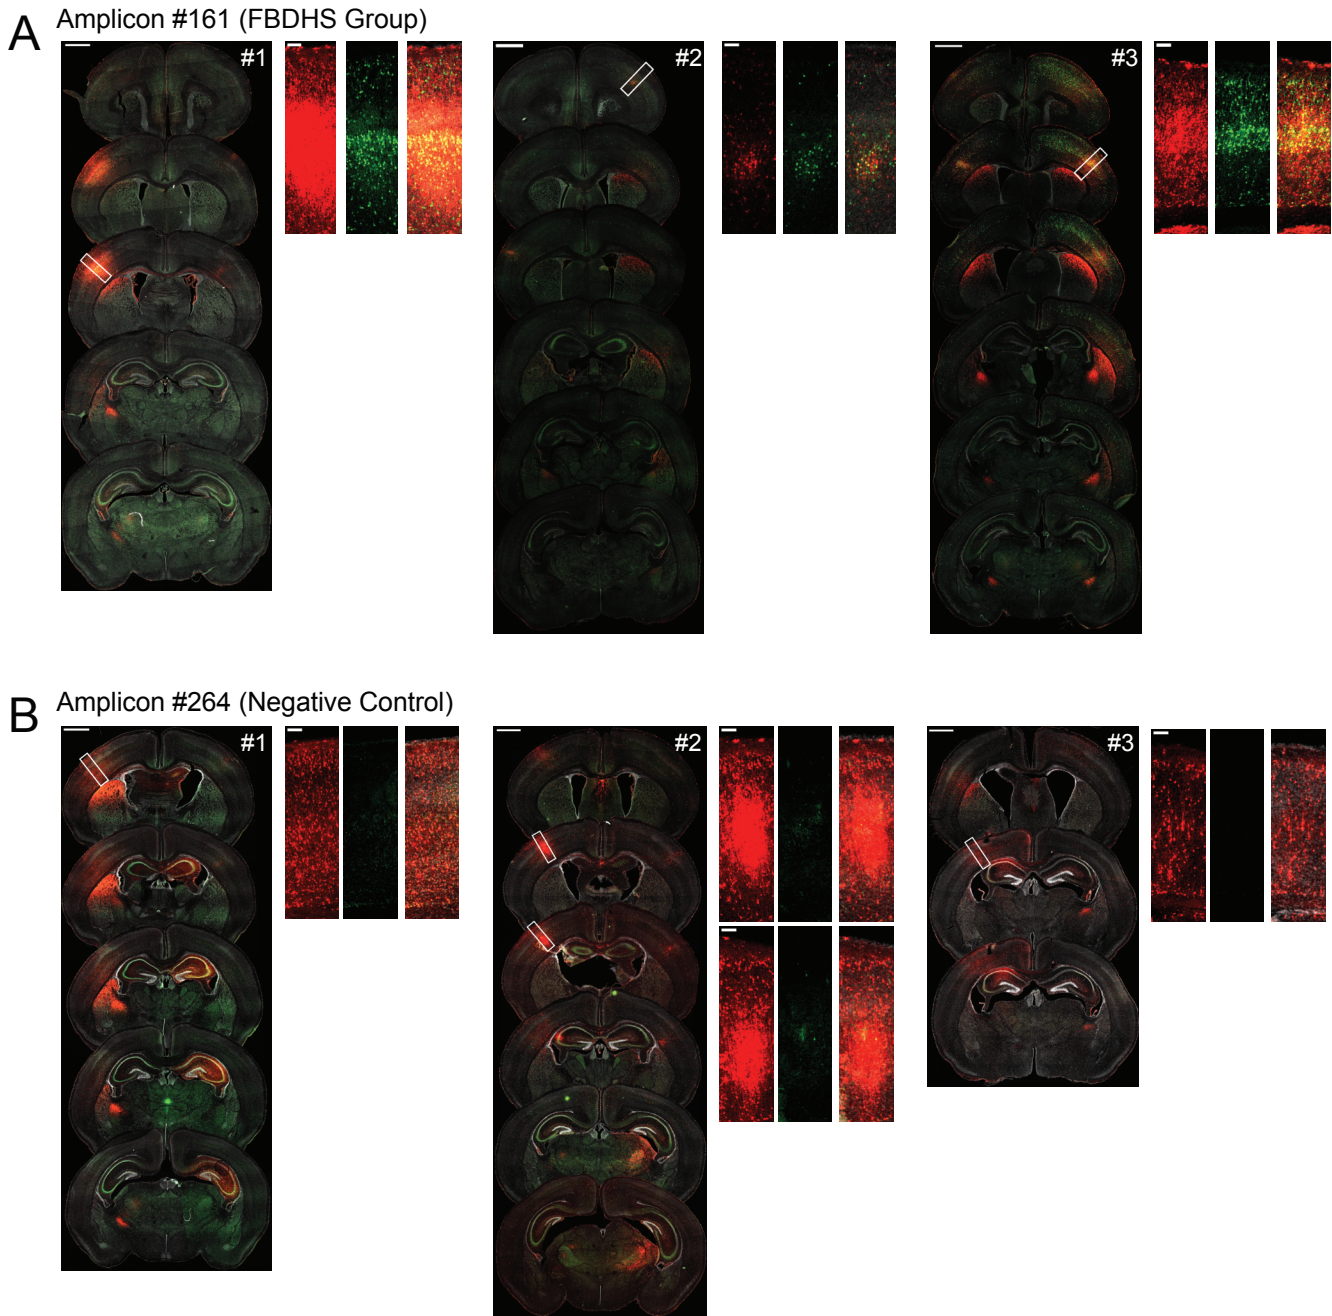

Supplement: supp [file elife-69479-supp-v1.zip › elife_poa_e69479_Figure_3_figure_supplement_2.pdf]

Figure 4—figure supplement 1

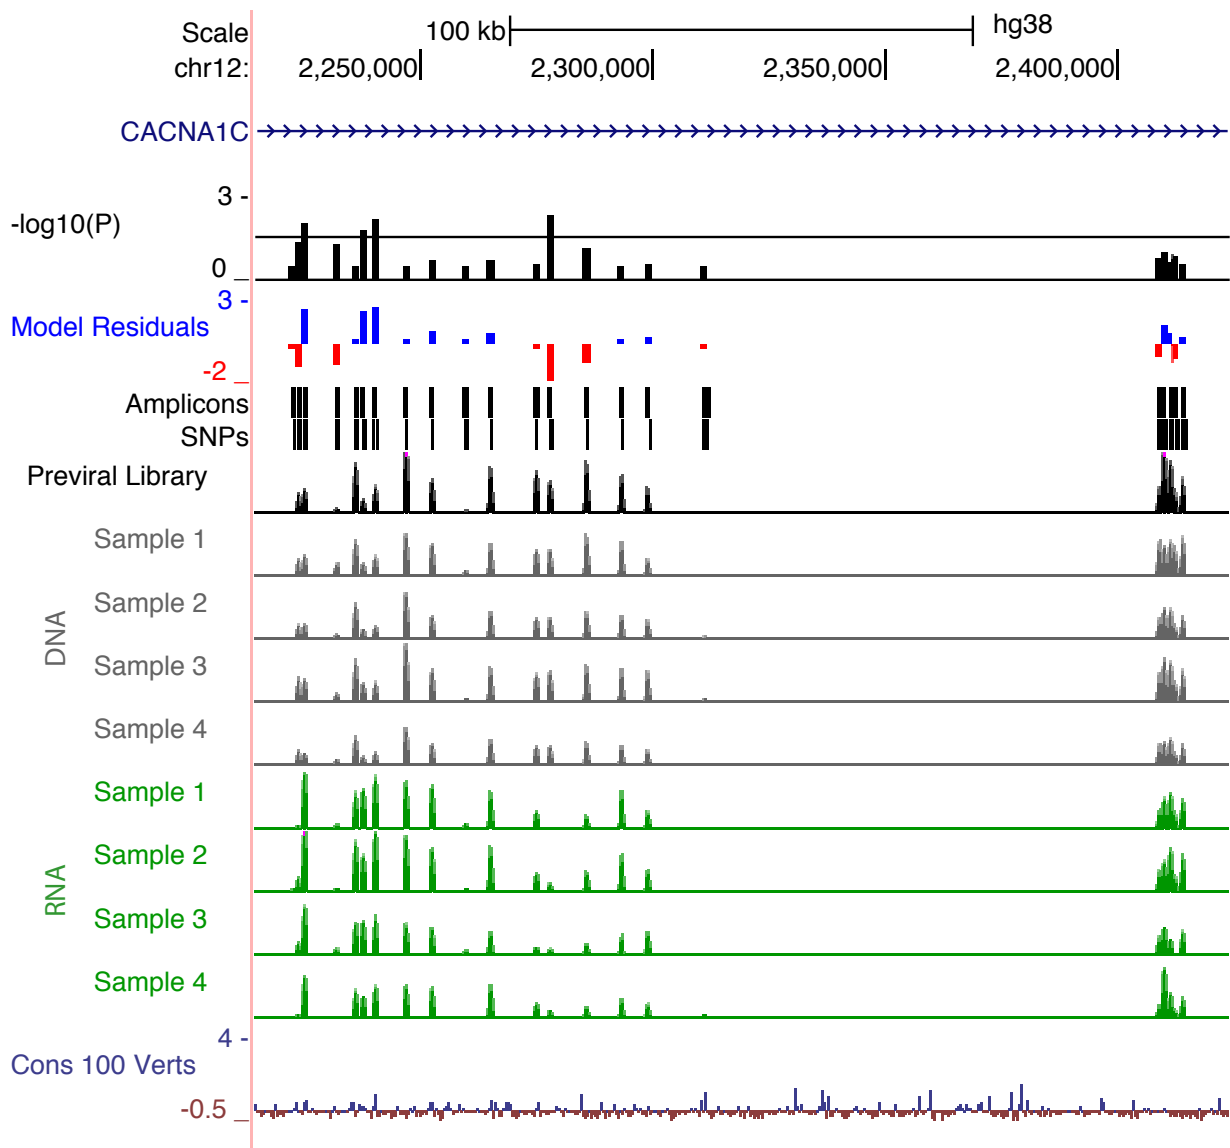

Supplement: supp [file elife-69479-supp-v1.zip › elife_poa_e69479_Figure_4_figure_supplement_1.pdf]

Figure 4–figure supplement 2

A

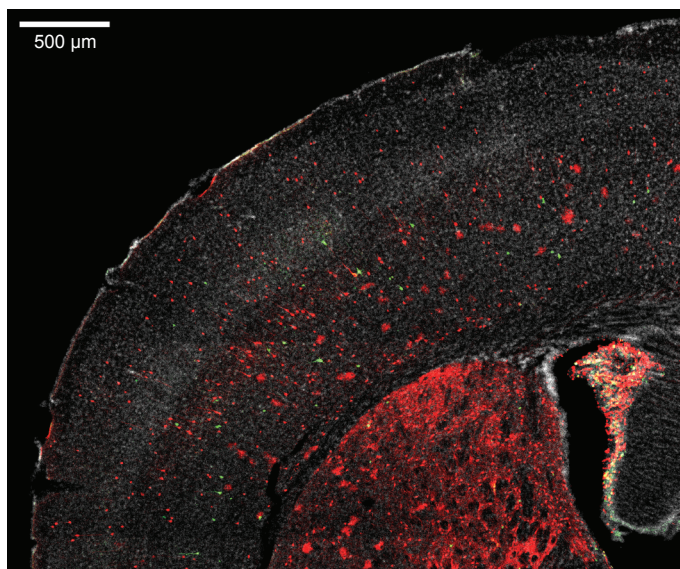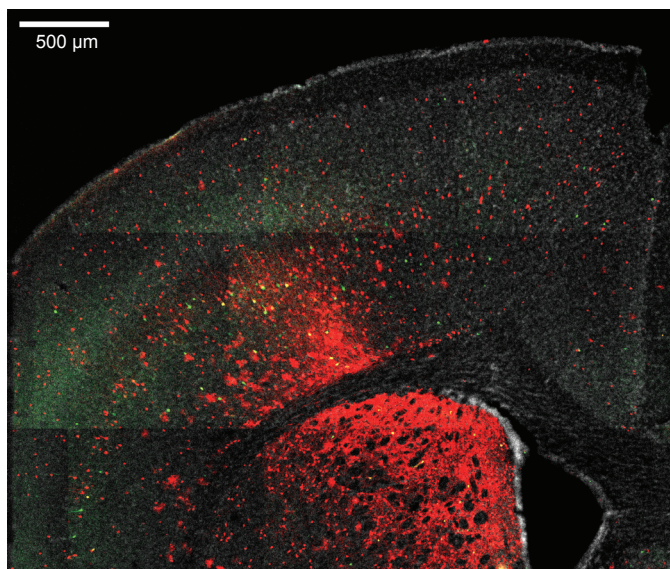

B

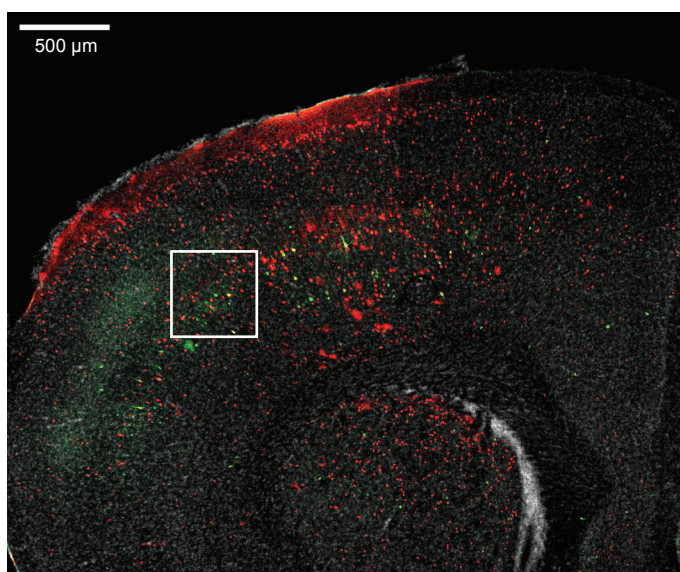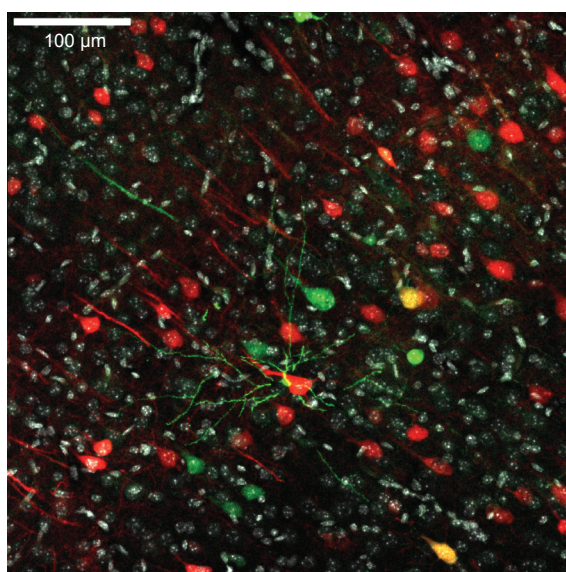

Supplement: supp [file elife-69479-supp-v1.zip › elife_poa_e69479_Figure_4_figure_supplement_2.pdf]
